# Supplementary material
Source: publisher figshare collection journal article supplement (https://future-science-group.figshare.com/ndownloader/files/30751912)
Supplement: Supplementary file 1 [file 30751912]

## Sheet: ZygEffect_6SOM.Imprint
logFC	logCPM	F	PValue	FDR	mgi_symbol	entrezgene_id	chromosome_name	start_position	end_position	Control_Ratio	Control_Ratio.1	Control_Ratio.2	Control_Ratio.3	Control_Ratio.4	Control_Ratio.5	Control_Ratio.6	Control_Ratio.7	MAT_MUT_Ratio	MAT_MUT_Ratio.1	MAT_MUT_Ratio.2	MAT_MUT_Ratio.3	MAT_WT_Ratio	MAT_WT_Ratio.1	MAT_WT_Ratio.2	MAT_WT_Ratio.3	PAT_HAPLO_Ratio	PAT_HAPLO_Ratio.1	PAT_HAPLO_Ratio.2	PAT_HAPLO_Ratio.3	Mat_HAPLO_Ratio	Mat_HAPLO_Ratio.1	Mat_HAPLO_Ratio.2	Mat_HAPLO_Ratio.3	HOMO_SIX_Ratio	HOMO_SIX_Ratio.1	HOMO_SIX_Ratio.2	HOMO_SIX_Ratio.3	HOMO_TWELVE_Ratio	HOMO_TWELVE_Ratio.1	HOMO_TWELVE_Ratio.2	HOMO_TWELVE_Ratio.3	HOMO_SIX_Ratio.4	HOMO_SIX_Ratio.5	HOMO_SIX_Ratio.6	HOMO_SIX_Ratio.7	WT_SIX_Ratio	WT_SIX_Ratio.1	WT_SIX_Ratio.2	WT_SIX_Ratio.3
-3.98758	1.40527	19.3687	3.45444e-05	0.00951674	Gm13261		2	10339283	10374041	0.13643	0	0	#NUM!	0	0	0	0	0.329642	0	0	#NUM!	0.322474	0	0	0	0	0.126991	0	0	0	0	0	0	0.778676	0.541181	0.775394	0.738637	0.129511	0.0527337	0.0623389	0.243901	0.0426843	0.0739134	0.154888	0.137642	0	0	0.321323	0
-7.17794	10.7602	615.47	5.88979e-40	1.15204e-35	Sfmbt2	353282	2	10370510	10595253	0.00601426	0.00432087	0.00276244	0.00334865	0.00599363	0.00405994	0.00252854	0.00389537	0.0191536	0.0157545	0.00812301	0.0245717	0.0168614	0.00866696	0.00580465	0.00494301	0.00278723	0.00585534	0.00205899	0.00411115	0.00552888	0.00504534	0.00480408	0.0044749	0.442306	0.471566	0.363112	0.426582	0.250634	0.122263	0.405586	0.36728	0.380609	0.388507	0.315267	0.297544	0.00423465	0.00517905	0.00607827	0.00693127
-6.02562	3.0491	130.156	3.6652e-18	6.51739e-15	Gm22072		2	10465287	10465407	0	0	0	0	0	0	0	0.0285395	0.0223602	0.114539	0	0	0	0	0	0	0	0	0	0	0	0.0703436	0.0293164	0.0231035	0.552468	0.45496	0.352788	0.514513	0.359297	0.154237	0.397681	0.58027	0.487061	0.350453	0.224704	0.283271	0	0.0287782	0	0.0173197
-5.67137	1.43532	45.0314	1.01671e-08	3.8244e-06	Mir466m	100526481	2	10466663	10466746	0	0	0	0	0	0	0	0	0	0	0	0.139582	0	0	0	0	0	0	0	0	0	0	0	0	0.384792	0.767583	0.46884	0.458825	0.115187	0.209129	0.680253	1	0.231727	0.22056	0.280295	0.237364	0	0	0	0
-5.6024	3.66984	115.96	6.69144e-17	8.72564e-14	Mir466f-1	100124486	2	10466944	10467037	0	0	0	0	0	0	0	0	0	0.0656141	0	0	0.055071	0	0	0	0	0.052169	0	0	0	0	0	0.0144446	0.468625	0.557158	0.387664	0.468254	0.197537	0.193802	0.291277	0.283744	0.275837	0.390765	0.252165	0.213913	0	0	0	0.0734842
-6.775	3.78252	175.265	1.85821e-21	7.26933e-18	Mir669f	100316667	2	10467229	10467349	0	0	0	0	0	0.0126294	0	0	0.0204962	0	0.0394457	0.162949	0	0	0.0195322	0	0	0	0.0475332	0	0	0	0	0	0.426948	0.550902	0.60941	0.508023	0.229322	0.152264	0.231394	0.37397	0.342186	0.36618	0.21052	0.314811	0	0.0226038	0	0
-6.54901	3.35243	204.379	2.35887e-22	1.15349e-18	Mir669e	100316806	2	10467495	10467613	0	0	0	0	0	0	0	0	0.0703316	0.0265825	0	0	0	0	0	0	0	0	0	0	0	0	0.0157913	0	0.43045	0.477029	0.244511	0.365356	0.297305	0.174607	0.265608	0.334128	0.290883	0.361408	0.310675	0.266876	0	0	0	0
-6.50218	3.32843	125.498	8.81149e-18	1.43627e-14	Mir669b	735255	2	10467790	10467886	0.0351752	0	0	0	0.0213992	0	0	0	0.0245972	0	0.0537177	0.0389757	0	0	0	0	0	0	0	0.0251158	0	0	0	0	0.360172	0.42515	0.265851	0.414014	0.316412	0.128088	0.515442	0.624999	0.397321	0.353206	0.277796	0.37525	0	0	0	0.0202708
-6.32284	2.98277	129.829	2.89469e-17	4.0443e-14	Gm23578		2	10468069	10468172	0	0	0	0	0	0	0	0	0.0447372	0	0	0.0464091	0.028888	0	0	0	0	0	0	0	0	0	0	0	0.417741	0.543013	0.444093	0.547754	0.381632	0.14474	0.586489	0.518133	0.338955	0.295758	0.214642	0.131415	0	0	0	0.0433564
-5.68225	2.43937	67.2846	7.51667e-12	3.97368e-09	Mir669d	100316664	2	10468343	10468463	0	0	0.0864277	0	0	0	0	0	0	0	0	0	0	0	0	0	0	0	0	0	0	0	0.021381	0	0.484058	0.509315	0.577203	0.64021	0.355404	0	0.290342	0.0855062	0.246022	0.244849	0.320685	0.310855	0	0	0.0951965	0.0796326
-6.71436	2.82338	108.133	3.04468e-15	2.5893e-12	Mir466f-2	100124445	2	10468675	10468768	0	0	0	0	0	0	0	0	0.115929	0	0	0.0464091	0	0	0.0319207	0	0	0	0	0	0	0	0	0	0.507879	0.287953	0.405682	0.429753	0.147904	0.0458726	0.387102	0.237375	0.364792	0.474301	0.33626	0.310855	0	0	0	0
-5.80756	2.57237	70.3708	2.54496e-12	1.50847e-09	Mir669l	100316815	2	10468971	10469068	0.0559302	0	0	0	0	0	0	0	0.0895418	0	0	0.139582	0.0910757	0	0	0	0	0	0	0	0	0	0	0	0.355622	0.485492	0.290456	0.429753	0.302621	0.0555007	0.381129	0.401928	0.299375	0.35534	0.365875	0.341557	0	0	0.0316196	0
-6.13179	2.70917	126.384	1.29612e-17	1.95017e-14	Mir669d-2	100526550	2	10471644	10471729	0	0	0	0	0.035406	0	0	0	0.0895418	0	0.0537177	0	0	0	0	0	0	0	0	0	0	0	0	0	0.529598	0.52842	0.438238	0.389556	0.319105	0.174607	0.422405	0.502985	0.261243	0.401687	0.370482	0.313417	0	0	0.0452053	0
-5.1903	2.03104	40.0787	2.83838e-08	1.04752e-05	Mir466f-3	100124475	2	10471953	10472046	0	0	0	0	0	0	0	0	0.174063	0	0	1	0	0	0	0	0	0	0	0	0	0	0	0	0.621478	0.679807	0.37858	0.409727	0	0.110666	0.158049	0.240268	0.254753	0.433274	0.0940845	0.0493154	0	0.119296	0	0
-5.48504	2.76889	89.8857	2.26057e-14	1.76867e-11	Mir297a-2	723945	2	10472254	10472343	0	0	0	0	0.0331237	0	0	0.0586612	0.0393652	0	0	0	0.114893	0	0.0342043	0	0	0	0	0	0	0	0	0	0.494692	0.471231	0.469343	0.567222	0.458342	0.190315	0.476925	0.196386	0.344125	0.373669	0.348158	0.187355	0	0	0	0
-4.63391	1.3145	30.9937	4.0328e-07	0.000138389	Gm26073		2	10473351	10473477	0.486626	0	0	0	0	0	0.0946213	0	0	0.329557	0	0	0	0	0	0	0	0	0	0	0	0.114467	0	0	0.808499	1	0.628906	0.361112	0.454496	0.209129	0.515442	0.5891	0.277752	0.22056	0.206122	0.0689924	0	0	0	0
-6.00182	1.69403	50.8773	2.0331e-09	8.1158e-07	Mir467c	100124487	2	10473931	10474027	0	0	0	0	0	0	0	0	0	0	0	0	0.322474	0	0.0639348	0	0	0	0	0	0	0	0	0	0.308802	0.266284	0.224625	0.585587	0.533931	0.283998	1	0.600857	0.430407	0.41634	0.372435	0.475833	0	0	0	0
-4.40015	2.2674	42.5358	5.95992e-09	2.28581e-06	Mir669k	100316663	2	10475300	10475426	0	0	0	0	0.0759738	0	0	0	0	0.109439	0.0968426	0	0	0	0	0.0740094	0	0.0581249	0	0.0856585	0	0.0382519	0	0.0335237	0.621478	0.629422	0.63617	0.508898	0.129511	0.186951	0.389589	0.138888	0.347151	0.216721	0.198253	0.152851	0.0596138	0	0	0
-6.05652	2.00367	50.0461	1.97652e-09	8.05434e-07	Gm26491		2	10475500	10475620	0	0	0	0	0	0	0	0	0	0	0.074434	0	0	0.0998958	0	0	0	0	0	0	0	0	0	0	0.572702	0.435679	0.196204	0.556747	0.234486	0.105165	0.463601	0.349649	0.301576	0.297117	0.121631	0.0939954	0	0	0	0
-4.06931	1.53701	33.1428	1.55238e-07	5.52082e-05	Mir467a-1	735286	2	10476346	10476418	0	0	0	0	0	0	0.104041	0.0466777	0	0.329557	0	0	0	0	0	0	0.0936815	0.126991	0	0	0.25656	0	0	0	0.353706	0.40263	0.320079	0.414014	0.221204	0.0956542	0.321008	0.306882	0.105808	0.39338	0.326445	0.365632	0	0	0	0
-6.40788	1.90574	73.9331	5.15727e-12	2.88218e-09	Gm25701		2	10477710	10477836	0	0	0	0	0	0	0	0	0	0	0	0	0	0	0	0	0	0	0	0	0	0	0.0732068	0	0.39096	0.531029	0.385628	0.30537	0.238059	0.131268	0.515442	1	0.394892	0.315603	0.418267	0.307781	0	0	0	0
-6.42948	2.89441	76.2164	5.78989e-13	3.53907e-10	Mir669j	100316770	2	10477910	10478030	0	0	0	0	0	0.0211286	0	0	0.0492147	0.042775	0	0.447858	0.0433637	0	0	0	0	0	0	0	0	0	0	0	0.581577	0.619062	0.668604	0.525136	0.0716199	0.0270809	0.2713	0.163532	0.244625	0.165019	0.0675621	0.153659	0	0	0	0
-4.71585	1.00094	29.4068	9.79306e-07	0.000330262	Mir467a-2	100124624	2	10478798	10478880	0	0	0	0	0	0	0	0	0	0	0	0	0	0	0	0	0	0	0	0	0	#NUM!	0.33925	0	0	0.361497	0.211981	0.299817	0.675632	0.345917	1	0.928074	0.869551	0.453567	0.721944	0.54759	0	0	0	0
-4.93594	2.18955	48.2731	9.25685e-10	4.11509e-07	Gm24315		2	10480165	10480291	0	0	0	0.086191	0	0	0	0	0.14083	0.140783	0.080655	0	0	0	0	0	0.0430084	0	0	0	0.0287301	0	0.0277329	0.0415564	0.692467	0.715609	0.526673	0.528005	0.0494955	0	0.1057	0.0510202	0.266804	0.223731	0.0305112	0.147421	0	0	0	0
-5.24712	0.826076	22.0847	1.55714e-05	0.0043511	Gm25451		2	10480365	10480485	0	0.484738	0	0	0	0	0	0	0	#NUM!	0	#NUM!	0	0	#NUM!	0	0	0	0	0	0	0	0	0	0.413025	0.386153	1	0.868321	0	0.345917	0.298489	0.472588	0.390595	0.341578	0.206122	0	0	0	0	0
-6.77446	2.07726	22.5573	1.13296e-05	0.00325892	Gm23651		2	10482812	10482931	0.240102	0	0	0	0	0	0	0	0	0	0	0.195714	0.159934	0	0	0	0	0	0	0	0	0	0	0	0.935659	0.959333	0.87832	0.878379	0	0	0	0.062972	0.0818738	0.133234	0	0	0	0	0	#NUM!
-2.98884	1.68889	19.0252	4.14973e-05	0.011119	Gm24640		2	10489971	10490096	0.240102	0.349626	0.415044	0.239198	0	0	0	0	0.227825	0.0656141	0.208355	0.139582	0.302012	0.295411	0	0.264522	0	0	0	0	0	0	0	0	0.353706	0.775779	0.604738	0.701945	0.274685	0.434788	0.1057	0	0.530089	0.23738	0.341793	0.237364	0.15979	0.0793583	0.205244	0
-5.46458	2.78053	23.4263	6.62248e-06	0.00196266	Gm24673		2	10491860	10491983	0	0.0159611	0	0	0	0	0	0	0	0	0	0	0	0	0	0.0168383	0	0	0.507723	0	0	0	0	0	0.0776589	0.0473137	0.0216732	0.149126	0.656279	0.413539	0.841739	0.611128	0.918571	0.841348	0.799243	0.713461	0.0209213	0	0	0
-7.17917	2.77632	110.451	9.35838e-16	9.15249e-13	Gm26156		2	10499204	10499326	0.0528139	0	0	0	0	0	0	0	0.0532086	0.042775	0	0	0	0	0	0	0	0	0	0	0	0.0246016	0	0	0.509497	0.653645	0.337278	0.61339	0.224382	0.127317	0.309339	0.196386	0.250603	0.321719	0.176869	0.276529	0	0	0	0
-5.20897	3.71167	85.7523	2.11826e-14	1.72638e-11	Gm23571		2	10499763	10499889	0.0570523	0.0382307	0.0400649	0.108154	0.0250502	0	0	0	0.0158668	0.0138498	0.0375282	0.0314255	0.0744542	0.008503	0.0242351	0.0641145	0.0215193	0	0	0	0	0.0215286	0.0176963	0	0.33388	0.350313	0.273576	0.287612	0.430985	0.154237	0.549818	0.538908	0.451686	0.485841	0.443527	0.405898	0.032845	0.0107812	0	0.0391907
-7.33486	3.7437	201.68	7.60978e-24	7.44236e-20	Gm25316		2	10499966	10500083	0	0	0	0	0.0168408	0.0191736	0	0	0.0302763	0	0	0.0335948	0.015878	0	0	0	0.0156534	0	0	0	0	0	0.0138715	0	0.351659	0.520417	0.385628	0.338877	0.350094	0.105165	0.451146	0.529221	0.411886	0.380333	0.423845	0.266386	0	0	0	0
-7.8736	3.53003	104.425	1.12038e-15	1.04355e-12	Gm23988		2	10501633	10501754	0.0184244	0	0	0	0.0554711	0	0	0.0193902	0.0807224	0	0	0.0295194	0	0.0124218	0	0	0	0	0	0	0	0	0	0.0676858	0.282351	0.2922	0.249799	0.271968	0.478211	0.199279	0.421771	0.385461	0.560062	0.390181	0.447933	0.474917	0	0	0	0
-6.81849	3.64819	160.221	5.20977e-21	1.69838e-17	Gm25673		2	10502191	10502317	0	0.0214097	0	0.02422	0	0	0.015359	0	0.0393652	0.0468521	0	0	0.0280372	0	0.0456296	0	0.024887	0	0	0	0	0	0.0235915	0	0.501603	0.614921	0.408048	0.60621	0.156812	0.0527337	0.210069	0.190424	0.34201	0.411197	0.264043	0.227452	0.0166967	0	0	0
-7.19993	2.60184	85.8963	2.47454e-13	1.6134e-10	Gm25753		2	10502391	10502511	0	0	0	0	0	0	0	0	0	0	0	0	0	0.0315045	0	0	0.0356017	0	0	0	0	0	0.0244335	0	0.632358	0.633692	0.419223	0.434256	0.384568	0	0.539193	0	0.338955	0.397688	0.177879	0.223715	0	0	0	0
-5.21675	1.0509	27.7467	2.25419e-06	0.000699873	Mir466b-3	100124474	2	10503565	10503645	0	0	0	0	0	0	0	0	0	#NUM!	0	0.0887016	0	0	0	0	0	0	0	0	0	0	0	0	0.546744	0.585991	0.573565	0.868321	0.510154	0.209129	0.680253	#NUM!	0.472941	0.307801	0	0.341557	0	0	0	#NUM!
-5.54494	1.66145	52.8681	7.11679e-10	3.23731e-07	Mir467e	100124448	2	10505721	10505807	0	0	0	0	0	0	0	0	0	0	0	0	0	0.045043	0	0	0	0	0	0	0	0.0736852	0	0.159098	0.563324	0.447149	0.135636	0.503598	0.245542	0.149867	0	0.331674	0.506298	0.358435	0.25716	0.383661	0	0	0	0
-4.71492	3.61787	81.2851	6.50079e-14	4.70946e-11	Mir466p	100526497	2	10506006	10506094	0	0	0	0.0205298	0	0.05171	0.0946213	0	0.0690963	0	0	0	0.0173227	0	0	0	0.026146	0.0147533	0	0.057154	0.0272194	0	0.0162924	0.0442043	0.454145	0.418645	0.371244	0.409727	0.257694	0.153491	0.440164	0.468017	0.467049	0.32195	0.216883	0.24729	0.0153491	0.0186108	0.037957	0
-6.38361	3.01163	155.294	1.80563e-19	4.41475e-16	Gm22051		2	10506555	10506681	0	0	0	0	0.0302034	0	0	0	0	0	0	0	0	0.053569	0	0	0	0	0	0	0	0	0	0	0.410017	0.356939	0.337278	0.510733	0.38892	0.209129	0.515442	0.283744	0.462138	0.404197	0.441123	0.482863	0	0	0	0.0183199
-6.09245	1.62122	52.6668	1.26495e-09	5.37877e-07	Gm22678		2	10506755	10506855	0	0	0	0	0	0	0	0	0.0895418	0	0	0	0	0	0	0	0	0	0	0	0	0	0	0	0.652344	0.585991	0.320079	0.530614	0.257694	0.139952	0.37145	0.151975	0.221708	0.408882	0	0.280084	0	0	0	0
-6.0155	2.49176	90.5245	8.04176e-14	5.61774e-11	Mir466	723922	2	10507918	10507990	0	0	0	0	0	0	0	0	0.0820697	0	0	0.0464091	0	0	0	0	0	0	0	0	0	0	0	0	0.416848	0.614247	0.484939	0.507814	0.37615	0	0.285153	0.300751	0.410846	0.482886	0.434805	0.0705564	0	0	0	0
-6.64911	2.58784	85.9995	1.36691e-13	9.21957e-11	Gm22091		2	10508453	10508579	0.025655	0	0	0	0	0	0.0474074	0	0.0703316	0.0757217	0	0	0	0	0	0	0	0	0	0	0	0.068784	0	0	0.337445	0.40263	0.467731	0.422864	0.368374	0.0620081	0.347202	0.518133	0.338955	0.268042	0.403007	0.120113	0	0	0	0
-6.49997	2.18678	87.3797	4.72479e-13	2.98119e-10	Mir669c	735273	2	10509296	10509404	0	0	0	0	0	0	0	0	0	0	0	0	0	0	0	0	0	0	0	0	0	0.128714	0	0	0.252478	0.274017	0.360986	0.553924	0.384568	0.184774	0.424106	0.594529	0.483561	0.564641	0.415407	0.205951	0	0	0	0
-5.68349	2.44752	63.4524	2.9646e-11	1.48686e-08	Mir669a-2	735258	2	10510164	10510260	0	0	0	0	0	0	0	0	0.101913	0	0	0.493249	0	0	0	0	0	0	0	0	0	0	0	0	0.696361	0.550902	0.503461	0.327622	0.396777	0.0842284	0.278922	0.253484	0.217016	0.424075	0.206122	0.147421	0.0501767	0	0	0
-5.45483	2.42035	33.086	2.75558e-07	9.62486e-05	Gm22239		2	10510461	10510563	0	0	0	0	0	0	0	0	0.0204962	0	0	0	0	0	0	0	0	0	0	0	0	0	0	0	0.122031	0.118788	0.107297	0.0830569	0.316412	0.232072	0.769753	0.790067	0.679926	0.624075	0.67502	0.608795	0	0.0316609	0	0
-5.63225	2.62649	49.0421	1.56813e-09	6.52609e-07	Gm22925		2	10510791	10510892	0	0	0	0	0	0	0	0	0.0895418	0	0	0.0750272	0	0	0	0.0641145	0	0	0	0	0	0	0	0	0.75014	0.601557	0.885943	0.780256	0.0943225	0.116775	0.138801	0.221565	0.183748	0.108787	0.088726	0.140754	0	0.0907514	0	0
-5.95976	1.88314	44.8708	4.58169e-09	1.79236e-06	Gm23542		2	10511370	10511465	0	0	0.0791928	0	0	0	0	0	0	0	0	#NUM!	0	0	0.241701	0	0	0	0	0	0.0860218	0	0	0	0.637567	0.447149	0.343429	0.506824	0.119596	0.0658697	0.166285	0.263851	0.185596	0.23738	0	0.383661	0	0	0	0
-6.04502	2.95339	97.0933	3.022e-15	2.5893e-12	Mir297b	735281	2	10511667	10511775	0	0	0.0315915	0	0.0270265	0.0295714	0	0	0.0953279	0	0	0	0.03815	0	0	0.0436764	0	0	0	0	0.0206913	0	0	0.018906	0.484058	0.56152	0.377048	0.522162	0.106364	0.0251492	0.375484	0.211864	0.303545	0.319438	0.198943	0.268025	0	0.0452635	0	0
-4.43743	1.74286	50.5697	5.32418e-10	2.47955e-07	Mir466d	100124465	2	10511967	10512062	0	0	0	0	0.406588	0	0	0	0	0	0	0.195714	0	0	0	0	0	0	0	0	0	0.103059	0	0	0.484058	0.6113	0.216864	0.461321	0.286	0.3059	0.191191	0.323362	0.460798	0.535499	0.320685	0.256961	0	0	0	0
-5.53819	2.18213	55.0561	3.60082e-10	1.71786e-07	Mir669m-1	100316701	2	10512790	10512887	0	0	0	0	0	0	0	0	0	0	0	#NUM!	0	0	0	0	0	0.0423947	0	0	0	0	0	0	0.63927	0.751215	0.349809	0.552857	0.277297	0.0620081	0	0.573393	0.361349	0.270371	0.266591	0.180375	0	0	0	0
-5.055	1.27506	54.6765	1.01418e-09	4.40828e-07	Mir466n	100526524	2	10513741	10513834	0	0	0	0	0	0	0	0	0	0	0	0	0	0	0	0	0	0	0	0	0	0	0	0	0.584597	0.361497	0.247855	0.34636	0.159209	0.116775	0.553775	0.287355	0.440983	0.320477	0.437861	0.341557	0	0	0	0
-6.58256	3.33925	121.195	7.2178e-17	8.82376e-14	Mir669o	100316702	2	10514300	10514395	0	0	0	0	0	0	0	0	0	0.0383279	0	0.0975955	0	0.0188884	0	0	0	0	0	0.0374318	0	0	0	0	0.448461	0.514087	0.35513	0.429753	0.172385	0.107298	0.466956	0.232705	0.39997	0.265188	0.330349	0.18188	0	0.0237354	0	0
-5.1204	2.21964	58.5928	1.39633e-10	6.82805e-08	Mir297a-3	100124482	2	10515820	10515921	0	0	0	0	0	0	0	0	0.123189	0	0	0	0	0	0	0	0	0	0	0	0	0	0	0	0.384792	0.653645	0.526673	0.56111	0.198696	0.0810032	0.313133	0.287355	0.204061	0.151009	0.158836	0.129079	0.0596138	0	0	0
-7.18446	2.52667	109.601	6.47465e-16	6.66548e-13	Mir466l	100316769	2	10516097	10516217	0	0	0	0	0	0.0689053	0	0	0	0	0	0	0.151452	0	0	0	0	0	0	0	0	0	0.0341981	0	0.61356	0.653645	0.367699	0.385758	0.409788	0.149867	0.335051	0.479615	0.305317	0.297117	0.32402	0.35978	0	0	0	0
-7.60689	3.98898	147.713	4.66724e-20	1.30416e-16	Mir297a-4	100124435	2	10517067	10517164	0	0	0	0.0192714	0	0.0112572	0	0	0.0124517	0	0.0261068	0	0	0.0124218	0	0	0	0	0.0132175	0	0	0	0.00950562	0	0.588416	0.640072	0.446059	0.551316	0.215749	0.0714301	0.321008	0.256848	0.28245	0.256978	0.164	0.145541	0	0	0	0
-7.36117	4.27419	197.023	1.5075e-23	9.82887e-20	Gm24806		2	10517337	10517426	0.0103091	0	0	0	0.0250502	0.0115072	0	0.00969768	0.011178	0.0105729	0	0	0.0122116	0	0	0	0	0.0181771	0	0.0305817	0	0.0164055	0.00924877	0	0.528355	0.450505	0.335639	0.551066	0.195791	0.0741856	0.292624	0.43019	0.398882	0.307002	0.314403	0.195106	0	0.0129981	0	0
-7.37448	3.81764	138.588	4.38175e-19	8.5707e-16	Mir669i	100316668	2	10517604	10517730	0	0	0.0172176	0	0.0193815	0	0	0.0263457	0	0.042775	0	0.108472	0	0.038332	0	0	0	0	0	0	0.00958296	0.00898956	0.0175451	0.0259885	0.40293	0.546633	0.429619	0.445987	0.150967	0.171076	0.332722	0.202976	0.338955	0.373808	0.181222	0.14935	0	0	0.016628	0
-6.3588	1.51577	102.254	2.87104e-14	2.15991e-11	Mir669h	100316831	2	10518155	10518279	0	0	0	0	0	0	0	0	0	0.0757217	0	0	0	0	0	0	0	0	0	0	0	0	0	0	0.484058	0.447149	0.484939	0.255153	0.609708	0.149867	0.431757	0.281095	0.338955	0.599793	0.46394	0.535477	0	0	0	0
-1.45886	3.5527	26.614	1.68625e-06	0.000540706	Platr4	78706	3	41484024	41493192	0.369799	0.179508	0.348415	0.49758	0.339445	0.373331	0.305576	0.21519	0.593209	0.511532	0.62942	0.500098	0.322474	0.190832	0.139978	0.442056	0.362451	0.196386	0.340234	0.323618	0.21635	0.27943	0.224582	0.284628	0.671006	0.59723	0.506687	0.500702	0.488405	0.365017	0.367176	0.648297	0.487773	0.41683	0.549066	0.493567	0.368211	0.340888	0.33261	0.331063
-1.71236	2.22768	26.8879	1.51529e-06	0.000502358	Gm6069		3	41485733	41486195	0.334145	0.319904	0.239744	0.273932	0.218931	0.408533	0.207152	0.194805	0.46644	0.510894	0.475966	0.576755	0.379632	0.320502	0.488811	0.291303	0.205348	0.238563	0.204989	0.340046	0.267613	0.20542	0.33925	0.308423	0.532545	0.562695	0.606402	0.463384	0.421638	0.383548	0.476925	0.452692	0.537518	0.49493	0.368762	0.354526	0.240678	0.208476	0.344718	0.251447
-2.4207	8.44156	105.957	1.89084e-16	2.17558e-13	Jade1	269424	3	41555731	41616864	0.171266	0.179681	0.220768	0.192145	0.13004	0.121416	0.105008	0.12448	0.283552	0.252657	0.544036	0.400943	0.165048	0.127471	0.270177	0.173747	0.10436	0.0879857	0.0906504	0.121117	0.111582	0.131566	0.101718	0.120537	0.535461	0.503353	0.526613	0.534319	0.451513	0.452257	0.475372	0.488643	0.46107	0.458621	0.467434	0.438149	0.185849	0.178109	0.216394	0.235374
-5.23064	3.22291	65.6004	5.45296e-12	2.96277e-09	Gm31266		3	41562279	41563698	0.0413066	0	0.122926	0.0314998	0	0	0.0622266	0	0.389969	0.205537	0.75741	0.267403	0.0956515	0	0.256085	0.261093	0.019865	0	0	0	0.0188115	0	0.0281125	0.0266542	0.588087	0.685292	0.642009	0.648483	0.37938	0.260668	0.248651	0.43074	0.34465	0.311424	0.330903	0.260355	0	0	0.131572	0.0734842
-1.68297	8.76714	101.59	5.01173e-16	5.44608e-13	Gab1	14388	8	80764438	80880519	0.257898	0.254156	0.22276	0.273868	0.249815	0.213671	0.222631	0.19354	0.517448	0.386452	0.474091	0.459324	0.209124	0.2277	0.204259	0.216748	0.206997	0.188776	0.211164	0.175579	0.215569	0.191406	0.17535	0.207251	0.466896	0.482707	0.498799	0.483487	0.481529	0.48232	0.497122	0.51495	0.492321	0.415771	0.519435	0.494571	0.344797	0.243123	0.258938	0.23585
-1.67785	6.67969	33.0446	1.47876e-07	5.35641e-05	Sall1	58198	8	89027235	89044162	0.256765	0.231157	0.286352	0.266048	0.181913	0.144147	0.14112	0.144512	0.37875	0.12063	0.238832	0.196769	0.26232	0.286324	0.197873	0.24755	0.0979953	0.134162	0.173051	0.163978	0.221558	0.203294	0.143272	0.161663	0.489221	0.42268	0.592218	0.568974	0.354655	0.33388	0.424156	0.368432	0.338335	0.392697	0.427245	0.316347	0.263564	0.315202	0.253205	0.245819
-3.66687	1.31972	26.1049	2.1818e-06	0.000688321	Gm12569	622699	11	51220473	51235053	0	0.17291	0.296004	0.273932	0.291334	0.147251	0.207152	0	0.38068	0.179297	0.161783	0.350966	0	0	0.323461	0.242251	0.279341	0	0.204989	0	0	0	0	0	0.21964	0.485492	0.484939	0.715269	0.480719	0.552373	0.515442	0.682593	0.535683	0.784086	0.700308	0.40886	0.06816	0.119296	0	0.487639
-2.16661	6.69351	66.4529	3.41633e-12	1.9654e-09	Smoc1	64075	12	81026808	81186414	0.137649	0.176757	0.109928	0.127813	0.246663	0.192686	0.169233	0.234083	0.204108	0.198417	0.518376	0.284618	0.14145	0.086643	0.138729	0.0648369	0.203223	0.126223	0.179868	0.191664	0.138662	0.200443	0.138603	0.221552	0.500034	0.496749	0.508206	0.483182	0.482451	0.504268	0.497778	0.513075	0.490294	0.46812	0.469681	0.468838	0.243879	0.145829	0.089619	0.0816092
-5.66783	9.94115	138.003	2.78686e-19	6.05677e-16	Slc38a4	69354	15	96994820	97055956	0.00480597	0.00731171	0.00574852	0.0117375	0.022782	0.028425	0.0279116	0.0248694	0.0876419	0.0539165	0.267928	0.0864377	0.00642465	0.00365138	0.00549692	0.00544395	0.0535403	0.00768543	0.0154907	0.0215134	0.0924631	0.0572933	0.0092887	0.0203146	0.247457	0.0905441	0.336057	0.412634	0.228958	0.389991	0.405917	0.452142	0.362575	0.436149	0.469817	0.450752	0.006308	0.00608284	0.0150685	0.00996463
1.87491	8.6007	21.195	1.49251e-05	0.00423094	Gm27483		7	142576853	142576923	0.99426	0.992594	0.988635	0.99157	0.980546	0.954987	0.995777	0.990786	0.905522	0.961908	0.987022	0.991186	0.99842	0.989032	0.990315	0.990678	0.995267	0.992158	0.991691	0.993846	0.99438	0.994173	0.993683	0.993608	0.979214	0.98687	0.93511	0.965981	0.954112	0.953421	0.94885	0.957854	0.977686	0.965268	0.961869	0.938645	0.991948	0.997105	0.988772	0.986784
2.10187	12.9184	26.8293	1.5503e-06	0.000505399	H19	14955	7	142575529	142578143	0.992863	0.991282	0.990121	0.990279	0.976458	0.945288	0.99048	0.98844	0.902885	0.971204	0.984079	0.990198	0.994679	0.992124	0.987638	0.991846	0.990882	0.994522	0.992727	0.992201	0.992731	0.993268	0.993697	0.991354	0.973769	0.985422	0.943272	0.957902	0.95657	0.942573	0.956045	0.953326	0.971394	0.959616	0.9593	0.932118	0.994593	0.995142	0.990223	0.988777
2.12275	9.72718	22.8643	7.51959e-06	0.00219527	Gm27786		7	142577849	142577918	0.993115	0.99494	0.989182	0.991088	0.971886	0.942475	0.993346	0.987821	0.909102	0.976941	0.983112	0.991225	0.995748	0.994866	0.989506	0.99223	0.988946	0.994714	0.991225	0.994424	0.991342	0.992325	0.995879	0.989753	0.973096	0.986915	0.949596	0.956145	0.956775	0.935953	0.956008	0.951466	0.968804	0.952908	0.963941	0.928826	0.99525	0.993857	0.988617	0.987315
2.39991	6.10924	19.0618	3.65416e-05	0.00992713	Ascl2	17173	7	142966829	142969264	0.981828	0.965999	0.991965	0.993228	0.985385	0.995381	1	0.993844	0.937355	0.932903	0.983403	0.958113	0.950096	0.977096	0.992603	0.988983	0.985696	0.914997	1	0.992828	0.990115	0.888069	0.984412	0.997597	0.755261	0.778258	0.835962	0.873873	0.746698	0.834429	0.852988	0.936287	0.740866	0.821791	0.836452	0.813766	0.976204	0.922601	0.993402	0.991708
2.59923	8.83187	25.5975	2.51414e-06	0.000768384	Cdkn1c	12577	7	143458339	143461050	0.991736	0.993742	0.995401	0.99646	0.995702	0.9951	0.990894	0.994562	0.99708	0.974516	0.998028	0.984469	0.973537	0.994596	0.993873	0.997238	0.991287	0.992888	0.997491	0.999012	0.997518	0.989861	0.996491	0.996306	0.883231	0.98508	0.991278	0.959412	0.981674	0.983011	0.993815	0.996134	0.989062	0.98612	0.985115	0.989742	0.995277	0.995877	0.994155	0.997705
2.91255	8.25263	60.4495	1.90893e-11	9.82596e-09	Phlda2	22113	7	143501545	143503150	0.954752	0.921481	0.938615	0.915415	0.966307	0.979437	0.962813	0.981319	0.947351	0.880051	0.954496	0.888459	0.831324	0.932179	0.930384	0.937763	0.978074	0.981907	0.979836	0.974059	0.975689	0.95917	0.975407	0.968138	0.694557	0.706079	0.740761	0.73635	0.812072	0.825878	0.839135	0.837064	0.786523	0.81068	0.821126	0.845519	0.928827	0.906707	0.950749	0.955678
3.19538	5.60392	24.4829	3.91499e-06	0.00117811	Mirg	100040724	12	109729764	109749460	0.990191	1	0.996656	0.991634	0.921768	0.926407	0.909808	0.967552	0.962823	0.996261	0.98991	0.988217	0.944856	1	0.988761	0.98244	0.877174	0.861329	0.924345	1	0.953336	0.914535	0.966389	0.98082	0.637567	0.6761	0.784634	0.802798	0.946238	0.96346	0.93057	0.970363	0.879244	0.924687	0.920179	0.92997	0.983268	1	1	1
-6.59944	-0.150048	17.2222	0.000107766	0.0284853	Gm20605		5	137629175	137642899	#NUM!	1	#NUM!	#NUM!	1	0	#NUM!	#NUM!	#NUM!	#NUM!	0	1	#NUM!	#NUM!	0	0	#NUM!	1	0	1	#NUM!	#NUM!	#NUM!	#NUM!	#NUM!	#NUM!	1	1	#NUM!	0.679017	#NUM!	#NUM!	#NUM!	1	#NUM!	1	0	#NUM!	#NUM!	#NUM!
										0	0.1	0.2	0.3	0.4	0.5	0.6	0.7	0.8	0.9	1
1.87491	8.6007	21.195	1.49251e-05	0.00423094	Gm27483		7	142576853	142576923	0.99426	0.992594	0.988635	0.99157	0.980546	0.954987	0.995777	0.990786	0.905522	0.961908	0.987022	0.991186	0.99842	0.989032	0.990315	0.990678	0.995267	0.992158	0.991691	0.993846	0.99438	0.994173	0.993683	0.993608	0.979214	0.98687	0.93511	0.965981	0.954112	0.953421	0.94885	0.957854	0.977686	0.965268	0.961869	0.938645	0.991948	0.997105	0.988772	0.986784
2.10187	12.9184	26.8293	1.5503e-06	0.000505399	H19	14955	7	142575529	142578143	0.992863	0.991282	0.990121	0.990279	0.976458	0.945288	0.99048	0.98844	0.902885	0.971204	0.984079	0.990198	0.994679	0.992124	0.987638	0.991846	0.990882	0.994522	0.992727	0.992201	0.992731	0.993268	0.993697	0.991354	0.973769	0.985422	0.943272	0.957902	0.95657	0.942573	0.956045	0.953326	0.971394	0.959616	0.9593	0.932118	0.994593	0.995142	0.990223	0.988777
2.12275	9.72718	22.8643	7.51959e-06	0.00219527	Gm27786		7	142577849	142577918	0.993115	0.99494	0.989182	0.991088	0.971886	0.942475	0.993346	0.987821	0.909102	0.976941	0.983112	0.991225	0.995748	0.994866	0.989506	0.99223	0.988946	0.994714	0.991225	0.994424	0.991342	0.992325	0.995879	0.989753	0.973096	0.986915	0.949596	0.956145	0.956775	0.935953	0.956008	0.951466	0.968804	0.952908	0.963941	0.928826	0.99525	0.993857	0.988617	0.987315
2.39991	6.10924	19.0618	3.65416e-05	0.00992713	Ascl2	17173	7	142966829	142969264	0.981828	0.965999	0.991965	0.993228	0.985385	0.995381	1	0.993844	0.937355	0.932903	0.983403	0.958113	0.950096	0.977096	0.992603	0.988983	0.985696	0.914997	1	0.992828	0.990115	0.888069	0.984412	0.997597	0.755261	0.778258	0.835962	0.873873	0.746698	0.834429	0.852988	0.936287	0.740866	0.821791	0.836452	0.813766	0.976204	0.922601	0.993402	0.991708
2.59923	8.83187	25.5975	2.51414e-06	0.000768384	Cdkn1c	12577	7	143458339	143461050	0.991736	0.993742	0.995401	0.99646	0.995702	0.9951	0.990894	0.994562	0.99708	0.974516	0.998028	0.984469	0.973537	0.994596	0.993873	0.997238	0.991287	0.992888	0.997491	0.999012	0.997518	0.989861	0.996491	0.996306	0.883231	0.98508	0.991278	0.959412	0.981674	0.983011	0.993815	0.996134	0.989062	0.98612	0.985115	0.989742	0.995277	0.995877	0.994155	0.997705
2.91255	8.25263	60.4495	1.90893e-11	9.82596e-09	Phlda2	22113	7	143501545	143503150	0.954752	0.921481	0.938615	0.915415	0.966307	0.979437	0.962813	0.981319	0.947351	0.880051	0.954496	0.888459	0.831324	0.932179	0.930384	0.937763	0.978074	0.981907	0.979836	0.974059	0.975689	0.95917	0.975407	0.968138	0.694557	0.706079	0.740761	0.73635	0.812072	0.825878	0.839135	0.837064	0.786523	0.81068	0.821126	0.845519	0.928827	0.906707	0.950749	0.955678
3.19538	5.60392	24.4829	3.91499e-06	0.00117811	Mirg	100040724	12	109729764	109749460	0.990191	1	0.996656	0.991634	0.921768	0.926407	0.909808	0.967552	0.962823	0.996261	0.98991	0.988217	0.944856	1	0.988761	0.98244	0.877174	0.861329	0.924345	1	0.953336	0.914535	0.966389	0.98082	0.637567	0.6761	0.784634	0.802798	0.946238	0.96346	0.93057	0.970363	0.879244	0.924687	0.920179	0.92997	0.983268	1	1	1
-6.59944	-0.150048	17.2222	0.000107766	0.0284853	Gm20605		5	137629175	137642899	#NUM!	1	#NUM!	#NUM!	1	0	#NUM!	#NUM!	#NUM!	#NUM!	0	1	#NUM!	#NUM!	0	0	#NUM!	1	0	1	#NUM!	#NUM!	#NUM!	#NUM!	#NUM!	#NUM!	1	1	#NUM!	0.679017	#NUM!	#NUM!	#NUM!	1	#NUM!	1	0	#NUM!	#NUM!	#NUM!
[truncated: 104 more columns]

## Sheet: ZygEffect_12SOM.Imprint
logFC	logCPM	F	PValue	FDR	mgi_symbol	entrezgene_id	chromosome_name	start_position	end_position	Control_Ratio	Control_Ratio.1	Control_Ratio.2	Control_Ratio.3	Control_Ratio.4	Control_Ratio.5	Control_Ratio.6	Control_Ratio.7	MAT_MUT_Ratio	MAT_MUT_Ratio.1	MAT_MUT_Ratio.2	MAT_MUT_Ratio.3	MAT_WT_Ratio	MAT_WT_Ratio.1	MAT_WT_Ratio.2	MAT_WT_Ratio.3	PAT_HAPLO_Ratio	PAT_HAPLO_Ratio.1	PAT_HAPLO_Ratio.2	PAT_HAPLO_Ratio.3	Mat_HAPLO_Ratio	Mat_HAPLO_Ratio.1	Mat_HAPLO_Ratio.2	Mat_HAPLO_Ratio.3	HOMO_SIX_Ratio	HOMO_SIX_Ratio.1	HOMO_SIX_Ratio.2	HOMO_SIX_Ratio.3	HOMO_TWELVE_Ratio	HOMO_TWELVE_Ratio.1	HOMO_TWELVE_Ratio.2	HOMO_TWELVE_Ratio.3	HOMO_SIX_Ratio.4	HOMO_SIX_Ratio.5	HOMO_SIX_Ratio.6	HOMO_SIX_Ratio.7	WT_SIX_Ratio	WT_SIX_Ratio.1	WT_SIX_Ratio.2	WT_SIX_Ratio.3
-6.15651	10.7602	238.126	5.17577e-26	1.01238e-21	Sfmbt2	353282	2	10370510	10595253	0.00601426	0.00432087	0.00276244	0.00334865	0.00599363	0.00405994	0.00252854	0.00389537	0.0191536	0.0157545	0.00812301	0.0245717	0.0168614	0.00866696	0.00580465	0.00494301	0.00278723	0.00585534	0.00205899	0.00411115	0.00552888	0.00504534	0.00480408	0.0044749	0.442306	0.471566	0.363112	0.426582	0.250634	0.122263	0.405586	0.36728	0.380609	0.388507	0.315267	0.297544	0.00423465	0.00517905	0.00607827	0.00693127
-4.77677	3.0491	45.3099	2.76401e-09	4.14809e-06	Gm22072		2	10465287	10465407	0	0	0	0	0	0	0	0.0285395	0.0223602	0.114539	0	0	0	0	0	0	0	0	0	0	0	0.0703436	0.0293164	0.0231035	0.552468	0.45496	0.352788	0.514513	0.359297	0.154237	0.397681	0.58027	0.487061	0.350453	0.224704	0.283271	0	0.0287782	0	0.0173197
-5.35889	1.43532	17.956	8.46932e-05	0.0254861	Mir466m	100526481	2	10466663	10466746	0	0	0	0	0	0	0	0	0	0	0	0.139582	0	0	0	0	0	0	0	0	0	0	0	0	0.384792	0.767583	0.46884	0.458825	0.115187	0.209129	0.680253	1	0.231727	0.22056	0.280295	0.237364	0	0	0	0
-5.49521	3.66984	43.974	4.45721e-09	5.81221e-06	Mir466f-1	100124486	2	10466944	10467037	0	0	0	0	0	0	0	0	0	0.0656141	0	0	0.055071	0	0	0	0	0.052169	0	0	0	0	0	0.0144446	0.468625	0.557158	0.387664	0.468254	0.197537	0.193802	0.291277	0.283744	0.275837	0.390765	0.252165	0.213913	0	0	0	0.0734842
-7.31532	3.78252	65.9979	6.21972e-12	3.38643e-08	Mir669f	100316667	2	10467229	10467349	0	0	0	0	0	0.0126294	0	0	0.0204962	0	0.0394457	0.162949	0	0	0.0195322	0	0	0	0.0475332	0	0	0	0	0	0.426948	0.550902	0.60941	0.508023	0.229322	0.152264	0.231394	0.37397	0.342186	0.36618	0.21052	0.314811	0	0.0226038	0	0
-4.60343	3.35243	62.4694	2.92068e-11	9.52142e-08	Mir669e	100316806	2	10467495	10467613	0	0	0	0	0	0	0	0	0.0703316	0.0265825	0	0	0	0	0	0	0	0	0	0	0	0	0.0157913	0	0.43045	0.477029	0.244511	0.365356	0.297305	0.174607	0.265608	0.334128	0.290883	0.361408	0.310675	0.266876	0	0	0	0
-4.76284	3.32843	52.0092	3.43466e-10	5.5985e-07	Mir669b	735255	2	10467790	10467886	0.0351752	0	0	0	0.0213992	0	0	0	0.0245972	0	0.0537177	0.0389757	0	0	0	0	0	0	0	0.0251158	0	0	0	0	0.360172	0.42515	0.265851	0.414014	0.316412	0.128088	0.515442	0.624999	0.397321	0.353206	0.277796	0.37525	0	0	0	0.0202708
-7.57358	2.98277	76.0987	1.30259e-12	1.27393e-08	Gm23578		2	10468069	10468172	0	0	0	0	0	0	0	0	0.0447372	0	0	0.0464091	0.028888	0	0	0	0	0	0	0	0	0	0	0	0.417741	0.543013	0.444093	0.547754	0.381632	0.14474	0.586489	0.518133	0.338955	0.295758	0.214642	0.131415	0	0	0	0.0433564
-5.5235	2.43937	19.3972	3.71668e-05	0.0119177	Mir669d	100316664	2	10468343	10468463	0	0	0.0864277	0	0	0	0	0	0	0	0	0	0	0	0	0	0	0	0	0	0	0	0.021381	0	0.484058	0.509315	0.577203	0.64021	0.355404	0	0.290342	0.0855062	0.246022	0.244849	0.320685	0.310855	0	0	0.0951965	0.0796326
-3.22167	2.82338	20.9866	2.27243e-05	0.00779803	Mir466f-2	100124445	2	10468675	10468768	0	0	0	0	0	0	0	0	0.115929	0	0	0.0464091	0	0	0.0319207	0	0	0	0	0	0	0	0	0	0.507879	0.287953	0.405682	0.429753	0.147904	0.0458726	0.387102	0.237375	0.364792	0.474301	0.33626	0.310855	0	0	0	0
-6.21583	2.57237	30.6781	4.52148e-07	0.0002948	Mir669l	100316815	2	10468971	10469068	0.0559302	0	0	0	0	0	0	0	0.0895418	0	0	0.139582	0.0910757	0	0	0	0	0	0	0	0	0	0	0	0.355622	0.485492	0.290456	0.429753	0.302621	0.0555007	0.381129	0.401928	0.299375	0.35534	0.365875	0.341557	0	0	0.0316196	0
-4.5742	2.70917	43.8803	5.06554e-09	6.19263e-06	Mir669d-2	100526550	2	10471644	10471729	0	0	0	0	0.035406	0	0	0	0.0895418	0	0.0537177	0	0	0	0	0	0	0	0	0	0	0	0	0	0.529598	0.52842	0.438238	0.389556	0.319105	0.174607	0.422405	0.502985	0.261243	0.401687	0.370482	0.313417	0	0	0.0452053	0
-7.12325	2.76889	52.84	3.22887e-10	5.5985e-07	Mir297a-2	723945	2	10472254	10472343	0	0	0	0	0.0331237	0	0	0.0586612	0.0393652	0	0	0	0.114893	0	0.0342043	0	0	0	0	0	0	0	0	0	0.494692	0.471231	0.469343	0.567222	0.458342	0.190315	0.476925	0.196386	0.344125	0.373669	0.348158	0.187355	0	0	0	0
-5.64356	1.3145	17.7591	7.05472e-05	0.0217592	Gm26073		2	10473351	10473477	0.486626	0	0	0	0	0	0.0946213	0	0	0.329557	0	0	0	0	0	0	0	0	0	0	0	0.114467	0	0	0.808499	1	0.628906	0.361112	0.454496	0.209129	0.515442	0.5891	0.277752	0.22056	0.206122	0.0689924	0	0	0	0
-5.91638	1.69403	23.0562	1.20267e-05	0.00461261	Mir467c	100124487	2	10473931	10474027	0	0	0	0	0	0	0	0	0	0	0	0	0.322474	0	0.0639348	0	0	0	0	0	0	0	0	0	0.308802	0.266284	0.224625	0.585587	0.533931	0.283998	1	0.600857	0.430407	0.41634	0.372435	0.475833	0	0	0	0
-5.87887	2.2674	21.0582	1.64584e-05	0.00607409	Mir669k	100316663	2	10475300	10475426	0	0	0	0	0.0759738	0	0	0	0	0.109439	0.0968426	0	0	0	0	0.0740094	0	0.0581249	0	0.0856585	0	0.0382519	0	0.0335237	0.621478	0.629422	0.63617	0.508898	0.129511	0.186951	0.389589	0.138888	0.347151	0.216721	0.198253	0.152851	0.0596138	0	0	0
-5.99704	2.00367	24.2505	7.10559e-06	0.00302142	Gm26491		2	10475500	10475620	0	0	0	0	0	0	0	0	0	0	0.074434	0	0	0.0998958	0	0	0	0	0	0	0	0	0	0	0.572702	0.435679	0.196204	0.556747	0.234486	0.105165	0.463601	0.349649	0.301576	0.297117	0.121631	0.0939954	0	0	0	0
-4.71514	1.90574	23.2992	1.01081e-05	0.00411903	Gm25701		2	10477710	10477836	0	0	0	0	0	0	0	0	0	0	0	0	0	0	0	0	0	0	0	0	0	0	0.0732068	0	0.39096	0.531029	0.385628	0.30537	0.238059	0.131268	0.515442	1	0.394892	0.315603	0.418267	0.307781	0	0	0	0
-5.52201	2.89441	17.7375	7.11959e-05	0.0217592	Mir669j	100316770	2	10477910	10478030	0	0	0	0	0	0.0211286	0	0	0.0492147	0.042775	0	0.447858	0.0433637	0	0	0	0	0	0	0	0	0	0	0	0.581577	0.619062	0.668604	0.525136	0.0716199	0.0270809	0.2713	0.163532	0.244625	0.165019	0.0675621	0.153659	0	0	0	0
-6.75225	1.00094	22.592	1.19497e-05	0.00461261	Mir467a-2	100124624	2	10478798	10478880	0	0	0	0	0	0	0	0	0	0	0	0	0	0	0	0	0	0	0	0	0	#NUM!	0.33925	0	0	0.361497	0.211981	0.299817	0.675632	0.345917	1	0.928074	0.869551	0.453567	0.721944	0.54759	0	0	0	0
-6.00381	2.77632	33.0571	2.46967e-07	0.000178914	Gm26156		2	10499204	10499326	0.0528139	0	0	0	0	0	0	0	0.0532086	0.042775	0	0	0	0	0	0	0	0	0	0	0	0.0246016	0	0	0.509497	0.653645	0.337278	0.61339	0.224382	0.127317	0.309339	0.196386	0.250603	0.321719	0.176869	0.276529	0	0	0	0
-4.9695	3.71167	38.3112	2.24463e-08	2.19525e-05	Gm23571		2	10499763	10499889	0.0570523	0.0382307	0.0400649	0.108154	0.0250502	0	0	0	0.0158668	0.0138498	0.0375282	0.0314255	0.0744542	0.008503	0.0242351	0.0641145	0.0215193	0	0	0	0	0.0215286	0.0176963	0	0.33388	0.350313	0.273576	0.287612	0.430985	0.154237	0.549818	0.538908	0.451686	0.485841	0.443527	0.405898	0.032845	0.0107812	0	0.0391907
-5.36828	3.7437	63.9564	6.92522e-12	3.38643e-08	Gm25316		2	10499966	10500083	0	0	0	0	0.0168408	0.0191736	0	0	0.0302763	0	0	0.0335948	0.015878	0	0	0	0.0156534	0	0	0	0	0	0.0138715	0	0.351659	0.520417	0.385628	0.338877	0.350094	0.105165	0.451146	0.529221	0.411886	0.380333	0.423845	0.266386	0	0	0	0
-6.20192	3.53003	42.2735	8.91044e-09	1.02522e-05	Gm23988		2	10501633	10501754	0.0184244	0	0	0	0.0554711	0	0	0.0193902	0.0807224	0	0	0.0295194	0	0.0124218	0	0	0	0	0	0	0	0	0	0.0676858	0.282351	0.2922	0.249799	0.271968	0.478211	0.199279	0.421771	0.385461	0.560062	0.390181	0.447933	0.474917	0	0	0	0
-4.90874	3.64819	33.4634	1.26861e-07	0.000112791	Gm25673		2	10502191	10502317	0	0.0214097	0	0.02422	0	0	0.015359	0	0.0393652	0.0468521	0	0	0.0280372	0	0.0456296	0	0.024887	0	0	0	0	0	0.0235915	0	0.501603	0.614921	0.408048	0.60621	0.156812	0.0527337	0.210069	0.190424	0.34201	0.411197	0.264043	0.227452	0.0166967	0	0	0
-6.17248	2.60184	26.3233	3.04797e-06	0.00149924	Gm25753		2	10502391	10502511	0	0	0	0	0	0	0	0	0	0	0	0	0	0.0315045	0	0	0.0356017	0	0	0	0	0	0.0244335	0	0.632358	0.633692	0.419223	0.434256	0.384568	0	0.539193	0	0.338955	0.397688	0.177879	0.223715	0	0	0	0
-4.04806	3.61787	32.3612	1.90157e-07	0.000161716	Mir466p	100526497	2	10506006	10506094	0	0	0	0.0205298	0	0.05171	0.0946213	0	0.0690963	0	0	0	0.0173227	0	0	0	0.026146	0.0147533	0	0.057154	0.0272194	0	0.0162924	0.0442043	0.454145	0.418645	0.371244	0.409727	0.257694	0.153491	0.440164	0.468017	0.467049	0.32195	0.216883	0.24729	0.0153491	0.0186108	0.037957	0
-7.1292	3.01163	63.9367	1.80927e-11	7.07785e-08	Gm22051		2	10506555	10506681	0	0	0	0	0.0302034	0	0	0	0	0	0	0	0	0.053569	0	0	0	0	0	0	0	0	0	0	0.410017	0.356939	0.337278	0.510733	0.38892	0.209129	0.515442	0.283744	0.462138	0.404197	0.441123	0.482863	0	0	0	0.0183199
-5.99951	2.49176	33.4822	2.41137e-07	0.000178914	Mir466	723922	2	10507918	10507990	0	0	0	0	0	0	0	0	0.0820697	0	0	0.0464091	0	0	0	0	0	0	0	0	0	0	0	0	0.416848	0.614247	0.484939	0.507814	0.37615	0	0.285153	0.300751	0.410846	0.482886	0.434805	0.0705564	0	0	0	0
-6.73665	2.58784	42.1337	1.26722e-08	1.30457e-05	Gm22091		2	10508453	10508579	0.025655	0	0	0	0	0	0.0474074	0	0.0703316	0.0757217	0	0	0	0	0	0	0	0	0	0	0	0.068784	0	0	0.337445	0.40263	0.467731	0.422864	0.368374	0.0620081	0.347202	0.518133	0.338955	0.268042	0.403007	0.120113	0	0	0	0
-6.69582	2.18678	45.0248	1.01861e-08	1.10689e-05	Mir669c	735273	2	10509296	10509404	0	0	0	0	0	0	0	0	0	0	0	0	0	0	0	0	0	0	0	0	0	0.128714	0	0	0.252478	0.274017	0.360986	0.553924	0.384568	0.184774	0.424106	0.594529	0.483561	0.564641	0.415407	0.205951	0	0	0	0
-6.90958	2.42035	21.3413	1.93753e-05	0.00692328	Gm22239		2	10510461	10510563	0	0	0	0	0	0	0	0	0.0204962	0	0	0	0	0	0	0	0	0	0	0	0	0	0	0	0.122031	0.118788	0.107297	0.0830569	0.316412	0.232072	0.769753	0.790067	0.679926	0.624075	0.67502	0.608795	0	0.0316609	0	0
-5.84216	2.95339	32.3579	2.2525e-07	0.000178719	Mir297b	735281	2	10511667	10511775	0	0	0.0315915	0	0.0270265	0.0295714	0	0	0.0953279	0	0	0	0.03815	0	0	0.0436764	0	0	0	0	0.0206913	0	0	0.018906	0.484058	0.56152	0.377048	0.522162	0.106364	0.0251492	0.375484	0.211864	0.303545	0.319438	0.198943	0.268025	0	0.0452635	0	0
-5.54306	2.18213	19.4464	4.09409e-05	0.0129162	Mir669m-1	100316701	2	10512790	10512887	0	0	0	0	0	0	0	0	0	0	0	#NUM!	0	0	0	0	0	0.0423947	0	0	0	0	0	0	0.63927	0.751215	0.349809	0.552857	0.277297	0.0620081	0	0.573393	0.361349	0.270371	0.266591	0.180375	0	0	0	0
-6.67774	3.33925	46.2802	2.96898e-09	4.14809e-06	Mir669o	100316702	2	10514300	10514395	0	0	0	0	0	0	0	0	0	0.0383279	0	0.0975955	0	0.0188884	0	0	0	0	0	0.0374318	0	0	0	0	0.448461	0.514087	0.35513	0.429753	0.172385	0.107298	0.466956	0.232705	0.39997	0.265188	0.330349	0.18188	0	0.0237354	0	0
-5.45209	2.21964	25.4807	4.03208e-06	0.00183413	Mir297a-3	100124482	2	10515820	10515921	0	0	0	0	0	0	0	0	0.123189	0	0	0	0	0	0	0	0	0	0	0	0	0	0	0	0.384792	0.653645	0.526673	0.56111	0.198696	0.0810032	0.313133	0.287355	0.204061	0.151009	0.158836	0.129079	0.0596138	0	0	0
-4.70649	2.52667	28.384	1.17121e-06	0.000654538	Mir466l	100316769	2	10516097	10516217	0	0	0	0	0	0.0689053	0	0	0	0	0	0	0.151452	0	0	0	0	0	0	0	0	0	0.0341981	0	0.61356	0.653645	0.367699	0.385758	0.409788	0.149867	0.335051	0.479615	0.305317	0.297117	0.32402	0.35978	0	0	0	0
-4.0846	3.98898	29.1867	6.25091e-07	0.000394412	Mir297a-4	100124435	2	10517067	10517164	0	0	0	0.0192714	0	0.0112572	0	0	0.0124517	0	0.0261068	0	0	0.0124218	0	0	0	0	0.0132175	0	0	0	0.00950562	0	0.588416	0.640072	0.446059	0.551316	0.215749	0.0714301	0.321008	0.256848	0.28245	0.256978	0.164	0.145541	0	0	0	0
-5.51534	4.27419	57.7653	4.22143e-11	1.17959e-07	Gm24806		2	10517337	10517426	0.0103091	0	0	0	0.0250502	0.0115072	0	0.00969768	0.011178	0.0105729	0	0	0.0122116	0	0	0	0	0.0181771	0	0.0305817	0	0.0164055	0.00924877	0	0.528355	0.450505	0.335639	0.551066	0.195791	0.0741856	0.292624	0.43019	0.398882	0.307002	0.314403	0.195106	0	0.0129981	0	0
-4.63574	3.81764	30.5151	4.07401e-07	0.000284598	Mir669i	100316668	2	10517604	10517730	0	0	0.0172176	0	0.0193815	0	0	0.0263457	0	0.042775	0	0.108472	0	0.038332	0	0	0	0	0	0	0.00958296	0.00898956	0.0175451	0.0259885	0.40293	0.546633	0.429619	0.445987	0.150967	0.171076	0.332722	0.202976	0.338955	0.373808	0.181222	0.14935	0	0	0.016628	0
-4.69949	1.51577	24.8107	0.000100403	0.0293117	Mir669h	100316831	2	10518155	10518279	0	0	0	0	0	0	0	0	0	0.0757217	0	0	0	0	0	0	0	0	0	0	0	0	0	0	0.484058	0.447149	0.484939	0.255153	0.609708	0.149867	0.431757	0.281095	0.338955	0.599793	0.46394	0.535477	0	0	0	0
3.61026	1.92748	15.4752	0.000173747	0.04855	Cacnb2	12296	2	14603088	14987908	0.344954	0.211847	0.486136	0.629324	0.672722	0.846759	0.635281	0.698205	0	0.761626	0.426059	0.680431	0.432312	0.204631	0.51056	0.277268	0.805243	0.802877	0.424195	0.507514	0.919278	0.850469	0.754937	0.454291	0.867854	0.531029	0.911946	0.29512	0.183793	0.33593	0.0756367	0.277468	0.630885	0.205966	0.46394	0.509195	0.442092	0.486703	0.321323	0.681674
-0.702524	5.83206	19.4475	3.10272e-05	0.0102532	Cables2	252966	2	180258540	180273496	0.46829	0.418963	0.526833	0.474985	0.501506	0.481279	0.468715	0.495679	0.495836	0.487348	0.491105	0.507376	0.467715	0.490215	0.477328	0.492501	0.427789	0.526898	0.576691	0.49822	0.500672	0.519914	0.486324	0.525611	0.463099	0.412337	0.408888	0.433046	0.567429	0.603859	0.611991	0.59848	0.476564	0.485716	0.502701	0.433761	0.448386	0.518343	0.517186	0.413698
-2.38472	8.44156	51.4148	2.94475e-10	5.5985e-07	Jade1	269424	3	41555731	41616864	0.171266	0.179681	0.220768	0.192145	0.13004	0.121416	0.105008	0.12448	0.283552	0.252657	0.544036	0.400943	0.165048	0.127471	0.270177	0.173747	0.10436	0.0879857	0.0906504	0.121117	0.111582	0.131566	0.101718	0.120537	0.535461	0.503353	0.526613	0.534319	0.451513	0.452257	0.475372	0.488643	0.46107	0.458621	0.467434	0.438149	0.185849	0.178109	0.216394	0.235374
-6.89918	3.22291	30.2953	4.42155e-07	0.0002948	Gm31266		3	41562279	41563698	0.0413066	0	0.122926	0.0314998	0	0	0.0622266	0	0.389969	0.205537	0.75741	0.267403	0.0956515	0	0.256085	0.261093	0.019865	0	0	0	0.0188115	0	0.0281125	0.0266542	0.588087	0.685292	0.642009	0.648483	0.37938	0.260668	0.248651	0.43074	0.34465	0.311424	0.330903	0.260355	0	0	0.131572	0.0734842
3.36331	12.6114	26.0481	2.10508e-06	0.00111285	Peg10	170676	6	4747306	4760517	0.00411704	0.00304962	0.00186514	0.00237245	0.00261657	0.00304812	0.00227545	0.00281288	0.00316068	0.00115386	0.00361289	0.00160777	0.00206149	0.00346696	0.00231966	0.00396627	0.00253368	0.00216037	0.00175401	0.00210266	0.00228142	0.00205154	0.00316418	0.00286461	0.00331012	0.00298432	0.00318651	0.0033204	0.00300391	0.00360419	0.00285893	0.00292559	0.00239538	0.00351979	0.0042184	0.00250557	0.00270716	0.00252133	0.00276917	0.00432994
2.39148	8.25263	19.5603	2.9582e-05	0.00997627	Phlda2	22113	7	143501545	143503150	0.954752	0.921481	0.938615	0.915415	0.966307	0.979437	0.962813	0.981319	0.947351	0.880051	0.954496	0.888459	0.831324	0.932179	0.930384	0.937763	0.978074	0.981907	0.979836	0.974059	0.975689	0.95917	0.975407	0.968138	0.694557	0.706079	0.740761	0.73635	0.812072	0.825878	0.839135	0.837064	0.786523	0.81068	0.821126	0.845519	0.928827	0.906707	0.950749	0.955678
-1.76391	8.76714	55.6176	8.05787e-11	1.75124e-07	Gab1	14388	8	80764438	80880519	0.257898	0.254156	0.22276	0.273868	0.249815	0.213671	0.222631	0.19354	0.517448	0.386452	0.474091	0.459324	0.209124	0.2277	0.204259	0.216748	0.206997	0.188776	0.211164	0.175579	0.215569	0.191406	0.17535	0.207251	0.466896	0.482707	0.498799	0.483487	0.481529	0.48232	0.497122	0.51495	0.492321	0.415771	0.519435	0.494571	0.344797	0.243123	0.258938	0.23585
-1.74324	6.69351	21.9421	1.09642e-05	0.00437674	Smoc1	64075	12	81026808	81186414	0.137649	0.176757	0.109928	0.127813	0.246663	0.192686	0.169233	0.234083	0.204108	0.198417	0.518376	0.284618	0.14145	0.086643	0.138729	0.0648369	0.203223	0.126223	0.179868	0.191664	0.138662	0.200443	0.138603	0.221552	0.500034	0.496749	0.508206	0.483182	0.482451	0.504268	0.497778	0.513075	0.490294	0.46812	0.469681	0.468838	0.243879	0.145829	0.089619	0.0816092
-4.9774	9.94115	55.6497	7.97965e-11	1.75124e-07	Slc38a4	69354	15	96994820	97055956	0.00480597	0.00731171	0.00574852	0.0117375	0.022782	0.028425	0.0279116	0.0248694	0.0876419	0.0539165	0.267928	0.0864377	0.00642465	0.00365138	0.00549692	0.00544395	0.0535403	0.00768543	0.0154907	0.0215134	0.0924631	0.0572933	0.0092887	0.0203146	0.247457	0.0905441	0.336057	0.412634	0.228958	0.389991	0.405917	0.452142	0.362575	0.436149	0.469817	0.450752	0.006308	0.00608284	0.0150685	0.00996463
4.9441	3.59739	20.4142	2.23959e-05	0.00779803	Xlr4c	72891	X	73233688	73243130	0.978924	0.975876	1	0.97794	1	0.951656	1	1	1	0.941091	1	1	1	1	1	1	0.977484	1	1	1	0.973144	1	0.982285	1	0.987012	0.988852	0.968196	0.970966	0.919718	0.831537	1	1	0.988525	0.98214	1	0.984692	1	1	1	1
-0.702524	5.83206	19.4475	3.10272e-05	0.0102532	Cables2	252966	2	180258540	180273496	0.46829	0.418963	0.526833	0.474985	0.501506	0.481279	0.468715	0.495679	0.495836	0.487348	0.491105	0.507376	0.467715	0.490215	0.477328	0.492501	0.427789	0.526898	0.576691	0.49822	0.500672	0.519914	0.486324	0.525611	0.463099	0.412337	0.408888	0.433046	0.567429	0.603859	0.611991	0.59848	0.476564	0.485716	0.502701	0.433761	0.448386	0.518343	0.517186	0.413698
-2.38472	8.44156	51.4148	2.94475e-10	5.5985e-07	Jade1	269424	3	41555731	41616864	0.171266	0.179681	0.220768	0.192145	0.13004	0.121416	0.105008	0.12448	0.283552	0.252657	0.544036	0.400943	0.165048	0.127471	0.270177	0.173747	0.10436	0.0879857	0.0906504	0.121117	0.111582	0.131566	0.101718	0.120537	0.535461	0.503353	0.526613	0.534319	0.451513	0.452257	0.475372	0.488643	0.46107	0.458621	0.467434	0.438149	0.185849	0.178109	0.216394	0.235374
-6.89918	3.22291	30.2953	4.42155e-07	0.0002948	Gm31266		3	41562279	41563698	0.0413066	0	0.122926	0.0314998	0	0	0.0622266	0	0.389969	0.205537	0.75741	0.267403	0.0956515	0	0.256085	0.261093	0.019865	0	0	0	0.0188115	0	0.0281125	0.0266542	0.588087	0.685292	0.642009	0.648483	0.37938	0.260668	0.248651	0.43074	0.34465	0.311424	0.330903	0.260355	0	0	0.131572	0.0734842
3.36331	12.6114	26.0481	2.10508e-06	0.00111285	Peg10	170676	6	4747306	4760517	0.00411704	0.00304962	0.00186514	0.00237245	0.00261657	0.00304812	0.00227545	0.00281288	0.00316068	0.00115386	0.00361289	0.00160777	0.00206149	0.00346696	0.00231966	0.00396627	0.00253368	0.00216037	0.00175401	0.00210266	0.00228142	0.00205154	0.00316418	0.00286461	0.00331012	0.00298432	0.00318651	0.0033204	0.00300391	0.00360419	0.00285893	0.00292559	0.00239538	0.00351979	0.0042184	0.00250557	0.00270716	0.00252133	0.00276917	0.00432994
2.39148	8.25263	19.5603	2.9582e-05	0.00997627	Phlda2	22113	7	143501545	143503150	0.954752	0.921481	0.938615	0.915415	0.966307	0.979437	0.962813	0.981319	0.947351	0.880051	0.954496	0.888459	0.831324	0.932179	0.930384	0.937763	0.978074	0.981907	0.979836	0.974059	0.975689	0.95917	0.975407	0.968138	0.694557	0.706079	0.740761	0.73635	0.812072	0.825878	0.839135	0.837064	0.786523	0.81068	0.821126	0.845519	0.928827	0.906707	0.950749	0.955678
-1.76391	8.76714	55.6176	8.05787e-11	1.75124e-07	Gab1	14388	8	80764438	80880519	0.257898	0.254156	0.22276	0.273868	0.249815	0.213671	0.222631	0.19354	0.517448	0.386452	0.474091	0.459324	0.209124	0.2277	0.204259	0.216748	0.206997	0.188776	0.211164	0.175579	0.215569	0.191406	0.17535	0.207251	0.466896	0.482707	0.498799	0.483487	0.481529	0.48232	0.497122	0.51495	0.492321	0.415771	0.519435	0.494571	0.344797	0.243123	0.258938	0.23585
-1.74324	6.69351	21.9421	1.09642e-05	0.00437674	Smoc1	64075	12	81026808	81186414	0.137649	0.176757	0.109928	0.127813	0.246663	0.192686	0.169233	0.234083	0.204108	0.198417	0.518376	0.284618	0.14145	0.086643	0.138729	0.0648369	0.203223	0.126223	0.179868	0.191664	0.138662	0.200443	0.138603	0.221552	0.500034	0.496749	0.508206	0.483182	0.482451	0.504268	0.497778	0.513075	0.490294	0.46812	0.469681	0.468838	0.243879	0.145829	0.089619	0.0816092
-4.9774	9.94115	55.6497	7.97965e-11	1.75124e-07	Slc38a4	69354	15	96994820	97055956	0.00480597	0.00731171	0.00574852	0.0117375	0.022782	0.028425	0.0279116	0.0248694	0.0876419	0.0539165	0.267928	0.0864377	0.00642465	0.00365138	0.00549692	0.00544395	0.0535403	0.00768543	0.0154907	0.0215134	0.0924631	0.0572933	0.0092887	0.0203146	0.247457	0.0905441	0.336057	0.412634	0.228958	0.389991	0.405917	0.452142	0.362575	0.436149	0.469817	0.450752	0.006308	0.00608284	0.0150685	0.00996463
4.9441	3.59739	20.4142	2.23959e-05	0.00779803	Xlr4c	72891	X	73233688	73243130	0.978924	0.975876	1	0.97794	1	0.951656	1	1	1	0.941091	1	1	1	1	1	1	0.977484	1	1	1	0.973144	1	0.982285	1	0.987012	0.988852	0.968196	0.970966	0.919718	0.831537	1	1	0.988525	0.98214	1	0.984692	1	1	1	1
8.16147	-0.101343	17.0657	0.000106331	0.0301424	5430402O13Rik	73183	6	50566643	50594865	1	0	#NUM!	0	0	#NUM!	1	#NUM!	#NUM!	#NUM!	0	1	#NUM!	#NUM!	#NUM!	#NUM!	#NUM!	#NUM!	1	1	#NUM!	0	0	#NUM!	1	#NUM!	#NUM!	1	0	0	0	0	#NUM!	#NUM!	0	#NUM!	0	0.486703	#NUM!	#NUM!
10.5154	5.18417	25.6618	2.59363e-06	0.00133504	Atf6b	12915	17	34647146	34655074	0.467942	0.497894	0.474305	0.441095	0.510339	0.681212	0.605957	0.596314	0.40193	0.437662	0.502418	0.432612	0.40137	0.496372	0.488811	0.458365	0.563711	0.59675	0.581069	0.50437	0.525435	0.577353	0.485342	0.551528	1	1	1	1	0	0	0	0	0.00479154	0	0	0.0101675	0.366017	0.4168	0.352927	0.506876
7.08456	3.91542	24.6175	3.70997e-06	0.00176993	Stk19	54402	17	34823993	34836945	0.558278	0.552116	0.54309	0.485386	0.424857	0.537121	0.619824	0.578232	0.549935	0.539393	0.518901	0.345591	0.496156	0.529619	0.64499	0.39002	0.521421	0.536414	0.587753	0.571479	0.623561	0.520875	0.541072	0.473323	1	1	0.977669	1	0	0	0.0265511	0	0.00807327	0	0.0167405	0.0227828	0.569983	0.474814	0.542049	0.468189
7.03849	5.96491	25.0965	3.06594e-06	0.00149924	Ehmt2	110147	17	34898469	34914052	0.476504	0.429089	0.452517	0.404182	0.552809	0.555548	0.522127	0.550921	0.459837	0.453632	0.434351	0.440538	0.444267	0.421827	0.44081	0.401687	0.534195	0.54547	0.52346	0.56584	0.63089	0.558845	0.473066	0.608306	0.997032	0.997057	0.996274	1	0.0139248	0	0.004323	0.0169934	0.00245323	0.00304238	0.00310909	0.0103022	0.445545	0.451275	0.471799	0.47329
7.36705	3.75881	15.3504	0.000183677	0.049899	Slc44a4	70129	17	34914466	34930436	0.568319	0.814479	0.432492	0.361399	0.490711	0.629918	0.594015	0.536341	0.364554	0.525164	0.438979	0.481626	0.367779	0.361435	0.551455	0.470353	0.579514	0.667661	0.694099	0.340046	0.545199	0.508383	0.672531	0.706001	1	1	1	1	0.00754453	0	0	0	0.00603152	0.0195628	0.0117521	0	0.537509	0.467505	0.519735	0.467671
7.00715	4.83849	22.8695	7.50373e-06	0.00312283	Neu1	18010	17	34931253	34935953	0.459128	0.49825	0.539587	0.495384	0.469776	0.514601	0.505534	0.590083	0.516502	0.504512	0.456505	0.5047	0.618881	0.449449	0.560433	0.377236	0.530977	0.487275	0.524951	0.529717	0.520663	0.511693	0.498005	0.494154	1	1	1	0.990527	0	0	0.0253748	0	0	0	0	0.0170672	0.463188	0.499689	0.400893	0.655588
9.16536	7.8728	23.0191	7.06107e-06	0.00302142	1110038B12Rik	68763	17	34950238	34952471	0.586736	0.56365	0.575107	0.597177	0.42183	0.433528	0.426725	0.396888	0.58266	0.576893	0.592259	0.519578	0.579255	0.592521	0.587458	0.582867	0.414062	0.421203	0.428462	0.416043	0.406048	0.404788	0.400956	0.427998	1	0.998414	0.999033	0.998942	0.00281697	0.000978409	0	0	0	0.000761215	0.000871976	0.00144386	0.594346	0.599972	0.606064	0.547781
7.30024	2.97788	20.5564	1.94673e-05	0.00692328	Hspa1b	15511	17	34956436	34959238	0.244226	0.372712	0.27453	0.239198	0.506844	0.68766	0.735934	0.774135	0.424497	0.424403	0.491105	0.301969	0.240874	0.111727	0.364569	0.425657	0.407968	0.757721	0.902746	0.804766	0.842496	0.750518	0.697925	0.67545	0.929253	1	1	1	0	0	0.0482119	0	0.14597	0	0	0.037003	0.197772	0.0953126	0.258634	0.487639
6.51136	1.67636	17.1035	8.73648e-05	0.0258918	Msh5	17687	17	35028605	35046745	0.52514	0.446402	0.557794	0.452146	0.585606	0.408533	0.511027	0.631501	0.831007	0.450324	0	0.593501	0.487683	0.601492	0.560433	0.444212	0.306996	0.815239	0.407437	0.878251	0.307335	0.228073	0.606345	0.651941	1	1	1	1	0	0	0	0	0	0	0	0	0.387978	0.759652	0.654436	0.740613
9.99171	5.87604	35.3421	6.42472e-08	5.98417e-05	Clic1	114584	17	35049966	35058749	0.497416	0.440923	0.44141	0.507135	0.525475	0.526191	0.587522	0.539067	0.440335	0.448122	0.484698	0.456583	0.454656	0.532096	0.410181	0.405948	0.576382	0.508091	0.458641	0.54103	0.489091	0.505137	0.565552	0.552275	1	0.994567	0.991154	1	0	0.00327408	0	0	0.0120612	0	0.00755103	0	0.417871	0.480961	0.45387	0.442894
8.61352	4.87417	28.9944	6.72628e-07	0.000411144	Ddah2	51793	17	35059035	35062095	0.543903	0.416339	0.529062	0.543356	0.506844	0.520343	0.505346	0.509751	0.492077	0.52392	0.47204	0.490786	0.519973	0.485425	0.441317	0.462206	0.530831	0.558918	0.517922	0.484777	0.48889	0.537273	0.451718	0.474617	0.989241	1	1	1	0	0	0	0.00451648	0	0.0080408	0.0144167	0	0.484232	0.495682	0.486366	0.455103
8.09223	4.39942	27.6988	1.10616e-06	0.000636368	Abhd16a	193742	17	35089263	35102987	0.40444	0.450749	0.4579	0.589375	0.599185	0.517185	0.417666	0.53779	0.406232	0.452297	0.553724	0.554314	0.464646	0.473539	0.488811	0.440662	0.539877	0.531387	0.437588	0.502251	0.642923	0.450766	0.579805	0.509947	1	1	1	0.988213	0	0.0104665	0	0	0	0.00917894	0.0235829	0	0.425663	0.43039	0.474383	0.367987
8.32305	6.15313	28.1079	9.44691e-07	0.000559944	Csnk2b	13001	17	35116196	35122053	0.440176	0.46458	0.467373	0.449607	0.535916	0.535279	0.560893	0.463147	0.459478	0.472129	0.45508	0.461574	0.486529	0.444006	0.484897	0.453667	0.574986	0.512583	0.532156	0.533803	0.537044	0.470487	0.563525	0.544278	1	1	0.996772	0.996509	0.00765545	0.00328425	0	0	0	0.00592767	0.00692194	0	0.455977	0.423134	0.458584	0.422777
5.10572	4.22391	21.4961	1.31765e-05	0.00495639	Gpank1	81845	17	35121455	35124814	0.533004	0.468978	0.593837	0.576703	0.403631	0.440531	0.463782	0.516388	0.580695	0.506852	0.505671	0.493249	0.515794	0.461208	0.437232	0.616549	0.551409	0.529759	0.477582	0.521791	0.582716	0.469017	0.446101	0.462869	0.94792	0.981747	0.968196	0.990774	0.0354541	0.0593966	0.0259045	0	0.0104617	0.0122013	0.0123581	0.0450341	0.49783	0.543535	0.503611	0.540376
6.54423	1.5546	16.6533	0.000106215	0.0301424	Gm20522	105245272	17	35122738	35126440	0.680794	0.610582	0.654228	0.601455	0.339445	0.65095	0.625771	0.506959	0.567344	0.450324	0.491105	0.728019	0.517119	0.924606	0.656646	0.48956	0.314787	0.459032	0.300573	0.590621	0.67433	0.791307	0.506626	0.903525	1	1	1	1	0	0	0	0	0	0	0.147553	0	0.42515	0.43135	0.321323	0.363483
6.70471	3.56221	19.4154	3.14516e-05	0.0102532	D17H6S53E	114585	17	35126373	35128855	0.546095	0.416126	0.439126	0.502055	0.288192	0.457054	0.511027	0.554505	0.61872	0.505545	0.541178	0.531743	0.506676	0.503286	0.420092	0.350435	0.660521	0.464265	0.445117	0.526018	0.638811	0.501717	0.454324	0.697353	0.983363	1	1	1	0	0	0.0303372	0	0	0	0	0	0.419787	0.550252	0.42921	0.61334
6.8991	5.91567	24.4828	3.91511e-06	0.00182332	Bag6	224727	17	35135178	35147322	0.467791	0.378749	0.503031	0.49322	0.431055	0.53358	0.50611	0.518787	0.50466	0.465146	0.45223	0.503776	0.470679	0.408419	0.474782	0.50798	0.495816	0.527066	0.535471	0.524743	0.511835	0.570972	0.521769	0.459867	1	1	1	0.99453	0.0139248	0.00716816	0.00364213	0.0103982	0.00619549	0.00696177	0.00680849	0.00343491	0.46084	0.468875	0.499386	0.464501
7.32636	7.54991	26.4324	1.81043e-06	0.000983667	Prrc2a	53761	17	35149076	35164897	0.496645	0.445543	0.523985	0.488343	0.489052	0.531952	0.519101	0.49624	0.484876	0.531287	0.482207	0.510701	0.495257	0.47083	0.48019	0.515525	0.538627	0.542791	0.516396	0.464685	0.466857	0.503998	0.533397	0.512819	0.998055	0.99475	0.996495	0.995755	0.00294718	0.00818776	0.00948165	0.00413443	0.00514405	0	0.00756281	0.00888613	0.486425	0.511129	0.468045	0.492169
8.90694	3.10518	32.0828	2.28424e-07	0.000178719	Nfkbil1	18038	17	35220175	35235792	0.306688	0.408246	0.321123	0.262712	0.62347	0.619497	0.627391	0.593688	0.357277	0.456087	0.383708	0.57235	0.34591	0.522057	0.256673	0.258579	0.736207	0.530822	0.445117	0.697291	0.608296	0.608021	0.518815	0.65013	1	1	1	1	0	0	0	0	0	0	0	0	0.368211	0.336505	0.316214	0.462685
6.40844	1.55522	15.4331	0.000181433	0.049899	Atp6v1g2	66237	17	35233660	35238767	0.252915	0.319904	0.611912	0.402528	0.656202	0.256702	0.511027	0.339548	0.746864	0.444065	0.435676	0.531743	0.487683	0.320502	0.290685	0.48956	0.632724	1	0.436154	0.733194	0.365146	0.42484	0.606345	0.70829	1	1	1	1	0	0	0	0	0	0	0	0	0.404482	0.486703	0.55802	0.454381
7.54229	7.16955	24.3506	4.12771e-06	0.00183496	Ddx39b	53817	17	35241746	35253707	0.542157	0.517354	0.589868	0.509791	0.464386	0.467714	0.465866	0.489366	0.499968	0.503878	0.493623	0.531575	0.544398	0.479359	0.534335	0.531476	0.483507	0.464833	0.449367	0.503741	0.452336	0.495847	0.489795	0.46464	0.998528	1	0.995753	1	0.00439357	0.00605941	0.00180581	0.00588942	0.00130302	0	0.00653022	0.00139251	0.502028	0.53213	0.539519	0.519746
										0	0.1	0.2	0.3	0.4	0.5	0.6	0.7	0.8	0.9	1
									606561
[truncated: 104 more columns]

## Sheet: MATMUT.Imprint
logFC	logCPM	F	PValue	FDR	mgi_symbol	entrezgene_id	chromosome_name	start_position	end_position	Control_Ratio	Control_Ratio.1	Control_Ratio.2	Control_Ratio.3	Control_Ratio.4	Control_Ratio.5	Control_Ratio.6	Control_Ratio.7	MAT_MUT_Ratio	MAT_MUT_Ratio.1	MAT_MUT_Ratio.2	MAT_MUT_Ratio.3	MAT_WT_Ratio	MAT_WT_Ratio.1	MAT_WT_Ratio.2	MAT_WT_Ratio.3	PAT_HAPLO_Ratio	PAT_HAPLO_Ratio.1	PAT_HAPLO_Ratio.2	PAT_HAPLO_Ratio.3	Mat_HAPLO_Ratio	Mat_HAPLO_Ratio.1	Mat_HAPLO_Ratio.2	Mat_HAPLO_Ratio.3	HOMO_SIX_Ratio	HOMO_SIX_Ratio.1	HOMO_SIX_Ratio.2	HOMO_SIX_Ratio.3	HOMO_TWELVE_Ratio	HOMO_TWELVE_Ratio.1	HOMO_TWELVE_Ratio.2	HOMO_TWELVE_Ratio.3	HOMO_SIX_Ratio.4	HOMO_SIX_Ratio.5	HOMO_SIX_Ratio.6	HOMO_SIX_Ratio.7	WT_SIX_Ratio	WT_SIX_Ratio.1	WT_SIX_Ratio.2	WT_SIX_Ratio.3
-4.83995	9.94115	48.465	7.50283e-10	7.33776e-06	Slc38a4	69354	15	96994820	97055956	0.00480597	0.00731171	0.00574852	0.0117375	0.022782	0.028425	0.0279116	0.0248694	0.0876419	0.0539165	0.267928	0.0864377	0.00642465	0.00365138	0.00549692	0.00544395	0.0535403	0.00768543	0.0154907	0.0215134	0.0924631	0.0572933	0.0092887	0.0203146	0.247457	0.0905441	0.336057	0.412634	0.228958	0.389991	0.405917	0.452142	0.362575	0.436149	0.469817	0.450752	0.006308	0.00608284	0.0150685	0.00996463
-3.19745	10.4257	20.093	2.3637e-05	0.0210154	Peg3	18616	7	6703892	6730431	0.0035299	0.00374531	0.00225661	0.00293098	0.00286026	0.0027534	0.00237915	0.00276331	0.0169508	0.0141215	0.00230391	0.0275686	0.00170609	0.00254769	0.00158289	0.00214582	0.00361839	0.00203823	0.00251055	0.00457347	0.000996562	0.00346425	0.00314452	0.00400338	0.00257168	0.00357318	0.00378454	0.00509761	0.00527822	0.00807987	0.00519967	0.00551552	0.00152204	0.00326651	0.00577295	0.00484912	0.00271573	0.0017996	0.00285675	0.00146081
-2.05686	6.69351	28.7532	7.37522e-07	0.00180324	Smoc1	64075	12	81026808	81186414	0.137649	0.176757	0.109928	0.127813	0.246663	0.192686	0.169233	0.234083	0.204108	0.198417	0.518376	0.284618	0.14145	0.086643	0.138729	0.0648369	0.203223	0.126223	0.179868	0.191664	0.138662	0.200443	0.138603	0.221552	0.500034	0.496749	0.508206	0.483182	0.482451	0.504268	0.497778	0.513075	0.490294	0.46812	0.469681	0.468838	0.243879	0.145829	0.089619	0.0816092
-1.75883	3.5527	19.1059	3.58623e-05	0.0292278	Platr4	78706	3	41484024	41493192	0.369799	0.179508	0.348415	0.49758	0.339445	0.373331	0.305576	0.21519	0.593209	0.511532	0.62942	0.500098	0.322474	0.190832	0.139978	0.442056	0.362451	0.196386	0.340234	0.323618	0.21635	0.27943	0.224582	0.284628	0.671006	0.59723	0.506687	0.500702	0.488405	0.365017	0.367176	0.648297	0.487773	0.41683	0.549066	0.493567	0.368211	0.340888	0.33261	0.331063
-1.67701	8.76714	50.4268	4.01821e-10	7.33776e-06	Gab1	14388	8	80764438	80880519	0.257898	0.254156	0.22276	0.273868	0.249815	0.213671	0.222631	0.19354	0.517448	0.386452	0.474091	0.459324	0.209124	0.2277	0.204259	0.216748	0.206997	0.188776	0.211164	0.175579	0.215569	0.191406	0.17535	0.207251	0.466896	0.482707	0.498799	0.483487	0.481529	0.48232	0.497122	0.51495	0.492321	0.415771	0.519435	0.494571	0.344797	0.243123	0.258938	0.23585
-1.48161	8.44156	20.1983	2.2615e-05	0.0210154	Jade1	269424	3	41555731	41616864	0.171266	0.179681	0.220768	0.192145	0.13004	0.121416	0.105008	0.12448	0.283552	0.252657	0.544036	0.400943	0.165048	0.127471	0.270177	0.173747	0.10436	0.0879857	0.0906504	0.121117	0.111582	0.131566	0.101718	0.120537	0.535461	0.503353	0.526613	0.534319	0.451513	0.452257	0.475372	0.488643	0.46107	0.458621	0.467434	0.438149	0.185849	0.178109	0.216394	0.235374
1.71945	8.36282	21.4474	1.3444e-05	0.0154686	Dnttip2	99480	3	122274388	122285271	0.486626	0.504168	0.498054	0.495512	0.486428	0.500772	0.503344	0.471316	0.0517348	0.503937	0.0480776	0.546828	0.509117	0.477647	0.508388	0.483473	0.497091	0.500309	0.486106	0.496444	0.499651	0.490626	0.51837	0.504578	0.491123	0.485181	0.492163	0.475816	0.506865	0.490787	0.486269	0.487223	0.529617	0.507155	0.468312	0.520801	0.477768	0.45514	0.483922	0.479046
1.73785	4.59486	29.6768	5.18904e-07	0.00144997	Ap1ar	211556	3	127807007	127837523	0.436795	0.497894	0.486136	0.431881	0.493508	0.530956	0.56642	0.48351	0.10632	0.443159	0.119287	0.389532	0.589903	0.569094	0.48215	0.504948	0.439028	0.52926	0.511659	0.557885	0.565504	0.54998	0.496281	0.498318	0.518449	0.498312	0.445936	0.536033	0.565562	0.466107	0.584698	0.518133	0.474849	0.483951	0.597367	0.536432	0.535118	0.577989	0.477605	0.70025
1.00292	6.30308	19.7205	2.76475e-05	0.0235124	Mau2	74549	8	70016123	70042734	0.495396	0.52427	0.488328	0.412121	0.477824	0.514202	0.485945	0.509767	0.481554	0.169189	0.539927	0.225098	0.526375	0.444495	0.461585	0.567658	0.515474	0.594791	0.570838	0.542501	0.458477	0.54596	0.525505	0.460117	0.486308	0.463694	0.512146	0.503818	0.50022	0.525856	0.552308	0.553621	0.517404	0.512938	0.532988	0.537417	0.471742	0.519345	0.501807	0.49499
1.27203	5.22618	17.6732	6.62691e-05	0.0462937	Fkbp8	14232	8	70527724	70535328	0.492648	0.466451	0.462625	0.45809	0.618185	0.51423	0.543858	0.506959	0.428078	0.155642	0.411169	0.184674	0.464734	0.536671	0.446894	0.475289	0.473652	0.438181	0.480234	0.587016	0.503818	0.547646	0.530645	0.455931	0.400056	0.449015	0.410464	0.427946	0.524932	0.523215	0.557278	0.550558	0.508942	0.563377	0.715087	0.55748	0.479569	0.376571	0.386982	0.413598
1.17763	5.11626	18.4485	4.74705e-05	0.0371409	Mvb12a	73711	8	71542922	71548085	0.434859	0.412868	0.486136	0.480129	0.510291	0.495766	0.617034	0.559358	0.415304	0.176396	0.415575	0.192201	0.473888	0.51584	0.408828	0.486998	0.543935	0.548342	0.551008	0.521318	0.637425	0.596638	0.541472	0.618627	0.415799	0.491045	0.425425	0.492462	0.494999	0.538069	0.607138	0.47807	0.580732	0.489874	0.506102	0.644833	0.43151	0.381156	0.474068	0.531567
1.45424	4.22103	18.2083	5.26217e-05	0.0390671	Pgls	66171	8	71592176	71601092	0.615996	0.628718	0.463958	0.544096	0.430227	0.420372	0.452766	0.425394	0.501583	0.217598	0.526021	0.178694	0.544626	0.526666	0.533521	0.624669	0.450037	0.515156	0.41658	0.489436	0.52514	0.35342	0.400286	0.43495	0.587036	0.600444	0.525987	0.637256	0.516643	0.437285	0.48733	0.531378	0.481286	0.465044	0.437861	0.470692	0.624634	0.552459	0.486366	0.608656
1.23567	5.3486	20.8459	1.72539e-05	0.0177624	Eps15l1	13859	8	72340999	72421460	0.458769	0.470612	0.451347	0.457419	0.593685	0.43999	0.527137	0.536341	0.44416	0.173741	0.503421	0.181145	0.501496	0.557761	0.463738	0.427842	0.613259	0.557764	0.607392	0.607192	0.533153	0.576672	0.555273	0.540285	0.423746	0.499153	0.430664	0.505082	0.522963	0.458339	0.622867	0.566769	0.516097	0.544873	0.516061	0.486713	0.470049	0.484379	0.442319	0.529366
1.19332	9.49467	22.3161	9.40459e-06	0.0129166	Calr	12317	8	84841850	84846934	0.475762	0.483353	0.468871	0.475393	0.50607	0.523787	0.519979	0.52905	0.489546	0.187781	0.488749	0.191191	0.500011	0.485592	0.477608	0.492237	0.527586	0.518888	0.534474	0.527667	0.529758	0.521458	0.510763	0.529844	0.475511	0.49466	0.482713	0.475986	0.51753	0.519813	0.53907	0.516173	0.508701	0.509746	0.510295	0.525071	0.482314	0.483279	0.468804	0.487901
0.988532	8.14922	24.9332	3.27151e-06	0.00639908	Tnpo2	212999	8	85036915	85057583	0.476923	0.492038	0.500969	0.487069	0.462306	0.526881	0.504475	0.51322	0.47705	0.216025	0.475418	0.171761	0.485245	0.487819	0.526559	0.501712	0.485552	0.512746	0.489579	0.574619	0.498176	0.522901	0.503397	0.506555	0.484058	0.493823	0.50247	0.484753	0.476013	0.510587	0.503079	0.526688	0.516642	0.495249	0.509833	0.507742	0.490311	0.490706	0.506738	0.512738
1.02545	7.90968	23.2211	6.50527e-06	0.0106036	Vps35	65114	8	85260392	85299802	0.45131	0.487716	0.440057	0.4809	0.528249	0.53695	0.544731	0.489893	0.494411	0.18558	0.46837	0.179209	0.483982	0.486204	0.506163	0.439844	0.515119	0.489285	0.555638	0.565411	0.518718	0.504843	0.503737	0.544978	0.46801	0.471024	0.456162	0.470396	0.547765	0.553116	0.523064	0.551039	0.529008	0.532888	0.520031	0.512746	0.479497	0.474177	0.479486	0.471188
1.24403	4.54042	20.9195	1.67334e-05	0.0177624	Rpgrip1l	244585	8	91217030	91313262	0.468925	0.548838	0.486136	0.520081	0.527237	0.503703	0.50668	0.548569	0.49229	0.20259	0.469389	0.217191	0.51106	0.530962	0.573086	0.493907	0.48604	0.448914	0.436154	0.426137	0.525323	0.499763	0.491472	0.55296	0.55016	0.518862	0.484939	0.589074	0.510154	0.548283	0.461744	0.674463	0.463623	0.412415	0.440495	0.430045	0.445158	0.499523	0.486366	0.450316
1.03423	7.00554	18.1513	5.39269e-05	0.0390671	Fto	26383	8	91313525	91668439	0.450372	0.449289	0.412154	0.402282	0.5509	0.567758	0.560893	0.549536	0.450531	0.174727	0.435359	0.158612	0.431447	0.470812	0.401051	0.448472	0.581431	0.581777	0.507723	0.559782	0.541266	0.557994	0.533818	0.521137	0.478571	0.461994	0.425084	0.450357	0.533086	0.533015	0.536968	0.536174	0.539787	0.563967	0.541829	0.581163	0.472807	0.453452	0.454282	0.418232
1.1773	6.25452	20.2472	2.21556e-05	0.0210154	Arl2bp	107566	8	94666600	94674425	0.49218	0.517179	0.5535	0.501592	0.485808	0.519745	0.503091	0.458827	0.546896	0.222216	0.549688	0.185156	0.536905	0.546421	0.535303	0.522399	0.489205	0.414257	0.480391	0.385646	0.450154	0.486855	0.530417	0.523294	0.511305	0.480308	0.420465	0.531358	0.496835	0.465072	0.542398	0.503243	0.401818	0.473022	0.433105	0.455984	0.50205	0.521813	0.523109	0.578194
1.07332	5.80242	24.9569	3.24081e-06	0.00639908	Cdc40	71713	10	40831621	40883311	0.463645	0.482922	0.533766	0.529767	0.54706	0.476627	0.531445	0.531841	0.201331	0.320454	0.268464	0.508877	0.508446	0.471462	0.441895	0.48343	0.534559	0.524085	0.499685	0.616006	0.533233	0.514369	0.536756	0.503281	0.482399	0.487233	0.472302	0.471081	0.525763	0.553528	0.626507	0.459241	0.549189	0.520573	0.542999	0.486963	0.453946	0.497937	0.445349	0.450638
1.29983	7.61788	32.0046	2.16957e-07	0.000926417	Snx3	54198	10	42502030	42535381	0.493693	0.451858	0.467614	0.478923	0.481423	0.525439	0.513263	0.510097	0.145504	0.273533	0.159929	0.557691	0.49391	0.479904	0.488811	0.50635	0.557922	0.498712	0.474978	0.50083	0.510671	0.537468	0.530716	0.547489	0.465828	0.459925	0.460373	0.488148	0.472799	0.510184	0.493694	0.508046	0.491959	0.526579	0.5175	0.504599	0.459153	0.465849	0.474346	0.473086
1.05735	6.47909	22.1895	9.90538e-06	0.0129166	Bend3	331623	10	43478831	43515396	0.536539	0.529073	0.563939	0.537545	0.395415	0.472177	0.484356	0.472195	0.264226	0.392897	0.264622	0.545874	0.544648	0.520537	0.503519	0.500124	0.461338	0.464189	0.474609	0.494949	0.466477	0.471651	0.463932	0.431008	0.527568	0.50848	0.523307	0.521511	0.470154	0.536478	0.453661	0.462728	0.467648	0.523839	0.420675	0.439245	0.560397	0.548264	0.508818	0.562337
3.07968	3.51161	31.2785	2.84177e-07	0.000926417	Rtkn2	170799	10	67979570	68059740	0.619828	0.60391	0.59785	0.578403	0.506844	0.444628	0.522127	0.534405	0	0.318868	0	0.276615	0.639887	0.472945	0.651193	0.555752	0.596227	0.388904	0.519621	0.486673	0.419135	0.508383	0.486071	0.402388	0.548358	0.608484	0.644205	0.42651	0.52529	0.477393	0.551043	0.315456	0.183227	0.347942	0.460999	0.490671	0.511237	0.577989	0.454798	0.591884
2.89101	5.69953	44.8393	2.44268e-09	1.59262e-05	Arid5b	71371	10	68092520	68278740	0.522234	0.478417	0.45209	0.474374	0.483023	0.474026	0.462108	0.452539	0.00317269	0.203718	0.0103068	0.146157	0.420894	0.469194	0.497285	0.491843	0.513826	0.509282	0.477315	0.54383	0.439807	0.561121	0.510472	0.481291	0.477445	0.525343	0.43965	0.443421	0.572617	0.493137	0.56238	0.461782	0.527117	0.52008	0.514948	0.503578	0.497977	0.414419	0.472661	0.515557
2.46037	3.55464	31.3133	2.80517e-07	0.000926417	1190007I07Rik	544717	10	82619851	82623228	0.555457	0.459377	0.356408	0.475197	0.54916	0.642791	0.498205	0.662964	0.0480133	0.205128	0.107645	0.249151	0.479494	0.394439	0.503099	0.522058	0.591354	0.643503	0.545171	0.614985	0.475309	0.715213	0.461125	0.630935	0.493488	0.449015	0.475519	0.549784	0.369411	0.514025	0.325926	0.427921	0.585076	0.372212	0.449342	0.674791	0.421013	0.61714	0.449431	0.639279
1.90522	5.25472	21.9647	1.08628e-05	0.0132798	Nedd1	17997	10	92684746	92722420	0.548951	0.444179	0.414225	0.4326	0.485623	0.583902	0.496739	0.565228	0.49791	0.160891	0	0.138698	0.508969	0.425477	0.473977	0.531281	0.518471	0.492471	0.551343	0.599344	0.486537	0.497856	0.547273	0.507556	0.403603	0.488315	0.477335	0.492845	0.487415	0.532174	0.569612	0.515744	0.503734	0.491077	0.571787	0.525309	0.449051	0.412464	0.466108	0.362285
2.03843	5.63427	24.0777	4.60497e-06	0.00818847	Cdk17	237459	10	93160875	93267071	0.496352	0.462177	0.461474	0.532414	0.609627	0.539515	0.608261	0.462534	0.562169	0.211753	0.00389184	0.181581	0.570887	0.549928	0.478183	0.576572	0.520954	0.589535	0.496853	0.51175	0.504672	0.477748	0.58024	0.506476	0.477843	0.510854	0.501748	0.526203	0.532999	0.512585	0.557322	0.570496	0.498361	0.507211	0.544713	0.509195	0.436851	0.500989	0.532841	0.449582
1.55689	5.85919	22.5811	8.43921e-06	0.0126978	Srfbp1	67222	18	52465693	52491931	0.510288	0.512537	0.482323	0.466673	0.492645	0.450785	0.446167	0.521485	0.506648	0.114788	0.127764	0.403886	0.492535	0.535076	0.585723	0.55824	0.560357	0.546152	0.524564	0.48852	0.520568	0.523297	0.483681	0.452205	0.514918	0.533975	0.500183	0.450125	0.497044	0.454144	0.536794	0.486187	0.468209	0.484556	0.490653	0.516963	0.511905	0.56775	0.527968	0.582711
										0	0.1	0.2	0.3	0.4	0.5	0.6	0.7	0.8	0.9	1
[truncated: 104 more columns]

## Sheet: Control.Imprint.edgeR
logFC	logCPM	F	PValue	FDR	mgi_symbol	entrezgene_id	chromosome_name	start_position	end_position	Control_Ratio	Control_Ratio.1	Control_Ratio.2	Control_Ratio.3	Control_Ratio.4	Control_Ratio.7	Control_Ratio.5	Control_Ratio.6	MAT_MUT_Ratio	MAT_MUT_Ratio.1	MAT_MUT_Ratio.2	MAT_MUT_Ratio.3	MAT_WT_Ratio	MAT_WT_Ratio.1	MAT_WT_Ratio.2	MAT_WT_Ratio.3	PAT_HAPLO_Ratio	PAT_HAPLO_Ratio.1	PAT_HAPLO_Ratio.2	PAT_HAPLO_Ratio.3	Mat_HAPLO_Ratio	Mat_HAPLO_Ratio.1	Mat_HAPLO_Ratio.2	Mat_HAPLO_Ratio.3	HOMO_SIX_Ratio	HOMO_SIX_Ratio.1	HOMO_SIX_Ratio.2	HOMO_SIX_Ratio.3	HOMO_TWELVE_Ratio	HOMO_TWELVE_Ratio.1	HOMO_TWELVE_Ratio.2	HOMO_TWELVE_Ratio.3	HOMO_SIX_Ratio.4	HOMO_SIX_Ratio.5	HOMO_SIX_Ratio.6	HOMO_SIX_Ratio.7	WT_SIX_Ratio	WT_SIX_Ratio.1	WT_SIX_Ratio.2	WT_SIX_Ratio.3
1.98654	2.53497	37.9368	2.55889e-08	9.79491e-07	Gm6104		1	4880049	4880651	0.883493	0.730071	0.773024	0.845455	0.691584	0.849743	0.737683	0.893172	0.774885	0.584102	0.920512	0.764402	0.860869	0.834196	0.870021	0.932917	0.726623	0.820856	0.529443	0.507514	0.664032	0.922434	0.70821	0.939791	0.766557	0.918853	0.856383	0.798246	0.769195	0.547269	0.614733	0.816671	0.568689	0.765309	1	0.756834	0.525926	0.500989	0.71632	0.833241
9.33433	9.22101	1048.44	1.35728e-48	2.41349e-45	Gm28439		1	24611535	24612410	0.996565	0.998434	0.998638	0.999456	1	0.997806	0.999207	0.998791	0.99939	0.997296	0.99965	0.998855	0.999446	0.999146	0.999398	0.99912	0.998709	0.998462	0.998529	1	0.999688	1	0.99967	0.999664	0.998818	0.998579	0.99971	0.999617	0.999071	0.999658	1	0.99968	0.999463	0.999714	0.998583	1	0.998365	0.998682	0.999235	0.999096
13.3895	8.25938	50.3812	4.09064e-09	1.64297e-07	Gm10222		1	24612407	24612700	1	1	1	1	1	1	1	1	1	1	1	1	1	1	1	1	1	1	1	1	1	1	1	1	0.977354	1	1	1	1	1	1	1	1	1	1	1	1	1	1	1
13.7646	9.59513	1656.54	2.73106e-56	5.9355e-53	Gm28438		1	24612775	24613119	1	0.999602	1	1	1	1	1	1	1	0.999452	1	1	1	1	0.999694	1	1	1	1	0.999746	0.999661	1	1	0.999806	1	0.999745	1	1	0.999607	1	0.999521	1	1	1	0.999818	1	0.998757	1	1	1
10.7847	11.1656	215.315	1.09488e-24	3.5693e-22	Gm28437		1	24613189	24613971	0.999477	0.999469	0.999715	0.999648	0.998695	0.998644	0.996326	0.998532	0.999639	0.999357	0.999527	0.999322	0.999599	0.99968	0.999596	0.999633	0.999643	0.998468	0.999643	0.999638	0.999106	0.998892	0.997958	0.997961	0.998922	0.999379	0.999549	0.999507	0.997755	0.999022	0.999188	1	0.999765	0.998686	0.999332	0.999354	0.999115	0.999212	0.999654	0.999571
10.4605	8.83083	188.764	2.50343e-22	5.50192e-20	Gm10925		1	24613974	24614651	0.999692	0.9986	0.999322	0.999433	1	0.998047	1	1	0.999808	0.999302	0.999296	0.999272	0.999423	0.999806	0.999561	0.999594	1	1	1	1	1	1	1	1	0.999159	0.999	0.999615	0.999315	1	1	0.997924	0.998	1	0.998607	1	0.998491	0.998911	0.999428	0.998984	0.999791
5.29422	3.34443	111.48	5.69279e-17	4.69835e-15	Gm28661		1	24614885	24615565	1	1	1	0.962216	0.943778	0.963943	0.983056	1	1	1	1	0.91458	1	1	1	0.954751	1	0.931397	1	1	1	0.986563	0.958217	0.98955	0.968087	0.982355	1	1	0.989671	0.985443	1	0.969932	1	0.990639	0.982157	0.979476	1	0.968094	1	1
9.82365	9.41977	420.844	4.22002e-34	4.12718e-31	Gm29216		1	24615706	24616197	0.998807	0.999182	0.998952	0.999287	0.998592	0.998128	0.997386	1	0.999062	0.998773	0.999345	0.999426	0.999539	0.999814	0.999661	0.998927	0.998715	1	1	0.998137	0.998657	1	0.999397	1	0.999873	0.999228	0.999085	0.999532	1	1	0.999155	0.998346	0.998711	0.999542	0.999472	0.998495	0.999353	0.999374	0.999516	0.999483
2.51853	0.768812	11.2632	0.00119824	0.0294072	Gm15455	433287	1	33836124	33838680	0.825769	0.894368	1	1	#NUM!	0	0.674493	0	0.855091	1	0.491105	0.421971	0.432312	1	0.625943	1	0.508273	0	1	1	#NUM!	0.508383	0.506626	0.67545	1	1	1	0.849674	0.257694	0.345917	0.515442	0.300751	0.338955	0.205966	0.609045	0.205951	0.322239	1	0.850332	1
-4.02641	3.28322	85.0795	2.50309e-14	1.51113e-12	Zdbf2	73884	1	63273265	63314576	0.112205	0.0651461	0.0225538	0.0645595	0.0488761	0.0513389	0.0203006	0.033664	0.171533	0.0676199	0.0264648	0.0366903	0	0.11876	0.0834676	0.0963035	0.0997058	0.056512	0.0979338	0	0	0.0264924	0.0310917	0.0394555	0.121243	0.135896	0.105297	0.0449829	0.0123922	0.0277924	0	0.01568	0.018982	0.0431643	0.179416	0.10336	0.0238016	0.0882184	0.101307	0.0796326
0.620174	6.32841	20.3684	2.10592e-05	0.00064062	Itih5	209378	2	10153571	10256529	0.635851	0.607318	0.662769	0.670547	0.537248	0.545916	0.583325	0.579973	0.680389	0.611873	0.690788	0.666339	0.589799	0.59211	0.645531	0.670656	0.615083	0.596516	0.593681	0.724713	0.54707	0.642689	0.575803	0.554364	0.545209	0.458464	0.612167	0.6927	0.533538	0.594917	0.536521	0.397044	0.450327	0.520522	0.495794	0.47676	0.610637	0.565039	0.650325	0.692898
-4.8953	1.40527	36.6209	4.98773e-08	1.87977e-06	Gm13261		2	10339283	10374041	0.13643	0	0	#NUM!	0	0	0	0	0.329642	0	0	#NUM!	0.322474	0	0	0	0	0.126991	0	0	0	0	0	0	0.778676	0.541181	0.775394	0.738637	0.129511	0.0527337	0.0623389	0.243901	0.0426843	0.0739134	0.154888	0.137642	0	0	0.321323	0
-7.91909	10.7602	1010.16	5.60699e-48	8.43636e-45	Sfmbt2	353282	2	10370510	10595253	0.00601426	0.00432087	0.00276244	0.00334865	0.00599363	0.00389537	0.00405994	0.00252854	0.0191536	0.0157545	0.00812301	0.0245717	0.0168614	0.00866696	0.00580465	0.00494301	0.00278723	0.00585534	0.00205899	0.00411115	0.00552888	0.00504534	0.00480408	0.0044749	0.442306	0.471566	0.363112	0.426582	0.250634	0.122263	0.405586	0.36728	0.380609	0.388507	0.315267	0.297544	0.00423465	0.00517905	0.00607827	0.00693127
-7.1942	3.0491	245.883	1.41512e-25	5.22258e-23	Gm22072		2	10465287	10465407	0	0	0	0	0	0.0285395	0	0	0.0223602	0.114539	0	0	0	0	0	0	0	0	0	0	0	0.0703436	0.0293164	0.0231035	0.552468	0.45496	0.352788	0.514513	0.359297	0.154237	0.397681	0.58027	0.487061	0.350453	0.224704	0.283271	0	0.0287782	0	0.0173197
-6.0567	1.43532	69.0567	2.30379e-11	1.07036e-09	Mir466m	100526481	2	10466663	10466746	0	0	0	0	0	0	0	0	0	0	0	0.139582	0	0	0	0	0	0	0	0	0	0	0	0	0.384792	0.767583	0.46884	0.458825	0.115187	0.209129	0.680253	1	0.231727	0.22056	0.280295	0.237364	0	0	0	0
-9.05115	3.66984	290.193	1.51402e-27	7.05102e-25	Mir466f-1	100124486	2	10466944	10467037	0	0	0	0	0	0	0	0	0	0.0656141	0	0	0.055071	0	0	0	0	0.052169	0	0	0	0	0	0.0144446	0.468625	0.557158	0.387664	0.468254	0.197537	0.193802	0.291277	0.283744	0.275837	0.390765	0.252165	0.213913	0	0	0	0.0734842
-8.01574	3.78252	322.983	3.83614e-29	2.20691e-26	Mir669f	100316667	2	10467229	10467349	0	0	0	0	0	0	0.0126294	0	0.0204962	0	0.0394457	0.162949	0	0	0.0195322	0	0	0	0.0475332	0	0	0	0	0	0.426948	0.550902	0.60941	0.508023	0.229322	0.152264	0.231394	0.37397	0.342186	0.36618	0.21052	0.314811	0	0.0226038	0	0
-8.57751	3.35243	435.738	1.32721e-31	1.08167e-28	Mir669e	100316806	2	10467495	10467613	0	0	0	0	0	0	0	0	0.0703316	0.0265825	0	0	0	0	0	0	0	0	0	0	0	0	0.0157913	0	0.43045	0.477029	0.244511	0.365356	0.297305	0.174607	0.265608	0.334128	0.290883	0.361408	0.310675	0.266876	0	0	0	0
-6.57427	3.32843	244.158	1.73818e-25	6.29606e-23	Mir669b	735255	2	10467790	10467886	0.0351752	0	0	0	0.0213992	0	0	0	0.0245972	0	0.0537177	0.0389757	0	0	0	0	0	0	0	0.0251158	0	0	0	0	0.360172	0.42515	0.265851	0.414014	0.316412	0.128088	0.515442	0.624999	0.397321	0.353206	0.277796	0.37525	0	0	0	0.0202708
-8.2365	2.98277	270.985	4.13092e-25	1.36951e-22	Gm23578		2	10468069	10468172	0	0	0	0	0	0	0	0	0.0447372	0	0	0.0464091	0.028888	0	0	0	0	0	0	0	0	0	0	0	0.417741	0.543013	0.444093	0.547754	0.381632	0.14474	0.586489	0.518133	0.338955	0.295758	0.214642	0.131415	0	0	0	0.0433564
-6.16985	2.43937	98.9011	4.80412e-15	3.16393e-13	Mir669d	100316664	2	10468343	10468463	0	0	0.0864277	0	0	0	0	0	0	0	0	0	0	0	0	0	0	0	0	0	0	0	0.021381	0	0.484058	0.509315	0.577203	0.64021	0.355404	0	0.290342	0.0855062	0.246022	0.244849	0.320685	0.310855	0	0	0.0951965	0.0796326
-7.95363	2.82338	229.755	1.42152e-22	3.15964e-20	Mir466f-2	100124445	2	10468675	10468768	0	0	0	0	0	0	0	0	0.115929	0	0	0.0464091	0	0	0.0319207	0	0	0	0	0	0	0	0	0	0.507879	0.287953	0.405682	0.429753	0.147904	0.0458726	0.387102	0.237375	0.364792	0.474301	0.33626	0.310855	0	0	0	0
-6.05364	2.57237	132.72	4.09021e-18	4.25281e-16	Mir669l	100316815	2	10468971	10469068	0.0559302	0	0	0	0	0	0	0	0.0895418	0	0	0.139582	0.0910757	0	0	0	0	0	0	0	0	0	0	0	0.355622	0.485492	0.290456	0.429753	0.302621	0.0555007	0.381129	0.401928	0.299375	0.35534	0.365875	0.341557	0	0	0.0316196	0
-6.72582	2.70917	223.843	5.62027e-24	1.57047e-21	Mir669d-2	100526550	2	10471644	10471729	0	0	0	0	0.035406	0	0	0	0.0895418	0	0.0537177	0	0	0	0	0	0	0	0	0	0	0	0	0	0.529598	0.52842	0.438238	0.389556	0.319105	0.174607	0.422405	0.502985	0.261243	0.401687	0.370482	0.313417	0	0	0.0452053	0
-7.03892	2.03104	89.1543	1.07063e-13	5.94927e-12	Mir466f-3	100124475	2	10471953	10472046	0	0	0	0	0	0	0	0	0.174063	0	0	1	0	0	0	0	0	0	0	0	0	0	0	0	0.621478	0.679807	0.37858	0.409727	0	0.110666	0.158049	0.240268	0.254753	0.433274	0.0940845	0.0493154	0	0.119296	0	0
-5.91455	2.76889	173.926	4.91241e-21	8.65646e-19	Mir297a-2	723945	2	10472254	10472343	0	0	0	0	0.0331237	0.0586612	0	0	0.0393652	0	0	0	0.114893	0	0.0342043	0	0	0	0	0	0	0	0	0	0.494692	0.471231	0.469343	0.567222	0.458342	0.190315	0.476925	0.196386	0.344125	0.373669	0.348158	0.187355	0	0	0	0
-4.23775	1.3145	42.3404	8.31282e-09	3.26503e-07	Gm26073		2	10473351	10473477	0.486626	0	0	0	0	0	0	0.0946213	0	0.329557	0	0	0	0	0	0	0	0	0	0	0	0.114467	0	0	0.808499	1	0.628906	0.361112	0.454496	0.209129	0.515442	0.5891	0.277752	0.22056	0.206122	0.0689924	0	0	0	0
-6.78602	1.69403	93.703	1.38788e-13	7.64702e-12	Mir467c	100124487	2	10473931	10474027	0	0	0	0	0	0	0	0	0	0	0	0	0.322474	0	0.0639348	0	0	0	0	0	0	0	0	0	0.308802	0.266284	0.224625	0.585587	0.533931	0.283998	1	0.600857	0.430407	0.41634	0.372435	0.475833	0	0	0	0
-5.53092	2.2674	81.6066	8.1087e-14	4.53448e-12	Mir669k	100316663	2	10475300	10475426	0	0	0	0	0.0759738	0	0	0	0	0.109439	0.0968426	0	0	0	0	0.0740094	0	0.0581249	0	0.0856585	0	0.0382519	0	0.0335237	0.621478	0.629422	0.63617	0.508898	0.129511	0.186951	0.389589	0.138888	0.347151	0.216721	0.198253	0.152851	0.0596138	0	0	0
-7.08296	2.00367	101.144	1.96417e-14	1.19686e-12	Gm26491		2	10475500	10475620	0	0	0	0	0	0	0	0	0	0	0.074434	0	0	0.0998958	0	0	0	0	0	0	0	0	0	0	0.572702	0.435679	0.196204	0.556747	0.234486	0.105165	0.463601	0.349649	0.301576	0.297117	0.121631	0.0939954	0	0	0	0
-4.72652	1.53701	76.8492	2.70374e-13	1.45289e-11	Mir467a-1	735286	2	10476346	10476418	0	0	0	0	0	0.0466777	0	0.104041	0	0.329557	0	0	0	0	0	0	0.0936815	0.126991	0	0	0.25656	0	0	0	0.353706	0.40263	0.320079	0.414014	0.221204	0.0956542	0.321008	0.306882	0.105808	0.39338	0.326445	0.365632	0	0	0	0
-7.23826	2.3358	30.4434	5.07031e-07	1.76783e-05	Mir669g	100316802	2	10477150	10477272	0	#NUM!	0	0	0	0	0	0	0.495836	0	#NUM!	0	#NUM!	1	0	0	0	0	0	0	0.0910661	0	0	0	0.970447	0.954043	0.78409	0.941227	0	0	0.0424412	0.0763938	0	0	0.0828291	0	0.487414	0	0	#NUM!
-7.00157	1.90574	126.321	2.5145e-16	1.92877e-14	Gm25701		2	10477710	10477836	0	0	0	0	0	0	0	0	0	0	0	0	0	0	0	0	0	0	0	0	0	0	0.0732068	0	0.39096	0.531029	0.385628	0.30537	0.238059	0.131268	0.515442	1	0.394892	0.315603	0.418267	0.307781	0	0	0	0
-6.88336	2.89441	127.207	1.11336e-17	1.02723e-15	Mir669j	100316770	2	10477910	10478030	0	0	0	0	0	0	0.0211286	0	0.0492147	0.042775	0	0.447858	0.0433637	0	0	0	0	0	0	0	0	0	0	0	0.581577	0.619062	0.668604	0.525136	0.0716199	0.0270809	0.2713	0.163532	0.244625	0.165019	0.0675621	0.153659	0	0	0	0
-5.94729	1.00094	55.7231	3.00502e-10	1.29753e-08	Mir467a-2	100124624	2	10478798	10478880	0	0	0	0	0	0	0	0	0	0	0	0	0	0	0	0	0	0	0	0	0	#NUM!	0.33925	0	0	0.361497	0.211981	0.299817	0.675632	0.345917	1	0.928074	0.869551	0.453567	0.721944	0.54759	0	0	0	0
-6.00638	2.18955	92.4391	5.9527e-15	3.86826e-13	Gm24315		2	10480165	10480291	0	0	0	0.086191	0	0	0	0	0.14083	0.140783	0.080655	0	0	0	0	0	0.0430084	0	0	0	0.0287301	0	0.0277329	0.0415564	0.692467	0.715609	0.526673	0.528005	0.0494955	0	0.1057	0.0510202	0.266804	0.223731	0.0305112	0.147421	0	0	0	0
-4.33709	0.826076	25.805	3.90936e-06	0.000125975	Gm25451		2	10480365	10480485	0	0.484738	0	0	0	0	0	0	0	#NUM!	0	#NUM!	0	0	#NUM!	0	0	0	0	0	0	0	0	0	0.413025	0.386153	1	0.868321	0	0.345917	0.298489	0.472588	0.390595	0.341578	0.206122	0	0	0	0	0
-5.00153	0.932707	11.0993	0.00174931	0.0419319	Mir669a-5	100526483	2	10481761	10481847	#NUM!	#NUM!	#NUM!	#NUM!	0	0	0	0	#NUM!	#NUM!	#NUM!	#NUM!	#NUM!	#NUM!	#NUM!	#NUM!	0	0	0	0	0	0	0	0	1	1	1	1	0	0	0	0	0	0	0	0	#NUM!	#NUM!	#NUM!	#NUM!
-3.97144	0.49396	10.8853	0.00163006	0.0393145	Gm24761		2	10482612	10482738	0	0	0	0	0	#NUM!	0	0	0	#NUM!	0	0	#NUM!	0	#NUM!	0.324118	0	0	0	0	0	0	0	0	1	0.485492	0.484939	0.485076	#NUM!	0	#NUM!	0	0	0.401687	0.509457	0.29328	0.147405	0	0	0
-5.73881	2.07726	27.1842	1.97984e-06	6.54149e-05	Gm23651		2	10482812	10482931	0.240102	0	0	0	0	0	0	0	0	0	0	0.195714	0.159934	0	0	0	0	0	0	0	0	0	0	0	0.935659	0.959333	0.87832	0.878379	0	0	0	0.062972	0.0818738	0.133234	0	0	0	0	0	#NUM!
-3.89793	0.183103	15.6078	0.000230558	0.00621172	Gm23108		2	10484490	10484613	0	#NUM!	0	0	0	#NUM!	0	0	0	0	#NUM!	0	0	0	0	0	0	0	#NUM!	#NUM!	#NUM!	0	0	0	0	0	0	0	0	1	#NUM!	0	0.60603	1	0.509457	0.256961	0	0	0	0
-2.98287	0.305495	10.2773	0.00202709	0.0482358	Gm22775		2	10485250	10485369	0	0	0.486136	0	0	0	#NUM!	0	0	0	0	#NUM!	0	0	0	#NUM!	0	0	0	0	#NUM!	0	0.255003	0	0.652344	0.485492	0	0	0	0	0	1	0.506298	0.75685	0	0	0	#NUM!	0	1
-7.53917	2.12917	19.8316	4.36267e-05	0.00128903	Gm24167		2	10489410	10489533	0	0	0	0	#NUM!	#NUM!	0	#NUM!	0	0	0	0	0	0	0	0	#NUM!	0	#NUM!	#NUM!	#NUM!	#NUM!	#NUM!	0	0	0	0	0	1	1	1	1	1	1	1	1	0	0	0	0
-2.90386	1.68889	32.9469	2.00325e-07	7.25621e-06	Gm24640		2	10489971	10490096	0.240102	0.349626	0.415044	0.239198	0	0	0	0	0.227825	0.0656141	0.208355	0.139582	0.302012	0.295411	0	0.264522	0	0	0	0	0	0	0	0	0.353706	0.775779	0.604738	0.701945	0.274685	0.434788	0.1057	0	0.530089	0.23738	0.341793	0.237364	0.15979	0.0793583	0.205244	0
-4.15909	0.211755	13.7882	0.000490754	0.012731	Gm23288		2	10490167	10490287	0	0	0	0	#NUM!	#NUM!	0	#NUM!	0	0	0	#NUM!	0	0	0	0	#NUM!	#NUM!	#NUM!	0	0	#NUM!	#NUM!	#NUM!	0.189989	0.239275	0	0.320198	0	#NUM!	#NUM!	0.682593	0.8602	0.67481	#NUM!	#NUM!	0	0	0	0
-7.20037	2.78053	55.4282	1.23747e-10	5.46385e-09	Gm24673		2	10491860	10491983	0	0.0159611	0	0	0	0	0	0	0	0	0	0	0	0	0	0.0168383	0	0	0.507723	0	0	0	0	0	0.0776589	0.0473137	0.0216732	0.149126	0.656279	0.413539	0.841739	0.611128	0.918571	0.841348	0.799243	0.713461	0.0209213	0	0	0
-5.78539	1.03362	14.8217	0.000334912	0.00890064	Gm22635		2	10492421	10492546	0	0	0	0	#NUM!	0	#NUM!	#NUM!	0	0	0	0	0	0	0	0	0	#NUM!	#NUM!	#NUM!	#NUM!	#NUM!	#NUM!	0	0	0	0	0	1	1	1	1	1	1	1	0.674791	0	0	0	0
-4.87388	0.398079	15.7145	0.000247778	0.00665732	Gm24028		2	10496791	10496914	0	0	0	0	#NUM!	#NUM!	#NUM!	#NUM!	0	0	0	0	0	0	0	0	#NUM!	#NUM!	1	#NUM!	#NUM!	#NUM!	#NUM!	0	0	0	0.0947056	0	1	1	1	1	1	1	0	1	0	0	0	0
-6.84198	2.77632	180.117	1.42863e-20	2.34824e-18	Gm26156		2	10499204	10499326	0.0528139	0	0	0	0	0	0	0	0.0532086	0.042775	0	0	0	0	0	0	0	0	0	0	0	0.0246016	0	0	0.509497	0.653645	0.337278	0.61339	0.224382	0.127317	0.309339	0.196386	0.250603	0.321719	0.176869	0.276529	0	0	0	0
-4.46125	3.71167	133.619	6.40921e-19	7.69105e-17	Gm23571		2	10499763	10499889	0.0570523	0.0382307	0.0400649	0.108154	0.0250502	0	0	0	0.0158668	0.0138498	0.0375282	0.0314255	0.0744542	0.008503	0.0242351	0.0641145	0.0215193	0	0	0	0	0.0215286	0.0176963	0	0.33388	0.350313	0.273576	0.287612	0.430985	0.154237	0.549818	0.538908	0.451686	0.485841	0.443527	0.405898	0.032845	0.0107812	0	0.0391907
-7.35434	3.7437	338.011	7.05001e-31	4.92494e-28	Gm25316		2	10499966	10500083	0	0	0	0	0.0168408	0	0.0191736	0	0.0302763	0	0	0.0335948	0.015878	0	0	0	0.0156534	0	0	0	0	0	0.0138715	0	0.351659	0.520417	0.385628	0.338877	0.350094	0.105165	0.451146	0.529221	0.411886	0.380333	0.423845	0.266386	0	0	0	0
-4.32275	0.981182	12.1349	0.000919329	0.0229363	Mir669a-11	100526495	2	10501339	10501425	1	#NUM!	#NUM!	#NUM!	0	0	0	0	#NUM!	#NUM!	1	#NUM!	#NUM!	#NUM!	#NUM!	#NUM!	0	0	0	0	0	0	0	0	1	1	1	1	0	0	0	0	0	0.0940031	0	0	#NUM!	#NUM!	1	#NUM!
-6.20725	3.53003	167.554	1.65694e-20	2.59278e-18	Gm23988		2	10501633	10501754	0.0184244	0	0	0	0.0554711	0.0193902	0	0	0.0807224	0	0	0.0295194	0	0.0124218	0	0	0	0	0	0	0	0	0	0.0676858	0.282351	0.2922	0.249799	0.271968	0.478211	0.199279	0.421771	0.385461	0.560062	0.390181	0.447933	0.474917	0	0	0	0
-6.79366	3.64819	255.358	5.94497e-27	2.58408e-24	Gm25673		2	10502191	10502317	0	0.0214097	0	0.02422	0	0	0	0.015359	0.0393652	0.0468521	0	0	0.0280372	0	0.0456296	0	0.024887	0	0	0	0	0	0.0235915	0	0.501603	0.614921	0.408048	0.60621	0.156812	0.0527337	0.210069	0.190424	0.34201	0.411197	0.264043	0.227452	0.0166967	0	0	0
-7.67033	2.60184	139.617	1.48787e-17	1.32285e-15	Gm25753		2	10502391	10502511	0	0	0	0	0	0	0	0	0	0	0	0	0	0.0315045	0	0	0.0356017	0	0	0	0	0	0.0244335	0	0.632358	0.633692	0.419223	0.434256	0.384568	0	0.539193	0	0.338955	0.397688	0.177879	0.223715	0	0	0	0
-5.76601	1.0509	47.5049	5.08669e-09	2.03884e-07	Mir466b-3	100124474	2	10503565	10503645	0	0	0	0	0	0	0	0	0	#NUM!	0	0.0887016	0	0	0	0	0	0	0	0	0	0	0	0	0.546744	0.585991	0.573565	0.868321	0.510154	0.209129	0.680253	#NUM!	0.472941	0.307801	0	0.341557	0	0	0	#NUM!
-3.33884	0.492456	14.1587	0.000358342	0.00951042	Gm26398		2	10504647	10504773	0	0	0.486136	0	0	0	0	0	0	1	#NUM!	#NUM!	0	#NUM!	0	0	0.128665	0	0	0	0	0	0	0	0.90368	1	0.158464	0.485076	0.172385	0	1	0.518133	0.479968	0.205966	0	0.147421	0	0	#NUM!	0
-6.49653	1.66145	104.14	6.41387e-15	4.12682e-13	Mir467e	100124448	2	10505721	10505807	0	0	0	0	0	0	0	0	0	0	0	0	0	0.045043	0	0	0	0	0	0	0	0.0736852	0	0.159098	0.563324	0.447149	0.135636	0.503598	0.245542	0.149867	0	0.331674	0.506298	0.358435	0.25716	0.383661	0	0	0	0
-5.34848	3.61787	161.062	4.51418e-21	8.10067e-19	Mir466p	100526497	2	10506006	10506094	0	0	0	0.0205298	0	0	0.05171	0.0946213	0.0690963	0	0	0	0.0173227	0	0	0	0.026146	0.0147533	0	0.057154	0.0272194	0	0.0162924	0.0442043	0.454145	0.418645	0.371244	0.409727	0.257694	0.153491	0.440164	0.468017	0.467049	0.32195	0.216883	0.24729	0.0153491	0.0186108	0.037957	0
-7.03012	3.01163	237.913	2.94543e-24	8.72919e-22	Gm22051		2	10506555	10506681	0	0	0	0	0.0302034	0	0	0	0	0	0	0	0	0.053569	0	0	0	0	0	0	0	0	0	0	0.410017	0.356939	0.337278	0.510733	0.38892	0.209129	0.515442	0.283744	0.462138	0.404197	0.441123	0.482863	0	0	0	0.0183199
-6.19939	1.62122	73.6932	8.17675e-12	3.92003e-10	Gm22678		2	10506755	10506855	0	0	0	0	0	0	0	0	0.0895418	0	0	0	0	0	0	0	0	0	0	0	0	0	0	0	0.652344	0.585991	0.320079	0.530614	0.257694	0.139952	0.37145	0.151975	0.221708	0.408882	0	0.280084	0	0	0	0
-7.5963	2.49176	171.72	1.08277e-19	1.47077e-17	Mir466	723922	2	10507918	10507990	0	0	0	0	0	0	0	0	0.0820697	0	0	0.0464091	0	0	0	0	0	0	0	0	0	0	0	0	0.416848	0.614247	0.484939	0.507814	0.37615	0	0.285153	0.300751	0.410846	0.482886	0.434805	0.0705564	0	0	0	0
-6.16025	2.58784	155.744	4.60161e-19	5.73296e-17	Gm22091		2	10508453	10508579	0.025655	0	0	0	0	0	0	0.0474074	0.0703316	0.0757217	0	0	0	0	0	0	0	0	0	0	0	0.068784	0	0	0.337445	0.40263	0.467731	0.422864	0.368374	0.0620081	0.347202	0.518133	0.338955	0.268042	0.403007	0.120113	0	0	0	0
-4.58462	1.40476	42.9592	6.8068e-09	2.71163e-07	Mir297c	100124483	2	10509016	10509113	0.321551	0.238725	0	0	0	0	0	0	0	0.329557	0	0	0	0	0	0	0	0	0	0	0	0	0.0732068	0	0.652344	0.6113	0.679324	0.320198	0.0649229	0.149867	0.639366	0.187265	0	0.171852	0.0796528	0	0	0	0.136307	#NUM!
-7.14584	2.18678	148.997	1.8842e-17	1.65269e-15	Mir669c	735273	2	10509296	10509404	0	0	0	0	0	0	0	0	0	0	0	0	0	0	0	0	0	0	0	0	0	0.128714	0	0	0.252478	0.274017	0.360986	0.553924	0.384568	0.184774	0.424106	0.594529	0.483561	0.564641	0.415407	0.205951	0	0	0	0
-5.4524	0.764926	33.1712	2.67748e-07	9.60947e-06	Gm24342		2	10509584	10509687	0	0	0	0	0	0	0	0	0	0.140783	0	#NUM!	0	0	0	0	0	0	0	0	0	0	0	0	0.238231	0.485492	0.715158	0.653268	0	0.345917	0	0.763358	0	0	0.103457	0	#NUM!	0	0	0
-4.64536	1.08461	34.4905	1.16374e-07	4.2707e-06	Gm25263		2	10509885	10509984	0	0	0	0	0	0	0	0.104041	#NUM!	0	0.325473	0	0	0	0	0	0	0	0	0	0.341086	0	0	0	0.360172	0.485492	0.08605	0.738637	0.257694	0	0.347202	#NUM!	0.271622	0.205966	0.103457	0.453545	0	0	0	0
-7.52791	2.44752	134.417	1.33734e-17	1.19992e-15	Mir669a-2	735258	2	10510164	10510260	0	0	0	0	0	0	0	0	0.101913	0	0	0.493249	0	0	0	0	0	0	0	0	0	0	0	0	0.696361	0.550902	0.503461	0.327622	0.396777	0.0842284	0.278922	0.253484	0.217016	0.424075	0.206122	0.147421	0.0501767	0	0	0
-7.766	2.42035	84.5194	2.875e-13	1.53647e-11	Gm22239		2	10510461	10510563	0	0	0	0	0	0	0	0	0.0204962	0	0	0	0	0	0	0	0	0	0	0	0	0	0	0	0.122031	0.118788	0.107297	0.0830569	0.316412	0.232072	0.769753	0.790067	0.679926	0.624075	0.67502	0.608795	0	0.0316609	0	0
-7.62485	2.62649	93.603	2.67256e-14	1.60353e-12	Gm22925		2	10510791	10510892	0	0	0	0	0	0	0	0	0.0895418	0	0	0.0750272	0	0	0	0.0641145	0	0	0	0	0	0	0	0	0.75014	0.601557	0.885943	0.780256	0.0943225	0.116775	0.138801	0.221565	0.183748	0.108787	0.088726	0.140754	0	0.0907514	0	0
-5.86181	1.88314	78.9052	4.70759e-13	2.46205e-11	Gm23542		2	10511370	10511465	0	0	0.0791928	0	0	0	0	0	0	0	0	#NUM!	0	0	0.241701	0	0	0	0	0	0.0860218	0	0	0	0.637567	0.447149	0.343429	0.506824	0.119596	0.0658697	0.166285	0.263851	0.185596	0.23738	0	0.383661	0	0	0	0
-6.06263	2.95339	186.631	3.41271e-22	7.33546e-20	Mir297b	735281	2	10511667	10511775	0	0	0.0315915	0	0.0270265	0	0.0295714	0	0.0953279	0	0	0	0.03815	0	0	0.0436764	0	0	0	0	0.0206913	0	0	0.018906	0.484058	0.56152	0.377048	0.522162	0.106364	0.0251492	0.375484	0.211864	0.303545	0.319438	0.198943	0.268025	0	0.0452635	0	0
-5.07494	1.74286	101.101	1.25327e-15	8.81796e-14	Mir466d	100124465	2	10511967	10512062	0	0	0	0	0.406588	0	0	0	0	0	0	0.195714	0	0	0	0	0	0	0	0	0	0.103059	0	0	0.484058	0.6113	0.216864	0.461321	0.286	0.3059	0.191191	0.323362	0.460798	0.535499	0.320685	0.256961	0	0	0	0
-2.78708	0.600442	11.3049	0.00123121	0.0301784	Gm26092		2	10512203	10512299	#NUM!	0	0	0.135846	0	0.255256	0	0.258362	0.197348	#NUM!	0.12116	0	0	0	0	0	0	0	0	0	0.307335	0	0.291155	0	0.384792	#NUM!	0.596697	0.485076	#NUM!	0	0	0	0.754694	0	0	1	0	0	0	0
-7.21099	2.18213	111.051	1.46998e-15	1.02688e-13	Mir669m-1	100316701	2	10512790	10512887	0	0	0	0	0	0	0	0	0	0	0	#NUM!	0	0	0	0	0	0.0423947	0	0	0	0	0	0	0.63927	0.751215	0.349809	0.552857	0.277297	0.0620081	0	0.573393	0.361349	0.270371	0.266591	0.180375	0	0	0	0
-3.76795	0.234815	13.409	0.000529319	0.0136409	Mir669m-2	100316834	2	10513434	10513531	0	0	0	0	0	0	0	#NUM!	0	0	0	#NUM!	0	0	0	0	0	0	0	#NUM!	#NUM!	0	0	0	0.484058	0.485492	#NUM!	0.585587	0	0	0.881603	0	0.170195	0.509218	0.206122	#NUM!	0	0	0	0
-5.99635	1.27506	106.911	2.41539e-14	1.4627e-12	Mir466n	100526524	2	10513741	10513834	0	0	0	0	0	0	0	0	0	0	0	0	0	0	0	0	0	0	0	0	0	0	0	0	0.584597	0.361497	0.247855	0.34636	0.159209	0.116775	0.553775	0.287355	0.440983	0.320477	0.437861	0.341557	0	0	0	0
-8.63783	3.33925	259.188	4.11412e-25	1.36951e-22	Mir669o	100316702	2	10514300	10514395	0	0	0	0	0	0	0	0	0	0.0383279	0	0.0975955	0	0.0188884	0	0	0	0	0	0.0374318	0	0	0	0	0.448461	0.514087	0.35513	0.429753	0.172385	0.107298	0.466956	0.232705	0.39997	0.265188	0.330349	0.18188	0	0.0237354	0	0
-7.21782	2.21964	143.076	6.7906e-18	6.60353e-16	Mir297a-3	100124482	2	10515820	10515921	0	0	0	0	0	0	0	0	0.123189	0	0	0	0	0	0	0	0	0	0	0	0	0	0	0	0.384792	0.653645	0.526673	0.56111	0.198696	0.0810032	0.313133	0.287355	0.204061	0.151009	0.158836	0.129079	0.0596138	0	0	0
-6.57747	2.52667	161.56	8.84278e-20	1.2267e-17	Mir466l	100316769	2	10516097	10516217	0	0	0	0	0	0	0.0689053	0	0	0	0	0	0.151452	0	0	0	0	0	0	0	0	0	0.0341981	0	0.61356	0.653645	0.367699	0.385758	0.409788	0.149867	0.335051	0.479615	0.305317	0.297117	0.32402	0.35978	0	0	0	0
-7.50044	3.98898	237.297	5.76029e-26	2.29941e-23	Mir297a-4	100124435	2	10517067	10517164	0	0	0	0.0192714	0	0	0.0112572	0	0.0124517	0	0.0261068	0	0	0.0124218	0	0	0	0	0.0132175	0	0	0	0.00950562	0	0.588416	0.640072	0.446059	0.551316	0.215749	0.0714301	0.321008	0.256848	0.28245	0.256978	0.164	0.145541	0	0	0	0
-6.91513	4.27419	317.538	5.53632e-30	3.49324e-27	Gm24806		2	10517337	10517426	0.0103091	0	0	0	0.0250502	0.00969768	0.0115072	0	0.011178	0.0105729	0	0	0.0122116	0	0	0	0	0.0181771	0	0.0305817	0	0.0164055	0.00924877	0	0.528355	0.450505	0.335639	0.551066	0.195791	0.0741856	0.292624	0.43019	0.398882	0.307002	0.314403	0.195106	0	0.0129981	0	0
-6.6044	3.81764	217.408	1.97328e-24	6.12657e-22	Mir669i	100316668	2	10517604	10517730	0	0	0.0172176	0	0.0193815	0.0263457	0	0	0	0.042775	0	0.108472	0	0.038332	0	0	0	0	0	0	0.00958296	0.00898956	0.0175451	0.0259885	0.40293	0.546633	0.429619	0.445987	0.150967	0.171076	0.332722	0.202976	0.338955	0.373808	0.181222	0.14935	0	0	0.016628	0
-6.26223	1.51577	135.116	1.37011e-16	1.07197e-14	Mir669h	100316831	2	10518155	10518279	0	0	0	0	0	0	0	0	0	0.0757217	0	0	0	0	0	0	0	0	0	0	0	0	0	0	0.484058	0.447149	0.484939	0.255153	0.609708	0.149867	0.431757	0.281095	0.338955	0.599793	0.46394	0.535477	0	0	0	0
8.26692	8.40018	39.0947	1.70853e-08	6.61761e-07	Gm13341		2	22587291	22587962	1	#NUM!	#NUM!	0.653549	0.997655	0.996875	0.996619	0.996737	#NUM!	#NUM!	0.325473	#NUM!	1	0	1	1	0.995942	0.998263	0.997491	0.99902	0.99938	0.995499	0.998302	0.99681	0.894111	1	0	0.485076	0.996362	0.998316	0.997508	0.997948	0.998431	0.997318	0.997048	0.99794	0.655385	0.791352	1	1
4.57377	12.2605	30.216	4.2325e-07	1.48899e-05	Gm13340		2	22588103	22589647	0.825571	0.825903	0.831642	0.833064	0.999442	0.999512	0.999539	0.99938	0.815629	0.697448	0.810904	0.667563	0.80737	0.813586	0.818867	0.8309	0.999317	0.999325	0.999671	0.999478	0.999414	0.999504	0.999389	0.999318	0.862014	0.862303	0.804388	0.816262	0.999593	0.999091	0.999436	0.999374	0.999735	0.999317	0.999383	0.999569	0.857644	0.865555	0.810757	0.814584
9.5015	8.59915	74.8549	3.45446e-13	1.83114e-11	Gm13339		2	22590024	22590533	0.979063	0.898406	1	0.941296	1	0.998329	1	0.999636	0.958527	0.848891	0.959421	0.899218	1	0.987682	0.981984	0.991314	0.999737	0.999638	0.999132	0.997092	0.999506	0.999691	1	1	0.982255	0.984197	0.941999	0.984849	0.999795	0.998827	0.999725	0.999779	0.99946	1	0.999555	0.99973	0.941743	0.985948	0.962359	0.955386
2.01353	4.18261	13.4836	0.000426611	0.0111857	Gm13669		2	75808358	75808814	0.493291	0.450595	0.508535	0.554572	1	0.974611	1	0.990131	0.443646	0.324255	0.42372	0.453616	0.571309	0.392787	0.378305	0.483236	0.962012	0.991949	0.977436	0.988842	0.977255	1	1	1	0.509072	0.399787	0.575513	0.3446	0.964712	0.953983	0.977315	1	0.992667	0.98071	0.988928	0.990817	0.332023	0.330588	0.464669	0.388192
4.35448	0.289805	16.8846	0.000107289	0.00301952	Gm13771		2	91641685	91641922	1	1	1	#NUM!	1	1	1	1	#NUM!	0	#NUM!	#NUM!	#NUM!	0	#NUM!	#NUM!	0.805243	1	1	1	1	1	0.672531	1	0.319311	1	#NUM!	#NUM!	0.510154	1	1	#NUM!	0.561767	0.805835	1	1	#NUM!	0	#NUM!	#NUM!
1.38646	2.90754	14.0816	0.0003249	0.00864631	Gatm	67092	2	122594467	122611303	0.778134	0.617259	0.91233	0.585888	0.637926	0.885212	0.588605	0.635281	0.424497	0.726356	0.103786	0.842605	0.588117	0.509247	0.607022	0.561171	0.697504	0.753375	0.706448	0.656164	0.693141	0.644088	0.852422	0.609511	0.720675	0.758766	0.910462	0.94281	0.488405	0.46849	0.244568	0.323362	0.672241	0.23738	0.749113	0.599771	0.596639	0.570348	0.878929	0.646679
6.5449	2.08736	15.8534	0.000198308	0.00540238	Erv3	71995	2	131853678	131859747	1	1	1	1	1	1	1	1	0.917669	1	0.62809	1	1	1	1	1	1	1	1	1	#NUM!	1	1	1	1	1	0.992678	1	1	0.514025	1	1	1	#NUM!	1	0	1	1	1	1
0.781415	6.07053	18.9738	3.79357e-05	0.00112598	H13	14950	2	152669461	152708670	0.468025	0.49853	0.530128	0.536591	0.729573	0.744336	0.76684	0.704187	0.456578	0.514461	0.602194	0.518553	0.507403	0.474115	0.484052	0.516957	0.783445	0.759483	0.778627	0.732637	0.734775	0.741421	0.74933	0.74805	0.405743	0.426115	0.473763	0.510249	0.691152	0.785069	0.730825	0.730374	0.697141	0.727592	0.704968	0.733865	0.4934	0.512092	0.493455	0.520066
-1.0385	3.13818	17.6203	6.78049e-05	0.00195039	Mcts2	66405	2	152687035	152687946	0.436795	0.229039	0.255961	0.367263	0.204416	0.329651	0.544515	0.311264	0.343174	0.261998	0.176584	0.317199	0.124947	0.333846	0.284911	0.0671051	0.292516	0.299232	0.229556	0.30635	0.408353	0.375175	0.354882	0.405388	0.208044	0.320561	0.214173	0.238972	0.526266	0.49678	0.364183	0.434404	0.238589	0.287494	0.67502	0.156981	0.264596	0.321617	0.274713	0.218705
-1.48164	3.96159	36.4729	4.29006e-08	1.62309e-06	Nnat	18111	2	157560078	157562522	0.339256	0.315611	0.304581	0.282126	0.291334	0.25253	0.115942	0.217081	0.576584	0.216348	0.299153	0.108472	0.371403	0.408374	0.258005	0.428766	0.292516	0.291218	0.177544	0.602963	0.239596	0.246685	0.289371	0.218848	0.46487	0.465532	0.604738	0.432349	0.234486	0.281479	0.261763	0.111568	0.43903	0.368539	0.337169	0.387069	0.15979	0.161101	0.228341	0.376383
-1.36518	2.15351	12.5979	0.000641378	0.0163564	Gm23134		2	157562361	157562447	0.344954	0.267856	0.239744	0.300078	0.235665	0.296091	0.187148	0.343208	0.495836	0.109439	0.256316	0.0956768	0.143825	0.266231	0.201047	0.48956	0.340728	0.337364	0.171002	0.755594	0.564103	0.0859312	0.283127	0.285831	0.369632	0.430162	0.556611	0.485076	0.178287	0.514025	0.54169	0.101677	0.594323	0.397688	0.624299	0.805821	0.0988706	0.0922225	0.415267	0.487639
-0.67928	7.10583	29.2527	6.09589e-07	2.11411e-05	Zfp64	22722	2	168893331	168955587	0.396914	0.411468	0.367196	0.35484	0.401671	0.418891	0.397044	0.330946	0.436117	0.471083	0.470161	0.402249	0.383995	0.389607	0.349914	0.384364	0.400842	0.2682	0.382094	0.325293	0.388777	0.396201	0.2893	0.344293	0.494853	0.387056	0.498847	0.486799	0.372947	0.428507	0.392971	0.461097	0.380387	0.463217	0.476184	0.38516	0.499532	0.409087	0.343676	0.418105
-2.45907	2.53708	21.3051	1.42592e-05	0.000437161	Gm9873		2	169020025	169021385	0	0	0	0	0.185926	0.530748	0.341253	0.148344	0.0679036	0.149337	0.0345088	0	0	0.0286356	0	0	0	0	0.118576	0	0.478346	0.52057	0.193289	0.480513	0.113425	0.0903525	0.0887539	0.118614	0.54854	0.577847	0.252873	0.455431	0.271622	0.318292	0.744112	0.356217	0.230936	0	0	0.229241
-3.76783	-0.126245	12.0358	0.00133357	0.0324033	Mir296	723906	2	174267047	174267125	0	0	0	0	0	#NUM!	#NUM!	0	#NUM!	#NUM!	#NUM!	#NUM!	#NUM!	#NUM!	#NUM!	#NUM!	#NUM!	0	#NUM!	#NUM!	#NUM!	#NUM!	0	#NUM!	#NUM!	0	#NUM!	#NUM!	#NUM!	#NUM!	0	0	0	#NUM!	0	#NUM!	#NUM!	#NUM!	0	#NUM!
-6.47174	4.65565	447.186	5.14399e-35	5.5898e-32	Nespas	56802	2	174281237	174295436	0.0142653	0.00672256	0.012623	0.00608743	0.00708661	0.0197629	0.00729438	0.00822623	0.0393652	0.0450134	0.0137932	0.0716295	0	0.0213058	0.0277518	0	0	0.0143378	0.0149407	0.0171665	0.0131826	0.0187903	0.0154353	0.014857	0	0.0173318	0.00826317	0.0542315	0.0264499	0.0470982	0	0.0290022	0	0.0246818	0.0488996	0	0.0284266	0.0293725	0.0341267	0.0317761
-2.71932	0.669085	15.9803	0.000188226	0.00514924	Gm27899		2	174286608	174286671	0	0	0.321123	0	0	0	0	0.258362	0	1	0	0.327359	0	0	0	0	0	0	0	0	0	0	0	0	0	0	0	0	0	0	0	0	0	0	0	0	0	0	0	0
4.72113	2.27824	39.8155	1.67653e-08	6.50653e-07	Gm8775		3	4211718	4213044	0.739834	0.714994	1	1	1	1	1	1	0.710874	1	1	1	1	0.452185	0.827023	1	1	1	1	1	1	1	1	1	0.911662	1	1	1	0.946538	0.938789	1	1	1	1	1	1	0.516851	0.486703	1	1
-1.14668	2.97282	16.6015	0.000105667	0.00298247	Gm40040		3	41477577	41482391	0.235139	0.319904	0.215475	0.320469	0.446756	0.305878	0.350124	0.380715	0.290671	0.371015	0.634646	0.474743	0.32903	0.123962	0.0416542	0.242251	0.44817	0.270218	0.331131	0.266707	0.0382943	0.292607	0.165796	0.458137	0.369632	0.421681	0.206614	0.520001	0.336278	0.587734	0.414916	0.650016	0.406061	0.463703	0.509457	0.435249	0.427633	0.264521	0.171593	0.271362
-1.05524	3.5527	26.6944	1.63415e-06	5.41762e-05	Platr4	78706	3	41484024	41493192	0.369799	0.179508	0.348415	0.49758	0.339445	0.21519	0.373331	0.305576	0.593209	0.511532	0.62942	0.500098	0.322474	0.190832	0.139978	0.442056	0.362451	0.196386	0.340234	0.323618	0.21635	0.27943	0.224582	0.284628	0.671006	0.59723	0.506687	0.500702	0.488405	0.365017	0.367176	0.648297	0.487773	0.41683	0.549066	0.493567	0.368211	0.340888	0.33261	0.331063
-1.41912	2.22768	33.3936	1.30139e-07	4.76688e-06	Gm6069		3	41485733	41486195	0.334145	0.319904	0.239744	0.273932	0.218931	0.194805	0.408533	0.207152	0.46644	0.510894	0.475966	0.576755	0.379632	0.320502	0.488811	0.291303	0.205348	0.238563	0.204989	0.340046	0.267613	0.20542	0.33925	0.308423	0.532545	0.562695	0.606402	0.463384	0.421638	0.383548	0.476925	0.452692	0.537518	0.49493	0.368762	0.354526	0.240678	0.208476	0.344718	0.251447
-2.37487	1.83694	23.237	6.78267e-06	0.000214675	2400006E01Rik		3	41521247	41528474	0.221408	0.413686	0.45289	0	0	0.133625	0.121375	0	0.274448	0.450324	0.616623	0	0.119709	0.0728831	0	0.39002	0	0	0	0.255678	0	0	0.113756	0.0610657	0.445729	0.505499	0.604738	0.485076	0.172385	0.316357	0.249484	0.226756	0.338955	0.287494	0.315809	0.223715	0.240678	0.362616	0.225621	0
-2.45187	8.44156	200.178	9.47541e-24	2.53889e-21	Jade1	269424	3	41555731	41616864	0.171266	0.179681	0.220768	0.192145	0.13004	0.12448	0.121416	0.105008	0.283552	0.252657	0.544036	0.400943	0.165048	0.127471	0.270177	0.173747	0.10436	0.0879857	0.0906504	0.121117	0.111582	0.131566	0.101718	0.120537	0.535461	0.503353	0.526613	0.534319	0.451513	0.452257	0.475372	0.488643	0.46107	0.458621	0.467434	0.438149	0.185849	0.178109	0.216394	0.235374
-4.852	3.22291	99.6119	1.15645e-15	8.22548e-14	Gm31266		3	41562279	41563698	0.0413066	0	0.122926	0.0314998	0	0	0	0.0622266	0.389969	0.205537	0.75741	0.267403	0.0956515	0	0.256085	0.261093	0.019865	0	0	0	0.0188115	0	0.0281125	0.0266542	0.588087	0.685292	0.642009	0.648483	0.37938	0.260668	0.248651	0.43074	0.34465	0.311424	0.330903	0.260355	0	0	0.131572	0.0734842
3.07803	1.08956	15.2184	0.000199541	0.00542841	Tdo2	56720	3	81957090	81976202	1	1	1	0.738877	0.860462	1	1	0.511027	1	1	1	1	0	1	1	1	0.756154	1	0.643483	0.911545	#NUM!	#NUM!	0.959379	1	0.918423	1	1	0.758461	1	0.413539	0.515442	0.349649	0.62133	0.633602	0.480023	0	1	1	1	1
4.79932	2.98276	25.7774	2.34177e-06	7.67603e-05	Rpl36a-ps2		3	145879020	145879340	0.486626	0.190408	0.386764	0	1	1	1	1	0.123189	0.197287	1	1	0	0.430096	0.656646	1	1	0.988306	0.985303	1	0.985357	1	0.987669	0.987673	0.135223	0	0	0.385758	1	1	0.944505	0.946643	0.969504	0.983081	1	1	0	0.127305	1	0.740613
2.97537	5.08872	32.4788	2.36595e-07	8.53836e-06	Gm11407		4	80002331	80003388	0.673531	0.760032	0.808966	0.689922	1	1	0.995124	1	0.787279	0.710795	0.773487	0.645295	0.804119	0.785974	0.791408	0.805221	1	1	1	1	1	1	1	1	0.853752	0.888168	0.783532	0.777728	1	1	1	1	1	1	1	1	0.828582	0.871954	0.773185	0.788157
2.70523	7.42146	11.9637	0.000907334	0.022695	Gm11408		4	80003396	80003914	0.541306	0.434603	0.52216	0.533952	1	0.998122	1	1	0.47578	0.420693	0.446167	0.3517	0.516325	0.546313	0.453604	0.62773	1	1	1	1	1	1	1	1	0.356579	0.39585	0.445835	0.395001	0.998426	0.997622	1	0.999064	1	1	1	1	0.431283	0.467587	0.506655	0.497801
2.94204	4.02904	28.1622	1.05929e-06	3.58472e-05	Gm11410		4	80003989	80005131	1	1	1	1	0.837101	0.844401	0.790867	0.88573	1	1	1	1	1	1	1	1	0.840689	0.705073	0.841129	0.755594	0.727707	0.701802	0.854882	0.835889	0.97525	1	1	1	0.776363	0.764789	0.785117	0.836609	0.825094	0.801121	0.796125	0.770459	1	1	1	1
0.923108	7.86502	16.8678	9.40451e-05	0.00267762	Errfi1	74155	4	150853919	150868892	0.722806	0.63862	0.635379	0.67157	0.644104	0.66727	0.651772	0.613564	0.665293	0.689673	0.672394	0.592992	0.657197	0.665753	0.655786	0.705269	0.628939	0.640794	0.651924	0.614918	0.645093	0.632018	0.642294	0.653678	0.675427	0.704182	0.648843	0.644409	0.584895	0.616083	0.601607	0.570606	0.616224	0.564161	0.611601	0.60101	0.69238	0.623479	0.683345	0.695451
-0.873604	4.63929	19.4033	3.16128e-05	0.000944041	C330024D21Rik	320479	5	67463897	67477632	0.507102	0.28254	0.389829	0.334321	0.336665	0.30245	0.374112	0.220451	0.205599	0.410285	0.383552	0.331071	0.370381	0.325904	0.387285	0.330895	0.447562	0.210785	0.44919	0.331629	0.311089	0.335907	0.284587	0.21906	0.522575	0.501623	0.39725	0.538042	0.428522	0.489873	0.442933	0.405908	0.381685	0.408882	0.416572	0.433471	0.458065	0.203366	0.434551	0.272691
2.09658	4.39117	16.1572	0.000128459	0.00357929	Naa11	97243	5	97382198	97392379	0.675891	0.484738	0.261865	0.497012	0.978365	0.985692	0.776697	0.911323	0.502329	0.274372	0.243387	0.604674	0.810736	0.825076	0.453999	0.428766	0.934265	0.953194	0.632213	0.72602	0.965461	0.791307	0.847895	0.941263	0.531773	0.511826	0.575089	0.535909	0.38769	0.54544	0.375748	0.485897	0.391118	0.450893	0.45226	0.436636	0.15247	1	0.407815	0.36936
4.03241	2.41669	16.0723	0.000163333	0.00449972	Spp1	20750	5	104435118	104441050	0.825769	0.924414	1	0.882981	1	1	1	1	1	0.938416	1	0.91799	1	1	1	1	1	1	1	1	1	1	1	1	1	1	1	1	1	1	1	1	1	1	1	1	1	0.654741	0.825619	1
-3.40464	0.930937	17.5332	7.7628e-05	0.00222292	Fkbp6	94244	5	135291704	135350044	0	0	0	0	1	0	0	0.258362	0.109477	0.246818	0	0	0	0	0	0	0	0	0	#NUM!	1	0	0	0	0.0673115	0	0.260939	0	0.257694	0	0.150591	0	0	0.0739134	0.114903	0.171839	0	0	0.52488	0
0.594596	6.00614	13.2393	0.000477131	0.012427	Casd1	213819	6	4600839	4643355	0.501004	0.513062	0.545661	0.47346	0.66563	0.663681	0.697299	0.746372	0.482047	0.57101	0.519363	0.604421	0.494392	0.545105	0.445123	0.484709	0.655166	0.69208	0.73737	0.670822	0.657571	0.685339	0.722195	0.704484	0.502579	0.493754	0.489361	0.504689	0.661927	0.634671	0.691348	0.690043	0.682537	0.671614	0.739993	0.7181	0.509524	0.494314	0.530204	0.455986
-2.68123	5.34537	81.1803	6.67654e-14	3.84097e-12	Sgce	20392	6	4674350	4747207	0.0757148	0.184023	0.16291	0.158703	0.175709	0.0688361	0.0948347	0.143261	0.052266	0.242039	0.125667	0.174597	0.035319	0.127451	0.144852	0.0900847	0.0775218	0.00640333	0.0902234	0.0527644	0.0787122	0.086894	0.0341981	0.17911	0.0513477	0.117381	0.103288	0.079839	0.111754	0.171076	0.238306	0.310446	0.0399153	0.138418	0.0978156	0.10336	0.241954	0.228	0.170856	0.124383
-8.4829	12.6114	372.707	2.67213e-32	2.27247e-29	Peg10	170676	6	4747306	4760517	0.00411704	0.00304962	0.00186514	0.00237245	0.00261657	0.00281288	0.00304812	0.00227545	0.00316068	0.00115386	0.00361289	0.00160777	0.00206149	0.00346696	0.00231966	0.00396627	0.00253368	0.00216037	0.00175401	0.00210266	0.00228142	0.00205154	0.00316418	0.00286461	0.00331012	0.00298432	0.00318651	0.0033204	0.00300391	0.00360419	0.00285893	0.00292559	0.00239538	0.00351979	0.0042184	0.00250557	0.00270716	0.00252133	0.00276917	0.00432994
1.42197	5.98596	76.7484	2.09729e-13	1.13953e-11	Ppp1r9a	243725	6	4902917	5165661	0.691248	0.709806	0.735379	0.796003	0.739918	0.735098	0.726396	0.692074	0.703486	0.747145	0.726718	0.854765	0.761928	0.694029	0.781122	0.766251	0.67517	0.702358	0.752329	0.7842	0.72694	0.796822	0.719665	0.697724	0.767435	0.790551	0.743788	0.787475	0.766139	0.783852	0.781718	0.791451	0.760261	0.743581	0.800575	0.771905	0.76625	0.671605	0.744231	0.785635
1.06446	2.11874	11.0535	0.00132349	0.0321982	Gm26814		6	4942147	4946295	0.684206	0.714994	0.813147	0.423167	0.540141	0.711628	0.633266	0.806965	0.710874	0.710795	0.720158	0.76882	0.826376	0.715554	0.756556	0.803	0.458204	0.289419	0.584446	0.925184	0.861338	0.78352	0.773903	0.592972	0.929253	0.838445	0.809045	0.691104	0.851368	0.70413	0.944505	0.502007	0.8602	0.75685	0.721944	0.81804	0.760171	0.532235	0.634503	0.740613
1.31142	5.23111	69.722	1.37926e-12	6.91751e-11	Pon2	330260	6	5264147	5298455	0.712858	0.779145	0.758157	0.76998	0.650982	0.633814	0.702906	0.672707	0.447161	0.754251	0.779306	0.768993	0.74634	0.784065	0.743858	0.701861	0.692408	0.669088	0.602796	0.632682	0.732084	0.676735	0.622913	0.673962	0.767768	0.719197	0.760015	0.588024	0.651661	0.672605	0.59943	0.740638	0.655709	0.792455	0.672255	0.724573	0.777115	0.729795	0.738502	0.761784
2.82746	6.07638	27.446	1.21986e-06	4.09973e-05	Asb4	65255	6	5383386	5433022	0.82993	0.928865	0.870177	0.891808	0.860144	0.845771	0.849788	0.900014	0.721666	0.908306	0.920512	0.922588	0.856104	0.872639	0.883634	0.944763	0.868035	0.924351	0.871155	0.975722	0.767313	0.812522	0.830298	0.822529	1	0.823496	0.97281	0.899056	0.847153	0.873018	0.899144	0.892969	0.974322	0.811898	0.881372	1	0.891902	0.883871	0.905274	0.8975
-6.53628	6.27876	169.441	1.11196e-21	2.2481e-19	Mest	17294	6	30723547	30748465	0.0122129	0.00978523	0.0079871	0.00661003	0.014046	0.00541092	0.012972	0.0127072	0.0289399	0.00481481	0.0121595	0.00858539	0.0250821	0.00262813	0.0122662	0.00494483	0	0.0121194	0.00557407	0.0190728	0.0202293	0.0150159	0.0124177	0.00734328	0	0.0195457	0.0196389	0.018224	0.0110745	0.0163419	0.0189399	0.0149404	0.0113913	0.0051355	0.0437235	0	0.00858329	0.00832122	0.0125971	0.00865606
-4.34937	0.097636	17.4008	0.000142894	0.00395895	Mir335	723930	6	30741299	30741396	0	0	0	0	0	0	#NUM!	0	#NUM!	0	#NUM!	0	#NUM!	#NUM!	1	0	#NUM!	#NUM!	#NUM!	#NUM!	0	0	#NUM!	0	#NUM!	#NUM!	#NUM!	#NUM!	0	0	0	0	#NUM!	0	#NUM!	#NUM!	#NUM!	#NUM!	0	0
3.32643	2.51298	27.0588	1.41776e-06	4.73231e-05	Klf14	619665	6	30956023	30959078	1	1	1	0.796233	0.963927	1	0.89234	0.819128	1	0.944316	0.928714	0.931633	1	0.964736	1	1	0.870445	0.670673	1	1	1	0.949016	1	0.929483	1	0.767583	1	0.824874	0.975971	0.915552	0.966354	0.877087	1	1	0.838522	1	0.96183	0.946067	0.899	1
4.80562	0.29573	13.6199	0.00071135	0.0180701	Igkc		6	70726435	70726966	#NUM!	#NUM!	1	1	1	1	1	1	#NUM!	#NUM!	#NUM!	#NUM!	#NUM!	#NUM!	#NUM!	#NUM!	1	1	1	1	#NUM!	1	1	#NUM!	1	1	1	1	1	#NUM!	1	#NUM!	1	1	#NUM!	1	#NUM!	1	#NUM!	#NUM!
3.05815	4.48756	22.5283	8.62306e-06	0.000269006	A2m	232345	6	121635376	121679227	0.944636	0.869636	0.621184	0.784394	0.736121	0.995161	0.896663	0.916483	0.867664	0.646113	0.809797	0.488746	0.791999	0.5481	0.713153	0.418375	0.933891	0.957268	0.994758	0.992235	0.931815	0.831903	0.994176	0.685118	0.896398	0.68767	0.921907	0.836278	0.942965	0.626852	0.66185	0.744805	0.983512	0.956119	0.7928	0.935586	0.926209	0.415595	0.830855	0.847372
4.86309	6.4129	278.95	3.65468e-28	1.78714e-25	Zim1	22776	7	6671269	6696450	0.971909	0.974729	0.972936	0.981338	0.97196	0.920501	0.968198	0.96166	0.949203	0.987136	0.970494	0.99042	0.975878	0.979638	0.961846	0.954572	0.957736	0.985916	0.965581	0.985998	0.960054	0.972146	0.9558	0.978223	0.962904	0.97883	0.967079	0.960628	0.958368	0.977908	0.968506	0.968988	0.975982	0.943962	0.949428	0.965706	0.975218	0.977886	0.975162	0.958499
-8.39438	10.4257	345.035	3.55778e-31	2.67654e-28	Peg3	18616	7	6703892	6730431	0.0035299	0.00374531	0.00225661	0.00293098	0.00286026	0.00276331	0.0027534	0.00237915	0.0169508	0.0141215	0.00230391	0.0275686	0.00170609	0.00254769	0.00158289	0.00214582	0.00361839	0.00203823	0.00251055	0.00457347	0.000996562	0.00346425	0.00314452	0.00400338	0.00257168	0.00357318	0.00378454	0.00509761	0.00527822	0.00807987	0.00519967	0.00551552	0.00152204	0.00326651	0.00577295	0.00484912	0.00271573	0.0017996	0.00285675	0.00146081
-3.49778	1.85871	48.0098	1.00634e-09	4.21498e-08	Usp29	57775	7	6730578	6967219	0.0528139	0	0	0.129623	0	0.170569	0.103234	0.207152	0	0.300752	0	0.0713602	0	0	0	0	0.205348	0.126991	0.720549	0.204853	0	0	0.278016	0.206443	0.135223	0.653645	0.370455	0.178572	0.12193	0.174607	0.0784249	0.114285	0.450673	0.108787	0.193332	0.425634	0	0	0.159227	0.169398
3.31338	0.191145	12.2042	0.000829185	0.0208737	Gm17791		7	41325815	41327315	1	1	#NUM!	1	0	1	#NUM!	1	1	1	1	1	1	1	1	1	0	#NUM!	#NUM!	#NUM!	1	1	#NUM!	1	1	1	1	0.790274	0.675632	#NUM!	#NUM!	0	#NUM!	#NUM!	1	0.509195	1	0.791352	1	1
-2.77095	0.281873	10.3632	0.00186363	0.0445086	Lin7b	22342	7	45367891	45370583	#NUM!	0	0.321123	0	#NUM!	0	0	0	0.662955	1	0	1	0	0	#NUM!	0.48956	#NUM!	1	1	1	0.608296	#NUM!	0.33925	0.757387	0	0	0	1	0.510154	0.679017	1	1	1	0.509218	1	0.509195	0.387978	0	0.486366	0.655588
-1.42113	6.50013	165.696	2.0678e-21	4.08547e-19	Snhg14	16353	7	59307924	59975759	0.239224	0.275589	0.210157	0.260725	0.345023	0.336878	0.240028	0.288488	0.279502	0.234699	0.271556	0.200336	0.264364	0.200899	0.276347	0.246297	0.355967	0.227077	0.301477	0.217264	0.263038	0.261825	0.251384	0.234337	0.276423	0.24581	0.222727	0.228921	0.274948	0.24696	0.27287	0.292815	0.267199	0.269391	0.265909	0.30491	0.235265	0.262121	0.248497	0.308997
-8.23408	6.30375	1110.35	2.14947e-48	3.50363e-45	Gm38393		7	59974149	60005064	0.00250801	0.00280874	0.00268041	0.00754908	0.00604463	0.0025576	0	0	0.00774495	0.00235766	0	0.00392524	0.00915727	0.0063621	0.00537336	0.011596	0	0	0	0	0.00182903	0.00163099	0.00202926	0.0017666	0.00225563	0.00545615	0	0.00247942	0.0127565	0	0.00734977	0.00519262	0.00450724	0.00431352	0.00614391	0	0.00585342	0.00302021	0.00770179	0.00795654
-7.03391	5.3003	534.44	5.53907e-37	6.77151e-34	Snrpn	20646	7	59982495	60140219	0.0161717	0.0103448	0.0105179	0.015735	0	0	0	0	0.00468361	0.00983269	0.0082861	0.0332127	0.0135436	0.0292702	0.028869	0.018638	0	0	0	0	0	0.00478677	0.0047755	0	0.0132881	0.00443125	0.0282952	0.012683	0.0200121	0	0.00827399	0.00411859	0.00361063	0	0	0	0.00980799	0.0228765	0.00493319	0
-2.74135	2.19129	25.7574	2.36037e-06	7.72055e-05	Ndn	17984	7	62346569	62350262	0.15091	0.238725	0.0864277	0.168133	0.106015	0.128077	0.128927	0.0496601	0.211494	0.042775	0	0.0718619	0.174602	0.224964	0	0	0	0.253406	0.255838	0.451878	0	0.508383	0.185795	0	0.0673115	0.0790051	0	0.0525043	0.0556688	0.0220093	0	0	0	0.114806	0	0.315583	0.208947	0.0929761	0	0
-4.05683	1.27788	19.0399	4.18221e-05	0.00123758	Magel2	27385	7	62377010	62381640	0	0.319904	0	0	0	0	0	0.148344	0.329642	0.0952948	1	0.0129827	0	0	0	0	#NUM!	1	0	#NUM!	0	0.171377	0	0	0	0	0	0	0.0433193	0	0	0	0	0	0	0	0	0	0.119155	#NUM!
6.09547	2.17372	33.9714	2.84128e-07	1.01601e-05	Hbb-bt	101488143	7	103812524	103813996	1	1	1	1	1	1	1	1	1	1	1	0.708742	#NUM!	1	1	1	1	1	1	1	1	1	1	1	1	1	0.973488	0.986401	1	0.873018	1	1	1	1	1	1	1	1	1	1
5.85059	12.9184	281.578	2.70926e-28	1.3588e-25	H19	14955	7	142575529	142578143	0.992863	0.991282	0.990121	0.990279	0.976458	0.98844	0.945288	0.99048	0.902885	0.971204	0.984079	0.990198	0.994679	0.992124	0.987638	0.991846	0.990882	0.994522	0.992727	0.992201	0.992731	0.993268	0.993697	0.991354	0.973769	0.985422	0.943272	0.957902	0.95657	0.942573	0.956045	0.953326	0.971394	0.959616	0.9593	0.932118	0.994593	0.995142	0.990223	0.988777
6.05434	8.6007	342.289	4.64235e-31	3.36312e-28	Gm27483		7	142576853	142576923	0.99426	0.992594	0.988635	0.99157	0.980546	0.990786	0.954987	0.995777	0.905522	0.961908	0.987022	0.991186	0.99842	0.989032	0.990315	0.990678	0.995267	0.992158	0.991691	0.993846	0.99438	0.994173	0.993683	0.993608	0.979214	0.98687	0.93511	0.965981	0.954112	0.953421	0.94885	0.957854	0.977686	0.965268	0.961869	0.938645	0.991948	0.997105	0.988772	0.986784
5.79608	9.72718	250.253	1.1155e-26	4.7433e-24	Gm27786		7	142577849	142577918	0.993115	0.99494	0.989182	0.991088	0.971886	0.987821	0.942475	0.993346	0.909102	0.976941	0.983112	0.991225	0.995748	0.994866	0.989506	0.99223	0.988946	0.994714	0.991225	0.994424	0.991342	0.992325	0.995879	0.989753	0.973096	0.986915	0.949596	0.956145	0.956775	0.935953	0.956008	0.951466	0.968804	0.952908	0.963941	0.928826	0.99525	0.993857	0.988617	0.987315
-3.53819	10.7115	193.744	2.45686e-23	5.93286e-21	Igf2	16002	7	142650766	142666816	0.115727	0.0922301	0.0744197	0.0848767	0.0538229	0.0815716	0.0625362	0.0676398	0.138808	0.0642957	0.103082	0.0123555	0.0829086	0.0874964	0.110235	0.120432	0.102757	0.0551634	0.091037	0.0538885	0.0774986	0.0537122	0.0517415	0.0521898	0.0506157	0.052093	0.0450815	0.0472557	0.0122981	0.0191849	0.0177797	0.01289	0.0184133	0.0197259	0.0156999	0.0252654	0.0917933	0.0793458	0.0824024	0.0920527
-2.49588	6.02478	123.457	4.72948e-18	4.79319e-16	Igf2os	111975	7	142659693	142670356	0.244573	0.206199	0.115326	0.2216	0.102747	0.094555	0.106143	0.113501	0.228283	0.190106	0.145519	0.0225006	0.193347	0.168632	0.175028	0.172527	0.116473	0.100801	0.157911	0.0869149	0.10739	0.111085	0.10385	0.127654	0.15687	0.156623	0.0899832	0.101449	0.016416	0.0282376	0.0606658	0.0521755	0.0363144	0.0361048	0.0331047	0.0328965	0.163218	0.238897	0.183428	0.170082
3.78592	2.11002	29.0073	7.71296e-07	2.64213e-05	Th	21823	7	142892752	142931128	1	0.484738	1	1	1	1	1	1	0.887233	1	1	1	1	1	1	1	1	0.906309	1	1	1	0.608021	0.951244	1	0.548775	0.756122	0.71674	0.614526	0.765981	0.783852	1	0.950871	0.851695	0.834933	0.886224	0.873681	1	1	0.86891	1
6.53604	6.10924	150.531	2.81852e-20	4.24079e-18	Ascl2	17173	7	142966829	142969264	0.981828	0.965999	0.991965	0.993228	0.985385	0.993844	0.995381	1	0.937355	0.932903	0.983403	0.958113	0.950096	0.977096	0.992603	0.988983	0.985696	0.914997	1	0.992828	0.990115	0.888069	0.984412	0.997597	0.755261	0.778258	0.835962	0.873873	0.746698	0.834429	0.852988	0.936287	0.740866	0.821791	0.836452	0.813766	0.976204	0.922601	0.993402	0.991708
3.7552	0.15777	11.5514	0.00117583	0.0288935	Tspan32	27027	7	143005046	143019644	#NUM!	1	#NUM!	1	#NUM!	1	1	1	#NUM!	1	1	1	0.655627	1	1	1	#NUM!	1	#NUM!	#NUM!	#NUM!	1	#NUM!	#NUM!	1	0.485492	0	1	0.54854	0.413539	0	1	0	1	0.509457	#NUM!	#NUM!	#NUM!	1	0.655588
2.52906	2.02579	26.3689	1.85605e-06	6.14285e-05	Cd81	12520	7	143052739	143067934	1	1	0.947298	0.781859	0.774055	1	0.644522	0.676397	0.970963	0.830953	0.906107	0.731572	1	0.964736	1	0.861766	0.67398	0.717962	0.918997	0.673313	0.911917	0.77513	0.89148	0.649117	0.816731	0.883025	1	0.963473	0.257694	0.47551	0.577642	0.300751	0.845426	0.67481	0.446831	0.919434	0.74044	0.941586	0.883386	1
4.20247	3.40893	40.5822	1.02299e-08	3.99393e-07	Trpm5	56843	7	143069153	143094642	0.943144	1	0.977049	1	0.965217	0.911365	0.914574	0.931443	0.970109	0.830953	1	0.81957	0.826376	0.825076	1	1	0.961252	0.880297	1	1	0.93546	0.870495	1	0.931166	0.638182	0.886166	0.756514	0.801481	0.625418	0.713108	0.852988	0.744805	0.649435	0.575073	0.798411	0.800461	0.900334	0.908726	0.952119	0.875667
3.75017	3.1174	119.53	1.05177e-17	9.84336e-16	Tssc4	56844	7	143069249	143071093	0.955213	0.96578	0.979695	0.931126	0.881674	0.856399	0.970721	0.901426	1	0.873124	1	0.817433	0.916959	0.918833	0.94783	0.974596	0.854171	0.843313	0.796716	0.878251	0.850616	0.841728	0.955682	0.717807	0.826076	0.835306	0.79524	0.89853	0.476789	0.559328	0.680253	0.811358	0.74255	0.530028	0.656727	0.763464	0.866061	0.95554	0.929858	0.961158
4.81066	0.5622	31.2642	6.85841e-07	2.3618e-05	Kcnq1	16535	7	143106362	143427042	1	1	1	1	1	1	1	1	1	1	1	1	1	1	1	1	1	0.50452	1	0.632018	1	1	1	1	1	1	1	0.653268	1	0.808827	1	0.263851	1	0.67481	1	0.756834	1	1	#NUM!	1
-5.60558	9.06301	808.424	2.51778e-44	3.5177e-41	Kcnq1ot1		7	143203458	143296549	0.016632	0.011763	0.020043	0.0255992	0.0194714	0.0202494	0.0222778	0.0264585	0.0178802	0.0176114	0.0171951	0.0192871	0.0132677	0.0178499	0.0177446	0.0214835	0.0255232	0.0209129	0.0278724	0.019325	0.0273683	0.016401	0.0221298	0.0208471	0.012972	0.017683	0.034537	0.0275542	0.0228527	0.0228051	0.0248305	0.0234827	0.0161542	0.0291463	0.020764	0.0281142	0.0178391	0.0190519	0.0197755	0.0126794
-4.64107	0.540331	22.0696	2.14056e-05	0.000650144	Gm27395		7	143251367	143251826	0	0	0	0	0	0	0	0	0	0	0	0	0	0	0	0	0	0	0	1	0	0	0	0	0	#NUM!	0	0	0.115187	0	0	0	0	0	0	0	0	#NUM!	0	0
-5.73099	1.32632	44.5124	9.50249e-09	3.71738e-07	Gm27389		7	143273053	143273247	0	0	0	#NUM!	0	0	0	0	0	0	0	0	0	0.135864	0	0	0	0	0	0.419064	0.0737638	0	0	0	0	0	0	0	0	0	0	0	0	0	0	0.10336	0	0	0	0
-4.32222	1.91874	70.5476	1.64422e-11	7.74961e-10	Gm27539		7	143293932	143294155	0	0	0	0.255389	0.0603576	0	0	0	0	0	0	0	0	0	0	0	0	0	0	0	0.099849	0	0.0445941	0.0741134	0	0	0	0	0	0	0	0	0	0	0	0	0	0	0	0
7.46542	8.83187	298.437	4.17602e-29	2.3338e-26	Cdkn1c	12577	7	143458339	143461050	0.991736	0.993742	0.995401	0.99646	0.995702	0.994562	0.9951	0.990894	0.99708	0.974516	0.998028	0.984469	0.973537	0.994596	0.993873	0.997238	0.991287	0.992888	0.997491	0.999012	0.997518	0.989861	0.996491	0.996306	0.883231	0.98508	0.991278	0.959412	0.981674	0.983011	0.993815	0.996134	0.989062	0.98612	0.985115	0.989742	0.995277	0.995877	0.994155	0.997705
3.1111	5.40685	51.2656	3.08575e-10	1.32945e-08	Slc22a18	18400	7	143473736	143499334	0.87459	0.849501	0.904401	0.745591	0.966647	0.990993	0.969567	0.989363	0.949203	0.816198	0.876191	0.823586	0.833065	0.89125	0.777154	0.857027	0.952148	1	0.982981	0.961901	0.868594	0.97984	0.983202	0.941174	0.687133	0.719064	0.627115	0.697613	0.736881	0.858237	0.775329	0.770468	0.813504	0.847523	0.867082	0.868738	0.813227	0.815357	0.85939	0.84613
4.36913	8.25263	214.855	1.16714e-24	3.74251e-22	Phlda2	22113	7	143501545	143503150	0.954752	0.921481	0.938615	0.915415	0.966307	0.981319	0.979437	0.962813	0.947351	0.880051	0.954496	0.888459	0.831324	0.932179	0.930384	0.937763	0.978074	0.981907	0.979836	0.974059	0.975689	0.95917	0.975407	0.968138	0.694557	0.706079	0.740761	0.73635	0.812072	0.825878	0.839135	0.837064	0.786523	0.81068	0.821126	0.845519	0.928827	0.906707	0.950749	0.955678
0.351556	6.0743	16.7388	9.95017e-05	0.00282066	Cars	27267	7	143557230	143600090	0.585951	0.552698	0.569792	0.505742	0.560021	0.551804	0.54653	0.610539	0.55331	0.563948	0.554969	0.490105	0.462205	0.507958	0.543832	0.528764	0.562546	0.569788	0.566707	0.629554	0.541619	0.566078	0.553344	0.568925	0.50158	0.481737	0.512665	0.521486	0.532583	0.557474	0.571976	0.489811	0.537774	0.543816	0.54094	0.551539	0.574248	0.547266	0.556022	0.560959
1.91246	1.5961	21.5181	1.30568e-05	0.000400928	Tnfrsf22	79202	7	143634806	143649661	0.612378	0.814479	0.850215	0.79048	0.804344	0.849743	0.861427	0.785309	0.887233	0.761626	0.920512	0.773075	0.804877	0.825076	0.656646	0.817378	0.935363	0.640538	0.891904	1	0.838096	0.674077	0.911258	0.925855	0.701091	0.803496	0.724991	1	0.62072	0.760373	0.459748	0.682593	0.406061	0.509218	0.892571	1	0.895376	0.64001	1	0.89546
2.24108	3.53171	42.1126	6.07681e-09	2.42576e-07	Osbpl5	79196	7	143688762	143756985	0.825769	0.657265	0.863982	0.775705	0.869799	1	0.846759	0.965774	0.904825	0.675666	0.890186	0.669375	0.807263	0.810655	0.849437	0.842359	0.823053	0.866512	1	0.86834	0.60094	0.705429	0.863617	0.829238	0.704544	0.699813	0.647664	0.614994	0.757539	0.808827	0.877183	0.84317	0.715159	0.780575	0.593574	0.628879	0.784049	0.791352	0.89753	0.763925
0.70681	4.99796	21.8423	1.14235e-05	0.000353551	Dhcr7	13360	7	143823145	143848410	0.677307	0.573924	0.652121	0.564632	0.587296	0.68514	0.600198	0.57817	0.630456	0.61071	0.549346	0.570632	0.589529	0.661306	0.615311	0.532476	0.573332	0.529369	0.665037	0.559746	0.558956	0.505278	0.545586	0.615097	0.527996	0.546349	0.528058	0.495637	0.520635	0.569859	0.575668	0.5854	0.642677	0.605256	0.579998	0.584304	0.598489	0.62448	0.632577	0.563294
2.62335	0.981676	14.8927	0.000236428	0.00636111	Shank2	210274	7	144001928	144424494	1	1	1	1	1	0.435402	0.878824	1	0.424497	0.797259	#NUM!	0.708742	1	0.738907	0.919838	1	1	1	1	1	#NUM!	0.340827	0.860358	1	0.808499	0.904178	0.849604	0.809129	0.946538	1	1	1	1	1	1	1	0.487414	0.791352	1	0.487639
-1.68549	8.76714	195.244	1.96345e-23	4.92372e-21	Gab1	14388	8	80764438	80880519	0.257898	0.254156	0.22276	0.273868	0.249815	0.19354	0.213671	0.222631	0.517448	0.386452	0.474091	0.459324	0.209124	0.2277	0.204259	0.216748	0.206997	0.188776	0.211164	0.175579	0.215569	0.191406	0.17535	0.207251	0.466896	0.482707	0.498799	0.483487	0.481529	0.48232	0.497122	0.51495	0.492321	0.415771	0.519435	0.494571	0.344797	0.243123	0.258938	0.23585
-1.95249	6.67969	82.4085	4.88916e-14	2.86324e-12	Sall1	58198	8	89027235	89044162	0.256765	0.231157	0.286352	0.266048	0.181913	0.144512	0.144147	0.14112	0.37875	0.12063	0.238832	0.196769	0.26232	0.286324	0.197873	0.24755	0.0979953	0.134162	0.173051	0.163978	0.221558	0.203294	0.143272	0.161663	0.489221	0.42268	0.592218	0.568974	0.354655	0.33388	0.424156	0.368432	0.338335	0.392697	0.427245	0.316347	0.263564	0.315202	0.253205	0.245819
3.35491	0.0482157	10.9749	0.00166381	0.0400297	Gm5912		8	95577471	95578908	1	#NUM!	1	1	1	#NUM!	1	1	1	1	1	1	1	1	1	#NUM!	#NUM!	1	#NUM!	1	#NUM!	#NUM!	0.506626	1	#NUM!	1	1	1	#NUM!	1	1	#NUM!	1	#NUM!	1	1	#NUM!	0	1	1
6.52386	5.50255	197.984	1.30791e-23	3.45711e-21	Gm9797		10	11609223	11609835	0.987597	0.992596	1	1	0.956118	0.984115	1	0.995996	0.996655	0.946512	1	1	0.992104	0.957569	1	1	1	1	0.996327	1	0.934689	0.977049	0.992704	0.986505	0.995367	0.985881	1	1	0.931219	0.916791	0.991126	0.97259	0.978238	0.984016	0.994163	0.994644	0.954047	0.866228	1	1
-5.98729	6.91974	243.042	2.75897e-26	1.1482e-23	Plagl1	22634	10	13060504	13131694	0.0115671	0.0153812	0.0134825	0.0188276	0.0142491	0.0150264	0.0143032	0.0189863	0.00906571	0.00794412	0.00991157	0.0107065	0.00930648	0.012992	0.00594089	0.0111901	0.0130456	0.00506544	0.0397594	0.00673405	0.00907875	0.00850877	0.0134008	0.0146956	0.0179773	0.0120036	0.0120798	0.00289908	0.0183022	0.0192379	0.0268188	0.0189351	0.0113913	0.00662117	0.0200861	0.0129086	0.00838682	0.00727268	0.0113475	0.0255438
-4.09989	1.33643	18.2309	5.57262e-05	0.00162445	Trpm2	28240	10	77907722	77970563	0	0	0	0	0	0.170569	0	0	0.495836	0.710795	0.658712	1	#NUM!	#NUM!	1	#NUM!	0	0	0	0	0.158416	0	0.0244335	0.147799	0.484058	0	0.484939	#NUM!	0.675632	0.679017	0.515442	0.349649	0	1	0.341793	0	0.487414	0.240158	0	#NUM!
6.20272	8.21781	497.882	1.18556e-36	1.36409e-33	Grb10	14783	11	11930508	12038683	0.983552	0.97132	0.986805	0.984656	0.989113	0.994278	0.98987	0.991774	0.990562	0.976508	0.981341	0.966395	0.966575	0.990546	0.969283	0.985827	0.988946	0.986261	0.995943	0.984457	0.991866	0.992921	0.991208	0.992344	0.991754	0.994892	0.995939	0.990382	0.99159	0.992712	0.990948	0.9891	0.99095	0.990575	0.99449	0.997569	0.974067	0.981434	0.97707	0.980926
4.36702	0.144103	19.542	6.50903e-05	0.0018806	Gm24036		11	12054148	12054303	1	1	1	1	1	1	1	#NUM!	1	1	#NUM!	1	1	1	#NUM!	1	#NUM!	1	1	1	1	1	1	1	1	1	1	#NUM!	1	1	1	1	1	#NUM!	1	#NUM!	#NUM!	1	1	#NUM!
-2.54042	3.45723	96.8536	1.48185e-15	1.03149e-13	Zrsr1	22183	11	22972005	22976496	0.196541	0.363121	0.129222	0.143602	0.136529	0.128077	0.0339292	0.0485076	0.256808	0.185814	0.265726	0.474743	0.192232	0.212306	0.205365	0.171755	0.176637	0.0847251	0.0779494	0.186333	0.0924211	0.0883793	0.154954	0.178847	0.0827469	0.210201	0.26315	0.142545	0.0943225	0.0877212	0.0738855	0.219735	0.138107	0.0154774	0.178559	0.076075	0.149726	0.191623	0.141395	0.13978
-2.06141	1.31972	17.3739	7.77339e-05	0.00222292	Gm12569	622699	11	51220473	51235053	0	0.17291	0.296004	0.273932	0.291334	0	0.147251	0.207152	0.38068	0.179297	0.161783	0.350966	0	0	0.323461	0.242251	0.279341	0	0.204989	0	0	0	0	0	0.21964	0.485492	0.484939	0.715269	0.480719	0.552373	0.515442	0.682593	0.535683	0.784086	0.700308	0.40886	0.06816	0.119296	0	0.487639
7.75295	6.47146	114.815	2.80439e-17	2.40587e-15	Gm11512		11	90538484	90539146	0.961481	0.934639	1	1	0.998331	0.99849	0.998515	0.998373	0.972155	0.877701	0.988741	0.903327	0.961637	0.985877	0.945091	1	0.996801	0.998286	0.998461	0.995195	0.991847	1	1	1	0.967437	0.991246	0.975046	1	0.999089	1	1	0.99558	1	1	0.996064	0.994421	0.966669	0.981834	0.971501	0.98779
-2.97686	2.44792	30.1681	4.3096e-07	1.51339e-05	2410003L11Rik	69729	11	97598511	97622893	0.400877	0.135541	0.0632971	0.190809	0.0683905	0	0.035682	0	0.648386	0.620997	0.491105	0.593501	0.322474	0.0631285	0.106766	0.619839	0.0382356	0	0	0	0	0.0503604	0	0	0.652344	0.805896	0.690987	0.687312	0.300129	0.392608	0.23679	0.309405	0.338955	0.265188	0.302033	0.276529	0.341529	0.321617	0.159227	0.375431
-0.68053	7.65706	30.298	4.10385e-07	1.44894e-05	Epop	103551	11	97627389	97629702	0.431902	0.39695	0.408689	0.389115	0.375511	0.350745	0.376547	0.329888	0.535413	0.455993	0.499077	0.424461	0.463583	0.418204	0.410136	0.457493	0.387248	0.333817	0.341424	0.258451	0.417374	0.37783	0.259375	0.334165	0.486318	0.485115	0.477574	0.490516	0.483433	0.523985	0.496124	0.45483	0.477101	0.483031	0.476602	0.49119	0.430288	0.437829	0.372805	0.421702
-2.22083	6.69351	128.429	1.75718e-18	1.90787e-16	Smoc1	64075	12	81026808	81186414	0.137649	0.176757	0.109928	0.127813	0.246663	0.234083	0.192686	0.169233	0.204108	0.198417	0.518376	0.284618	0.14145	0.086643	0.138729	0.0648369	0.203223	0.126223	0.179868	0.191664	0.138662	0.200443	0.138603	0.221552	0.500034	0.496749	0.508206	0.483182	0.482451	0.504268	0.497778	0.513075	0.490294	0.46812	0.469681	0.468838	0.243879	0.145829	0.089619	0.0816092
-5.28837	4.72605	153.748	1.59685e-20	2.53938e-18	Dlk1	13386	12	109452823	109463336	0.0123187	0.0410082	0.0395072	0.0223544	0.0130878	0.0570343	0	0.00705935	0.0209325	0.00862499	0.0224611	0.00666803	0	0.0230404	0	0.0674987	0.0412904	0.126991	0	0.049001	0.0106693	0	0	0.0153502	0.0293755	0.0806942	0.037749	0.0424492	0.0261546	0.0237001	0.0113489	0.0167233	0.0330538	0	0.0148284	0	0.0283418	0.0284899	0.0267891	0.0295558
4.69644	7.4546	103.257	3.44516e-16	2.59182e-14	Meg3	17263	12	109541001	109571726	0.998394	0.992444	0.996945	0.987031	0.912865	0.966727	0.927842	0.951099	0.935589	0.993653	0.998908	0.996289	0.946175	0.995547	0.983115	0.975146	0.920906	0.914468	0.923075	0.961901	0.935652	0.933157	0.955532	0.967451	0.978921	0.996147	0.991334	0.982389	0.99201	0.99335	0.989715	0.992348	0.952818	0.98343	0.996359	1	0.989706	0.996401	0.994577	1
3.45792	0.179182	13.4232	0.00055104	0.0141634	Gm27596		12	109541168	109541250	1	1	1	1	1	1	1	0.676397	#NUM!	#NUM!	1	1	#NUM!	1	#NUM!	1	1	#NUM!	0	1	1	1	1	1	#NUM!	#NUM!	#NUM!	1	1	1	1	1	#NUM!	1	1	#NUM!	#NUM!	1	1	#NUM!
4.29866	4.75915	90.1359	1.02246e-14	6.43065e-13	Gm26906		12	109568628	109571723	0.986655	0.988327	1	0.995047	0.911328	0.960528	0.870708	0.923424	1	1	1	1	1	1	0.989334	0.974902	0.900726	0.924351	0.899877	1	0.967108	0.892861	0.95465	0.974396	0.968712	1	1	1	0.991611	1	0.989249	0.993158	1	0.974613	1	1	0.979128	1	1	1
3.64403	0.0794338	13.8799	0.000528558	0.0136393	Mir673	751547	12	109571990	109572080	1	#NUM!	1	1	1	1	1	1	1	1	1	1	#NUM!	1	#NUM!	1	#NUM!	1	1	#NUM!	#NUM!	1	1	#NUM!	1	#NUM!	#NUM!	1	1	1	1	1	1	1	#NUM!	#NUM!	1	1	1	1
5.20577	0.638815	28.112	2.34284e-06	7.67603e-05	Mir493	100124466	12	109580233	109580315	1	#NUM!	1	1	1	1	1	1	#NUM!	1	1	1	#NUM!	1	1	1	1	0.802877	1	#NUM!	0.823285	1	0.804207	1	1	1	#NUM!	1	1	1	1	1	1	1	1	1	1	1	1	1
5.00675	0.17919	27.4203	2.52427e-06	8.24285e-05	Mir540	723880	12	109586080	109586146	1	1	1	1	1	1	1	1	#NUM!	1	#NUM!	1	#NUM!	1	#NUM!	0.48956	#NUM!	1	1	#NUM!	#NUM!	1	1	#NUM!	1	#NUM!	1	0.653268	0.80642	1	1	1	1	#NUM!	#NUM!	1	#NUM!	#NUM!	1	1
5.19544	0.669547	25.2122	7.10689e-06	0.000224211	Mir3070a	100526472	12	109587943	109588031	1	1	1	1	1	1	#NUM!	1	1	1	1	1	1	1	1	1	1	#NUM!	1	#NUM!	1	1	1	0.879288	#NUM!	1	#NUM!	1	1	1	1	1	1	#NUM!	1	1	1	1	1	1
4.3266	0.930331	32.0279	2.86862e-07	1.02391e-05	Mir3070b	100526519	12	109588592	109588680	1	1	1	1	1	0.878013	1	0.86246	#NUM!	1	1	0.910875	1	1	1	#NUM!	0.805243	#NUM!	1	1	0.67433	1	1	1	1	1	1	1	1	1	0.955106	1	1	1	1	1	1	0.791352	1	#NUM!
3.5193	4.83582	96.5294	1.59768e-15	1.10818e-13	Rtl1	353326	12	109589193	109600330	0.940149	0.948307	0.913595	0.950698	0.82136	0.966814	0.933275	0.915093	0.9769	0.957112	0.954524	0.932889	0.950874	0.991455	0.923502	0.989881	0.877672	0.745382	0.859767	0.970568	0.918426	0.958259	0.952435	0.962623	1	0.97419	0.980354	0.965152	0.82653	0.942858	0.882173	0.890822	0.930224	0.987143	0.951279	0.958026	0.913839	0.931691	0.926477	0.90492
3.51088	0.00160571	11.3982	0.00142449	0.0344838	Mir433	723937	12	109591715	109591838	#NUM!	1	1	#NUM!	1	#NUM!	1	1	#NUM!	1	#NUM!	1	1	1	#NUM!	1	#NUM!	#NUM!	#NUM!	#NUM!	#NUM!	1	1	0.509947	1	#NUM!	1	1	1	1	1	1	#NUM!	1	#NUM!	#NUM!	1	#NUM!	1	#NUM!
4.82657	8.40494	87.1605	1.49693e-14	9.26583e-13	Rian		12	109603808	109661716	0.997818	0.996245	0.99783	0.991337	0.913872	0.966963	0.927568	0.950162	0.960316	0.997348	0.993313	0.991424	0.974242	0.994523	0.983747	0.981211	0.886509	0.887843	0.901428	0.970206	0.954927	0.945404	0.965045	0.972178	0.997775	0.990947	1	0.971459	0.990486	0.990042	0.991899	0.987236	0.969356	0.984287	0.99895	0.97913	0.987277	0.997153	0.992692	0.999363
4.46007	0.875765	28.7211	1.61258e-06	5.35519e-05	Gm27350		12	109603882	109603979	1	1	1	1	0.902437	1	1	1	1	1	1	1	#NUM!	1	1	1	1	#NUM!	1	1	1	1	0.804207	1	1	1	#NUM!	1	1	1	1	1	#NUM!	1	1	1	#NUM!	1	1	1
3.81974	0.590875	17.4466	0.000117445	0.00328176	Mir341	723846	12	109611500	109611595	1	1	1	1	#NUM!	1	1	0.676397	1	1	1	1	1	1	1	1	1	#NUM!	1	#NUM!	1	1	1	1	#NUM!	#NUM!	#NUM!	1	1	1	1	1	#NUM!	#NUM!	1	#NUM!	1	1	1	1
5.16899	1.03974	45.0702	5.12761e-09	2.05105e-07	Mir1188	100316669	12	109611822	109611941	1	1	1	1	1	1	1	0.86246	1	1	1	1	1	1	1	1	1	1	1	1	1	1	0.506626	0.861947	1	1	1	1	0.735255	1	1	1	1	1	1	1	1	1	1	0.559277
5.08875	0.982149	37.1315	6.29168e-08	2.35307e-06	Gm24564		12	109631074	109631148	1	1	1	1	1	0.939111	1	1	1	1	1	1	#NUM!	1	1	1	1	1	1	1	1	1	1	0.892759	#NUM!	1	1	1	1	1	1	0.957592	1	1	1	1	1	1	1	1
3.85384	1.19527	37.5287	3.6468e-08	1.38777e-06	Gm23600		12	109643748	109643818	1	1	1	1	0.911328	0.918769	0.823393	1	1	1	1	1	1	1	1	1	0.67398	#NUM!	1	1	1	1	0.860358	1	1	1	1	1	1	1	0.937076	1	1	0.861599	1	#NUM!	1	1	1	1
3.53321	0.141796	11.8588	0.00128539	0.0313494	DQ267101	100861571	12	109651424	109651496	#NUM!	1	#NUM!	1	#NUM!	1	1	1	#NUM!	1	#NUM!	1	#NUM!	1	#NUM!	1	1	1	1	#NUM!	#NUM!	1	1	1	#NUM!	#NUM!	#NUM!	#NUM!	1	1	1	1	#NUM!	1	1	1	1	1	1	1
4.45944	0.0879281	19.9732	4.13385e-05	0.00122512	Gm25357		12	109657125	109657196	1	1	#NUM!	1	1	1	1	1	#NUM!	1	#NUM!	1	1	#NUM!	1	#NUM!	1	1	0	#NUM!	1	#NUM!	1	1	#NUM!	#NUM!	#NUM!	1	1	1	#NUM!	1	#NUM!	#NUM!	#NUM!	#NUM!	1	1	#NUM!	#NUM!
5.00252	5.49298	110.571	6.92009e-17	5.57025e-15	Gm37899		12	109668869	109677585	0.994564	1	1	0.997363	0.916315	0.949466	0.938906	0.945083	0.946059	0.992452	1	0.997978	0.975311	1	1	1	0.929656	0.910574	0.918997	0.925184	0.978172	0.887395	0.961519	0.942938	1	1	1	0.98923	0.994512	0.990588	0.953438	0.991641	1	0.971623	1	0.979904	0.988818	0.996785	1	1
3.80801	-0.0716608	14.4359	0.000392352	0.0103708	AF357428		12	109679945	109680013	#NUM!	1	1	#NUM!	#NUM!	1	1	1	1	1	1	1	#NUM!	#NUM!	#NUM!	1	#NUM!	#NUM!	1	#NUM!	#NUM!	#NUM!	1	#NUM!	#NUM!	#NUM!	1	1	1	1	#NUM!	1	#NUM!	#NUM!	1	#NUM!	#NUM!	#NUM!	#NUM!	1
3.44857	0.00555258	10.6917	0.00203482	0.0483609	AF357341		12	109681519	109681593	#NUM!	#NUM!	1	1	1	1	1	1	#NUM!	1	1	1	#NUM!	1	1	#NUM!	1	1	#NUM!	#NUM!	1	1	#NUM!	#NUM!	1	#NUM!	1	1	#NUM!	1	0.347202	1	#NUM!	1	#NUM!	#NUM!	1	#NUM!	1	1
5.15194	0.597361	26.4412	3.55459e-06	0.000114922	Gm25856		12	109682994	109683068	#NUM!	1	1	1	1	1	1	1	1	1	1	1	1	1	1	#NUM!	1	0.50452	#NUM!	#NUM!	1	1	0.719665	0.581145	#NUM!	#NUM!	1	0.653268	1	1	1	1	1	1	#NUM!	1	1	1	1	1
4.94088	0.554131	19.9617	4.62496e-05	0.00136036	Gm23787		12	109684962	109685034	1	1	1	1	1	1	1	1	#NUM!	1	1	1	1	1	1	1	0.733787	1	1	#NUM!	1	1	1	1	1	#NUM!	#NUM!	1	1	1	1	1	1	1	1	1	1	1	1	1
5.33939	0.619497	31.4036	1.11091e-06	3.75293e-05	Gm25854		12	109686798	109686869	#NUM!	1	1	1	1	1	1	1	1	1	1	1	1	1	1	1	1	#NUM!	1	1	0.608296	0.878622	1	1	1	#NUM!	#NUM!	1	1	1	1	1	#NUM!	1	1	#NUM!	1	1	1	1
5.43978	0.696773	35.1793	1.935e-07	7.03506e-06	Gm22205		12	109688055	109688125	1	1	1	1	1	1	1	1	1	1	1	1	1	1	1	1	1	1	1	#NUM!	1	0.892158	1	1	#NUM!	#NUM!	#NUM!	1	1	1	1	1	1	1	1	1	0.850866	1	1	1
4.27038	0.234771	21.6526	2.48785e-05	0.000749804	Gm25224		12	109689477	109689544	1	1	1	1	1	1	1	1	#NUM!	1	1	1	#NUM!	1	1	1	0	1	1	#NUM!	1	1	1	1	#NUM!	1	1	1	#NUM!	1	1	1	1	1	1	#NUM!	1	1	1	1
4.10057	3.87296	76.8122	2.06253e-13	1.12376e-11	B830012L14Rik		12	109695586	109702587	1	1	0.969848	0.979635	0.873741	0.87969	0.953962	0.926957	0.9758	1	1	0.976576	1	0.985082	0.970579	1	0.920489	0.812296	0.876402	1	1	0.878622	0.979701	0.990931	1	1	1	0.966188	0.982369	0.991555	0.949836	0.994591	1	0.969847	1	1	0.975286	1	0.990316	1
4.20469	0.174186	17.5151	0.000117029	0.00327481	Mir299a	723927	12	109710638	109710700	#NUM!	1	1	1	1	#NUM!	1	#NUM!	1	1	1	1	#NUM!	1	1	#NUM!	1	#NUM!	#NUM!	#NUM!	0.756448	1	1	1	#NUM!	#NUM!	1	1	#NUM!	1	1	1	#NUM!	#NUM!	#NUM!	1	1	1	1	1
3.11212	0.107148	11.5692	0.00132189	0.0321982	Mir1197	100316751	12	109712317	109712436	1	#NUM!	1	1	0.71984	1	1	1	#NUM!	1	1	1	#NUM!	#NUM!	1	#NUM!	1	#NUM!	1	#NUM!	1	1	#NUM!	#NUM!	#NUM!	1	#NUM!	1	1	#NUM!	1	1	#NUM!	1	#NUM!	#NUM!	1	1	1	1
4.07319	0.0894235	12.9097	0.000713322	0.0180967	Mir543	723881	12	109717258	109717333	1	1	#NUM!	1	1	1	#NUM!	1	#NUM!	1	1	1	#NUM!	1	1	#NUM!	1	#NUM!	#NUM!	#NUM!	#NUM!	1	1	1	#NUM!	0	0	0	1	0.514025	#NUM!	1	1	#NUM!	1	#NUM!	1	1	#NUM!	#NUM!
3.58924	0.523837	17.8764	8.1229e-05	0.00231609	Mir667	751552	12	109720006	109720097	#NUM!	1	1	1	1	#NUM!	0.756584	1	1	1	1	1	1	1	1	1	1	0	1	#NUM!	1	1	1	1	0	0.485492	#NUM!	#NUM!	1	1	1	1	1	1	1	1	1	1	1	1
3.46041	0.222736	15.5649	0.000202361	0.00549746	Mir654	100124453	12	109723218	109723301	1	1	1	1	1	0.755183	1	1	1	1	1	1	1	1	1	1	1	#NUM!	1	#NUM!	1	1	#NUM!	1	#NUM!	1	0.738532	1	0	1	#NUM!	1	1	#NUM!	1	#NUM!	1	1	1	1
3.72309	0.0320688	10.8937	0.00167827	0.040328	Gm25252		12	109723756	109723875	#NUM!	1	#NUM!	1	1	1	#NUM!	1	#NUM!	1	1	#NUM!	#NUM!	1	#NUM!	1	0.508273	#NUM!	1	#NUM!	#NUM!	1	1	1	0.484058	0.653645	#NUM!	#NUM!	1	1	1	#NUM!	1	1	1	#NUM!	1	1	1	1
3.26296	0.315862	11.2368	0.00138914	0.0336698	Gm44322		12	109728108	109728222	1	1	1	#NUM!	1	1	1	0.511027	1	0.746791	1	1	#NUM!	1	1	#NUM!	1	#NUM!	#NUM!	#NUM!	1	1	#NUM!	1	0	0.485492	1	1	1	1	1	1	1	1	1	1	#NUM!	1	1	#NUM!
4.39436	0.0944704	23.1148	1.28895e-05	0.000396413	Mir544	100124450	12	109729325	109729402	1	1	#NUM!	1	1	1	1	1	1	1	1	1	#NUM!	1	1	#NUM!	#NUM!	#NUM!	#NUM!	#NUM!	1	0	#NUM!	1	#NUM!	0	1	1	1	1	1	1	#NUM!	#NUM!	1	1	1	1	#NUM!	1
4.71442	5.60392	109.946	7.91806e-17	6.32152e-15	Mirg	100040724	12	109729764	109749460	0.990191	1	0.996656	0.991634	0.921768	0.967552	0.926407	0.909808	0.962823	0.996261	0.98991	0.988217	0.944856	1	0.988761	0.98244	0.877174	0.861329	0.924345	1	0.953336	0.914535	0.966389	0.98082	0.637567	0.6761	0.784634	0.802798	0.946238	0.96346	0.93057	0.970363	0.879244	0.924687	0.920179	0.92997	0.983268	1	1	1
4.20183	1.06164	32.7619	1.94728e-07	7.06656e-06	Mir453	100124484	12	109735619	109735700	1	1	1	1	1	0.804417	0.89234	1	0.746864	1	1	1	1	1	1	1	1	1	0.673497	#NUM!	1	0.878622	1	1	#NUM!	1	0.484939	0.849674	1	1	1	1	1	1	1	1	1	1	1	1
6.13269	8.75316	66.5649	4.17597e-12	2.03982e-10	Gm4076		13	85126550	85127514	0.823627	0.873085	0.880318	0.861321	1	0.999471	0.999723	1	0.891331	0.803509	0.847403	0.791128	0.848783	0.825946	0.852284	0.898899	0.999708	0.999655	1	0.999044	1	1	1	1	0.90368	0.894653	0.818635	0.871197	1	0.999189	0.999703	1	0.99983	1	0.998569	1	0.886568	0.909395	0.870572	0.883048
5.77682	6.63878	129.022	1.56418e-18	1.72855e-16	Gm6169		13	97098208	97099237	0.969616	0.95623	0.99786	0.993967	0.950644	0.978652	0.998264	0.99611	0.961727	0.846447	1	1	0.98729	0.929003	1	1	0.987952	0.979568	0.992554	0.996458	0.973201	0.973699	0.992649	0.992029	0.955894	0.974377	1	1	0.934007	0.902746	0.99406	0.993128	0.969586	0.962186	0.998089	0.983745	0.894519	0.840742	1	1
-3.84358	5.7348	12.576	0.000659303	0.0167916	Lncenc1		13	97434970	97497007	1	1	1	1	0	0	0	0	0.965552	1	0.977491	1	1	1	1	1	0.00275615	0	0	0.0031803	0.00211702	0.00467849	0	0	1	1	0.99814	0.99807	0.00300963	0	0	0	0	0.00207083	0	0.00327239	1	0.929946	1	1
6.92046	1.8379	94.2931	2.31365e-14	1.40543e-12	Gm5455		13	110304777	110305491	1	1	1	1	1	1	1	1	1	0.49574	1	1	1	0.825076	1	1	1	1	1	1	1	1	1	1	1	0.883025	1	1	1	0.936741	1	1	1	1	1	1	0.826222	0.825812	1	1
4.67198	0.744498	13.6013	0.000626573	0.0160206	Gzma	14938	13	113093825	113100981	1	1	1	1	#NUM!	1	1	1	1	1	1	1	1	#NUM!	1	1	1	1	1	1	1	1	1	#NUM!	1	1	1	1	1	#NUM!	1	#NUM!	1	1	1	1	1	1	1	1
4.90425	1.44456	20.5586	2.20772e-05	0.000669503	Gzme	14942	14	56117626	56120625	1	1	1	1	1	0.92503	1	#NUM!	1	1	1	1	1	#NUM!	1	1	1	0.946863	#NUM!	1	1	1	1	#NUM!	1	1	1	1	1	#NUM!	0.957152	1	0.951183	0.838392	1	1	1	1	1	1
2.745	1.81702	13.423	0.000456612	0.0119403	Gzmd	14941	14	56129556	56132608	0.949895	0.714994	0.868806	0.754023	0.924998	1	1	1	0.929957	0.85758	1	0.773075	0.883928	#NUM!	0.58921	0.742088	1	0.969293	#NUM!	0.953726	1	1	1	1	1	1	0.888925	0.888979	0.974705	#NUM!	1	1	1	0.75685	0.963384	1	1	1	0.486366	0.91281
4.37451	1.91506	18.636	4.53082e-05	0.00133669	Gzmg	14944	14	56156582	56159579	1	1	1	1	1	1	0.873531	1	0.962364	1	1	1	1	#NUM!	1	1	1	0.896428	1	1	1	1	0.945819	0.67545	1	1	1	1	0.912393	1	0.867275	1	1	1	0.877683	0.959778	1	1	1	1
5.28037	1.3548	12.0107	0.00101932	0.0252699	Gzmf	14943	14	56205263	56211417	1	1	1	1	1	1	1	#NUM!	1	1	1	1	1	#NUM!	#NUM!	1	1	1	#NUM!	1	1	1	1	1	1	#NUM!	1	1	0.973298	1	1	#NUM!	0.971299	1	0.858816	1	1	#NUM!	1	#NUM!
5.78631	1.41964	13.9621	0.000541807	0.0139444	Gzmc	14940	14	56231441	56234656	1	1	1	1	1	1	1	1	1	1	1	1	1	1	1	1	1	1	1	1	1	1	1	#NUM!	#NUM!	#NUM!	1	1	1	#NUM!	1	1	1	1	1	1	1	1	1	1
6.27427	1.65607	15.5899	0.000265971	0.00711682	Gzmb	14939	14	56258838	56262260	1	1	1	1	1	1	1	1	1	1	1	1	1	#NUM!	1	#NUM!	1	1	1	1	#NUM!	1	1	1	1	1	1	1	1	#NUM!	1	0.349649	1	1	1	1	1	1	1	#NUM!
4.68731	0.41496	27.1778	4.21995e-06	0.00013576	Acot10	64833	15	20665214	20666750	1	1	1	1	#NUM!	1	1	1	1	1	1	1	1	1	1	1	1	1	1	#NUM!	1	0.508383	1	1	1	1	1	1	1	#NUM!	1	1	1	1	1	1	1	1	1	1
-3.16313	3.52825	90.9038	6.03322e-15	3.90761e-13	Peg13	353342	15	72805600	72810324	0.191576	0.131745	0.180827	0.158703	0.0649337	0.134792	0.0475563	0.0440752	0.164366	0.0298063	0.107645	0.142731	0.100711	0.105481	0.142587	0.230602	0.141221	0.211331	0.0278515	0.118488	0.0330042	0.0352127	0.0706871	0.048794	0.224011	0.165731	0.273576	0.238972	0.0315197	0.10358	0.0471435	0.0890468	0.113624	0.0961816	0.132493	0.218334	0.0812667	0.0339266	0.186697	0.109374
0.889746	7.37274	17.4059	7.44044e-05	0.00213394	Cbx7	52609	15	79915807	79971119	0.532937	0.633809	0.762391	0.426756	0.786278	0.721119	0.654827	0.762394	0.47215	0.740149	0.729103	0.572709	0.440363	0.507081	0.595927	0.620025	0.748372	0.757241	0.596828	0.708327	0.666394	0.599393	0.587567	0.751137	0.406488	0.435624	0.425459	0.553716	0.644354	0.68595	0.54555	0.580512	0.597493	0.58791	0.586512	0.643649	0.523985	0.484492	0.552974	0.753542
-5.83602	9.94115	224.58	3.084e-25	1.0772e-22	Slc38a4	69354	15	96994820	97055956	0.00480597	0.00731171	0.00574852	0.0117375	0.022782	0.0248694	0.028425	0.0279116	0.0876419	0.0539165	0.267928	0.0864377	0.00642465	0.00365138	0.00549692	0.00544395	0.0535403	0.00768543	0.0154907	0.0215134	0.0924631	0.0572933	0.0092887	0.0203146	0.247457	0.0905441	0.336057	0.412634	0.228958	0.389991	0.405917	0.452142	0.362575	0.436149	0.469817	0.450752	0.006308	0.00608284	0.0150685	0.00996463
-2.08093	4.01339	19.6944	2.79541e-05	0.000838622	Galnt6	207839	15	100691813	100729376	0.144764	0.17971	0.0996725	0.0927077	0.369995	0.313653	0.43368	0.544295	0.205063	0.149716	0.12294	0.106107	0.112627	0.175998	0.178318	0.209776	0.371329	0.11815	0.607392	0.607192	0.333755	0.408075	0.283127	0.245389	0.157332	0.132091	0.249898	0.195103	0.669428	0.556745	0.347202	0.167785	0.458302	0.490693	0.372435	0.393358	0.170537	0.172597	0.17595	0.131165
1.20309	5.72294	17.4789	7.20851e-05	0.00207046	Arid1b	239985	17	4994332	5347656	0.59489	0.601855	0.657622	0.682839	0.683245	0.903085	0.807296	0.784747	0.639648	0.59846	0.683323	0.555336	0.646513	0.668304	0.693466	0.664669	0.766455	0.724932	0.8345	0.797992	0.757775	0.748155	0.810862	0.826068	0.625033	0.680538	0.625589	0.644331	0.763447	0.673266	0.744519	0.681081	0.762024	0.65729	0.748757	0.840807	0.54309	0.620693	0.684125	0.570802
1.37341	2.17074	11.5985	0.00102288	0.025326	Zdhhc14	224454	17	5492557	5753811	0.654672	0.550155	0.887434	0.944376	0.589972	0.578232	0.580083	1	0.6325	0.595903	0.570249	0.482615	0.56689	0.669035	0.769945	0.68334	0.720992	0.595273	0.375639	0.860784	0.383165	0.57344	0.732499	0.609511	0.794665	0.578507	0.672584	0.682864	0.833306	0.596905	0.691896	0.747282	0.534051	0.75685	0.561062	0.389665	0.726963	0.698595	0.842911	0.681674
3.56563	0.515031	14.4082	0.000293258	0.00781491	Fndc1	68655	17	7738569	7827302	#NUM!	1	1	1	1	1	1	0.676397	0.746864	1	#NUM!	0.421971	0.740647	#NUM!	0.323461	1	1	1	#NUM!	1	1	1	1	1	1	0.653645	0.738532	0.556747	1	1	1	0.682593	0.506298	#NUM!	1	1	0.7039	0.739892	1	0.588075
2.22769	3.3539	15.0292	0.000212005	0.00573955	Pde10a	23984	17	8525372	8986648	0.810086	0.939477	0.711834	0.653549	0.897288	1	0.966678	0.86246	0.802933	1	0.789604	0.619385	0.740647	0.809345	0.58921	0.890738	1	0.955324	0.897611	0.971008	1	0.875139	0.957611	1	0.661932	0.733917	0.503461	0.687312	0.882839	0.925822	0.879581	1	0.912481	0.826774	0.824811	0.887071	0.808656	0.914866	0.706772	0.767611
0.288609	6.9068	11.5321	0.00105539	0.0260649	Qk	19317	17	10202601	10319854	0.483653	0.561952	0.533122	0.521369	0.569431	0.598884	0.57584	0.56642	0.499836	0.509965	0.503518	0.517069	0.543927	0.49962	0.526685	0.509635	0.572101	0.606983	0.540441	0.603804	0.570304	0.544287	0.566977	0.591925	0.521399	0.501912	0.464395	0.484189	0.528315	0.557546	0.517935	0.571651	0.547914	0.589964	0.574778	0.536889	0.527655	0.530935	0.540247	0.524999
0.665178	6.75845	33.8912	1.08539e-07	3.99064e-06	Map3k4	26407	17	12227621	12318796	0.551373	0.547317	0.532344	0.567324	0.664557	0.708215	0.697466	0.69342	0.540475	0.554331	0.511732	0.522535	0.51657	0.527681	0.530278	0.53228	0.642255	0.616618	0.717711	0.673313	0.694791	0.676111	0.660924	0.628713	0.511647	0.503666	0.513846	0.490475	0.618174	0.588324	0.563041	0.641216	0.581772	0.646117	0.584671	0.614195	0.541786	0.543553	0.575337	0.564353
1.82979	1.11507	12.6503	0.00063711	0.0162688	4732491K20Rik	224523	17	12318853	12327250	0.532159	1	0.768043	0.702205	0.804344	1	0.805609	1	0.855091	0.440241	0.896751	0.618649	0.851002	1	0.741513	0.48956	1	1	1	1	1	0	1	0.509947	0.539754	0.585991	0.360986	0.790274	0.80642	0.787325	0.515442	0.84317	0.406061	0.564641	0.838522	0.608795	0.919425	0.791352	0.71632	0.442314
8.09295	5.97227	140.187	3.27245e-19	4.18361e-17	Slc22a3	20519	17	12418960	12507704	1	0.986887	1	0.996864	0.993242	1	1	1	1	0.979046	1	0.984603	1	1	0.994379	0.993231	1	1	1	1	1	0.993329	1	1	0.969164	0.981011	1	0.991231	0.962584	0.988978	0.986488	0.968506	0.988853	0.983436	0.98662	0.970536	0.995358	0.986687	0.997425	1
3.86276	8.03985	162.34	3.63412e-21	6.64331e-19	Igf2r	16004	17	12682406	12769664	0.961481	0.956813	0.952931	0.952009	0.910034	0.871274	0.91079	0.895222	0.967013	0.917742	0.961	0.881181	0.968427	0.946263	0.961112	0.967599	0.898154	0.874413	0.888645	0.7928	0.901935	0.865524	0.85884	0.911799	0.966559	0.954043	0.969456	0.960867	0.868818	0.880767	0.858954	0.928899	0.814487	0.868275	0.805507	0.787472	0.953142	0.954138	0.948361	0.960344
-5.37562	3.17372	130.108	1.26459e-18	1.44651e-16	Airn	104103	17	12741311	12860136	0.0985899	0.0483911	0	0	0	0	0.0258783	0.0222149	0.0364475	0.0134703	0.161783	0.0126453	0.0530258	0	0	0.107053	0.0491426	0	0	0	0	0.034431	0	0.0632943	0.069816	0	0.099721	0.0349652	0.0122465	0.0458726	0.0867382	0.0127893	0.045866	0.0470816	0.0450791	0	0.032845	0.0279304	0.0305979	0.11261
-6.36439	2.21917	105.778	2.98012e-16	2.26814e-14	Gm23833		17	12770631	12770882	0	0	0	0	0	0	0.0383216	0	0	0.140783	0	0.0812934	0.322474	0.059169	0	0	0.0858965	0	0	0	0	0	0	0	0.157994	0	0	0.0630459	0.0253758	0	0	0	0	0.0431643	0	0	0	0.0559463	0.0633516	0.0477025
-5.27045	1.44168	67.0728	7.94103e-12	3.81638e-10	Gm16574		17	12818793	12819537	0	0	0	0	0	0	0	0.129905	0	0.0820408	0	0	0	0	0	0	0	0	0	0	0	0	0	0	0	0	0.484939	0	0.0692392	0	0	0	0	0	0.0493645	0.341557	0.15979	0	0.0678939	0
-3.97706	0.989531	30.2432	4.50835e-07	1.58035e-05	Gm7162		17	12819819	12820842	0	0	0	0	0.506844	0	0	0	0.197348	0.0656141	0	0	0	0	0.323461	0	0	0.670673	0	0	0	0.128714	0	0	0	0.485492	0	0	0	0	0	0	0	0	0.206122	0.674791	0	0	0.486366	0
1.66557	1.54982	11.9235	0.000878119	0.0220205	Pnldc1	240023	17	12888729	12910230	0.912487	0.775253	1	0.386053	0.57812	0.930396	0.580083	0.776969	0.69649	0.519557	0.771566	1	0.729517	1	0.58921	0.64044	0.783445	0.753375	0.885522	0.804766	0.587379	0.911825	0.782326	0.912327	0.73785	0.653645	0.738532	0.790274	0.609708	0.559328	1	0.659339	0.754694	0.633602	0.437861	0.674791	0.791822	0.68086	0.586839	1
0.387596	6.4295	10.6591	0.00159712	0.0385675	Acat2	110460	17	12942890	12960747	0.612378	0.58214	0.561556	0.549513	0.54437	0.550433	0.545789	0.577152	0.558396	0.579873	0.590236	0.529086	0.546257	0.543713	0.563666	0.564422	0.580682	0.560696	0.543873	0.503678	0.572062	0.537109	0.593674	0.533828	0.502858	0.562956	0.555015	0.537641	0.557297	0.564653	0.533446	0.58852	0.547363	0.515097	0.523501	0.514168	0.566712	0.589338	0.548008	0.557839
0.599802	5.60816	30.9032	3.26962e-07	1.16068e-05	Sod2	20656	17	13006846	13040063	0.55587	0.584423	0.57957	0.614058	0.626149	0.662338	0.554224	0.662342	0.654516	0.532483	0.582129	0.63167	0.576464	0.56189	0.625164	0.57941	0.563103	0.619351	0.621426	0.62485	0.595448	0.564822	0.588069	0.541427	0.549761	0.527225	0.601269	0.533681	0.626878	0.579557	0.62569	0.613702	0.585671	0.594536	0.576228	0.546591	0.558043	0.582628	0.601503	0.534758
1.8766	4.15896	36.7578	3.87762e-08	1.47274e-06	Dact2	240025	17	14195052	14204304	0.595513	0.738376	0.773564	0.753342	0.740238	0.898402	0.950158	0.90526	0.717567	0.685225	0.754838	0.599372	0.784231	0.697769	0.761189	0.653766	0.883451	0.92531	0.93413	0.880395	0.85909	0.802663	0.956987	0.94864	0.605117	0.603648	0.650489	0.625878	0.831846	0.87846	0.926211	0.76923	0.869036	0.869413	0.871931	0.857496	0.596639	0.662364	0.781527	0.655588
-0.973643	2.12881	10.5298	0.00169904	0.0407769	Metrn	70083	17	25793221	25797136	0.288885	0.238725	0.288482	0.361399	0.339445	0.376885	0.429713	0.395108	0.52526	0.49574	0.512854	0.612658	0.603657	0.485425	0.488811	0.545221	0.643987	0.433005	0.407437	0.673313	0.68609	0.431283	0.57172	0.488198	0.529598	0.39778	0.882796	0.439785	0.510154	0.547269	0.233084	0.425037	0.394892	0.633602	0.509457	0.383661	0.427633	0.580856	0.486366	0.159911
-1.0575	2.20682	11.8101	0.000926065	0.0230749	Gm26694		17	25794894	25964784	0.403722	0.158357	0.280341	0.343833	0.272054	0.339548	0.341253	0.511027	0.445881	0.462428	0.391491	0.513256	0.676816	0.790506	0.396647	0.637463	0.579514	0.404347	0.255838	0.720381	0.747347	0.508383	0.621639	0.569781	0.609934	0.39778	0.790184	0.530614	0.560032	0.679017	0.175426	0.263851	0.434752	0.580435	0.734712	0.608795	0.410837	0.500216	0.395972	0.487639
3.72761	0.519603	18.7822	5.08725e-05	0.00148962	Gm16391		17	76284415	76284861	#NUM!	0.484738	1	1	1	1	1	1	1	1	1	1	1	1	1	1	#NUM!	1	1	#NUM!	1	0.837939	1	1	1	1	#NUM!	1	#NUM!	0.840982	1	1	1	0.861599	1	1	1	1	1	1
3.54764	0.768614	18.2611	6.02626e-05	0.00174887	Gda	14544	19	21391307	21473445	0.791301	1	1	1	0.672722	1	1	1	1	1	1	1	1	#NUM!	1	1	1	1	0.755748	1	1	0.805312	0.782326	1	1	#NUM!	1	1	0.757539	1	1	1	1	1	1	1	1	#NUM!	1	1
-3.79657	3.93973	22.6161	8.31956e-06	0.000259953	Gm27520		X	103480946	103481026	0.00777298	0.0252955	1	1	0.053313	0.0574899	#NUM!	1	0.00673693	0.287541	1	1	0.0112053	0.0724831	#NUM!	#NUM!	0.0159759	0.010773	#NUM!	#NUM!	0	0.0283829	#NUM!	#NUM!	0	0.0162849	1	#NUM!	0.0573286	0.0332013	#NUM!	#NUM!	0.00670157	0.0131275	#NUM!	1	0.0625551	0.124178	#NUM!	#NUM!
1.00511	2.19092	11.6275	0.00100901	0.0250779	Gm15190		X	159584783	159585058	0.637732	0.560777	0.825486	0.641845	0.698109	0.738741	0.721461	0.65292	0.572852	0.595903	0.529607	0.548878	0.553071	0.463732	0.459453	0.598704	0.814575	0.753375	0.607392	0.481184	0.307335	0.733874	0.74195	0.509947	0.724287	0.775779	0.508761	0.44355	0.744643	0.62436	0.739354	0.933237	0.599812	0.689764	0.805985	0.784071	0.59908	0.321617	0.639699	0.599296
1.43215	2.20314	23.2973	6.30774e-06	0.000200291	Slc25a5	11740	X	36795651	36798807	0.860361	0.721222	0.817973	0.576703	0.813709	0.615305	0.691815	0.728807	0.445881	0.387253	0.616623	0.686525	0.857728	0.767535	0.643646	0.928304	0.659643	0.725835	0.649919	0.822611	0.67433	0.657591	0.598976	0.476583	0.701091	0.790551	0.653143	0.918728	0.476789	0.747577	0.864543	0.728862	0.594323	0.710349	0.620063	0.700088	0.573942	0.579688	0.703024	0.458288
1.9169	2.29937	11.4849	0.00107912	0.0265839	Arhgap6	11856	X	168795099	169304435	0.825769	0.770635	0.572691	0.758688	0.711534	0.908588	1	1	0.809949	0.538625	0.520538	0.388911	0.857728	0.803454	0.593902	0.584489	0.654579	0.854119	1	1	0.795181	0.778563	1	1	0.621478	1	1	1	0.704184	0.679017	1	1	0.94861	0.509218	1	1	0.587857	0.728742	1	1
2.04981	2.14291	11.1769	0.00126617	0.0309967	Sh3kbp1	58194	X	159627272	159978069	0.763193	0.628718	1	1	0.658358	0.672824	1	1	0.643245	0.246818	1	1	0.826376	0.715554	1	1	1	1	1	1	0.734099	0.961268	1	0.916151	0.849152	0.790551	1	1	0.714245	0.620443	1	1	0.94993	1	1	1	0.454158	0.703305	1	1
2.21153	0.80635	10.7353	0.00163445	0.0393717	Gm14634	552913	X	12762278	12821492	1	0.319904	1	1	1	0.804417	1	1	1	1	1	1	1	1	#NUM!	1	1	1	1	#NUM!	1	1	1	1	0.73785	1	1	1	0.879376	1	1	1	0.891353	0.838392	1	1	0.74044	0.558353	1	1
2.40294	1.7719	12.7483	0.000598249	0.0153164	Sox3	20675	X	60891366	60893430	0.623894	0.803019	1	1	0.656202	0.606662	1	1	0.440335	0.551344	1	1	0.732388	0.530962	1	1	0.911789	0.404347	1	1	0.446054	0.608021	1	1	0.628082	0.702294	1	1	0.757539	0.376718	1	1	0.506298	0.75685	1	1	0.240678	0.43687	1	0.922462
2.42099	1.1826	13.3451	0.000463372	0.0120847	F8	14069	X	75172715	75382615	0.688645	0.868166	1	1	0.506844	0.672824	1	1	1	0.843922	1	1	1	1	1	1	0.407968	0.670673	1	#NUM!	0.596611	0.608021	1	0.935767	0.484058	0.485492	1	1	0.645711	0.590557	1	1	1	1	1	1	1	0.850504	1	1
2.49287	2.72974	11	0.00137653	0.0334057	Bgn	12111	X	73483602	73495933	0.929926	0.568419	1	1	0.661331	0.860518	1	1	0.932289	0.706154	1	1	0.947607	0.876163	1	1	1	1	1	1	0.564103	0.794994	1	1	1	0.94717	1	1	0.521256	0.361158	1	1	0.754694	0.89816	1	1	0.571046	0.523333	1	1
2.50259	2.62697	11.8262	0.000919082	0.0229363	Tmem47	192216	X	81070698	81097872	0.503871	0.600833	1	1	0.488319	0.869851	1	1	0.517581	0.56725	1	1	0.723586	0.611236	1	1	0.805243	0.433005	1	1	0.608296	0.654679	1	1	0.652344	0.868512	1	1	0.257694	0.260668	1	1	0.380923	0.532999	1	1	0.459693	0.44139	1	0.970855
2.51276	2.14347	23.4274	5.98418e-06	0.000190636	Rbm3os	70226	X	8145429	8147964	0.654672	0.617259	1	0.959317	0.738653	0.736211	1	1	0.779761	0.673684	1	1	0.86951	0.927195	1	1	0.694566	0.775887	1	1	0.795181	0.770687	1	1	0.640622	0.667239	0.933875	1	0.510154	0.613388	1	1	0.639163	0.660491	1	1	0.74044	0.68871	1	1
2.51301	3.15235	20.0324	2.42459e-05	0.000731867	Rtl8b	553127	X	53669177	53670408	0.853433	0.759515	0.907199	0.914912	0.645181	0.918769	1	1	0.954843	0.82447	0.937713	0.913136	0.981258	0.821809	0.868385	0.91342	1	0.918038	1	1	0.408353	0.955979	0.948675	1	0.959109	0.9054	0.887453	0.858575	0.914346	0.779041	0.969616	1	0.786864	0.933365	1	1	0.836996	0.887944	0.837967	0.941792
2.51533	2.27822	22.7347	7.92693e-06	0.000248479	Tmsb4x	19241	X	167207093	167209315	0.549291	0.674232	1	1	0.690096	0.891609	1	1	0.943564	0.38059	0.889405	0.81957	0.938388	0.767535	1	0.87036	0.478841	0.918038	0.83758	0.902673	0.775331	0.909768	0.860358	0.937844	0.90368	1	0.929484	1	0.738686	0.857015	1	0.967853	0.945752	0.729559	0.967864	0.919434	0.635476	0.780495	0.9561	1
2.51958	2.77627	16.7013	0.000101145	0.00285896	Mid1ip1	68041	X	10715013	10719690	0.768392	0.675652	1	1	0.654862	0.784739	1	1	0.651399	0.538625	1	1	0.791999	0.677038	1	1	0.814575	0.723631	1	1	0.939502	0.856034	0.975013	1	0.753035	0.693689	1	1	0.390577	0.545857	1	1	0.924847	0.75685	1	1	0.580382	0.51614	1	1
2.59138	2.65718	13.6197	0.000400895	0.0105823	Trpc5os	100503240	X	144456581	144477066	0.663842	0.758213	1	1	0.528566	0.822286	1	1	0.812288	0.551344	1	1	0.87714	0.585926	1	1	0.837879	0.566945	1	1	0.650781	0.674077	1	1	0.686436	0.557158	1	1	0.553918	0.289174	1	1	0.64862	0.954026	0.943236	1	0.352066	0.422863	1	1
2.59742	1.20627	20.1316	2.32569e-05	0.000703099	Gm14820		X	8042943	8074619	0.850465	0.319904	1	1	0.837101	0.738741	1	0.893172	1	0.855043	0.920512	1	0.704124	0.611236	1	1	0.436695	1	0.83758	1	0.861338	0.608021	1	1	0.413025	0.825115	1	1	0.892838	0.881009	0.841739	1	0	0.67481	1	1	1	0.654741	1	1
2.60624	3.94486	11.6229	0.00101121	0.0251006	Hs6st2	50786	X	51387212	51681856	0.486626	0.594564	0.987717	1	0.738085	0.722285	1	1	0.457401	0.413185	1	1	0.60736	0.373753	1	1	0.851457	0.678954	1	1	0.790611	0.678248	1	0.993676	0.500187	0.607875	1	1	0.460456	0.351019	1	1	0.707369	0.73604	1	1	0.33438	0.338354	1	1
2.66201	3.3762	12.0324	0.000834509	0.0209806	Smarca1	93761	X	47809368	47892974	0.553484	0.640381	1	1	0.660487	0.898402	1	1	0.756948	0.675287	1	1	0.624885	0.456089	1	1	0.868686	0.629228	1	1	0.819474	0.778563	1	1	0.484058	0.622828	1	1	0.50035	0.402304	1	1	0.506298	0.67481	1	1	0.532944	0.451582	1	1
2.67043	4.23919	12.0297	0.000835576	0.0209806	Nhsl2	100042480	X	101849385	102092055	0.479388	0.506113	1	1	0.722909	0.817379	1	1	0.662955	0.478505	1	1	0.588117	0.33919	1	0.987444	0.850413	0.556706	1	1	0.734099	0.805312	1	1	0.401249	0.505499	1	1	0.564698	0.38588	0.990687	0.98905	0.754694	0.624075	0.986038	1	0.359191	0.323859	0.992003	1
2.6812	2.0496	19.7521	2.72822e-05	0.000819724	Cnksr2	245684	X	157821436	158043294	0.754942	0.711774	1	1	0.869799	0.590083	1	0.926151	0.880613	0.710795	1	1	0.755724	0.691402	1	1	1	0.876964	1	1	0.715448	0.850469	1	1	0.933656	0.876192	1	1	0.565562	0.458339	1	1	1	0.925655	1	1	0.513748	0.608086	1	1
2.6946	2.69601	16.3473	0.000118142	0.00329651	Bex2	12069	X	136066564	136068236	0.516063	0.758213	0.904401	0.970599	0.793988	0.822286	0.957972	1	0.769789	0.534224	0.967655	0.97526	0.537776	0.207633	1	0.947978	0.688954	0.670673	1	1	0.713032	0.897854	1	1	0.774778	0.862839	1	0.951883	0.54854	0.328932	1	1	0.637421	0.818053	1	1	0.540715	0.520071	1	1
2.70906	5.43661	18.021	5.70369e-05	0.00166018	Ftx	78878	X	103560907	103623790	0.72455	0.695703	0.990126	1	0.680776	0.585718	0.994666	1	0.788648	0.724389	0.995647	1	0.784776	0.7362	1	0.995129	0.690708	0.684526	1	1	0.710885	0.675073	1	1	0.78053	0.783588	0.993967	1	0.787623	0.774652	0.976849	1	0.72749	0.724807	1	1	0.746606	0.686627	0.995449	1
2.70956	0.192601	12.4244	0.00076742	0.0193687	Tceal5	331532	X	136200948	136203876	1	0.585258	1	1	#NUM!	1	1	1	1	1	#NUM!	1	1	1	1	1	1	1	1	#NUM!	1	1	1	1	1	1	1	1	1	1	1	1	1	0.509218	1	1	1	0.387302	1	1
2.74404	1.40844	16.3862	0.000116141	0.00325461	Gm14493		X	10717473	10718710	0.883493	0.721222	1	1	0.642675	0.860518	1	1	0.567344	0.440241	1	1	0.890005	0.849852	1	1	0.870445	0.670673	1	1	1	0.8612	1	1	0.789598	0.414419	1	1	0	0.434788	1	1	1	0.580435	1	1	0.487414	0.542383	0.924868	1
2.7478	4.72728	10.7289	0.0015447	0.0373479	Armcx4	100503043	X	134686519	134696757	0.629399	0.487529	1	0.995247	0.645465	0.867636	1	1	0.431806	0.547649	1	0.995755	0.363523	0.272831	1	1	0.759936	0.709622	1	1	0.730104	0.728488	1	1	0.454731	0.564736	1	1	0.557308	0.372537	1	0.99814	0.804	0.516906	1	0.958026	0.437277	0.380993	1	1
2.75543	0.588432	12.4694	0.000705395	0.0179422	Gm14869		X	109120801	109121684	0.654672	0.484738	1	1	1	1	1	1	0.662955	0	#NUM!	1	1	1	1	1	1	1	1	1	#NUM!	0.8612	1	1	1	0	#NUM!	1	0.862045	0.863877	1	1	1	1	1	1	0.487414	0.703305	1	1
2.76288	1.86415	16.8158	9.62046e-05	0.00273512	Tsc22d3	14605	X	140539528	140600659	0.623894	0.80892	1	1	0.755098	0.942699	0.911977	1	1	0.424403	1	1	0.487683	0.430096	1	1	0.756154	1	1	1	0.844607	0.805312	1	1	0.73785	1	1	1	0.851368	0.638056	1	1	1	0.912093	1	1	0.566627	0.394629	1	1
2.79485	1.61919	34.6959	9.77681e-08	3.6082e-06	Uxt	22294	X	20941722	20962017	0.941569	0.824678	0.850215	0.721744	0.642675	1	1	1	0.815691	0.688666	1	1	0.740647	1	1	1	1	1	1	1	1	1	1	1	1	0.904178	1	1	1	0.808827	1	1	1	1	1	1	0.850866	0.895109	0.876571	0.835418
2.82227	4.54876	14.5533	0.000262514	0.00703393	Stard8	236920	X	99003248	99074728	0.633233	0.586779	1	1	0.668882	0.839316	1	1	0.788444	0.750793	1	0.996325	0.679847	0.440129	1	1	0.799476	0.841141	1	1	0.67433	0.678591	1	1	0.625175	0.699042	1	1	0.706299	0.496976	1	0.99649	0.917188	0.723487	1	1	0.534943	0.521879	1	1
2.82546	0.272419	11.9444	0.000961122	0.023918	Map7d3	320923	X	56797858	56822326	1	0.484738	1	1	0.506844	1	1	1	#NUM!	1	#NUM!	1	1	1	#NUM!	1	1	1	1	1	0	1	1	1	1	#NUM!	1	1	0	0.413539	1	1	1	#NUM!	1	#NUM!	1	0.486703	1	1
2.86683	0.185839	10.6707	0.00177221	0.0423771	Gm23656		X	105873824	105873935	1	1	1	1	0.506844	#NUM!	1	1	1	#NUM!	1	#NUM!	1	#NUM!	1	1	1	0	1	1	0.67433	0.508383	1	1	#NUM!	#NUM!	1	#NUM!	1	0.808827	1	1	#NUM!	1	1	#NUM!	#NUM!	1	#NUM!	#NUM!
2.86707	7.0736	12.0486	0.000828198	0.0208737	Taf1	270627	X	101532734	101601789	0.526479	0.542657	0.998233	1	0.643008	0.647094	0.996876	0.996247	0.510925	0.523732	0.993953	0.977919	0.626238	0.514862	0.997904	1	0.650104	0.637399	0.998142	0.992684	0.619433	0.596891	1	0.998287	0.509896	0.505118	1	1	0.638652	0.616723	0.996154	1	0.645741	0.607227	0.995919	0.996618	0.533622	0.479749	0.99648	0.998225
2.87842	2.91062	19.1219	3.68907e-05	0.00109663	Armcx1	78248	X	134717963	134721917	0.806605	0.624684	1	1	0.755098	0.92503	1	1	0.949203	0.636064	1	1	0.86951	0.435613	1	1	1	1	1	1	0.724371	0.88579	1	1	0.882431	1	1	1	0.747739	0.703024	1	1	0.974322	0.900781	1	1	0.46115	0.394008	1	1
2.89513	3.90248	14.3987	0.000281474	0.00752136	Capn6	12338	X	143802231	143827414	0.812497	0.604545	1	1	0.593162	0.903855	0.979665	0.968059	0.932289	0.593528	1	1	0.90043	0.648591	1	1	0.768649	0.767944	1	1	0.660001	0.807465	1	0.972824	1	0.84551	1	1	0.675632	0.385937	1	1	0.891353	0.683704	1	1	0.507029	0.47716	1	1
2.91375	0.937365	15.19	0.000197302	0.00538246	Gm27987		X	103605225	103605317	0.486626	1	1	1	1	0.606662	1	1	0.495836	1	1	1	1	0.653584	1	1	0.770608	0.753375	1	1	0.756448	0.805312	1	#NUM!	1	0.653645	1	1	0.838899	1	1	1	0.754694	0.509218	1	#NUM!	0.655385	1	1	1
2.92728	2.4315	27.5077	1.19106e-06	4.01676e-05	Gm9159		X	103597771	103598336	0.763193	0.723239	1	1	0.860462	0.843706	1	1	0.529185	0.632411	1	1	0.833265	0.758717	1	1	0.749128	0.580168	1	1	0.756448	0.690144	1	1	0.814067	0.849887	1	1	0.690565	0.679017	1	1	0.869551	0.939626	1	1	0.607104	0.703305	1	0.879471
2.92829	1.5515	15.9617	0.000140038	0.0038853	Spin2c	278240	X	153832225	153834243	0.654672	0.484738	1	1	0.891564	0.860518	1	1	0.495836	0.515745	0.85273	1	0.655627	0.882997	1	1	1	0.604332	1	1	0.694904	0.756235	1	1	0.789598	1	1	1	0.735255	0.402304	1	1	1	0.838392	1	1	0.442092	0.372103	1	1
3.01191	0.143262	12.694	0.000755439	0.0191156	Magix	54634	X	7673164	7681251	0.654672	1	1	1	1	1	1	1	1	0.662869	#NUM!	1	#NUM!	1	1	1	#NUM!	1	1	1	#NUM!	1	1	#NUM!	1	1	1	1	#NUM!	0.514025	#NUM!	#NUM!	1	1	1	1	1	#NUM!	1	1
3.0199	0.694809	13.4693	0.00048528	0.0126057	Gpm6b	14758	X	166238911	166388988	0.739834	0.585258	1	1	1	0.755183	#NUM!	1	1	1	1	1	1	0.485425	1	1	1	1	1	1	0.633094	1	1	1	1	1	#NUM!	1	0.510154	0.514025	1	1	1	#NUM!	1	1	0.624634	0.558353	1	1
3.02678	1.52391	24.9752	3.21726e-06	0.000104188	Tspan7	21912	X	10485158	10596605	0.654672	0.80892	1	1	0.755098	1	1	1	0.843973	0.803778	1	0.964607	1	0.693632	0.925545	1	1	0.448914	1	1	0.729127	1	1	1	0.789598	1	1	1	0.426572	0.514025	1	0.906344	0.804	0.509218	1	1	0.768953	0.623965	1	1
3.04119	0.14773	11.7003	0.0019319	0.046083	1700031F05Rik	73300	X	102859186	102867971	1	1	#NUM!	1	1	1	1	1	1	1	0.391491	1	#NUM!	#NUM!	1	1	#NUM!	1	1	#NUM!	#NUM!	#NUM!	#NUM!	1	1	1	1	0.790274	1	1	1	1	1	1	#NUM!	1	1	0.654741	1	1
3.09572	0.934796	12.3486	0.000750446	0.0190139	Aff2	14266	X	69360294	69868037	0.486626	0.687021	0.904401	1	0.935017	1	1	1	1	0.49574	1	1	#NUM!	0	1	1	0.508273	#NUM!	1	1	#NUM!	0.72108	1	1	1	1	1	1	0.294076	0.260668	1	1	#NUM!	#NUM!	#NUM!	#NUM!	0.432049	0.486703	1	1
3.11749	3.22555	17.9489	5.8835e-05	0.00170997	Tro	56191	X	150645304	150657583	0.51296	0.806435	0.979695	1	0.748052	0.89733	1	1	0.430694	0.48223	1	1	0.655627	0.485425	1	1	0.923426	0.689598	1	1	0.489434	0.817556	1	1	0.584597	0.576807	1	1	0.597308	0.396913	1	0.986508	0.672241	0.715893	1	1	0.460196	0.316505	0.951384	0.973094
3.1383	0.535437	16.1201	0.000146848	0.00406272	Zcchc12	72693	X	36195904	36199158	0.321551	1	1	1	0.755098	1	1	1	1	1	1	1	1	0.585926	1	1	1	1	1	1	1	1	1	1	1	1	1	#NUM!	#NUM!	#NUM!	#NUM!	1	1	0.509218	#NUM!	1	0.487414	0.321617	1	1
3.15059	5.02562	22.8331	7.61554e-06	0.000239871	Gm38020		X	103576426	103581101	0.773715	0.815638	0.994257	1	0.731027	0.610191	0.991954	1	0.839434	0.711748	1	0.990663	0.828502	0.768551	1	1	0.666734	0.518277	1	0.992863	0.601481	0.677474	1	1	0.840808	0.810452	1	1	0.716355	0.692085	1	1	0.708132	0.686561	1	1	0.809249	0.752418	0.994972	1
3.15293	4.25823	28.101	9.4722e-07	3.2166e-05	5530601H04Rik	71445	X	105037197	105079609	0.797037	0.791764	0.989109	1	0.712067	0.755183	1	1	0.901123	0.779133	1	1	0.904935	0.908739	1	0.98903	0.756154	0.598412	1	1	0.736117	0.704508	1	0.982191	0.902207	0.813578	1	1	0.64036	0.634166	1	1	0.691352	0.789695	1	1	0.845384	0.680206	0.990491	1
3.1636	2.95999	15.2464	0.000192394	0.00525591	Dgkk	331374	X	6779306	6948363	0.684206	0.738376	1	1	0.849684	0.887426	1	1	1	0.617605	1	1	#NUM!	0.273963	1	1	0.756154	1	1	1	0.811809	0.897854	1	1	0	0.738959	1	1	0.627521	0.522347	1	1	#NUM!	0.805835	1	1	0.311677	0.486703	0.982415	1
3.16405	0.910885	19.7082	2.88349e-05	0.000862403	Gm15267		X	152043049	152043512	1	1	1	1	1	0.506959	0.878824	0.806965	1	1	0.828332	1	1	1	1	1	0.720992	0.802877	1	1	0.67433	#NUM!	0.33925	0.67545	1	0.738959	1	1	0.757539	0.787325	1	1	0.60603	0.75685	0.25716	0.571531	1	0.486703	1	1
3.1861	0.116344	13.4037	0.000514168	0.0132855	Gm14593		X	53772836	53773129	1	1	1	1	1	0.755183	1	#NUM!	1	1	1	1	#NUM!	1	0	1	1	1	1	#NUM!	#NUM!	1	1	1	1	1	1	#NUM!	1	#NUM!	#NUM!	1	1	1	1	1	1	1	0	1
3.18727	0.246035	13.5985	0.000421779	0.0110738	Rps12-ps1		X	103489517	103489917	#NUM!	1	1	1	1	0	#NUM!	1	1	1	1	1	#NUM!	1	1	1	0	0.604332	0.507723	0	0.756448	0.674077	0.506626	#NUM!	1	#NUM!	1	0.824874	0.510154	0.514025	1	1	#NUM!	1	#NUM!	1	1	1	1	1
3.19325	0.82388	12.9588	0.000575809	0.0147612	Pcyt1b	236899	X	93654863	93749951	0.825769	1	1	1	0.606552	1	1	1	1	1	1	1	1	1	1	1	1	0.337364	1	#NUM!	0.608296	0	1	1	1	0.738959	0.903986	1	0.609708	0.442365	1	1	1	0.341578	#NUM!	1	1	0.61245	1	1
3.19761	3.63661	41.6038	7.22003e-09	2.85878e-07	Hmgb3	15354	X	71555918	71560676	0.796337	0.797121	0.956956	0.959831	0.811453	0.917788	0.959157	0.986124	0.961655	0.634612	1	0.976397	0.755724	0.816832	1	1	0.986921	0.819022	0.966142	0.966504	0.945012	0.748304	0.958514	0.965321	0.971244	1	1	0.951883	0.53714	0.376718	0.961535	0.969932	0.804	0.695367	0.838522	0.850882	0.611483	0.701627	0.984251	1
3.21243	0.143737	10.6187	0.00195189	0.0465029	Frmd7	385354	X	50895180	50942710	1	#NUM!	1	1	1	1	1	#NUM!	1	1	1	1	1	1	1	#NUM!	1	1	1	#NUM!	1	1	#NUM!	1	1	1	#NUM!	#NUM!	1	0.840982	1	#NUM!	1	1	1	1	0	1	#NUM!	1
3.22593	3.69574	19.8627	2.60402e-05	0.00078361	Pwwp3b	245631	X	139210042	139238335	0.759596	0.781976	1	1	0.736688	0.79622	1	1	0.977413	0.546167	1	1	0.891891	0.452185	1	1	0.731549	0.968302	1	1	0.913495	0.785124	1	0.98988	1	0.901201	1	1	0.691895	0.528021	1	0.994684	0.827161	0.919441	1	1	0.633966	0.605688	1	1
3.24765	0.194482	14.86	0.000255954	0.00686757	Gm15013		X	139713681	139714481	0.486626	#NUM!	#NUM!	1	1	1	1	1	0.495836	1	1	1	0.487683	1	1	1	0.508273	1	1	1	1	1	#NUM!	1	#NUM!	0.738959	1	#NUM!	1	0.514025	1	#NUM!	1	#NUM!	1	1	1	1	1	#NUM!
3.25162	1.25669	29.546	5.45305e-07	1.8979e-05	Pdzd4	245469	X	73793359	73824969	0.810086	0.714994	1	1	1	0.930396	1	1	0.774885	1	1	1	1	0.702237	1	1	0.942982	1	1	1	0.721312	0.878622	1	1	0.73785	1	1	1	0.675632	0.131268	1	1	0.849405	0.861599	1	1	0.826222	0.703305	1	1
3.25257	4.77564	31.662	2.4636e-07	8.8744e-06	Cited1	12705	X	102247381	102252181	0.790264	0.802	1	1	0.942249	0.848442	1	0.995354	0.878397	0.817471	0.988922	1	0.980917	0.876163	1	1	0.992613	0.989206	1	1	0.786034	0.910001	1	1	0.95571	0.951959	1	1	0.825599	0.847398	1	1	0.880721	0.890025	1	1	0.87458	0.830479	0.985835	0.988201
3.26467	1.63795	13.1494	0.000506678	0.0131093	Pcdh19	279653	X	133582860	133688987	0.850465	0.824678	1	1	0.804344	1	0.935504	1	1	0.595903	1	1	#NUM!	0	1	1	#NUM!	#NUM!	1	#NUM!	1	0.8612	#NUM!	1	1	1	1	1	0.80068	0.395148	1	1	#NUM!	0	1	1	0.587857	0.825812	1	1
3.27037	4.71336	34.9922	7.28606e-08	2.69915e-06	Pbdc1	67683	X	105079756	105117090	0.877705	0.851186	1	0.993206	0.727268	0.709475	0.981603	0.992637	0.922383	0.784846	0.993047	1	0.978023	0.887569	0.993777	0.993444	0.766455	0.794337	1	1	0.70825	0.740312	1	0.98586	0.954962	0.901392	1	1	0.736121	0.685826	1	1	0.730909	0.802213	0.981106	0.990358	0.900648	0.830129	0.994558	1
3.27152	4.09275	16.4157	0.000114643	0.00321723	Itm2a	16431	X	107397099	107403376	0.850465	0.687021	1	0.978821	0.695965	0.822286	1	1	1	0.829774	1	0.992349	0.655627	0.414353	1	1	0.743209	1	1	1	0.746618	0.641086	1	0.979091	0.924223	0.924624	1	1	0.776363	0.763813	1	0.99367	1	0.947801	1	1	0.738212	0.661458	1	1
3.27436	5.55789	23.1393	6.72478e-06	0.000213188	Suv39h1	20937	X	8061171	8074760	0.663246	0.73151	1	0.989779	0.75764	0.810286	1	0.996247	0.788141	0.653712	0.99603	1	0.870581	0.722296	1	0.994654	0.854588	0.768295	1	1	0.763408	0.775478	1	0.997105	0.563564	0.717352	1	1	0.677971	0.674412	1	0.995371	0.796274	0.701741	0.98182	1	0.617161	0.497211	0.989818	0.976984
3.32194	0.274988	11.8799	0.00106931	0.0263755	Gm15482		X	53969437	53975000	0.486626	#NUM!	#NUM!	#NUM!	1	1	1	1	#NUM!	#NUM!	#NUM!	1	#NUM!	#NUM!	1	#NUM!	1	1	1	1	1	1	1	1	#NUM!	#NUM!	#NUM!	#NUM!	1	1	1	1	#NUM!	#NUM!	1	#NUM!	0	#NUM!	1	#NUM!
3.32513	0.569215	15.6249	0.000214567	0.00579686	Gm15016		X	135988547	135989266	1	0.79005	1	1	1	1	#NUM!	#NUM!	1	1	1	1	1	1	1	1	1	#NUM!	1	1	1	1	#NUM!	1	1	1	1	1	1	1	#NUM!	1	1	1	1	1	0.869388	0.919213	1	1
3.32565	1.78658	42.0557	6.99417e-09	2.78061e-07	Slc6a8	102857	X	73673150	73682502	0.869029	0.838035	0.938029	0.904142	1	0.948739	1	0.851809	1	1	1	0.968893	1	0.868481	1	0.950451	1	1	1	1	0.713032	1	1	1	0.849152	0.585991	1	1	0.908205	0.947316	1	0.922045	1	0.861599	1	1	1	0.850504	1	1
3.34569	4.11659	31.039	3.10761e-07	1.10719e-05	Wdr13	73447	X	8123301	8132892	0.737133	0.767044	0.985331	1	0.851971	0.894806	0.987294	1	0.787928	0.769348	1	1	0.74567	0.937127	1	1	0.845829	0.842415	1	1	0.895449	0.837939	1	1	0.533181	0.657042	1	1	0.679128	0.632189	1	1	0.733764	0.836782	1	1	0.732178	0.783181	1	1
3.35564	2.69719	21.5879	1.26859e-05	0.000390766	Phf6	70998	X	52912266	52956943	0.892405	0.784735	1	0.983704	0.682433	0.89733	1	1	0.873167	0.554618	1	1	1	0.693632	1	1	0.957877	1	1	1	0.794189	0.73984	1	1	0.849152	0.721829	1	1	0.510154	0.435967	1	1	0.506298	0.75685	1	1	0.404482	0.598395	1	0.974405
3.37212	0.0713331	12.6006	0.000897718	0.0224832	Gm14523		X	23364506	23365063	1	#NUM!	#NUM!	1	1	1	1	1	1	0	1	1	#NUM!	1	#NUM!	1	1	#NUM!	1	1	1	1	1	1	#NUM!	1	#NUM!	#NUM!	#NUM!	1	#NUM!	1	1	1	#NUM!	1	1	1	1	1
3.37838	0.0798876	11.9964	0.0012777	0.0312007	Taf7l	74469	X	134460118	134476490	1	#NUM!	1	#NUM!	1	1	1	1	1	1	1	1	1	#NUM!	1	#NUM!	1	1	1	1	#NUM!	1	#NUM!	1	1	1	1	1	#NUM!	#NUM!	#NUM!	#NUM!	1	1	1	1	1	#NUM!	1	#NUM!
3.39453	1.07838	27.3403	1.35295e-06	4.52369e-05	Akap14	434756	X	37150698	37168842	0.739834	1	1	1	0.877964	0.755183	1	1	1	1	1	1	0	1	1	1	0.770608	1	1	1	0.892269	0.823118	1	1	0.73785	0.809387	1	1	0.593172	0.679017	1	1	1	0.75685	1	1	0.904843	0.883525	1	1
3.39674	0.194678	18.6618	6.40631e-05	0.00185366	Maob	109731	X	16709282	16817366	1	1	1	1	0.755098	1	1	1	1	1	1	1	1	1	1	1	0.508273	1	1	#NUM!	0.67433	1	1	#NUM!	#NUM!	#NUM!	1	1	1	1	#NUM!	1	#NUM!	#NUM!	1	#NUM!	1	1	1	1
3.41132	2.13739	16.7162	0.000100487	0.00284446	Sept6	56526	X	36911326	36991794	1	0.849501	1	1	0.585606	0.782552	1	1	0.940247	0.541226	1	1	1	0.653584	1	1	0.783445	0.753375	1	1	0.437087	0.72108	1	1	1	0.904178	1	1	0.790588	0.319773	1	1	1	0.408882	1	1	0.627193	0.575291	1	1
3.41643	0.640345	22.5207	1.60004e-05	0.000487489	Gm24380		X	139654294	139654617	1	0.767044	1	1	1	1	1	1	1	1	1	1	1	1	1	1	1	1	1	1	1	1	1	1	1	1	1	1	1	1	1	1	1	1	1	1	1	1	1	1
3.42447	2.42768	32.4034	1.87218e-07	6.81932e-06	Cask	12361	X	13517080	13851367	0.815618	0.969684	1	1	0.732669	0.727772	0.953962	1	0.873167	0.843922	1	1	0.826376	0.809345	1	1	0.85598	0.859343	1	1	0.838096	0.830853	1	1	0.967765	1	1	1	0.639052	0.514025	1	1	0.877729	0.592268	0.946396	1	0.550072	0.664719	1	1
3.43535	0.529545	19.684	3.30515e-05	0.000983998	Gm14853		X	105844465	105845013	0.654672	1	#NUM!	1	1	1	1	1	#NUM!	0.595903	1	1	1	1	1	1	1	1	1	1	1	1	1	1	1	1	1	0.824874	0.862045	0.514025	1	1	0.877729	0.67481	1	1	0.74044	0.739892	1	1
3.43917	0.98189	23.5191	6.05702e-06	0.000192643	Hdac8	70315	X	102284639	102505359	1	0.894368	1	1	#NUM!	0.672824	1	1	0.831007	0.662869	1	1	1	1	1	1	0.67398	1	1	1	0.930838	1	0.877871	1	1	1	1	1	0.757539	0.787325	1	1	0.60603	0.580435	1	1	1	0.895109	1	1
3.44414	4.95833	22.283	9.53293e-06	0.000296445	Maged2	80884	X	150806370	150814345	0.793161	0.616097	1	1	0.796146	0.920103	1	0.990131	0.900152	0.56416	1	1	0.922474	0.551278	1	1	0.889374	0.950852	1	0.989673	0.761905	0.874269	1	0.994507	0.940266	0.908886	0.986566	1	0.775644	0.608429	1	0.997639	0.93872	0.867921	1	1	0.571567	0.528201	1	1
3.44639	2.56033	14.9554	0.000224293	0.00605128	Apln	30878	X	48025146	48034853	0.89508	0.711774	1	1	0.760129	1	1	1	1	0.749192	1	1	#NUM!	0.239226	1	1	#NUM!	1	1	1	0.897959	0.7289	1	1	1	0.386153	1	1	0.593172	0.326503	1	1	0.836803	0.509218	1	1	0.54309	0.625555	1	1
3.45081	1.73124	26.7638	1.59047e-06	5.29075e-05	Gprasp2	245607	X	135839034	135844730	0.703242	0.918627	1	1	0.804344	1	0.943108	0.954342	0.887233	0.466345	1	1	0.925233	0.809345	1	1	1	0.670673	1	#NUM!	0.805492	0.805312	0.836982	1	0.73785	0.825115	1	1	0.776363	0.451354	1	1	0.782101	1	1	0.861588	0.6034	0.486703	1	1
3.46964	0.354125	16.4566	0.00013354	0.00371556	Cetn2	26370	X	72913532	72918411	1	1	1	1	1	#NUM!	1	0.806965	1	1	#NUM!	1	1	#NUM!	1	1	1	#NUM!	0.673497	1	1	1	1	1	1	1	1	1	0	0.514025	1	#NUM!	1	1	1	1	0.655385	1	1	1
3.4719	8.27569	17.6285	6.7563e-05	0.00194916	Rps4x	20102	X	102184941	102189394	0.495166	0.51724	0.992733	0.989599	0.823944	0.812845	0.994753	0.996903	0.555892	0.510697	0.992704	0.984417	0.681257	0.504608	0.991461	0.995278	0.813069	0.779975	0.998615	0.998908	0.796322	0.81317	0.996191	0.998596	0.640434	0.64856	0.992891	0.99734	0.869878	0.853268	0.997381	0.997134	0.829991	0.865094	0.997315	0.998871	0.559904	0.514049	0.996449	0.991165
3.47616	0.418063	14.6823	0.000406672	0.0107059	Gm23322		X	109009681	109009847	#NUM!	1	1	1	#NUM!	#NUM!	1	1	1	1	1	1	1	#NUM!	#NUM!	1	1	1	1	1	1	1	1	1	1	1	1	1	1	1	1	1	1	1	1	1	1	1	1	1
3.48228	2.91695	30.2586	4.16514e-07	1.46793e-05	Tceal8	66684	X	136168984	136172342	0.778799	0.773256	1	1	0.877964	0.869851	1	0.964505	0.880613	0.670666	1	1	0.944856	0.644651	1	0.971072	0.909732	1	1	1	0.708963	0.882315	1	1	0.844758	0.970611	1	0.957643	0.892838	0.67041	1	1	0.918571	0.853165	0.954068	1	0.683657	0.686784	1	1
3.49304	0.472453	16.4458	0.000113138	0.00317956	5730405O15Rik	70489	X	13042015	13045297	0.486626	1	1	1	1	1	1	1	0.329642	1	1	1	1	0.653584	1	1	0.508273	0.717962	#NUM!	1	1	0	1	1	0	1	1	1	0.862045	0	1	1	1	0.75685	1	1	1	0.768447	#NUM!	1
3.5144	0.35402	19.1226	5.23479e-05	0.00152825	Pnma3	245468	X	73064787	73068191	0.654672	1	#NUM!	1	1	1	1	1	1	1	1	1	1	1	1	1	1	1	1	#NUM!	1	1	1	1	1	1	#NUM!	1	1	1	1	1	1	1	1	1	1	1	0.486366	#NUM!
3.51528	0.750795	13.9743	0.000482669	0.0125545	Gm4779	102634296	X	101790053	101794423	#NUM!	#NUM!	1	1	1	1	#NUM!	1	0.746864	1	#NUM!	1	1	1	1	1	#NUM!	1	1	1	1	#NUM!	#NUM!	1	1	1	1	1	0.956276	0.936741	1	1	1	1	1	1	#NUM!	#NUM!	1	#NUM!
3.52136	0.160561	10.7914	0.0017577	0.0420814	Gm14597	71159	X	53577087	53608979	#NUM!	1	#NUM!	1	1	#NUM!	1	1	1	#NUM!	#NUM!	1	#NUM!	1	1	1	1	#NUM!	1	#NUM!	#NUM!	1	1	1	#NUM!	#NUM!	#NUM!	#NUM!	0.838899	0.863877	1	1	1	1	1	1	1	0	#NUM!	1
3.52163	2.80109	34.5367	8.58803e-08	3.17546e-06	Magee1	107528	X	105120378	105123927	0.713322	0.795109	1	1	0.843645	0.913979	1	1	0.947901	0.662869	0.97929	1	0.961165	0.63662	1	1	0.878575	1	1	1	0.957942	0.794994	1	1	1	0.959333	1	1	0.781216	0.562243	1	1	0.877729	0.946348	1	0.94318	0.636581	0.703305	1	1
3.52587	0.997004	32.6044	2.49942e-07	8.98687e-06	Slc10a3	214601	X	74369217	74373349	1	0.849501	1	1	0.774055	1	1	1	1	1	1	1	1	1	1	1	1	1	1	1	0.721312	1	1	1	1	1	1	1	0.838899	1	1	1	1	0.870871	1	1	0.791822	0.68871	1	1
3.52802	7.39301	21.0671	1.57381e-05	0.000480245	Rbm3	19652	X	8138975	8145880	0.672162	0.716246	0.993812	0.996183	0.780801	0.775799	0.992806	0.997501	0.726957	0.648298	0.995958	0.989074	0.743744	0.872915	0.998822	1	0.836239	0.779428	1	0.99447	0.812393	0.747757	0.997673	0.998796	0.590823	0.624831	1	0.998668	0.66704	0.611923	0.996397	0.994292	0.644395	0.65997	0.996258	0.998696	0.730609	0.827735	0.998786	0.995247
3.53024	0.128037	14.0383	0.000462449	0.0120768	Tmsb15b2	100034363	X	136955265	136975497	1	1	1	#NUM!	#NUM!	1	1	1	#NUM!	1	1	1	1	#NUM!	1	1	1	#NUM!	1	1	1	1	1	1	#NUM!	1	#NUM!	#NUM!	1	#NUM!	1	#NUM!	1	0.509218	1	#NUM!	1	1	1	1
3.53123	5.13913	37.4238	3.06449e-08	1.17073e-06	9530027J09Rik	100500713	X	48276792	48285426	0.79357	0.829938	1	1	0.774055	0.838516	1	0.990796	0.865419	0.722083	1	1	0.888947	0.900559	1	1	0.799018	0.827091	0.99473	1	0.855579	0.810091	1	1	0.751086	0.774921	1	1	0.78537	0.762003	1	1	0.843656	0.85777	1	0.993573	0.749082	0.782756	1	1
3.53465	3.05846	29.0557	6.57085e-07	2.27077e-05	Zc4h2	245522	X	95639193	95658509	0.853916	0.786537	1	1	0.798558	0.869851	1	1	0.910415	0.514732	1	1	0.958885	0.611236	1	1	0.81278	0.82316	1	1	0.780991	0.828351	1	1	0.797589	0.921845	1	1	0.558426	0.514025	1	1	0.955626	0.815145	1	1	0.642363	0.61714	1	1
3.56441	6.59006	26.0663	2.09005e-06	6.894e-05	Ercc6l	236930	X	102141716	102157091	0.797857	0.786667	1	0.991721	0.789532	0.75777	0.997723	0.997929	0.833924	0.718304	1	1	0.846865	0.789299	0.998159	1	0.76892	0.780492	0.998146	1	0.722467	0.78414	0.994085	1	0.809758	0.808996	0.99764	1	0.735498	0.801576	1	0.997084	0.848993	0.830752	1	0.995409	0.788711	0.759025	1	1
3.5658	6.83462	23.571	5.64698e-06	0.000180187	Kdm5c	20591	X	152233020	152274535	0.737356	0.756638	1	0.998194	0.776404	0.758899	0.996154	0.993489	0.761466	0.715884	1	0.993012	0.825012	0.689483	0.998109	1	0.818767	0.75299	0.997786	1	0.713977	0.766186	0.99809	0.99839	0.728549	0.734256	1	0.998094	0.694198	0.667783	0.998188	1	0.746997	0.721527	0.99572	0.996212	0.685679	0.690426	0.994091	0.998065
3.59365	2.99865	25.1491	3.17154e-06	0.000102878	Xlr	22441	X	53777118	53797706	1	1	1	1	0.822219	1	1	1	1	1	1	0.848411	1	0.653584	1	1	1	1	1	1	1	0.805312	1	1	0.971627	1	0.945104	1	0.947631	0.941078	0.936652	0.993108	0.915636	0.979257	0.9914	0.974157	1	0.654741	1	1
3.60224	0.522513	15.9104	0.000166306	0.00456875	Bex4	406217	X	136138996	136140443	0	0.319904	1	1	1	1	1	1	1	#NUM!	1	1	#NUM!	1	1	1	#NUM!	#NUM!	1	1	1	1	1	1	1	0.849887	1	1	1	#NUM!	1	#NUM!	0.506298	0.509218	1	#NUM!	0.791822	0.321617	1	1
3.61102	1.49953	24.7138	4.51795e-06	0.000144871	Rhox4f	636177	X	37602894	37607704	0	0.79005	0.654228	1	1	1	0.953962	1	1	0.140783	1	1	0.487683	1	0.488811	0.793234	1	1	1	1	1	1	1	1	#NUM!	1	0.484939	1	1	1	1	1	1	1	1	1	0.487414	0.274982	1	0.90492
3.6123	0.10578	12.2611	0.00103572	0.0256115	Gm650		X	155304199	155305749	1	1	1	#NUM!	1	#NUM!	1	#NUM!	#NUM!	#NUM!	1	1	1	1	1	#NUM!	1	#NUM!	#NUM!	#NUM!	1	#NUM!	1	#NUM!	1	1	1	1	0.722503	0.613388	1	1	1	1	1	1	1	#NUM!	#NUM!	1
3.61922	0.15728	16.1195	0.00018725	0.00512972	AA414768	245350	X	12936872	12938128	1	1	1	1	1	#NUM!	1	#NUM!	1	1	1	1	1	1	1	1	#NUM!	1	1	#NUM!	1	1	1	1	1	1	1	1	0.862045	1	1	1	1	1	1	1	1	1	0	1
3.62497	1.30873	35.7039	6.20488e-08	2.32505e-06	Gpr173	70771	X	152343598	152368704	0.919191	0.79005	1	1	0.804344	0.860518	1	1	0.907705	1	1	1	1	0.622765	1	1	1	1	1	1	1	0.837939	1	1	0.924223	0.894653	1	1	0.708461	0.71165	1	1	0.804	0.805835	1	1	0.791822	0.654741	1	1
3.64062	8.50342	14.3079	0.000293259	0.00781491	Eif2s3x	26905	X	94188707	94212862	0.405024	0.377755	0.995015	0.995168	0.872041	0.873253	0.9987	0.998232	0.434051	0.33787	0.99715	0.994229	0.500318	0.389683	0.995204	0.995774	0.87867	0.874105	1	1	0.880452	0.873767	0.999167	0.998852	0.406622	0.39725	0.992403	0.998052	0.867758	0.871863	0.999488	0.999474	0.88181	0.862394	0.999514	0.999147	0.380735	0.334172	0.991288	0.998584
3.64793	8.51907	13.1415	0.000499055	0.0129292	Ogt	108155	X	101640060	101684351	0.573413	0.581482	0.999322	0.998646	0.622055	0.630965	0.996449	0.998539	0.592307	0.572983	1	0.997253	0.691105	0.579638	0.997366	0.998012	0.621008	0.603855	0.999329	0.999434	0.593203	0.615362	0.996466	0.999507	0.595508	0.588332	0.996509	0.996933	0.60786	0.616631	0.995897	0.999282	0.606415	0.634532	1	0.995839	0.578646	0.54613	0.996137	0.994787
3.65054	5.15655	25.7981	2.32274e-06	7.63718e-05	Amer1	72345	X	95420318	95444872	0.814266	0.858902	1	1	0.734265	0.847015	1	0.99477	0.751392	0.690399	1	1	0.826376	0.675523	1	1	0.865349	0.849268	1	1	0.785131	0.809033	1	0.988081	0.815451	0.846095	0.992576	1	0.611681	0.470574	1	1	0.64862	0.84855	1	1	0.630521	0.568633	1	1
3.67186	0.868047	29.6245	6.12871e-07	2.12173e-05	Gm9085		X	20382750	20383821	1	0.767044	1	1	1	1	1	1	1	0.797259	1	1	1	1	1	1	1	1	1	1	0.861338	0.8612	1	1	1	1	1	1	0.892838	0	1	1	0.8602	1	1	1	1	0.895109	1	1
3.67996	6.35679	28.3976	8.4515e-07	2.88502e-05	Kdm6a	22289	X	18162575	18279936	0.752782	0.795988	0.997358	0.996788	0.797878	0.848304	1	1	0.838071	0.754432	1	0.994927	0.851579	0.895265	0.997528	1	0.833804	0.862163	1	1	0.842634	0.788577	1	0.995738	0.621312	0.654858	1	0.997761	0.583404	0.560087	0.990434	1	0.63217	0.603087	1	1	0.856214	0.83109	1	0.995258
3.68182	4.07982	28.8006	7.24275e-07	2.48977e-05	Usp11	236733	X	20703906	20720539	0.869029	0.676436	1	1	0.826871	0.930396	0.992398	0.990427	0.818433	0.516213	1	1	0.90905	0.653584	0.9866	1	0.90608	0.761916	0.987067	1	0.861338	0.840171	1	1	0.704281	0.673072	1	1	0.768837	0.67104	1	1	0.916239	0.861599	1	1	0.492567	0.469876	1	1
3.69378	1.29663	35.0153	1.00508e-07	3.70234e-06	Stk26	70415	X	50841047	50893097	1	0.838035	1	0.904142	0.790288	0.954707	1	1	1	0.815633	0.828332	1	1	0.738907	1	1	1	1	1	1	0.903079	1	1	1	#NUM!	1	1	1	1	0.808827	1	1	1	1	1	1	0.930131	0.694717	1	1
3.70557	0.321118	17.519	0.000106985	0.00301533	Rhox7-ps2		X	37676370	37679555	1	1	1	1	#NUM!	1	1	1	1	1	#NUM!	1	#NUM!	#NUM!	1	1	1	1	#NUM!	1	#NUM!	1	1	#NUM!	1	1	1	1	1	0.679017	1	1	0.754694	1	1	1	1	1	#NUM!	1
3.70717	0.653206	17.9473	6.77381e-05	0.00195039	Rhox4c	434759	X	37480337	37485124	#NUM!	1	1	0.79048	1	1	1	1	0	0.329557	0.562693	0.744902	0.791999	0.653584	1	0.589936	1	1	1	1	1	1	1	1	0.824284	1	0.738532	0.824874	1	1	1	#NUM!	1	1	#NUM!	1	1	0.486703	1	0
3.70821	1.97762	22.0435	1.05169e-05	0.000326525	Zdhhc15	108672	X	104536969	104671064	1	0.915389	1	1	0.687728	0.942699	1	1	1	0.738659	0.885325	1	1	0.653584	1	1	0.861148	0.50452	1	#NUM!	1	0.911825	1	1	0.652344	1	1	1	0.510154	0.465544	1	1	0.672241	0.823603	1	1	0.432049	0.597025	1	1
3.7349	-0.0834427	12.0477	0.00111765	0.0274985	Gm25047		X	36363899	36364002	1	1	1	#NUM!	1	#NUM!	#NUM!	1	#NUM!	#NUM!	1	1	#NUM!	#NUM!	1	#NUM!	1	#NUM!	#NUM!	#NUM!	#NUM!	#NUM!	#NUM!	#NUM!	1	1	1	#NUM!	1	1	1	1	#NUM!	0	#NUM!	#NUM!	1	1	#NUM!	#NUM!
3.7558	1.09111	15.7845	0.000166087	0.00456875	Uprt	331487	X	104482818	104507490	0.791301	0.319904	1	1	1	1	1	1	1	0.830953	1	1	#NUM!	0.105481	1	1	1	#NUM!	#NUM!	1	1	0.72108	1	0.935767	1	1	#NUM!	#NUM!	0.708461	0.149867	1	1	1	1	1	#NUM!	0.487414	0.280798	1	1
3.79686	4.196	29.4129	5.73565e-07	1.99271e-05	Gpc3	14734	X	52272426	52613950	0.728682	0.841654	1	1	0.851325	0.945887	0.96629	1	0.845943	0.65955	1	1	0.755724	0.386089	1	1	0.926805	0.84028	0.959123	1	0.930455	0.847753	1	1	0.632358	0.59723	1	1	0.685297	0.514025	1	1	0.614679	0.813355	1	1	0.492907	0.622947	1	1
3.81147	4.01018	51.54	2.83145e-10	1.23074e-08	Tbc1d25	209815	X	8154472	8176181	0.830197	0.873758	1	0.982916	0.840076	0.913615	0.989389	1	0.818592	0.849688	0.990228	0.979866	0.890005	0.946263	1	1	0.949875	0.950852	1	1	0.767124	0.914064	1	1	0.8094	0.775089	0.988463	1	0.794588	0.760373	1	1	0.838604	0.84855	1	1	0.836362	0.898475	1	1
3.84163	0.00774589	11.8413	0.00127483	0.0311696	Rhox4a	664609	X	37265338	37270132	#NUM!	#NUM!	#NUM!	#NUM!	1	1	1	1	#NUM!	#NUM!	#NUM!	#NUM!	#NUM!	#NUM!	#NUM!	#NUM!	1	#NUM!	1	1	1	1	1	1	1	#NUM!	#NUM!	#NUM!	#NUM!	1	1	#NUM!	#NUM!	#NUM!	1	0.509195	#NUM!	#NUM!	#NUM!	#NUM!
3.84665	1.44975	35.1723	6.82877e-08	2.5442e-06	Spin4	270624	X	95022510	95026682	1	0.775253	1	1	0.911328	0.755183	1	1	0.898491	0.735831	1	1	1	0.889117	1	1	0.823053	1	1	1	1	0.805312	1	1	0.808499	0.790551	1	1	0.302621	0.319773	1	1	1	0.861599	1	1	0.791822	0.739892	1	1
3.85684	0.246569	14.969	0.000363217	0.00962672	Map7d2	78283	X	159414572	159498757	1	1	1	#NUM!	1	1	1	1	1	1	1	1	#NUM!	1	1	1	#NUM!	1	1	#NUM!	#NUM!	1	1	1	1	1	1	1	#NUM!	#NUM!	1	1	1	1	1	1	1	1	1	1
3.86663	2.70517	28.2662	8.88912e-07	3.02911e-05	Tspan6	56496	X	133891068	133898429	0.883493	0.638196	1	1	0.972179	0.891609	1	1	0.907705	0.595903	1	1	0.791999	0.594721	1	1	0.969736	0.957268	1	1	0.838096	0.88579	1	1	0.824284	1	1	1	0.59519	0.552373	1	1	0.90908	0.888326	1	1	0.580382	0.366867	1	1
3.87907	3.30282	51.2226	3.12766e-10	1.34455e-08	Pls3	102866	X	75785654	75875182	0.9087	0.879386	1	1	0.775634	0.905632	1	1	0.921886	0.905529	1	0.9837	0.914596	0.894628	1	1	0.976385	0.924351	1	1	0.885906	0.928194	1	1	0.941001	0.838445	1	0.971358	0.815026	0.727182	1	1	0.873772	0.974613	1	1	0.85941	0.798596	1	1
3.88844	2.18272	41.2278	8.20518e-09	3.22924e-07	Ap1s2	108012	X	163909017	163933666	0.93429	0.909377	1	1	0.827473	0.971373	1	1	0.936517	0.632411	1	1	1	0.849852	1	1	0.534559	0.629228	1	1	0.828514	0.902978	1	1	0.951696	0.767583	1	1	0.728116	0.596905	1	1	0.705263	0.861599	1	1	0.676581	0.879073	1	1
3.89098	2.20503	27.8772	1.30214e-06	4.36127e-05	Xlr5c	27084	X	73282896	73292976	1	1	1	0.738877	1	0.902478	0.915816	1	1	0.329557	1	1	1	0	1	1	1	0.966114	1	1	1	0.973114	0.955682	1	1	1	1	1	0.862045	1	1	1	1	1	1	1	#NUM!	1	1	1
3.89168	3.81711	52.3006	2.23304e-10	9.77142e-09	Klf8	245671	X	153237466	153396132	0.888944	0.84734	1	1	0.886125	0.886551	1	0.967517	0.977904	0.86762	1	0.988836	0.952359	0.904155	1	1	1	0.928046	1	1	0.976984	0.906722	1	1	0.890484	0.894653	1	1	0.857495	0.79501	1	1	0.74764	0.823603	1	1	0.896407	0.844	1	1
3.89749	3.2334	41.6382	7.13638e-09	2.83139e-07	Tspyl2	52808	X	152336852	152342425	0.802993	0.870462	1	1	0.829985	0.929128	1	1	0.915385	0.653293	1	1	0.916297	0.687613	1	1	0.945138	0.946863	1	1	0.848947	0.884425	1	1	0.882431	0.873734	1	1	0.703459	0.692085	1	1	0.963851	0.95803	1	1	0.7185	0.628287	1	1
3.90209	0.187591	13.5827	0.000559143	0.0143528	Awat2	245532	X	100402221	100442717	1	1	1	1	#NUM!	1	#NUM!	1	#NUM!	1	1	#NUM!	1	1	1	1	#NUM!	1	1	1	1	#NUM!	1	1	0.652344	1	1	1	1	1	#NUM!	1	1	1	1	1	1	1	1	1
3.90974	0.308165	25.2342	4.41681e-06	0.00014186	Rragb	245670	X	153139981	153171943	1	0.767044	1	1	1	1	1	1	1	0.49574	1	1	#NUM!	#NUM!	1	1	1	#NUM!	1	#NUM!	1	1	#NUM!	1	#NUM!	1	1	#NUM!	0.675632	#NUM!	1	1	1	1	#NUM!	#NUM!	0.487414	0.739892	1	1
3.91861	6.4071	35.4878	6.09758e-08	2.28923e-06	Utp14a	72554	X	48256862	48282453	0.845049	0.877061	1	0.995537	0.791744	0.841633	0.99737	1	0.877986	0.760801	1	1	0.879991	0.862622	1	1	0.811399	0.799073	0.997946	1	0.816408	0.800522	0.993938	0.99569	0.827983	0.809598	0.997435	1	0.760038	0.73826	0.993033	1	0.815243	0.820548	0.996656	0.99192	0.812262	0.793954	1	0.995148
3.95064	0.231024	15.5811	0.000212152	0.00573955	Gm14817		X	73795215	73797616	1	1	#NUM!	1	1	1	1	1	1	1	#NUM!	1	1	#NUM!	1	1	1	1	1	1	0	1	1	1	0.319311	#NUM!	1	1	0.675632	1	#NUM!	#NUM!	1	1	#NUM!	#NUM!	1	1	1	1
3.96218	-0.00217492	16.3745	0.000160172	0.00441884	Arr3	170735	X	100605497	100618493	#NUM!	#NUM!	1	1	1	1	1	1	#NUM!	1	#NUM!	1	1	#NUM!	#NUM!	#NUM!	1	1	1	1	#NUM!	1	1	1	#NUM!	#NUM!	#NUM!	#NUM!	1	0.760373	1	1	1	#NUM!	1	1	#NUM!	0.486703	1	#NUM!
3.96443	2.68494	38.9339	1.80671e-08	6.98403e-07	Cdkl5	382253	X	160771923	160994704	0.843049	0.775253	1	0.962216	0.963927	1	1	1	1	0.756878	1	1	1	0.825076	1	1	0.728813	0.966689	1	1	0.966654	1	1	1	0.92143	0.949678	0.838144	1	0.903597	0.679017	1	1	0.980089	1	1	1	0.889899	0.8391	1	1
3.98192	2.81669	44.2482	3.38621e-09	1.36848e-07	Taf9b	407786	X	106206883	106221158	0.92494	0.900931	1	1	0.816635	0.843706	1	1	1	0.784366	1	1	0.961165	0.790506	1	1	1	1	1	1	0.892269	0.8612	1	1	0.96676	0.927213	1	1	0.793959	0.603248	1	1	1	1	1	1	0.898734	0.7613	1	1
4.00087	0.535406	25.7928	2.79389e-06	9.09291e-05	Gm14537		X	20391709	20392501	0.654672	1	1	1	1	1	1	1	1	1	1	1	1	1	1	1	0	1	1	1	1	1	1	1	0.824284	0.738959	1	1	0.675632	0.760373	1	#NUM!	1	1	1	1	1	0.486703	1	1
4.00406	-0.0299148	14.2567	0.000403033	0.0106244	Gm21986		X	101295839	101321348	1	1	1	1	1	1	1	#NUM!	1	1	1	#NUM!	1	1	1	#NUM!	1	#NUM!	#NUM!	#NUM!	#NUM!	1	#NUM!	1	0.484058	1	#NUM!	#NUM!	0	0.679017	#NUM!	#NUM!	#NUM!	1	1	#NUM!	#NUM!	1	#NUM!	#NUM!
4.02742	1.92624	46.1701	1.81298e-09	7.49724e-08	Srpk3	56504	X	73774405	73778925	1	1	1	1	0.915193	0.841584	1	1	1	0.643157	1	1	1	1	1	1	1	0.725835	1	1	0.838096	0.706995	1	1	1	1	1	1	0.903597	0.679017	1	1	0.921835	1	1	1	0.930131	1	1	1
4.02748	1.05987	45.66	2.88193e-09	1.1793e-07	3110067C02Rik		X	150463726	150466156	0.839059	1	1	1	1	1	1	1	1	1	1	1	1	0.868481	1	1	1	1	1	1	0.579902	1	1	1	1	1	1	1	1	0.514025	1	1	1	0.75685	1	1	0.904843	1	1	1
4.02957	4.8983	60.2536	2.02168e-11	9.41523e-10	Mbtps2	270669	X	157535371	157598715	0.918746	0.906335	1	1	0.896507	0.768873	1	0.990232	0.938748	0.901952	1	1	0.969329	0.900142	1	1	0.875601	0.909196	1	0.992109	0.918902	0.904985	1	1	0.94273	0.898439	1	1	0.835589	0.881999	1	1	0.868876	0.882451	1	1	0.911159	0.865432	1	1
4.05339	3.28227	94.1572	2.78316e-15	1.87074e-13	Pim2	18715	X	7878262	7883432	0.830436	0.922578	0.935509	1	0.94033	0.930396	0.981426	1	0.895892	0.751215	1	0.941385	0.912824	0.917249	0.936795	0.978297	0.983311	1	1	0.954803	0.957942	0.954953	0.96751	0.98449	0.829398	0.929629	1	0.979211	0.874104	0.956919	1	1	0.889991	0.973926	1	1	0.880517	0.857249	0.977557	1
4.05398	0.133263	15.6304	0.000204901	0.00555876	Gm15384		X	75551117	75551824	#NUM!	1	1	#NUM!	1	1	1	1	1	1	1	1	1	1	1	1	1	#NUM!	#NUM!	#NUM!	1	1	1	#NUM!	1	1	#NUM!	0.738637	0.510154	#NUM!	1	1	#NUM!	1	1	1	#NUM!	0.654741	#NUM!	#NUM!
4.05494	1.21307	19.6292	3.23163e-05	0.000963577	Xlr5b	627081	X	73148796	73158872	0.92494	1	0.883291	1	1	#NUM!	1	1	0.932289	0.915356	0.920512	1	1	0.889117	0.950309	1	1	1	#NUM!	#NUM!	#NUM!	1	1	1	0.867854	0.959333	0.962151	0.878379	0.675632	1	1	1	1	1	1	1	1	0.857249	0.954196	1
4.07112	2.02672	74.6385	8.5836e-13	4.4067e-11	Ribc1	66611	X	152004582	152016295	0.88959	0.824678	1	1	1	0.961055	0.898027	1	0.907705	1	1	1	1	0.882997	1	1	1	1	1	1	1	1	1	1	1	1	1	1	1	0.899906	1	1	0.960956	1	1	1	1	0.825812	1	1
4.07381	0.836681	31.2909	2.8286e-07	1.01332e-05	Slc16a2	20502	X	103697414	103821983	1	0.701662	1	1	1	1	1	1	0.662955	0.49574	1	1	1	0.158724	1	1	1	0.753375	1	1	1	0.850469	1	1	0.73785	1	#NUM!	#NUM!	0.776363	0.840982	1	1	1	0.509218	1	1	0.74044	0.68871	1	1
4.08346	2.12955	43.7838	3.94401e-09	1.58734e-07	Zc3h12b	547176	X	95711678	95932637	0.962397	0.753541	1	1	0.816635	0.92503	1	1	0.95162	0.843922	1	0.939663	0.94337	0.954031	0.942048	1	1	1	1	1	1	0.878622	1	1	1	0.887176	1	1	0.675632	0.760373	1	1	0.789925	1	1	1	0.891788	0.465004	1	1
4.08523	2.51219	45.639	1.8771e-09	7.74599e-08	Arxes1	76219	X	136033367	136034946	0.703242	1	1	1	0.90855	1	1	0.926151	0.95162	0.605694	1	1	1	0.882997	1	1	1	0.907775	1	1	0.833443	0.949016	1	1	0.959109	0.868512	0.951858	1	0.834943	0.808827	1	1	1	0.925655	1	1	0.624634	0.577989	0.939846	1
4.09103	2.75951	50.7221	4.29345e-10	1.82565e-08	Prrg1	546336	X	78449613	78583896	0.944636	0.652961	1	1	0.921992	0.891609	1	1	0.915385	0.898456	1	1	1	0.868481	1	1	1	1	1	1	0.748521	0.922434	1	1	0.97525	0.934011	1	1	0.872994	0.985443	1	1	0.960956	0.921624	1	1	0.552805	0.716594	0.934226	1
4.09265	2.75577	92.0836	4.54947e-15	3.00718e-13	Prdx4	53381	X	155323918	155340754	0.949895	0.885861	1	1	0.926877	0.940959	1	0.909931	0.941953	1	0.948282	1	1	1	0.962712	0.866201	1	0.971926	0.887732	0.927961	0.966654	1	0.976233	1	1	0.963532	0.967875	1	0.937893	0.863877	1	1	0.955626	0.907892	1	0.961389	0.836996	0.83272	0.976029	1
4.09538	1.70425	54.3467	3.43784e-10	1.46821e-08	Mdrl	69591	X	36814771	36817185	0.850465	0.714994	1	1	1	1	0.961339	1	1	0.615021	1	1	1	0.868481	1	1	1	1	1	1	1	1	1	1	1	1	1	1	1	1	1	1	1	1	1	1	0.839484	0.850504	1	1
4.10021	1.38704	26.3595	3.65834e-06	0.000118081	1600025M17Rik	72030	X	56317608	56320664	1	#NUM!	1	1	0.755098	1	1	1	1	0.855043	0.794246	1	1	1	1	#NUM!	1	1	1	1	1	1	1	1	1	1	1	1	1	0.936741	1	1	1	1	1	1	1	1	1	1
4.10416	1.06062	20.548	2.81365e-05	0.000842802	Gm14636		X	19156981	19167241	1	0.484738	1	1	1	1	1	1	1	0	1	1	1	#NUM!	1	1	1	1	1	1	1	1	1	1	#NUM!	#NUM!	#NUM!	1	1	1	1	1	1	1	1	1	0.74044	#NUM!	1	1
4.10729	3.56234	49.5465	5.31126e-10	2.24866e-08	Slc35a2	22232	X	7884028	7894492	0.929926	0.839779	1	1	0.837101	0.883841	0.979877	1	0.880613	0.836391	1	1	0.799227	0.7939	1	1	0.971518	1	1	1	0.783716	0.944104	1	0.980765	0.696078	0.750658	1	1	0.689916	0.705343	1	1	0.787268	0.74393	0.98446	1	0.901004	0.766739	1	0.981255
4.12542	4.99424	44.3195	2.90151e-09	1.18483e-07	Fndc3c1	333564	X	106420041	106485401	0.866262	0.804986	1	1	0.897288	0.956723	0.995671	0.995166	0.861115	0.775738	1	0.988588	0.899477	0.820853	1	1	0.989247	0.94217	1	1	0.908896	0.91474	0.994874	1	0.849152	0.873734	1	0.986905	0.575988	0.528852	1	1	0.842088	0.863558	1	1	0.698596	0.585476	1	1
4.12663	0.535575	18.5036	8.00514e-05	0.00228585	Gm26593		X	21360865	21364622	1	1	#NUM!	1	1	1	1	1	1	0	1	1	1	1	1	1	1	1	1	1	#NUM!	1	1	1	1	1	1	1	0.609708	1	1	#NUM!	1	1	1	1	1	1	1	1
4.15765	1.05314	33.5409	2.36426e-07	8.53836e-06	Rhox4e	194856	X	37557412	37562283	1	1	0.825486	0.904142	#NUM!	1	1	1	1	1	1	1	1	1	1	1	1	1	1	#NUM!	1	1	1	1	1	1	1	1	0.609708	1	1	1	1	1	1	1	1	0.825812	1	1
4.16155	0.850128	25.2161	4.99128e-06	0.000159525	Gm15049		X	142775885	142776347	1	0.79005	1	1	1	1	1	#NUM!	1	0.688666	1	1	1	0.738907	1	1	1	1	1	1	#NUM!	1	1	1	1	1	1	1	0.409788	0.319773	1	1	1	1	1	1	1	1	1	1
4.16891	2.17402	35.3469	7.04161e-08	2.61852e-06	Ophn1	94190	X	98554277	98891025	0.904571	0.767044	1	1	1	1	1	1	0.880613	0.696409	1	1	1	0.889117	1	1	1	1	1	1	1	0.909768	1	0.965631	1	1	1	1	0.634471	0.383548	0.965105	1	1	0.930979	1	1	0.791822	0.654741	1	1
4.1697	0.701302	32.5227	4.5369e-07	1.58468e-05	Nudt10	102954	X	6168696	6173015	0.825769	0.882713	1	1	1	1	1	1	0.855091	0.595903	1	1	1	0.653584	1	1	1	1	1	1	1	1	1	1	#NUM!	1	1	1	1	1	#NUM!	1	1	1	1	#NUM!	1	1	1	1
4.17448	5.40433	44.1092	3.11147e-09	1.26529e-07	Nkap	67050	X	37126795	37150746	0.850465	0.87983	1	1	0.827935	0.917622	1	0.995142	0.848069	0.851742	1	1	0.874198	0.874903	1	1	0.853558	0.766885	0.995976	1	0.827312	0.787017	1	0.991922	0.767575	0.821545	1	1	0.763629	0.710785	1	0.991179	0.821899	0.783629	1	1	0.862448	0.77112	1	1
4.17885	3.57203	45.9428	1.69913e-09	7.05626e-08	Nhs	195727	X	161833296	162159730	0.825769	0.906727	1	1	0.869799	0.868085	1	1	0.86473	0.828922	1	0.991332	0.931341	0.894628	1	1	1	0.888172	1	1	0.810268	0.873322	1	1	0.851775	0.948033	1	1	0.813071	0.666901	1	1	1	0.900781	1	1	0.819597	0.69147	1	1
4.19747	2.25799	45.8821	1.73327e-09	7.18277e-08	Prps1	19139	X	140456613	140476140	0.915972	0.906727	0.941461	0.937855	0.918734	1	1	1	0.950441	0.329557	0.958611	0.733889	0.925233	0.849852	1	1	0.942982	1	0.922245	1	0.844607	0.892158	0.924938	1	1	0.883025	0.933875	1	0.426572	0.345917	1	0.955566	1	0.949177	0.805985	1	0.768953	0.69147	0.964863	0.831907
4.19905	0.65585	28.7018	1.01339e-06	3.43535e-05	Ppp1r3f	54646	X	7557296	7574283	1	0.738376	1	1	1	1	1	1	#NUM!	1	1	1	1	0.849852	1	1	1	1	1	1	#NUM!	1	1	1	1	1	1	1	0.862045	0.413539	1	1	0.918571	1	1	1	0.487414	0.791352	1	1
4.2013	0.557811	22.0533	1.43809e-05	0.000440203	Tceal1	237052	X	136707982	136711478	0.850465	1	1	1	#NUM!	#NUM!	1	#NUM!	1	1	1	1	1	#NUM!	1	1	1	1	1	#NUM!	1	1	1	1	1	0.825115	1	#NUM!	1	1	1	1	1	#NUM!	1	1	1	1	1	1
4.20254	2.02687	69.5798	1.83463e-12	9.10796e-11	Nxt2	237082	X	142226770	142239692	0.883493	0.899368	1	1	0.907095	1	1	1	0.946532	1	1	1	1	0.953012	1	1	1	1	1	1	1	0.878622	1	1	1	0.941319	1	1	0.879376	0.881009	1	1	1	0.95803	1	1	0.916215	0.954255	1	1
4.20536	3.37985	60.576	1.83951e-11	8.62851e-10	Gripap1	54645	X	7789765	7820567	0.906681	0.798028	1	1	0.891564	1	1	1	1	0.703122	0.964917	1	0.965042	0.928019	1	0.973295	1	1	0.969672	1	0.867063	0.973114	1	1	0.907844	0.890291	1	1	0.821816	0.818819	1	1	0.933778	0.978078	1	1	0.939509	0.726397	1	1
4.21042	8.30699	22.5152	8.6693e-06	0.000270018	Flna	192176	X	74223461	74249820	0.728821	0.73102	0.996535	0.998774	0.766479	0.830779	0.994957	0.997071	0.828828	0.635406	0.997657	0.996323	0.858164	0.643299	0.997485	0.996285	0.907864	0.904438	0.995842	0.998441	0.769998	0.878933	0.999421	0.997347	0.791839	0.802247	0.998284	0.998861	0.700859	0.517929	0.997697	0.999666	0.913019	0.850034	0.997935	0.998381	0.550908	0.552081	0.998383	0.998024
4.21161	3.30797	57.177	6.07965e-11	2.74005e-09	Timp1	21857	X	20870166	20874735	0.896791	0.777494	1	1	0.918734	0.96026	1	1	0.943564	0.487805	1	1	0.950096	0.796258	1	1	1	1	1	1	0.951622	0.936451	1	1	0.970447	0.966944	1	1	0.829356	0.798648	1	1	1	1	1	1	0.791822	0.782756	0.975472	1
4.2127	5.50735	54.6261	1.08985e-10	4.82297e-09	Atp7a	11977	X	106027276	106124926	0.913619	0.868728	0.984582	1	0.857456	0.910858	0.995632	1	0.98452	0.808282	1	1	0.976577	0.840553	1	1	0.961509	0.969672	0.994051	1	0.951351	0.896023	0.994847	0.992401	0.981852	0.980665	1	0.99353	0.798937	0.710436	0.996758	1	0.967827	0.909336	1	0.994491	0.817611	0.757661	0.996347	1
4.23484	5.29825	63.1857	8.63514e-12	4.11959e-10	Zrsr2	22184	X	163935443	163958661	0.941025	0.913082	1	1	0.875168	0.856896	0.994577	0.978597	0.947901	0.786627	1	0.978269	0.942334	0.915601	1	1	0.857857	0.940156	0.984602	1	0.863457	0.874181	0.995295	0.987349	0.859783	0.894653	0.981387	1	0.767331	0.762449	1	1	0.858987	0.843495	0.990121	0.994261	0.92665	0.794329	1	1
4.26587	2.1228	16.7507	9.89817e-05	0.00280999	Gpr50	14765	X	71663667	71669257	0.703242	1	1	1	0.853457	1	1	1	1	0.921858	1	1	0.704124	0.585926	1	1	0.650419	1	1	#NUM!	0.778762	0.870495	1	1	1	1	1	1	0.342421	0.152569	0.91407	0.988217	#NUM!	0.67481	1	#NUM!	0.532944	0.532235	1	1
4.27143	1.55111	33.366	1.72717e-07	6.31468e-06	Rhox4g	664608	X	37646500	37651327	1	0.484738	1	1	1	1	1	1	1	0.830953	1	0.195714	1	0.894628	1	0.851952	1	1	1	1	0.850616	1	1	1	0.789598	0.485492	0.75369	1	1	1	1	1	1	1	1	1	0.74044	0.510525	0.739633	0.919491
4.27344	4.28227	65.1371	4.95041e-12	2.40871e-10	Rbm41	237073	X	139889511	139998595	0.934966	0.832065	1	1	0.855686	0.967552	0.990345	1	0.978824	0.727403	1	1	0.987197	0.799319	0.987846	1	0.976948	0.960291	1	1	0.951622	0.93889	1	1	0.935268	0.913322	1	1	0.878478	0.827071	1	1	0.972383	0.966337	1	1	0.837416	0.813102	1	1
4.27621	3.5257	52.6317	2.01466e-10	8.85544e-09	Sat1	20229	X	155213132	155216449	0.972278	0.776826	0.981793	1	0.891564	1	1	1	1	0.817989	1	1	1	0.830664	1	1	1	0.984407	1	1	0.955003	0.91567	1	1	1	0.957711	1	1	0.870502	0.793142	1	0.989542	0.945752	0.900415	1	1	0.844568	0.814682	1	1
4.27658	1.08325	45.4248	3.27206e-09	1.32508e-07	Fam50a	108160	X	74313033	74320149	0.850465	1	1	1	0.918734	1	1	1	1	1	1	0.795644	1	0.738907	1	1	1	1	1	1	0.892269	1	1	0.838787	1	1	1	1	1	0.79501	1	1	0.8602	1	1	0.83838	1	1	1	1
4.27841	7.38474	38.7304	1.93926e-08	7.46692e-07	Atrx	22589	X	105797615	105929403	0.876067	0.850442	0.99729	0.998637	0.861784	0.821336	0.997677	0.998739	0.873754	0.739978	0.996144	0.990856	0.957182	0.84541	0.997498	0.997688	0.813944	0.895223	0.997876	1	0.816587	0.869982	1	0.997525	0.908409	0.911404	1	0.997467	0.837636	0.767626	0.992799	0.994575	0.878952	0.875504	0.996561	0.998887	0.820839	0.762405	0.994641	0.998565
4.28688	0.601237	19.1371	6.29707e-05	0.00182475	Gm14984		X	130400957	130402219	#NUM!	#NUM!	1	1	1	1	1	1	1	0.329557	1	1	1	1	1	1	1	1	#NUM!	1	#NUM!	1	1	1	1	1	1	1	1	0.808827	1	1	1	1	1	1	1	1	1	1
4.29654	2.39009	63.5181	9.76227e-12	4.63471e-10	Wdr45	54636	X	7714333	7728206	0.957894	0.775253	0.971475	1	1	0.955738	1	0.949525	0.898491	0.818915	1	1	1	1	1	1	0.91916	0.918038	1	1	1	0.919193	1	1	0.873099	0.929629	1	1	0.970868	0.926968	1	1	0.869551	1	1	1	0.883818	0.83272	1	1
4.29695	2.83193	110.657	1.66321e-16	1.28587e-14	Dynlt3	67117	X	9654267	9663003	0.821559	0.968794	1	1	0.90855	1	0.956058	1	0.953817	0.746791	1	1	1	1	1	1	1	0.974144	1	1	1	1	1	1	1	1	1	1	0.879376	0.834002	1	1	0.955626	1	1	1	0.941743	0.972996	0.96899	0.966162
4.29777	4.70301	59.0214	2.90614e-11	1.33751e-09	Timm17b	21855	X	7899357	7908351	0.882495	0.854907	1	1	0.915925	0.890797	1	1	0.955824	0.784746	1	1	0.969148	0.904872	1	1	0.973349	0.945386	1	1	0.940739	0.951569	1	1	0.76476	0.874903	1	1	0.78024	0.775866	1	0.991837	0.8529	0.809327	0.99007	1	0.856518	0.739892	1	1
4.30067	2.6766	52.3597	2.1924e-10	9.6151e-09	Plxna3	18846	X	74329066	74344689	0.929926	0.818698	1	1	0.889092	1	1	1	0.907705	0.579186	1	0.92928	1	0.825076	1	1	0.972333	0.943824	1	1	0.949071	0.946178	1	1	1	0.868512	1	1	0.849031	0.75137	1	1	0.959328	0.850893	1	1	0.863747	0.528432	1	1
4.31605	1.85401	49.5044	5.38288e-10	2.27406e-08	Gm7340		X	111571699	111574450	0.768392	0.824678	1	1	1	1	1	1	0.927459	0.761626	1	1	0.941801	0.779618	1	1	1	0.83583	1	1	0.892269	0.8612	1	0.879288	1	1	1	1	0.634471	0.585112	1	1	0.945752	1	1	1	0.930131	0.5368	1	1
4.33544	4.73994	65.7341	4.18183e-12	2.03982e-10	Pqbp1	54633	X	7894519	7899269	0.911965	0.890983	1	0.992589	0.894283	0.881151	1	1	0.945578	0.813646	1	1	0.906474	0.936202	1	0.992909	0.945724	0.98335	1	1	0.983892	0.943834	1	0.993084	0.682281	0.788946	1	1	0.810662	0.78995	0.978359	1	0.881233	0.893394	1	1	0.859527	0.81369	0.993402	1
4.34968	3.86568	55.2325	9.05823e-11	4.0268e-09	Pdk3	236900	X	93764607	93832201	0.956144	0.8734	1	1	0.862651	0.930396	1	1	0.955824	0.735831	1	1	0.981258	0.856123	1	1	0.951549	0.890662	1	1	0.778762	0.756235	0.980895	1	0.95571	1	1	1	0.624953	0.628577	1	1	0.958461	0.984932	1	1	0.899029	0.857249	1	1
4.34994	1.67459	63.4591	1.24855e-11	5.91325e-10	Cmc4	105886298	X	75404846	75416584	1	0.929432	1	1	0.907095	0.945887	1	1	1	1	1	1	0.777301	0.605203	1	1	1	1	1	1	0.972376	1	1	1	1	1	1	1	0.851368	0.820899	1	1	1	0.90327	1	1	0.883818	0.810133	1	1
4.35307	7.71397	74.413	3.88462e-13	2.04806e-11	Tceal9	22381	X	136245079	136247139	0.932653	0.900554	0.995405	0.994271	0.867794	0.931416	0.96293	0.972963	0.952881	0.833824	0.99569	0.995786	0.950681	0.894401	0.995387	0.997881	0.915635	0.931372	0.952988	0.964956	0.850349	0.899904	0.964823	0.951079	0.921166	0.949852	0.995185	0.995944	0.777792	0.715226	0.971981	0.965435	0.919703	0.898678	0.967503	0.978928	0.825552	0.734973	0.997167	0.993213
4.35813	7.2625	80.8392	7.28316e-14	4.12924e-12	Rhox9	104384	X	37899097	37901770	0.99718	0.995959	0.992095	0.997427	0.904142	0.904815	0.889463	0.894903	0.992278	0.940273	0.998777	0.992715	1	0.994088	0.994564	0.993112	0.919481	0.904291	0.901781	0.892885	0.919278	0.88627	0.918669	0.896941	0.9885	0.996452	0.994885	0.99932	0.920687	0.906333	0.911457	0.909243	0.892794	0.943692	0.912622	0.919026	0.998137	0.952716	0.99721	1
4.36169	1.57524	22.0468	1.21044e-05	0.000374032	Xlr3d-ps		X	74696047	74704076	1	1	0.486136	0.653549	1	1	1	1	0.495836	0.246818	0	0.459951	0.740647	#NUM!	#NUM!	0.277268	1	1	1	1	1	0.91567	1	0.939791	0.714438	0.585991	0.484939	0.790274	1	1	1	1	1	1	1	1	1	#NUM!	0.739633	#NUM!
4.36201	0.597284	14.5005	0.000437036	0.0114437	Gm648	270599	X	56543874	56549606	1	1	1	1	1	1	#NUM!	#NUM!	#NUM!	1	1	1	1	#NUM!	1	1	1	#NUM!	1	#NUM!	#NUM!	1	1	#NUM!	1	#NUM!	1	1	1	1	1	1	1	1	1	1	1	1	1	1
4.36796	1.87251	55.7936	7.63901e-11	3.41139e-09	Zfp449	78619	X	56346400	56365674	0.89508	0.868166	1	1	1	1	0.959725	1	1	0.918737	1	1	0.777301	0.653584	1	1	0.907576	0.901616	1	1	1	0.733874	1	1	1	1	1	1	0.862045	0.904938	1	1	0.891353	0.75685	1	1	0.912739	0.815664	1	1
4.36831	6.04744	45.2263	2.1499e-09	8.83446e-08	Sh3bgrl	56726	X	109095365	109197873	0.833278	0.79005	0.991514	1	0.939903	0.942923	0.997718	1	0.959678	0.575589	1	0.989131	0.936863	0.762906	1	1	0.956542	0.972932	0.997658	1	0.950615	0.960876	0.997937	0.993655	0.94259	0.913558	1	1	0.842079	0.776997	0.992875	1	0.980357	0.918624	0.99465	0.994803	0.675814	0.663711	1	1
4.37802	3.85562	59.7427	2.34902e-11	1.08879e-09	Cd99l2	171486	X	71420060	71492849	0.921593	0.873855	1	1	0.928314	0.889855	0.984671	1	0.949705	0.843922	1	1	1	0.887945	1	0.988021	0.965408	0.932652	1	1	0.823285	0.987271	1	1	0.941001	0.873734	0.977901	1	0.622496	0.623431	1	1	0.979674	0.861599	1	1	0.830641	0.81503	1	1
4.37808	1.60783	44.9084	3.14393e-09	1.27584e-07	Plp1	18823	X	136822671	136839733	0.825769	0.924414	1	1	1	1	1	0.943572	0.766261	0.643157	1	1	1	0.767535	1	1	1	1	1	1	1	1	1	1	0.933656	1	1	1	0.903597	0.760373	1	1	1	0.946348	1	1	0.487414	0.486703	1	1
4.38817	0.315751	16.3485	0.000139774	0.0038835	Rab39b	67790	X	75572046	75578231	1	1	1	1	1	1	1	1	#NUM!	#NUM!	1	1	#NUM!	0	#NUM!	1	1	#NUM!	1	1	#NUM!	1	1	1	0	0.653645	#NUM!	#NUM!	0.510154	0.345917	1	1	1	0.75685	1	1	0	0.587166	1	#NUM!
4.39265	2.48289	121.476	1.14945e-17	1.05555e-15	Mpp1	17524	X	75109733	75131016	0.932178	0.949534	1	1	0.877964	0.972191	0.971583	1	0.95162	0.956747	1	1	1	0.915601	0.895899	1	0.970654	1	1	1	1	1	1	1	1	1	1	1	0.919718	0.8858	1	1	0.934884	0.939626	1	1	0.961125	1	1	1
4.39351	0.313583	19.2457	4.78663e-05	0.0014058	Pak3	18481	X	143518591	143797796	1	1	#NUM!	1	1	1	1	1	0.855091	0.49574	1	1	1	0	1	1	0.340728	1	1	1	1	1	1	1	1	#NUM!	1	1	#NUM!	#NUM!	#NUM!	1	1	#NUM!	#NUM!	#NUM!	0.655385	1	#NUM!	#NUM!
4.39356	4.23426	71.2342	9.12774e-13	4.63737e-11	Med12	59024	X	101274030	101297465	0.89508	0.821209	1	0.991785	0.926262	0.977883	1	0.991603	0.948167	0.793136	0.980644	1	1	0.866409	1	1	0.966602	0.96448	1	0.980384	0.919278	0.905094	0.989853	0.990931	0.936803	0.968422	1	1	0.858927	0.7074	0.985743	1	0.958899	0.944812	1	1	0.779708	0.660589	0.985032	0.991921
4.3996	3.54055	47.9952	8.72579e-10	3.66259e-08	Usp27x	54651	X	7371276	7375830	0.92494	0.933825	1	1	0.877964	0.908588	1	1	1	0.780036	1	1	0.889176	0.868481	1	0.98397	0.915635	0.907775	0.966531	1	0.825063	0.889698	1	1	0.925977	0.941319	1	1	0.801416	0.582513	1	0.992673	0.898865	0.910042	1	0.973924	0.847255	0.63178	1	1
4.41312	2.64924	60.0039	2.66154e-11	1.23073e-09	Enox2	209224	X	49009707	49288259	1	0.738376	0.965965	1	0.953607	0.959431	1	1	0.887233	1	1	1	0.961165	1	1	1	1	1	1	1	0.941339	0.88579	1	1	1	1	1	0.966891	0.890391	0.849424	1	1	0.936302	0.968873	1	1	0.74044	0.841518	1	1
4.41959	6.78408	40.9226	9.1056e-09	3.56925e-07	Msn	17698	X	96096042	96168552	0.884731	0.80173	1	0.997039	0.856925	0.950517	0.998456	1	0.954126	0.72957	1	0.99758	0.932733	0.779324	0.996376	0.998055	0.949658	0.964093	0.997514	1	0.912258	0.922791	0.994901	0.996279	0.977513	0.935438	0.997635	0.994572	0.763045	0.62792	0.992821	0.997654	0.972176	0.878328	0.997981	0.994346	0.758657	0.663339	0.995897	1
4.42777	4.58115	67.6287	2.45962e-12	1.2149e-10	Siah1b	20438	X	164070705	164076493	0.961007	0.970525	1	1	0.855274	0.895491	0.991887	0.992522	0.984117	0.838616	0.989537	1	1	0.92604	1	0.993142	0.885423	0.838823	1	1	0.852516	0.919193	1	1	0.863884	0.865568	1	1	0.801416	0.787325	0.985524	1	0.835703	0.900415	1	1	0.954379	0.845905	0.991688	1
4.42796	0.86545	39.773	4.42136e-08	1.66953e-06	Gm14685	574404	X	73117047	73129262	1	0.929432	1	1	1	1	1	1	1	1	1	1	1	1	1	1	1	1	1	1	#NUM!	1	1	#NUM!	1	1	1	0.904034	1	1	1	1	1	1	1	1	1	1	1	1
4.42991	0.776813	29.6345	8.16825e-07	2.7932e-05	Mir652	723976	X	142739000	142739097	1	1	1	1	0.860462	1	1	1	0.873167	1	1	1	1	1	1	1	1	1	1	1	1	1	1	1	1	1	1	1	0.609708	0.514025	1	1	#NUM!	0	1	1	1	1	1	1
4.436	3.02843	59.4928	3.08632e-11	1.41378e-09	Ints6l	236790	X	56454857	56507843	0.939905	0.979183	1	1	0.865292	0.927273	1	1	1	0.627605	1	1	1	0.767535	0.975705	1	1	1	1	1	0.971138	0.923457	1	0.981143	1	1	1	1	0.680537	0.649246	1	1	0.93896	0.921624	1	1	0.862045	0.834902	1	1
4.4421	0.967148	26.5859	2.7708e-06	9.03282e-05	Gm14827	100503393	X	94442732	94447727	1	0	1	1	1	1	1	1	1	0.756878	1	1	1	1	1	1	1	1	#NUM!	1	0.341086	#NUM!	1	1	1	1	1	1	1	0.638056	1	1	1	1	1	1	1	1	1	1
4.45984	4.74683	59.1269	2.81692e-11	1.2995e-09	Rtl8a	66158	X	53642488	53643682	0.942367	0.930356	0.995303	0.990189	0.835852	0.864826	1	1	0.970327	0.903741	0.987742	0.970585	0.993091	0.885798	0.993466	0.992909	0.932664	0.97574	1	1	0.901669	0.811633	1	1	0.964938	0.959109	0.973322	0.985166	0.83027	0.773029	1	1	0.890128	0.931425	1	1	0.829443	0.849896	0.973302	1
4.47686	4.78609	96.0773	1.77493e-15	1.22677e-13	Stag2	20843	X	42149317	42277185	0.918497	0.942565	1	0.985184	0.886125	0.917389	0.981062	0.993114	0.943214	0.757446	1	1	0.955203	0.893302	0.992369	1	0.95596	0.978642	1	0.978097	0.941747	0.946917	0.994402	0.995121	0.985106	0.954536	0.993323	0.978653	0.856311	0.791371	1	0.994653	0.982369	0.956119	0.985291	0.984059	0.870335	0.744735	0.993826	0.978867
4.47895	1.88859	62.0402	4.28429e-11	1.93535e-09	Gm14549		X	36814771	36817200	0.850465	0.687021	1	1	1	1	1	1	1	0.595903	1	1	1	1	1	1	1	0.955324	1	1	1	1	1	1	1	1	1	1	1	1	1	1	1	1	1	1	0.826222	0.8391	1	1
4.47943	1.72139	38.7794	2.12282e-08	8.14166e-07	Radx	102871	X	139480367	139554582	1	0.767044	1	1	0.939085	1	1	1	0.873167	0.880572	1	1	1	0.912102	1	1	0.81749	1	1	1	1	1	1	1	0.918423	1	1	1	0.879376	0.679017	1	1	1	1	1	1	0.655385	0.486703	1	1
4.49016	2.11238	81.6015	1.55843e-13	8.53864e-12	Gm14798		X	94028854	94099304	1	0.968794	1	1	0.851971	0.948739	1	1	0.907705	0.625647	1	1	1	1	1	1	1	1	1	1	1	0.846513	0.951244	1	0.90368	1	1	0.908184	1	1	1	1	0.849405	1	0.954068	1	0.959632	0.95218	0.963654	1
4.4969	0.414258	26.9881	2.32317e-06	7.63718e-05	Xlr5a	574438	X	73107635	73292976	1	1	1	1	1	#NUM!	1	#NUM!	1	1	0	1	1	1	1	#NUM!	#NUM!	1	1	1	1	1	#NUM!	1	1	1	1	1	1	0.840982	1	1	1	0.805835	1	1	1	1	1	1
4.4978	4.61101	71.3425	8.86319e-13	4.53833e-11	Dock11	75974	X	35888832	36076562	0.938143	0.879386	1	0.990865	0.887714	0.962912	1	0.984303	0.910038	0.759867	1	1	0.90839	0.872438	0.99303	0.992392	0.976948	0.922562	1	1	0.903955	0.927896	0.992565	0.993416	0.96569	0.921523	1	0.99311	0.828285	0.783396	0.990098	1	0.958899	0.941901	0.989861	1	0.837715	0.784237	1	1
4.50708	0.737914	32.1151	4.52309e-07	1.58268e-05	Zcchc18	66995	X	136993155	136998472	0.791301	1	1	1	1	1	1	1	1	0.710795	1	1	1	1	1	1	1	1	1	#NUM!	1	1	1	1	1	#NUM!	1	1	1	0.904938	1	1	1	1	1	1	1	1	1	1
4.51667	0.373417	16.6128	0.000153491	0.00424051	Tslrn1	75545	X	62510539	62527011	#NUM!	1	1	1	1	1	1	#NUM!	#NUM!	#NUM!	1	#NUM!	#NUM!	1	1	#NUM!	1	1	1	1	1	1	1	1	1	#NUM!	1	1	1	0	1	1	1	0.805835	#NUM!	1	#NUM!	1	1	#NUM!
4.52402	2.68667	36.7802	4.24831e-08	1.61041e-06	Reps2	194590	X	162411954	162643649	0.891483	0.947018	1	1	0.755098	1	1	1	0.880613	0.905529	1	1	0.932445	0.929612	1	1	1	1	1	1	0.579902	1	1	1	1	0.950845	1	1	0.942539	0.987039	1	1	0.884943	0.954026	1	1	0.834057	0.924961	1	1
4.55133	0.944883	36.6339	7.09202e-08	2.63226e-06	Rhox4b	57737	X	37432494	37437279	0.739834	1	1	1	1	1	1	1	0.746864	1	1	1	1	1	1	1	1	1	1	1	1	1	1	1	1	0.541181	1	1	1	1	1	1	1	1	1	1	0.904843	1	1	1
4.56869	0.276503	23.9932	7.81294e-06	0.000245299	Trpc5	22067	X	144381671	144688180	1	1	1	1	1	1	1	1	0.662955	1	1	#NUM!	1	1	1	1	1	1	1	1	#NUM!	1	1	1	0	1	1	1	#NUM!	0.260668	#NUM!	1	1	1	1	#NUM!	1	1	1	1
4.56892	0.469623	22.7815	1.45485e-05	0.00044464	Dcaf12l2	245403	X	44365458	44368342	1	1	1	1	1	1	1	1	1	1	1	1	0.322474	1	1	1	1	1	1	1	1	1	1	1	1	1	1	1	1	1	1	1	#NUM!	#NUM!	#NUM!	#NUM!	0.387978	0.791352	1	1
4.57178	2.11588	14.0858	0.000415211	0.010916	3830403N18Rik	70691	X	56136572	56153498	1	1	#NUM!	1	1	#NUM!	1	1	1	1	1	1	1	1	1	#NUM!	1	1	1	1	1	#NUM!	1	1	0.974045	0.883025	1	1	0.978158	0.982793	1	0.988786	0.888876	0.977033	1	0.991235	1	1	#NUM!	1
4.57851	1.81635	59.2478	3.31389e-11	1.51448e-09	Syn1	20964	X	20860511	20921004	0.89508	0.918627	1	1	0.939085	1	1	1	0.815691	0.893121	0.926175	1	0.588117	1	1	1	1	0.792463	1	1	1	1	1	1	1	1	1	1	0.64098	0.826381	1	1	0.95351	0.939626	1	1	0.925159	0.61245	1	1
4.58706	4.50639	51.3768	2.98002e-10	1.28958e-08	Fhl1	14199	X	56731787	56793346	0.931935	0.923577	1	0.994046	0.914447	0.922025	1	1	0.929553	0.646465	1	1	0.882933	0.800369	1	0.995218	0.884167	0.827835	1	1	0.941083	0.825117	1	1	0.919788	0.883025	0.993526	1	0.623222	0.556745	0.986748	1	0.826227	0.884766	0.978585	1	0.738423	0.797086	1	1
4.6052	5.39171	48.4536	7.53045e-10	3.16765e-08	Gprasp1	67298	X	135742733	135803474	0.927794	0.88828	0.995324	1	0.854914	0.974787	1	1	0.968523	0.744343	1	1	0.985284	0.862213	1	1	0.909621	0.952052	1	1	0.878199	0.936371	1	1	0.938526	0.943408	1	1	0.753387	0.654586	1	1	0.986818	0.851658	1	1	0.78022	0.707561	1	1
4.61394	5.13074	63.2274	8.53232e-12	4.0805e-10	Ubqln2	54609	X	153498227	153501570	0.907364	0.871998	0.988518	1	0.919574	0.984243	0.994892	0.995399	0.947901	0.761626	1	1	0.96145	0.782802	1	0.994627	0.964501	0.97642	1	1	0.943265	0.922641	0.994337	1	0.942368	0.937879	1	1	0.877668	0.78788	0.989548	1	0.973388	0.96602	0.989297	0.991965	0.789214	0.652266	0.994472	0.989174
4.61606	7.63249	45.5559	1.92904e-09	7.94359e-08	Cox7b	66142	X	106015700	106022450	0.919468	0.932081	1	0.999081	0.84961	0.826233	0.994619	0.992712	0.952618	0.861777	0.999101	0.996247	0.975575	0.930054	0.998381	0.99912	0.801325	0.839734	0.998344	0.996935	0.791882	0.809231	0.996963	0.9973	0.938322	0.939928	0.998088	0.997231	0.805556	0.783018	0.99854	0.991185	0.880605	0.845585	0.990104	0.997307	0.92205	0.814489	0.996504	0.998371
4.62085	0.86769	24.5315	7.0213e-06	0.000221869	Gm5124	331392	X	21360865	21364622	1	1	#NUM!	1	1	1	1	1	1	0.49574	1	1	1	1	1	1	1	1	1	1	#NUM!	1	1	1	1	1	1	1	0.78472	1	1	1	0.705263	1	1	1	1	1	1	1
4.6259	2.38262	46.8926	1.24648e-09	5.19855e-08	Rtl8c	72865	X	53608032	53608432	0.810086	0.79005	1	1	1	1	1	1	0.797321	0.903283	1	1	1	0.287898	1	1	1	0.953194	1	1	0.881715	0.930764	1	1	1	0.912124	1	1	0.959926	1	1	1	1	0.89816	1	1	0.668945	0.63289	1	1
4.63171	0.529279	24.9497	7.77718e-06	0.000244569	Gm26415		X	109115225	109115516	1	1	1	1	1	1	1	1	1	1	1	1	1	0.386089	1	1	1	1	1	#NUM!	1	1	1	1	#NUM!	1	1	1	0.675632	1	1	1	1	1	1	1	1	#NUM!	1	1
4.63335	0.232069	21.214	4.90176e-05	0.00143746	Gm26652		X	19224789	19237856	1	1	1	1	1	1	1	1	1	#NUM!	1	#NUM!	1	1	#NUM!	1	1	1	1	1	1	1	1	1	#NUM!	#NUM!	#NUM!	#NUM!	1	1	#NUM!	#NUM!	#NUM!	#NUM!	#NUM!	#NUM!	1	#NUM!	1	#NUM!
4.64986	1.37275	60.7416	3.63248e-11	1.64471e-09	Cfp	18636	X	20925454	20931555	1	0.894368	1	1	0.891564	1	1	1	1	0.907673	1	1	1	0.738907	1	1	1	1	1	1	1	1	1	0.912327	1	1	1	1	0.925912	1	1	1	1	1	1	1	0.487414	0.8391	1	1
4.67779	0.472742	12.9763	0.000767254	0.0193687	Gm4234		X	102754781	102757471	1	1	1	1	#NUM!	#NUM!	#NUM!	#NUM!	1	1	1	1	1	1	1	1	1	#NUM!	1	#NUM!	1	#NUM!	#NUM!	#NUM!	1	1	1	1	#NUM!	0	#NUM!	1	1	1	#NUM!	1	1	1	1	#NUM!
4.68147	3.56321	71.3155	8.92843e-13	4.5598e-11	Praf2	54637	X	7728439	7731064	0.964899	0.843156	1	1	0.924998	0.955738	1	0.98377	0.971371	0.700138	1	1	0.951253	0.814894	1	0.981722	1	0.985967	1	1	0.951009	0.942154	1	1	0.830494	0.951959	1	1	0.92813	0.81354	1	0.979752	1	0.952516	1	1	0.859708	0.599234	1	1
4.68784	0.888322	38.2967	3.15794e-08	1.20408e-06	Fam120c	207375	X	151344175	151471842	1	0.79005	1	1	1	1	1	1	1	1	1	1	1	1	1	1	1	1	1	1	0.756448	1	1	1	0.652344	1	1	1	0.454496	0.826381	1	1	1	0.75685	1	1	0.768953	0.739892	1	1
4.69185	2.47992	81.6365	1.10621e-13	6.12958e-12	Atg4a	666468	X	140956907	141164270	0.929926	0.896929	1	1	0.945864	1	1	1	1	0.945068	1	1	1	1	1	1	1	1	1	1	1	0.93539	1	1	1	1	1	1	0.903597	0.787325	1	1	0.934884	0.912093	1	1	0.889899	0.917096	1	1
4.70347	5.11851	74.1631	4.15183e-13	2.17721e-11	Ids	15931	X	70343069	70365084	0.899685	0.856962	1	1	0.939771	0.960462	0.995381	1	0.952963	0.828437	0.992653	1	1	0.852635	1	1	0.9835	0.983062	0.991455	1	0.981141	0.985229	1	1	0.972242	0.963945	1	1	0.900603	0.883931	1	1	0.974545	0.954298	1	1	0.775445	0.710492	1	0.99309
4.70745	2.89346	115.021	6.84566e-17	5.5331e-15	A230072C01Rik		X	20961684	20986737	0.955213	0.865384	1	1	1	0.939111	1	1	0.97521	0.864685	0.973455	1	0.941801	0.927195	0.969283	1	1	1	1	1	0.920606	1	1	1	1	1	0.953945	1	0.831846	0.908021	1	1	0.968519	0.968873	1	1	0.943313	0.895109	1	0.970855
4.71086	0.220999	22.1479	1.2512e-05	0.000386018	Porcn	53627	X	8193848	8206525	#NUM!	1	1	1	#NUM!	1	1	1	0.662955	0	1	1	0	#NUM!	#NUM!	1	#NUM!	1	1	#NUM!	1	0	1	1	#NUM!	#NUM!	#NUM!	#NUM!	0.510154	0.760373	1	1	0	1	1	#NUM!	0	1	1	1
4.72078	7.32616	133.498	6.56047e-19	7.82456e-17	Rpl10	110954	X	74270812	74273135	0.9439	0.913671	0.98497	0.976581	0.92186	0.964964	0.976499	0.989403	0.947595	0.865183	0.995209	0.953848	0.966686	0.912674	0.978234	0.98835	0.977429	0.938358	0.99249	0.98527	0.928235	0.929743	0.987946	0.985399	0.914236	0.913429	0.98484	0.982394	0.915242	0.881357	0.992675	0.989804	0.952223	0.925966	0.993971	0.987311	0.916127	0.844376	0.98778	0.975594
4.7389	0.234925	23.7487	1.13737e-05	0.000352568	Gm14861		X	103486934	103487388	#NUM!	1	1	1	1	1	1	1	1	1	1	1	1	1	1	1	1	1	1	#NUM!	1	1	1	#NUM!	1	1	1	1	1	1	1	#NUM!	1	#NUM!	#NUM!	1	1	0.486703	1	1
4.7401	2.66504	24.4911	4.92151e-06	0.000157553	Efhc2	74405	X	17132049	17319368	1	1	1	1	1	0.891609	1	1	1	1	1	1	1	1	1	1	1	#NUM!	1	1	#NUM!	0.837939	#NUM!	1	0.872375	0.990193	1	1	0.808033	0.781473	1	0.948845	0.770254	0.743103	0.985832	1	1	0.883525	1	1
4.74126	4.85568	74.5619	3.73386e-13	1.9739e-11	Mecp2	17257	X	74026592	74135363	0.901131	0.864813	1	1	0.926035	0.98658	1	1	0.945899	0.821843	1	1	0.975165	0.851679	0.992424	1	1	0.993226	1	1	0.924411	0.969269	1	1	0.918423	0.978398	1	1	0.873313	0.785128	0.99401	0.995973	0.965391	0.946014	0.993071	0.99321	0.87828	0.767718	0.993678	1
4.74642	4.28059	90.0724	7.36954e-15	4.66499e-13	Rps6ka3	110651	X	159210307	159368244	0.962838	0.847704	0.990307	1	0.942674	0.952879	1	1	0.950198	0.899459	1	0.967585	0.957641	0.909969	1	0.988794	0.988478	1	1	1	0.919278	0.964921	1	1	0.969015	0.964745	1	0.981065	0.920323	0.832303	1	0.992787	0.962168	0.924193	1	1	0.886504	0.870303	0.990741	1
4.75607	4.7544	76.7337	2.10537e-13	1.14075e-11	Foxo4	54601	X	101254528	101260873	0.927241	0.907364	1	1	0.916591	0.967858	1	0.993533	0.955548	0.902622	1	1	0.980917	0.875604	1	1	0.962744	0.977922	1	0.988713	0.827236	0.970367	1	1	0.969386	0.975671	1	1	0.898913	0.781873	1	1	0.937989	0.921889	0.989914	1	0.891983	0.849684	1	1
4.76314	7.44574	44.1368	3.08297e-09	1.25631e-07	Maged1	94275	X	94535474	94542143	0.883021	0.860787	0.993176	1	0.884807	0.920249	0.998852	0.997274	0.877339	0.826488	0.99432	0.998252	0.874627	0.749553	0.998771	0.998348	0.939949	0.911952	0.998308	0.998152	0.864915	0.897687	1	0.997962	0.882431	0.909491	0.998097	0.998639	0.917034	0.872113	1	0.998506	0.938832	0.943548	0.997499	1	0.824297	0.727918	0.996882	0.996475
4.76613	3.70669	67.7153	3.04483e-12	1.4964e-10	Tmem255a	245386	X	38196573	38252439	0.945353	0.922201	1	1	0.937117	0.932801	1	1	1	0.806882	1	0.973334	0.980917	0.851949	1	1	1	1	1	1	0.940435	0.966617	1	1	1	1	1	1	0.612097	0.608046	1	1	0.982262	0.982778	1	1	0.921431	0.743408	1	1
4.76624	0.307173	31.1147	1.21401e-06	4.0871e-05	Gm23121		X	77579487	77579659	1	1	1	1	1	1	1	1	0.797321	1	1	#NUM!	1	1	1	1	1	1	1	1	#NUM!	1	1	1	1	#NUM!	1	1	1	1	1	#NUM!	1	1	#NUM!	1	1	1	1	1
4.76942	3.98003	95.9428	1.83144e-15	1.26138e-13	Haus7	73738	X	73437315	73459044	0.892405	0.944818	0.9685	0.976729	0.977873	0.977012	0.984671	1	0.972282	0.789179	1	0.968415	0.976681	0.959323	1	0.989578	0.956618	1	1	1	0.973144	1	1	0.967381	0.94859	0.986595	1	1	0.881241	0.833514	1	1	0.940812	0.959214	0.935649	1	0.873575	0.831979	0.989652	0.970583
4.78002	1.15733	73.5454	7.35658e-12	3.5442e-10	Gm15243		X	160527501	160533045	1	1	1	1	1	0.891609	1	1	1	1	1	1	1	1	1	1	1	1	1	1	1	1	1	1	1	1	1	1	1	1	1	1	1	1	1	1	1	1	1	1
4.79101	5.35186	66.407	3.46058e-12	1.69647e-10	Ndufa1	54405	X	37187588	37191163	0.944877	0.938683	1	1	0.894503	0.884645	1	1	0.941842	0.897727	1	1	0.952787	0.953584	1	0.996021	0.929729	0.855195	1	1	0.897184	0.818858	1	1	0.920632	0.923637	0.995993	1	0.83805	0.830622	1	1	0.836803	0.84969	0.994401	1	0.932594	0.88962	0.995892	1
4.79291	4.25678	86.7142	1.67051e-14	1.0243e-12	Phka1	18679	X	102513975	102644246	0.936658	0.903916	1	1	0.905286	0.978845	0.989151	1	0.974269	0.88904	1	1	1	0.967609	1	1	0.989247	0.942843	0.986713	1	0.908583	0.96276	1	1	0.99199	0.973211	1	1	0.908931	0.688032	1	0.994495	0.950564	0.942335	1	0.990059	0.871837	0.907727	0.990821	1
4.79405	4.65685	83.2608	3.944e-14	2.34482e-12	Cdk16	18555	X	20687954	20699880	0.896791	0.944239	1	1	0.901019	0.98658	0.992214	0.988603	0.956763	0.84258	0.973624	0.985932	0.966384	0.938465	1	1	0.897813	0.968555	1	1	0.909862	0.954953	1	0.992431	0.828835	0.954043	1	1	0.792474	0.81735	0.991821	1	0.921593	0.912816	0.99297	1	0.824219	0.78638	0.992669	0.991024
4.79609	3.39949	130.239	1.23268e-18	1.41831e-16	AW822252	331578	X	53695855	53716773	0.886623	0.906727	1	0.965866	0.972952	1	1	1	0.907705	0.818915	0.959421	0.972983	0.974409	0.894628	0.917302	1	0.968759	1	1	1	1	1	0.970466	1	1	0.926709	0.95327	0.990442	0.990394	0.987551	0.992652	0.99154	0.971299	0.985164	1	0.980314	0.895376	0.883525	1	0.92901
4.80018	2.55585	51.4945	2.87214e-10	1.24565e-08	Gabre	14404	X	72255999	72274803	1	0.918627	1	1	0.860462	1	1	1	0.949203	0.440241	1	1	0.930201	1	1	1	1	0.884217	1	1	0.805492	1	1	1	0.900688	1	1	1	0.936424	0.856356	1	1	1	0.984932	1	1	0.904843	0.883525	1	1
4.80709	3.08606	72.5421	6.40859e-13	3.33383e-11	Chic1	12212	X	103356476	103396092	0.892951	0.929432	1	1	0.930366	0.978845	1	0.979179	0.904825	0.673684	0.964313	1	0.87714	0.887945	1	1	0.967169	0.926245	1	1	0.96052	0.850469	1	1	0.709245	0.899641	1	1	0.843281	0.669672	0.95902	0.950871	0.924847	0.933365	1	1	0.701689	0.552926	1	1
4.80946	5.07643	80.7612	7.42965e-14	4.18801e-12	Syap1	67043	X	162857057	162888447	0.933368	0.91383	1	0.988847	0.919184	0.954707	1	0.992154	0.954409	0.883978	0.994896	0.993886	0.978288	0.90773	1	1	0.966016	0.959292	1	1	0.936991	0.949548	1	1	0.967437	0.961547	1	1	0.856905	0.862176	1	1	0.938065	0.921889	1	1	0.895894	0.801185	1	1
4.82213	6.45299	58.9387	2.97819e-11	1.36745e-09	Yipf6	77929	X	98936316	98949017	0.916063	0.929069	1	0.997282	0.888456	0.928695	1	1	0.912403	0.797835	1	1	0.929022	0.919005	1	1	0.906884	0.871602	1	0.997711	0.880073	0.861419	0.995491	1	0.940278	0.942345	1	1	0.872431	0.858871	1	1	0.925633	0.905174	0.994589	0.998329	0.899559	0.82352	1	1
4.82745	8.41775	56.4099	6.34047e-11	2.85102e-09	Ddx3x	13205	X	13280970	13294052	0.883676	0.878508	0.996792	0.99215	0.903701	0.904164	0.996802	0.99448	0.898394	0.775083	0.996508	0.993524	0.937135	0.885646	0.991925	0.993552	0.930463	0.912737	0.9941	0.997813	0.911619	0.928153	0.996645	0.990888	0.851599	0.880424	0.996515	0.994257	0.858404	0.854999	0.996214	0.991861	0.893593	0.909172	0.995476	0.996685	0.877494	0.784356	0.996372	0.991992
4.83994	4.08465	98.0877	1.11408e-15	7.95309e-14	Igbp1	18518	X	100494291	100516125	0.876127	0.935545	0.978453	1	0.955209	0.988279	1	1	0.941715	0.805031	1	1	0.913621	0.859235	0.991768	0.990438	1	0.986164	1	1	0.988893	0.986926	0.969059	0.982828	0.877004	0.869978	1	1	0.922939	0.865809	1	1	1	0.967289	1	1	0.881192	0.783804	0.983252	1
4.84668	0.516293	38.4941	1.79584e-07	6.55346e-06	Zxda		X	94795563	94798183	1	1	1	1	1	1	1	1	1	1	1	1	1	1	1	1	1	1	#NUM!	1	1	1	1	#NUM!	1	1	1	1	1	1	1	1	1	1	1	1	1	1	1	1
4.85154	3.54381	92.0824	4.55075e-15	3.00718e-13	Ebp	13595	X	8185329	8193512	0.83593	0.933825	1	1	0.957646	0.985478	1	1	0.953107	0.927433	1	1	0.981258	0.876163	1	1	0.966016	0.982457	1	1	1	0.984395	1	0.98813	0.865066	0.857936	1	1	0.852635	0.853317	1	1	0.959328	0.970312	1	1	0.951204	0.802033	1	1
4.8834	3.37011	41.9196	7.31955e-09	2.89233e-07	Eda2r	245527	X	97333840	97377216	1	0.95391	1	1	0.891564	0.837164	1	1	1	0.802188	1	1	1	1	1	1	0.925394	1	1	1	1	0.966617	1	1	0.980163	0.977239	1	1	0.836945	0.875115	1	1	0.809737	0.941813	1	1	0.912739	0.748745	1	1
4.89173	6.02273	73.1663	5.41906e-13	2.82658e-11	Lamp2	16784	X	38401357	38456454	0.915599	0.93517	1	0.997261	0.904531	0.943256	0.997021	1	0.960918	0.841053	1	0.997958	0.970779	0.939221	0.99751	0.996812	0.984935	0.937433	1	1	0.925504	0.924594	1	0.995253	0.95942	0.94717	1	1	0.861159	0.803648	0.99311	1	0.950113	0.955567	0.996853	1	0.828308	0.774872	0.994384	1
4.90497	3.07612	83.4916	5.0825e-14	2.94996e-12	Trappc2	66226	X	166440574	166453140	0.952167	0.913671	1	1	0.869799	1	1	1	1	0.740327	1	1	0.968215	0.950833	1	1	1	1	1	1	0.978031	0.978495	1	1	0.976349	1	1	1	0.889762	0.701535	1	1	0.875499	0.977033	1	1	0.958842	0.828951	1	1
4.90937	2.90813	90.0775	7.3606e-15	4.66499e-13	Gm15138		X	151169700	151171764	0.902363	0.942737	1	1	0.915193	1	0.96883	1	1	0.933374	1	1	1	0.950833	1	1	0.97383	0.960689	1	1	1	0.854226	1	1	1	0.960836	1	1	0.943386	0.909488	1	1	1	0.912093	1	1	0.938326	0.795399	1	1
4.91028	9.00558	46.3891	1.4685e-09	6.11145e-08	Huwe1	59026	X	151800807	151935417	0.897168	0.903184	0.996039	0.997249	0.87437	0.842943	0.996174	0.997053	0.938668	0.822226	0.995434	0.992005	0.96731	0.920378	0.99665	0.9949	0.870267	0.868041	0.99928	0.995984	0.850837	0.900801	0.994104	0.994953	0.839448	0.870346	0.996389	0.994127	0.79241	0.787907	0.993921	0.99606	0.8535	0.843604	0.994508	0.99645	0.918958	0.818151	0.995065	0.996995
4.9113	3.57808	138.103	4.78878e-19	5.8911e-17	Tceal7	100040972	X	136214779	136226100	0.958718	0.897755	0.976008	0.957267	0.957646	1	1	1	0.980453	0.806882	0.976469	0.81413	1	0.939054	0.966849	0.903838	1	1	1	1	0.978519	0.969749	1	0.95753	0.981322	0.982056	0.921685	0.975908	0.965033	0.929157	1	1	0.94993	0.981453	1	1	0.946212	0.87973	0.984251	0.973094
4.92336	3.72297	64.954	5.21401e-12	2.53067e-10	Prps2	110639	X	167346322	167382749	0.941569	0.964642	0.987273	1	0.929355	0.931378	1	1	0.975509	0.749904	1	1	1	0.876962	1	1	0.981735	1	1	1	0.942216	0.906722	1	0.974347	0.950191	0.985495	1	1	0.634471	0.625179	1	1	1	0.811267	0.956159	0.964253	0.821002	0.804863	1	1
4.92611	3.18641	75.6708	2.78401e-13	1.49193e-11	Nbdy	70123	X	153723590	153741920	0.953227	0.890749	1	1	0.915193	0.959431	1	1	0.924775	0.86003	1	0.980626	0.975018	0.921825	1	1	1	0.946863	1	1	0.915758	0.975184	1	1	0.969604	1	1	1	0.81861	0.798648	1	1	0.94861	0.912093	1	1	0.768953	0.782756	1	1
4.93374	2.98156	105.624	3.08094e-16	2.33578e-14	Apoo	68316	X	94367117	94417093	0.976053	1	0.974254	1	0.777499	1	1	1	0.980069	0.963694	1	1	1	0.972148	1	1	0.867487	0.970224	0.932992	1	1	1	1	1	1	1	0.983675	1	1	0.916176	1	1	0.928519	0.939626	1	1	0.963801	0.975505	1	1
4.94008	4.90342	60.3555	1.96219e-11	9.15999e-10	Dcaf12l1	245404	X	44786570	44790197	0.983	0.880066	0.993747	1	0.858203	0.991541	1	1	0.965356	0.932091	1	0.996795	1	0.882997	0.995114	1	0.938307	0.988165	1	0.987393	0.885906	0.927294	1	1	0.974357	1	1	1	0.911797	0.879256	0.989489	1	0.984266	0.821267	1	1	0.86466	0.751623	1	1
4.94344	3.92316	97.2432	1.35394e-15	9.49216e-14	2610002M06Rik	67028	X	107782751	107816334	0.966567	0.925299	1	1	0.891564	0.981287	1	1	1	0.939335	1	0.977919	1	0.943644	1	1	0.983311	0.989086	1	1	0.981048	0.989007	1	1	1	1	1	1	0.869543	0.781873	1	1	0.951183	0.969847	1	1	0.875343	0.828389	1	1
4.94876	1.8461	84.9874	4.92049e-14	2.87298e-12	Foxp3	20371	X	7573644	7595245	0.869029	1	1	1	0.961038	0.935045	1	1	1	0.680517	1	1	1	1	1	1	1	1	1	1	0.923538	0.925425	1	1	1	0.929629	1	1	1	0.952599	1	1	1	1	1	1	1	0.68871	0.86891	1
4.9495	4.71627	83.8401	3.41038e-14	2.03997e-12	Efnb1	13641	X	99136130	99148991	0.93429	0.880687	1	0.986418	0.958674	0.961568	1	0.993064	1	0.802508	1	0.982521	0.979219	0.825076	0.982289	0.977836	0.971307	0.96146	0.97778	0.970115	0.918522	0.906978	1	0.989258	1	0.977717	1	1	0.848435	0.760373	0.98943	0.993133	0.959995	0.961648	0.973226	1	0.809755	0.787645	0.993318	1
4.95122	5.60326	152.214	2.09186e-20	3.22179e-18	Plp2	18824	X	7667941	7671390	0.929926	0.944906	0.97654	0.987337	0.951887	0.965076	0.995729	1	0.980263	0.864685	0.988822	0.952053	0.990094	0.914566	0.984721	0.980849	0.990274	0.986419	0.995176	1	0.949793	0.965695	0.995784	1	0.956315	0.951761	0.995947	0.9867	0.920868	0.906888	0.995821	1	0.955809	0.977825	1	1	0.898484	0.874836	0.979906	0.987682
4.95161	3.3401	62.8032	9.63897e-12	4.5873e-10	Gm28730		X	53051194	53053159	0.929926	0.824678	1	1	0.924998	1	1	1	0.949203	0.815633	1	1	0.979011	0.901177	1	1	0.942982	0.831125	1	1	0.951622	0.934662	1	1	0.882431	0.959333	0.967875	1	0.775272	0.817048	1	1	0.919412	0.925655	0.987958	1	0.7952	0.814682	1	1
4.95744	6.71828	69.2302	1.57885e-12	7.8581e-11	Rpl36a	19982	X	134585654	134588062	0.930086	0.885861	1	1	0.928496	0.946929	0.997222	0.995084	0.933471	0.759867	0.989321	1	0.947191	0.891691	1	0.997524	0.959969	0.959571	0.997265	1	0.891069	0.921125	0.998677	0.997277	0.832246	0.932286	0.99388	0.997279	0.922185	0.891032	0.996986	1	0.964041	0.944314	1	0.995081	0.899216	0.696299	0.99736	0.988201
4.97766	3.02558	78.2672	1.41162e-13	7.75597e-12	4933407K13Rik	74396	X	75706932	75764699	0.953227	0.975876	1	1	0.871518	0.970504	1	1	0.960152	1	1	1	1	0.810891	0.981984	1	0.889022	1	0.96117	1	0.833443	0.864443	0.96751	1	0.931525	1	0.97643	1	0.928664	0.701535	1	1	0.926729	0.717216	1	1	0.863747	0.914866	0.934226	1
4.98029	4.93694	114.407	3.05576e-17	2.61008e-15	Chm	12662	X	113040593	113185517	0.942524	0.937336	0.990033	0.983363	0.939558	0.950813	1	1	0.976581	0.838127	0.994147	1	0.964249	0.927195	0.994192	0.99494	0.959635	0.985116	1	0.98661	0.984026	0.939779	0.993043	0.993758	0.993769	0.980396	0.989644	0.982227	0.853261	0.798648	1	0.988292	0.974152	0.958748	1	1	0.918947	0.833403	0.974769	0.987646
4.99992	2.35127	82.3072	5.01595e-14	2.92e-12	Kantr		X	152294828	152327495	1	1	1	1	0.837101	1	1	1	1	0.774818	1	1	1	0.817549	1	1	0.937453	1	1	1	0.925504	1	1	1	0.937544	1	1	1	1	0.858794	1	1	1	0.943185	1	1	0.930131	0.883525	1	1
5.00239	5.30063	86.7951	1.6376e-14	1.00728e-12	Zfp275	27081	X	73342621	73359080	0.912058	0.913567	1	0.993376	0.946113	0.987447	0.995359	0.99567	0.956204	0.811067	1	1	0.99516	0.892688	0.994583	1	0.96169	0.987873	1	1	0.951215	0.953695	0.995709	1	0.978711	0.987897	1	1	0.89968	0.867412	0.995251	0.99486	0.979842	0.943488	0.995161	0.974875	0.851467	0.747671	1	1
5.01471	5.45798	93.8965	2.95954e-15	1.98249e-13	Acot9	56360	X	155262443	155297654	0.959287	0.891787	1	1	0.912732	0.987762	0.995149	1	0.991003	0.916227	1	0.997257	0.945298	0.889868	1	1	0.984471	0.98767	1	1	0.970551	0.964793	1	1	0.98836	0.961076	1	1	0.956605	0.902765	1	1	0.966475	0.940861	1	0.995031	0.919717	0.81461	1	0.995848
5.0308	5.03204	76.3297	2.34073e-13	1.26477e-11	Bhlhb9	70237	X	135797594	135891081	0.948814	0.911882	1	0.98708	0.930779	0.988555	1	1	0.977579	0.862729	1	0.992557	0.972209	0.921825	1	1	0.989002	0.959532	1	1	0.927734	0.962135	1	1	0.917155	0.957711	1	1	0.864583	0.788723	1	1	0.962135	0.957333	1	1	0.787885	0.667047	1	1
5.03518	3.1159	124.486	6.34204e-18	6.2562e-16	1110012L19Rik	68618	X	70385877	70389417	0.978047	0.979968	1	1	0.955719	0.935045	0.957036	0.963137	0.984361	0.95327	0.973455	1	1	0.980391	1	1	0.91916	0.974144	1	1	0.861338	1	0.976233	0.974685	0.979528	1	1	1	0.972535	0.729953	0.939114	1	0.930224	1	1	1	0.978561	0.833662	0.986808	1
5.03828	2.56496	82.2174	6.96549e-14	3.98377e-12	Fam3a	66294	X	74384719	74393272	1	0.920652	0.970684	1	1	0.962555	1	1	1	0.815633	1	1	1	0.912102	1	1	0.942982	0.848493	1	1	1	1	1	1	0.8866	0.955953	1	1	1	0.940708	1	1	1	0.959781	1	1	1	0.791352	1	1
5.03892	1.68413	95.1674	5.14125e-14	2.97523e-12	L1cam	16728	X	73853778	73896105	0.843049	1	1	1	1	1	1	1	1	1	1	1	0.90905	0.929612	0.94783	1	1	1	1	1	1	1	1	1	1	1	1	1	1	1	1	1	1	1	1	1	1	0.739892	1	1
5.03949	4.09176	90.8539	6.10594e-15	3.94166e-13	Phf8	320595	X	151520672	151633859	0.977339	0.975876	1	1	0.918734	0.905194	1	1	0.952375	0.857186	1	1	0.96187	0.904155	1	1	0.967717	1	1	1	1	0.944104	1	1	0.955088	0.942382	0.93775	1	0.838899	0.91091	0.986264	1	0.958754	0.979257	0.980728	1	0.925819	0.828951	1	1
5.04245	7.02958	70.7473	1.04206e-12	5.2805e-11	Smc1a	24061	X	152016428	152062694	0.938436	0.926442	1	0.993719	0.915973	0.927504	0.996097	0.997312	0.966631	0.788602	0.996762	0.991799	0.974615	0.910673	0.996951	0.994779	0.916545	0.950775	0.998659	0.989655	0.918748	0.946917	0.991983	0.998707	0.857011	0.867691	1	0.99828	0.796568	0.813241	0.991807	0.992929	0.902553	0.869079	0.994027	0.998465	0.900891	0.796923	0.995127	0.998263
5.05314	5.06077	83.0668	4.14124e-14	2.45462e-12	Atp11c	320940	X	60223290	60592698	0.937036	0.925548	1	0.994537	0.921264	0.992847	1	1	0.96461	0.824211	1	1	0.993045	0.888811	1	1	0.943399	0.982029	1	1	0.903079	0.950467	0.993796	1	0.983619	0.975837	0.995932	1	0.907095	0.80788	1	1	0.985655	0.971455	0.982997	1	0.861504	0.758872	1	1
5.06237	4.07425	97.6861	1.22218e-15	8.66156e-14	Mcts1	68995	X	38600578	38613426	0.919191	0.94767	1	1	0.915717	1	1	1	0.976363	0.755486	1	1	0.983851	0.931874	1	1	0.966982	1	1	1	0.978278	0.979411	1	0.973027	0.972716	0.950269	1	1	0.864213	0.929684	1	1	0.974545	0.981089	0.988928	1	0.844568	0.762232	0.976029	1
5.06423	3.79671	90.4902	6.66379e-15	4.2596e-13	Rp2	19889	X	20364481	20405653	0.960021	0.933825	1	1	0.874824	0.985031	1	1	0.977159	0.888737	1	0.979256	0.98542	0.87201	1	1	1	0.954284	1	1	0.957006	0.959083	1	1	1	0.985293	0.97857	0.972824	0.859522	0.881009	1	1	0.915023	0.955443	1	1	0.9448	0.786061	0.988142	1
5.08188	0.644228	29.3806	1.46712e-06	4.88873e-05	Gm9003		X	94422678	94423295	1	1	1	1	1	1	1	1	1	1	1	1	1	1	1	1	1	1	1	1	0.783716	1	1	1	1	1	1	1	1	1	1	1	1	1	1	1	1	0.321617	1	1
5.09303	3.15527	133.694	1.08534e-18	1.26365e-16	Zfp36l3	333473	X	53774048	53776394	0.962397	0.954888	1	0.921814	0.973684	1	1	1	1	0.833262	1	0.984078	0.980564	0.975382	1	0.949245	1	1	1	1	1	0.970667	1	0.954154	1	1	1	1	0.95818	1	1	1	0.921835	1	1	1	1	0.961018	1	1
5.09975	4.89186	170.893	8.7646e-22	1.84339e-19	Xlr3c	22446	X	73254540	73265390	0.981828	0.95391	1	0.947799	0.964454	0.980538	0.972237	0.980974	0.936517	0.840245	0.940342	0.892166	0.990278	0.979638	0.972869	0.91342	0.965051	0.961078	0.939286	0.959517	0.949294	0.960566	0.969222	0.939791	0.984225	0.986158	0.990522	0.989391	0.96063	0.926968	0.970871	0.986637	0.929029	0.940373	0.985291	0.968463	0.988191	0.910387	0.929858	1
5.10074	1.26053	64.0526	1.91901e-11	8.97988e-10	Flicr	78185	X	7573600	7581027	1	0.868166	1	1	1	1	1	1	1	0.815633	1	1	1	0.849852	1	1	1	1	1	1	1	1	1	1	1	1	1	1	1	0.926968	1	1	1	1	1	1	0.791822	1	1	1
5.10387	1.35865	57.924	9.28757e-11	4.11939e-09	Pir	69656	X	164269371	164373011	1	0.859451	1	1	1	1	1	1	0.766261	1	1	1	1	1	1	1	1	1	1	1	1	1	1	1	0.90368	1	1	1	1	0.514025	1	1	1	0.633602	1	1	0.95231	0.904597	1	1
5.11436	6.01446	64.731	5.55454e-12	2.68928e-10	Tmem164	209497	X	142681406	142843494	0.958947	0.925231	0.997403	1	0.909261	0.948739	1	1	0.982813	0.856504	1	0.994536	0.986609	0.902113	1	0.997285	0.962422	0.989513	1	1	0.879205	0.915788	1	1	0.99285	0.977133	0.995003	0.997532	0.86865	0.739012	1	1	0.970783	0.942212	0.996713	1	0.823541	0.777544	1	1
5.11763	0.978963	33.3582	3.46029e-07	1.22615e-05	Usp51	635253	X	153006469	153009416	1	1	1	1	1	1	1	1	0.873167	0.893121	1	0.858826	1	1	1	1	1	1	1	1	1	1	1	1	1	1	1	1	0.862045	1	1	1	1	1	1	1	0.850866	1	1	1
5.12544	4.67003	80.8942	7.18169e-14	4.08355e-12	Irak1	16179	X	74013914	74023918	0.963376	0.895063	1	1	0.929864	0.96614	1	1	0.956946	0.820711	0.976199	1	0.950488	0.870093	1	1	0.95757	0.913209	1	1	0.873124	0.950866	0.985126	1	0.981322	0.968885	1	1	0.875912	0.762199	1	1	0.945752	0.951723	1	1	0.831077	0.738147	1	0.993785
5.13443	5.16822	103.035	3.62023e-16	2.71309e-14	Tfe3	209446	X	7762560	7775202	0.93107	0.943247	0.995484	1	0.940573	0.956723	0.995245	0.994092	0.990177	0.860629	1	0.992007	0.981799	0.918416	0.995394	1	0.959352	0.98504	1	1	0.95393	0.925425	0.994792	0.995487	0.905284	0.932434	1	1	0.881099	0.85467	1	1	0.927635	0.967835	1	1	0.879375	0.843367	1	0.995864
5.13633	5.18384	111.46	5.7172e-17	4.69868e-15	Zdhhc9	208884	X	48171969	48208878	0.962776	0.938306	1	0.989909	0.925572	0.966238	0.982224	1	0.978374	0.935075	1	1	0.986794	0.927691	1	1	0.982714	0.957532	1	1	0.925504	0.926637	0.992676	1	0.987421	0.980305	0.995786	1	0.930697	0.86602	1	1	0.94397	0.947957	0.989473	1	0.915372	0.83945	1	0.994748
5.14943	6.28046	82.8911	4.32857e-14	2.55021e-12	Fam122b	78755	X	53243415	53269805	0.966113	0.888314	1	0.997289	0.943131	0.969221	1	1	0.98428	0.859729	0.997656	0.987215	0.994149	0.93371	1	1	0.962854	0.989956	1	1	0.959603	0.973949	0.997528	0.998043	0.975314	0.980601	1	1	0.850956	0.854098	1	0.996108	0.984423	0.961025	0.997776	1	0.882738	0.793849	1	1
5.15932	5.17152	93.0052	3.65417e-15	2.43114e-13	Ikbkg	16151	X	74393290	74453854	0.966246	0.88915	0.993048	1	0.943876	0.984556	0.995489	1	0.984199	0.836883	1	0.985687	0.96187	0.912102	1	1	0.994594	0.965519	1	1	0.919652	0.96258	1	0.994994	0.937544	0.966944	1	0.993409	0.88941	0.852924	0.988597	1	0.985513	0.944377	1	1	0.882738	0.764598	1	1
5.16985	5.45508	85.0504	2.52124e-14	1.5174e-12	Zfp280c	208968	X	48541625	48594504	0.974393	0.915904	1	0.996419	0.938633	0.978443	1	0.992403	0.986755	0.858406	1	1	1	0.935148	0.996491	0.993465	0.979576	0.986419	1	1	0.958063	0.958967	1	0.997182	0.992801	0.923537	1	0.994823	0.797341	0.602225	1	1	0.987653	0.928416	0.985063	1	0.904843	0.799143	0.996637	1
5.17963	2.19886	56.7685	6.86029e-11	3.07065e-09	Nudt11	58242	X	6047453	6055110	0.90005	0.951082	1	1	1	1	1	1	0.963708	0.574788	1	1	1	0.671477	1	1	1	1	1	1	0.909156	1	1	1	1	1	1	1	1	0.888054	1	1	1	0.965534	1	1	0.855972	0.74683	1	1
5.18529	4.02145	119.662	1.02351e-17	9.63814e-16	Ssr4	20832	X	73787028	73790830	0.949293	0.96522	1	0.966228	0.963927	0.966432	1	0.988325	0.953817	0.883978	1	1	0.986711	0.927195	1	0.976326	0.952344	0.912842	1	0.960344	0.972765	0.917216	1	0.947085	0.908634	0.974803	1	0.986225	0.932031	0.873018	1	1	0.889458	0.976472	1	1	0.92773	0.873352	1	1
5.19704	7.49225	56.2712	6.61157e-11	2.96611e-09	Clcn5	12728	X	7153810	7319358	0.923566	0.928067	1	0.996039	0.889381	0.96302	1	0.998926	0.938508	0.833903	0.99915	0.997563	0.931047	0.866345	0.997506	0.997336	0.959914	0.934534	1	0.998248	0.914913	0.906244	1	0.997897	0.925043	0.916571	0.998788	0.99813	0.896406	0.828873	0.995383	1	0.949383	0.933961	0.993866	0.998263	0.844301	0.796641	0.995086	0.997358
5.19843	6.03597	93.0668	3.60121e-15	2.40409e-13	Idh3g	15929	X	73778963	73786897	0.979043	0.970606	1	1	0.914106	0.91453	0.997319	1	0.990476	0.928286	1	1	0.971646	0.963973	1	0.997457	0.961381	0.893091	1	1	0.877531	0.892158	0.995329	1	0.92635	0.955018	0.996983	1	0.927084	0.893612	1	1	0.869386	0.87825	1	0.994644	0.960499	0.899015	0.997115	0.99426
5.20469	3.8234	114.114	3.25073e-17	2.76454e-15	Upf3b	68134	X	37091678	37110322	0.987298	0.917841	1	1	0.97136	0.950311	1	1	0.988577	0.878189	1	1	0.981903	0.938761	1	0.988021	0.985334	0.925499	1	1	0.946237	0.925425	1	1	0.922005	0.964148	1	1	0.882332	0.840982	1	1	0.984758	0.95863	0.955138	0.981087	0.908962	0.843574	1	0.955068
5.20817	6.5592	80.3652	8.22117e-14	4.58137e-12	Otud5	54644	X	7841364	7876626	0.903831	0.942258	1	0.993641	0.946484	0.969582	1	0.994303	0.948838	0.810988	1	1	0.977633	0.943313	0.998004	1	0.964501	0.9735	0.997488	0.994824	0.963005	0.96276	0.994109	1	0.767172	0.883373	1	1	0.827364	0.85736	0.997673	1	0.912526	0.916245	0.988505	1	0.92979	0.893161	0.997758	0.997924
5.21567	6.90726	101.208	5.46335e-16	4.00236e-14	Firre	103012	X	50555744	50635321	0.968413	0.965946	0.975923	0.974614	0.941358	0.985657	0.997433	0.990499	0.974493	0.926227	0.982267	0.957154	0.974993	0.96305	0.967423	0.97498	0.961607	0.988774	0.993006	1	0.940739	0.934244	0.993434	0.99568	0.968751	0.968616	0.978117	0.965485	0.885064	0.840982	0.996098	1	0.943662	0.937555	1	0.996495	0.958795	0.907645	0.971047	0.962574
5.22725	1.27965	55.1797	1.33151e-10	5.86584e-09	Sytl4	27359	X	133936385	133981812	0.850465	1	1	1	1	1	1	1	1	0.534224	1	1	1	0.738907	1	1	1	1	1	1	1	0.943006	1	1	1	0.849887	1	1	1	1	1	1	1	1	1	1	0.571046	0.850504	1	1
5.22784	3.3789	122.312	5.96086e-18	5.94869e-16	Apool	68117	X	112311334	112372755	0.9087	0.915389	1	1	0.948717	1	1	1	1	1	1	0.963986	0.963838	0.956838	0.954622	1	0.981018	0.986725	1	1	0.876154	0.9553	1	0.981506	0.941001	0.9429	1	1	0.890807	0.833337	1	1	0.984992	1	1	1	0.904843	0.821603	1	1
5.23145	6.20662	165.474	2.14605e-21	4.1561e-19	Fmr1	14265	X	68678541	68717963	0.962751	0.937223	0.991292	0.990097	0.949556	0.967354	0.994041	0.991701	0.979971	0.890238	0.984356	0.977618	0.997432	0.950281	0.986212	0.99781	0.978325	0.973837	0.995479	0.993838	0.96469	0.983194	0.992269	0.992022	0.966846	0.984467	0.986067	0.988114	0.922402	0.921626	0.996947	0.995703	0.965709	0.966054	1	0.98882	0.923921	0.813902	0.989029	1
5.23208	1.25221	72.5683	3.02579e-12	1.49079e-10	Gm14884		X	20459490	20459685	0.93429	1	1	1	1	1	1	1	1	1	1	0.836337	1	1	1	1	1	1	1	1	1	1	1	1	1	1	1	1	0.943386	0.940708	1	1	1	1	1	1	1	0.739892	1	1
5.24273	0.445957	28.1023	1.29871e-06	4.35724e-05	Gm14582		X	52296181	52333679	1	1	1	1	1	1	1	1	0.662955	1	1	1	1	0	1	#NUM!	1	#NUM!	1	1	1	0.508383	1	1	1	0	#NUM!	1	0	1	1	1	1	1	1	1	1	0.654741	1	1
5.24524	0.683041	35.6726	3.114e-07	1.10745e-05	Gm14699		X	68782640	68782867	1	1	1	1	1	1	1	1	1	1	1	1	1	1	1	1	0.756154	#NUM!	#NUM!	1	1	1	1	1	1	1	1	1	1	1	#NUM!	1	1	1	1	1	1	1	1	1
5.24875	5.416	113.206	3.94048e-17	3.30798e-15	Rbm10	236732	X	20617503	20650901	0.931145	0.943091	1	1	0.941072	0.969028	0.992516	0.995839	0.921128	0.851064	1	0.977919	0.964299	0.928824	0.979829	0.995692	1	0.991605	1	0.994324	0.90354	0.92227	0.983694	0.995651	0.828859	0.89569	0.988768	0.993831	0.834265	0.83498	0.994746	1	0.872204	0.893899	0.990416	0.99532	0.872324	0.796764	1	1
5.2498	5.41194	91.7572	4.91802e-15	3.22807e-13	Snx12	55988	X	101097786	101222563	0.92844	0.941152	0.995175	1	0.948717	0.972838	1	1	0.953626	0.874048	0.996075	0.994678	0.974305	0.918833	1	1	0.98743	0.959262	1	1	0.942827	0.981829	1	1	0.968402	0.984197	1	0.995805	0.885028	0.837454	0.994998	1	0.933938	0.961198	1	1	0.885789	0.797672	1	1
5.25205	5.64759	89.1432	9.22738e-15	5.82218e-13	Gdi1	14567	X	74304998	74311862	0.957037	0.907912	1	1	0.948221	0.981641	1	0.995285	0.978063	0.846722	1	1	0.954818	0.914865	1	1	0.959874	0.961834	1	0.996379	0.92404	0.904826	1	1	0.939437	0.970813	1	1	0.890156	0.80592	1	1	0.945919	0.961251	1	0.987996	0.905233	0.81053	0.996396	1
5.26489	3.04324	105.709	4.6689e-16	3.43322e-14	Abcd1	11666	X	73716597	73738534	1	0.975876	1	1	0.918734	0.902478	1	1	1	0.966668	1	0.987551	1	1	1	1	1	1	1	1	1	0.943006	1	1	1	0.955953	1	1	0.963013	0.954862	1	1	1	0.939626	1	1	0.900334	0.88134	1	1
5.26573	4.14555	102.693	3.90961e-16	2.90768e-14	Zmym3	56364	X	101404384	101420849	0.950483	0.937703	1	1	0.92595	1	0.990891	1	0.988179	0.845405	1	1	0.989176	0.825076	1	1	1	0.973799	1	1	0.971281	0.950069	1	1	0.989019	0.982355	1	1	0.849916	0.858206	1	1	0.965755	0.973926	0.987958	1	0.826222	0.793752	0.988142	1
5.27085	0.299665	41.8959	5.49752e-08	2.06791e-06	Pnck	93843	X	73655994	73660117	1	1	1	1	1	1	1	1	1	0.662869	1	0.708742	1	1	1	1	1	1	1	#NUM!	1	1	1	1	1	1	1	1	1	1	#NUM!	#NUM!	1	1	1	1	1	#NUM!	1	#NUM!
5.27321	5.96537	72.4495	6.57046e-13	3.40897e-11	Eif1ax	66235	X	159372178	159389928	0.926369	0.940807	1	0.997282	0.917973	0.982354	1	1	0.965552	0.807453	1	0.992007	0.97275	0.914466	1	0.995387	0.963501	0.991151	1	1	0.952456	0.936506	1	0.997701	0.980075	0.983033	1	0.997662	0.827473	0.623431	0.994776	1	0.957557	0.927519	1	1	0.879119	0.745497	1	0.994668
5.27852	6.98842	80.9228	7.12952e-14	4.0657e-12	Magt1	67075	X	105968084	106011906	0.965284	0.930188	1	0.99684	0.928764	0.92653	0.998118	0.997769	0.978504	0.905316	1	0.995233	0.987949	0.930016	1	0.998401	0.965941	0.971565	0.998184	0.995534	0.907449	0.948952	0.996607	0.996885	0.975341	0.968444	1	0.996328	0.874104	0.833549	1	0.998478	0.949822	0.93362	1	0.99691	0.90656	0.864911	1	1
5.28281	6.25852	69.3836	1.51359e-12	7.55249e-11	Ndufb11	104130	X	20615326	20617619	0.919411	0.933306	1	1	0.95638	0.960097	1	0.997	0.972837	0.817174	0.992872	1	0.962099	0.908639	1	1	0.981962	0.960247	1	1	0.945784	0.913555	1	1	0.847156	0.917499	1	1	0.76009	0.782885	1	1	0.913837	0.877698	1	1	0.906622	0.785762	1	1
5.29992	3.00482	100.028	7.14199e-16	5.15488e-14	Itgb1bp2	26549	X	101449088	101453541	0.968085	0.799929	1	1	0.969085	1	1	1	0.955824	0.754432	1	0.921137	0.973099	0.904155	1	1	0.974519	1	1	1	1	0.97984	1	0.981506	1	1	1	1	0.960745	0.933788	1	1	0.982262	0.976472	1	1	0.689321	0.728742	1	1
5.30508	6.9456	88.2787	1.13865e-14	7.13848e-13	Bex3	12070	X	136270253	136271978	0.938143	0.935298	0.9902	0.993874	0.94365	0.967022	0.998441	0.998528	0.977838	0.835359	1	1	0.948684	0.940225	1	0.996114	0.983754	0.976007	1	0.996039	0.947451	0.941326	0.993033	0.996186	0.978672	0.971909	0.998348	0.997675	0.892838	0.874846	1	0.990755	0.963702	0.936677	0.994384	1	0.904573	0.806452	0.998472	0.993445
5.31019	4.64792	108.906	9.91668e-17	7.82138e-15	Ftsj1	54632	X	8238668	8252406	0.926679	0.920652	1	1	0.958252	0.991756	1	1	0.953817	0.812806	1	1	0.950432	0.966935	1	0.990776	0.982558	0.964903	1	1	0.958245	0.931982	0.992081	1	0.854758	0.92059	1	1	0.899564	0.855978	1	1	0.960956	0.939203	1	1	0.910024	0.870949	0.987285	1
5.3163	3.54182	75.9527	2.58467e-13	1.39273e-11	Hdx	245596	X	111569931	111697079	0.875225	0.911882	1	1	0.985252	0.981641	1	1	0.954506	0.610413	1	1	0.889176	0.870093	1	1	0.985972	0.944354	1	1	0.938735	0.938668	1	0.985431	0.959109	1	1	1	0.724598	0.68496	1	1	0.970429	0.882661	1	1	0.89938	0.720174	0.986295	1
5.32131	3.47152	124.155	4.10932e-18	4.25281e-16	Psmd10	53380	X	140948429	140956728	0.93429	0.979183	1	1	0.918734	0.976829	1	1	0.953817	0.883312	1	1	1	0.942368	1	1	0.982074	1	1	0.978891	1	0.960477	0.977854	0.986646	0.852629	0.958538	1	1	0.886505	0.881009	1	1	0.906013	0.981453	1	1	0.986172	0.83332	1	0.942847
5.32405	1.28006	23.764	8.27395e-06	0.000258942	3632454L22Rik	320606	X	135022734	135060336	1	1	1	1	1	1	1	1	1	1	#NUM!	1	1	0.738907	1	1	1	1	1	1	1	1	1	1	1	1	1	1	1	1	1	1	0.804	1	1	1	0.655385	1	1	1
5.32416	7.71076	50.9283	3.43071e-10	1.46821e-08	C430049B03Rik		X	53055046	53057190	0.936275	0.912824	0.999036	0.998945	0.884267	0.937867	0.996581	1	0.963986	0.839457	0.999022	0.995934	0.976407	0.895972	1	0.998697	0.952515	0.886333	1	0.999297	0.912001	0.931538	0.998229	1	0.890377	0.920467	0.998268	1	0.844233	0.870668	0.999403	0.998185	0.901158	0.923016	0.999442	0.997568	0.898966	0.832606	0.998057	0.996955
5.32524	2.59001	98.9586	9.12024e-16	6.55853e-14	Pja1	18744	X	99465734	99471273	1	0.974729	1	1	0.935017	1	0.925555	0.966956	0.945088	0.898456	1	1	1	0.901177	0.961333	1	1	0.886448	1	1	0.892269	0.897854	1	1	1	1	0.955859	1	0.862045	0.917397	1	1	0.951183	0.823603	1	0.82359	0.941743	0.874267	0.959469	1
5.33159	4.68057	90.4532	6.72336e-15	4.28368e-13	Arxes2	76976	X	135993824	135995355	0.947916	0.980869	1	1	0.904041	0.964208	1	1	0.968569	0.842411	1	1	0.987197	0.842412	1	0.989256	0.989002	0.985338	1	1	0.911917	0.981743	1	1	0.97254	0.984197	1	1	0.911146	0.863877	1	1	0.989281	0.973748	1	1	0.777743	0.798596	1	1
5.33205	5.91374	109.422	8.86761e-17	7.02229e-15	Piga	18700	X	164419787	164433916	0.93429	0.934437	0.996892	1	0.95538	0.97667	0.997333	0.996558	0.980612	0.819527	0.99697	1	0.98227	0.89249	1	1	0.978954	1	1	1	0.978312	0.965245	1	1	0.972242	0.980891	0.996975	0.996704	0.887649	0.91071	1	1	0.984516	0.970426	0.995849	0.99643	0.913457	0.838859	0.996867	1
5.33681	4.51849	120.242	9.08717e-18	8.67049e-16	Fgd1	14163	X	151046150	151089521	0.97153	0.956429	1	1	0.928025	0.981524	0.99369	0.984431	0.931785	0.835509	0.989845	1	0.972148	0.912102	0.990497	1	0.963448	0.973915	1	0.986517	0.975212	0.964141	0.981845	1	0.978711	0.972155	1	1	0.916215	0.826381	1	1	1	0.963921	1	1	0.895376	0.722801	1	0.991598
5.33811	6.27927	103.014	3.63727e-16	2.71546e-14	Tbl1x	21372	X	77511013	77662983	0.940749	0.944482	1	0.995892	0.935017	0.976581	0.99263	0.99721	0.973601	0.866687	0.997723	0.98846	0.976681	0.907321	1	0.997898	0.992742	0.971859	0.995404	1	0.943307	0.960069	0.992621	0.994163	0.982781	0.988425	0.995322	0.994848	0.900664	0.825642	0.997116	0.995884	0.961942	0.935806	0.996853	1	0.906679	0.807544	1	0.995539
5.34898	3.53174	111.767	5.35357e-17	4.43711e-15	Klhl15	236904	X	94234599	94277724	1	0.925473	0.956956	1	0.965217	1	1	1	1	0.887195	1	1	0.979422	0.958527	1	1	0.91916	1	1	1	1	0.982081	1	1	0.985609	0.959333	1	1	0.852248	0.856356	1	1	0.984008	0.971623	1	1	0.971229	0.810133	1	1
5.34997	1.30032	55.661	2.3858e-10	1.04166e-08	Slitrk4	245446	X	64264885	64276996	1	0.924414	1	1	1	1	1	1	1	1	1	1	1	1	1	1	1	1	1	1	0.805492	1	1	1	1	1	1	1	0.103716	0.840982	1	1	1	1	#NUM!	#NUM!	1	1	1	0.927791
5.3552	4.19142	118.089	1.41585e-17	1.26457e-15	Dlg3	53310	X	100767722	100818410	0.932897	0.986206	1	0.990097	0.962538	0.959849	0.979665	1	0.963271	0.942749	1	1	0.983339	0.973865	1	1	0.985334	0.881896	1	1	0.84391	0.902978	1	1	0.942279	0.973545	1	1	0.951196	0.943839	1	1	0.929211	0.972823	0.983942	1	0.938326	0.92859	1	1
5.35661	4.24578	91.2139	5.60071e-15	3.65166e-13	Zfp185	22673	X	72987339	73031543	0.962397	0.974425	1	1	0.902437	0.973212	1	1	0.922547	0.929663	0.977491	1	1	0.935987	1	1	1	0.961206	1	1	0.949405	0.930764	1	1	1	0.977949	0.990079	1	0.859522	0.827313	1	1	0.928519	0.949177	1	1	0.940507	0.886475	1	1
5.36725	5.37067	88.2419	1.14892e-14	7.17982e-13	Ocrl	320634	X	47912387	47965868	0.926573	0.962857	0.994845	1	0.945864	0.963029	1	1	0.982698	0.805424	1	1	0.96277	0.944384	1	1	0.992585	0.954202	1	0.982892	0.960828	0.936711	1	1	0.984788	0.9429	1	1	0.79969	0.668185	1	1	0.970127	0.919998	1	1	0.836362	0.74948	1	0.99173
5.37054	4.73525	144.553	8.27756e-20	1.16481e-17	Ctps2	55936	X	162901238	163032508	0.972459	0.963425	1	1	0.939838	0.944161	1	1	0.987752	0.936494	1	1	0.985814	0.97019	1	0.994571	0.98743	0.976607	1	1	0.956684	0.978495	0.994133	1	1	0.97419	1	1	0.808352	0.843748	1	1	0.938409	0.989851	1	1	0.947553	0.927765	1	1
5.38417	4.69075	155.048	1.2721e-20	2.12669e-18	Bcap31	27061	X	73686178	73716175	0.980483	0.965106	0.993183	0.984867	0.952474	0.972454	1	0.9677	0.98174	0.911681	1	1	0.984095	0.944746	1	0.993721	0.982238	0.991151	0.989342	1	0.944011	0.977139	0.990723	0.984737	1	0.993165	1	0.967892	0.866313	0.857015	1	1	0.967897	0.98214	0.983096	1	0.957455	0.850504	1	1
5.38793	4.18428	121.31	7.3066e-18	7.01773e-16	Taz	66826	X	74281912	74290151	0.962729	0.963001	1	1	0.910307	0.979295	1	1	0.962364	0.847434	1	0.989411	0.950565	0.934673	0.99214	1	0.964991	0.980924	1	1	0.945478	0.954422	1	0.990844	0.948795	0.977717	1	1	0.86835	0.803141	1	1	0.976202	0.96087	1	1	0.919425	0.851816	1	1
5.3897	1.29834	41.2921	6.46786e-08	2.41434e-06	Rhox2-ps		X	37682921	37683431	#NUM!	1	1	1	1	1	1	1	1	1	1	1	1	1	1	1	1	1	1	1	1	1	1	1	1	1	1	1	0.935817	0.934551	1	1	1	1	1	1	1	1	1	1
5.40627	0.690975	42.4158	2.01281e-08	7.73489e-07	Gm36995		X	7558602	7605381	1	1	1	1	1	1	1	1	1	1	1	1	1	1	1	1	1	1	1	1	1	#NUM!	1	1	1	1	1	1	1	1	1	1	1	0.861599	1	#NUM!	0.655385	0.825812	1	#NUM!
5.41243	1.6456	115.312	5.57278e-16	4.0673e-14	DXBay18	574405	X	73137232	73149450	0.850465	1	1	1	1	1	1	1	1	1	1	1	1	1	1	1	1	1	1	1	1	1	1	1	1	1	1	1	1	1	1	1	0.915023	1	1	1	1	0.904597	1	1
5.42054	3.62608	80.678	7.58921e-14	4.26566e-12	Pcsk1n	30052	X	7919822	7924410	0.978494	0.886874	1	1	0.984791	0.961568	1	1	1	0.710795	1	1	0.984095	0.982051	0.98507	1	1	0.987721	1	1	0.98745	0.911825	1	0.98783	0.705677	0.976992	1	1	0.639848	0.861018	1	1	0.87512	0.962879	1	1	0.856419	0.791352	1	1
5.43131	5.59884	121.81	6.5996e-18	6.45441e-16	Apex2	77622	X	150519519	150589868	0.964	0.94331	0.99633	1	0.941663	0.987633	0.992021	0.99563	0.993311	0.904792	1	1	0.979287	0.951439	1	1	0.995479	0.987772	1	1	0.979287	0.992039	1	0.996453	0.989348	0.96371	1	1	0.843622	0.798278	1	0.988831	0.966491	0.981716	1	1	0.92982	0.841643	1	1
5.43352	6.17463	95.7122	1.93268e-15	1.32643e-13	Pgrmc1	53328	X	36598206	36606079	0.972423	0.923833	1	0.997546	0.944666	0.96384	1	0.996533	0.983642	0.926595	0.995476	0.997918	0.987862	0.941917	1	1	0.975264	0.970549	0.995926	1	0.922109	0.953879	0.997022	0.99469	0.977061	0.961843	1	1	0.9309	0.871554	1	0.997657	0.95428	0.965286	1	1	0.876799	0.8022	1	1
5.43737	8.58809	44.6062	2.63849e-09	1.08195e-07	Uba1	22201	X	20658326	20683179	0.850605	0.890823	0.999443	0.997918	0.938116	0.95677	0.999565	0.997245	0.903229	0.759704	0.998447	0.995301	0.924834	0.872909	0.998912	0.998862	0.958085	0.918436	0.997926	1	0.909763	0.866038	0.996655	0.99643	0.765594	0.858361	0.996234	0.998204	0.756968	0.7295	0.997948	0.999108	0.84354	0.837471	0.998313	0.996752	0.853022	0.778114	0.99852	0.998331
5.44381	4.54302	115.773	2.29324e-17	1.99359e-15	Gla	11605	X	134588149	134601125	0.976757	0.929432	1	1	0.955312	0.973212	1	1	0.978526	0.951602	1	1	0.990789	0.906686	1	1	0.965715	0.96564	1	0.988444	0.895596	0.975601	1	1	0.990227	1	1	0.988343	0.91569	0.878978	1	1	0.967469	0.952671	1	1	0.91089	0.854625	1	1
5.44691	7.68459	69.9428	1.29825e-12	6.52794e-11	Morc4	75746	X	139821632	139871677	0.944402	0.942186	0.998827	0.998243	0.916492	0.964226	0.999008	0.999161	0.963545	0.839664	0.997008	0.997718	0.960469	0.898899	0.998029	0.998858	0.976285	0.983191	0.997021	0.998699	0.952449	0.961837	0.996863	0.998137	0.972153	0.966361	0.996979	1	0.924272	0.831632	0.999142	0.999415	0.965649	0.953283	0.997475	0.996465	0.881849	0.819506	0.999002	1
5.46869	7.32649	58.4878	3.40417e-11	1.55211e-09	Xiap	11798	X	42059679	42109656	0.970158	0.921819	1	1	0.903889	0.964883	0.998633	1	0.986902	0.853007	1	1	0.99412	0.905935	0.997812	0.998769	0.969388	0.98165	1	1	0.910656	0.93609	1	0.996559	0.9753	0.981663	0.998864	0.996108	0.845855	0.781693	1	1	0.958064	0.929494	0.997781	1	0.887944	0.792983	1	0.998874
5.47323	4.57095	105.565	3.12034e-16	2.35652e-14	Prickle3	54630	X	7657260	7668186	0.963376	0.908071	1	1	0.956841	1	1	1	0.967218	0.856745	1	1	0.989176	0.849852	0.990321	1	1	1	1	1	0.951215	0.958498	1	1	0.954286	0.988733	1	1	0.951895	0.952257	1	1	0.981239	0.993305	1	1	0.87458	0.709887	0.990576	1
5.48271	4.42729	165.215	2.24082e-21	4.2971e-19	Tmem185a	236848	X	70459753	70477180	0.968085	0.944818	1	0.990367	0.952705	0.980342	0.989272	1	0.951155	0.921858	1	1	0.905882	0.977943	1	1	0.991282	0.972451	1	1	0.973144	0.97984	1	1	0.976522	0.988233	1	1	0.967222	0.914405	1	0.99218	0.971509	0.993211	1	1	0.942276	0.927182	1	1
5.48795	5.07266	152.707	1.91764e-20	2.97691e-18	Ube2a	22209	X	36873900	36884222	0.964899	0.958418	1	0.992376	0.980266	0.97567	0.963758	1	0.991043	0.940226	1	0.984201	0.981981	0.933356	1	0.995196	0.960991	0.996163	1	1	0.983432	0.984268	1	0.991819	0.96989	0.981427	1	1	0.93183	0.916021	0.993558	1	0.965955	0.99382	0.995036	1	0.93221	0.937054	1	1
5.49883	8.93639	162.894	3.30934e-21	6.22411e-19	Morf4l2	56397	X	136732942	136743690	0.969997	0.954361	0.97753	0.967481	0.979361	0.988435	0.995165	0.995358	0.967982	0.89799	0.979883	0.960239	0.969727	0.954249	0.968976	0.964176	0.991238	0.985203	0.996044	0.993913	0.982433	0.985281	0.99251	0.995445	0.96733	0.974376	0.98177	0.973581	0.964055	0.953748	0.9951	0.992177	0.971756	0.980993	0.991996	0.995744	0.947587	0.872758	0.976332	0.977205
5.50103	5.83373	123.624	4.5727e-18	4.65844e-16	Vma21	67048	X	71815924	71839757	0.975	0.930959	0.995756	1	0.951285	0.966432	1	1	0.984117	0.865875	0.996286	1	0.966168	0.948525	1	0.992885	1	0.996862	1	1	0.96593	0.981185	1	1	0.993894	0.989156	1	0.994201	0.940047	0.941357	1	1	0.958014	0.985107	0.997707	0.996732	0.912739	0.82021	1	1
5.51597	1.5261	21.0574	2.30927e-05	0.000699215	Rhox12	382282	X	38104077	38110907	1	1	1	1	1	#NUM!	1	1	1	1	1	1	1	#NUM!	1	1	1	1	1	1	#NUM!	1	1	#NUM!	1	1	1	#NUM!	0.971726	1	1	1	0.8602	1	1	1	1	0.904597	1	1
5.53336	4.14298	102.059	4.50792e-16	3.32735e-14	Rab9	56382	X	166457253	166479867	0.984833	0.983662	0.993557	1	0.875737	0.945887	0.973163	1	0.994865	1	1	1	0.986187	1	1	0.994077	0.967717	0.977671	0.979788	1	0.946237	0.925425	0.979268	1	0.983099	0.968885	0.986394	1	0.931219	0.779041	1	1	0.821899	0.827549	1	1	0.981349	0.945869	1	1
5.54459	3.96784	115.348	2.50714e-17	2.16034e-15	Wdr44	72404	X	23693051	23806025	0.96856	0.95973	1	1	0.959413	0.935045	1	1	1	0.815633	0.986372	0.977183	0.985003	0.942885	0.984166	0.966412	0.984388	1	1	1	0.989264	0.962398	1	1	0.969604	1	1	0.984629	0.881663	0.908392	1	1	0.932048	0.958482	1	1	0.983321	0.831045	1	1
5.55112	6.02413	129.785	1.34703e-18	1.5056e-16	Thoc2	331401	X	41794991	41920674	0.945743	0.964933	1	1	0.935523	0.970504	0.996845	0.996495	0.963271	0.855043	0.994212	1	0.987102	0.929944	0.993939	0.997381	0.97485	0.981003	1	0.996392	0.983848	0.979356	0.994901	0.985929	0.967569	0.965322	0.997352	0.993954	0.858066	0.816379	1	0.996889	0.962061	0.968363	0.993962	0.993419	0.908	0.831208	0.997521	0.996901
5.55373	7.92521	51.8567	2.5645e-10	1.11719e-08	Amot	27494	X	145446425	145505181	0.935364	0.909865	0.999251	0.999344	0.927542	0.979695	1	0.998635	0.979114	0.846836	0.998437	0.99719	0.977791	0.841758	0.999127	1	0.928642	0.975665	1	0.995162	0.925504	0.936198	1	0.998646	0.982906	0.967034	1	0.997701	0.92106	0.830258	0.998114	0.999405	0.991511	0.95712	1	1	0.809618	0.776883	0.998005	0.995111
5.55612	5.35141	145.924	6.44894e-20	9.2751e-18	Tsr2	69499	X	151087094	151096543	0.975611	0.943174	1	1	0.956791	0.977542	0.992054	0.992186	0.963578	0.92678	0.995136	0.989131	0.986187	0.936136	0.99575	0.995601	0.972445	0.986229	1	0.994009	0.982969	0.982407	0.991983	0.992634	0.988166	0.968885	1	1	0.945398	0.881009	0.993933	0.994074	0.994521	0.989227	1	1	0.895894	0.790387	1	1
5.55813	6.05128	117.596	1.56804e-17	1.38783e-15	Rbmx	19655	X	57383530	57393036	0.970367	0.944635	0.995588	0.997675	0.945545	0.968215	0.996945	1	0.967532	0.888263	1	1	0.985338	0.926564	0.997618	0.996792	0.988002	0.986309	1	0.994578	0.963618	0.951024	1	1	0.970806	0.985445	0.993466	0.996813	0.904555	0.865397	0.993873	1	0.948221	0.95058	1	0.982929	0.923845	0.881691	0.997867	0.997928
5.57888	0.691206	52.3839	5.97855e-10	2.52027e-08	Nap1l3	54561	X	122394565	122397401	1	1	1	1	1	1	1	1	1	1	1	1	1	1	1	1	0.756154	1	1	1	1	1	1	1	1	1	1	1	#NUM!	0.514025	1	1	1	0.919441	1	1	1	0.791352	1	1
5.57925	3.87073	58.3661	3.52954e-11	1.60553e-09	Mir351	723910	X	53053255	53053353	1	0.944239	1	1	0.888456	0.972191	1	1	0.956763	0.852948	1	1	1	0.965871	1	1	1	0.893401	1	1	0.98466	0.919193	1	1	0.901453	0.918853	1	1	0.89375	0.821703	1	1	0.85948	0.850893	1	1	0.83023	0.798814	1	1
5.58456	6.92691	81.1497	6.72879e-14	3.85968e-12	Pgk1	18655	X	106187100	106203699	0.960684	0.879548	0.99704	1	0.965827	0.974981	0.991954	1	0.984763	0.773024	0.985972	1	0.983178	0.855507	0.991725	0.988854	0.959751	0.957034	0.99869	0.996462	0.970899	0.951183	0.995769	0.995064	0.930648	0.902113	0.982817	0.991512	0.933233	0.904423	1	0.994527	0.966705	0.960159	0.994859	0.997011	0.819511	0.730051	0.997042	1
5.58568	6.31122	118.381	1.33279e-17	1.19992e-15	Atp6ap1	54411	X	74297097	74304721	0.957894	0.93366	0.995513	0.997574	0.960038	0.990344	0.992649	0.997126	0.961799	0.845405	0.995953	0.99046	0.980615	0.940993	0.997727	1	0.986251	0.974516	1	0.996818	0.957006	0.95717	1	0.997517	0.970521	0.945452	0.994134	0.997636	0.916788	0.91569	1	0.998078	0.971715	0.980466	1	1	0.902695	0.828828	0.997875	0.993338
5.5881	4.68929	82.9727	4.2405e-14	2.50587e-12	Was	22376	X	8081453	8090498	0.930503	0.975876	1	1	0.970787	0.977883	0.992953	1	0.985267	0.797259	1	1	0.967017	0.991591	1	1	0.979831	0.958399	1	0.993615	1	0.972658	1	1	0.810392	0.900686	1	1	0.876267	0.86902	1	0.991052	0.905406	0.906617	1	0.995537	0.93529	0.825812	1	1
5.59925	2.55688	75.3175	4.01635e-13	2.11182e-11	A230072E10Rik	331547	X	151291974	151344846	0.966029	1	1	1	0.961038	1	0.943108	1	1	0.876961	1	1	1	0.921825	1	0.925751	0.964125	0.918038	1	1	1	1	1	1	1	1	1	1	0.906719	0.873018	1	1	1	1	1	0.805821	0.969116	0.841518	1	1
5.60404	2.12273	31.5552	4.00679e-07	1.41723e-05	Cldn2	12738	X	139800828	139811386	1	0.894368	1	1	1	1	1	1	1	1	1	1	#NUM!	#NUM!	1	1	1	#NUM!	1	#NUM!	1	1	1	1	1	0	1	1	0.60351	0.630808	1	1	1	0.930979	1	1	0.895376	1	1	1
5.61299	5.48807	182.646	1.34102e-22	3.01499e-20	Rpl39	67248	X	37082520	37085402	0.952662	0.971223	0.984983	1	0.964584	1	0.988459	0.988535	0.987565	0.923491	1	0.988329	0.980135	0.94902	0.988801	0.993074	0.950726	0.995556	1	0.993972	0.985994	0.964535	0.996225	0.982451	0.966367	0.982785	0.988827	0.99258	0.888444	0.875799	0.973094	0.97468	0.944727	0.944084	1	1	0.953288	0.853694	0.988651	0.996758
5.614	3.46517	100.169	6.91757e-16	5.0114e-14	Slc25a53	67062	X	136981116	137038302	0.912487	0.915389	1	1	0.979286	1	1	1	0.969204	0.778324	1	1	0.975018	0.960826	1	1	1	0.975437	1	1	1	0.968773	1	1	1	0.892516	1	1	0.82679	0.943372	1	1	0.932635	0.984932	1	1	0.931645	0.730393	1	1
5.61427	5.35232	145.214	7.33744e-20	1.04e-17	Emd	13726	X	74254687	74261548	0.974428	0.933825	0.994769	1	0.955312	0.980342	1	1	0.980358	0.885838	1	0.981581	0.97926	0.934621	1	1	0.9824	0.972059	1	1	0.979078	0.971531	0.983487	0.996109	0.966233	0.977116	1	0.995484	0.919041	0.91091	1	0.988509	0.95351	0.962044	1	0.995863	0.929546	0.869064	1	1
5.61521	7.16823	70.2004	1.20983e-12	6.09906e-11	Hdac6	15185	X	7930120	7947889	0.894837	0.952704	1	1	0.969692	0.977489	1	0.99885	0.96251	0.793055	1	0.997416	0.965817	0.939633	1	1	0.988932	0.990658	1	1	0.975832	0.969292	0.998841	0.998816	0.779272	0.927213	0.998537	1	0.88786	0.870281	1	0.998821	0.902245	0.9361	1	0.996	0.928575	0.816333	1	0.996133
5.61641	3.28027	94.3089	2.68549e-15	1.81132e-13	Tbc1d8b	245638	X	139684996	139753405	0.966029	0.941152	1	1	0.977873	0.971373	1	1	0.935168	0.855043	1	1	0.93455	0.947156	1	1	0.951549	0.926245	1	1	0.917556	0.938145	1	1	0.979128	0.969773	1	1	0.894151	0.741665	1	1	0.94993	0.940861	1	1	0.847782	0.797515	1	1
5.62662	4.56843	159.693	5.7013e-21	9.8688e-19	Txlng	353170	X	162778919	162829454	0.972278	0.991568	1	0.992537	0.957274	0.949624	1	0.98377	0.990841	0.951215	1	1	0.992163	0.963833	1	0.992043	1	0.991746	1	1	0.989666	0.984883	0.993141	1	0.980466	0.990543	1	1	0.915881	0.873018	0.98943	1	0.957185	0.992162	1	0.982929	0.95398	0.777703	0.993523	0.9819
5.62891	7.61681	80.8145	7.32921e-14	4.14333e-12	Brwd3	382236	X	108737016	108834372	0.961575	0.917576	0.998054	0.997158	0.954154	0.975641	0.998323	0.998196	0.966276	0.825889	0.999131	0.996295	0.970067	0.908721	0.998999	0.998948	0.989605	0.979836	0.996038	0.997759	0.962135	0.970266	0.999041	0.99567	0.981595	0.970688	1	0.996336	0.911615	0.897425	1	1	0.979145	0.984335	0.998894	0.989769	0.897336	0.823369	0.996063	0.991969
5.63123	1.89297	107.548	1.9472e-15	1.33172e-13	Drp2	13497	X	134404551	134456573	0.929926	1	1	1	0.877964	1	1	1	0.967218	1	1	1	0.916297	0.929612	1	1	0.95596	1	1	1	1	1	1	1	1	1	1	1	0.80642	0.920854	1	1	1	1	1	1	1	1	1	1
5.63762	3.12938	100.702	6.12834e-16	4.45615e-14	Prrg3	208748	X	71962624	71972722	0.985153	0.984609	1	1	0.909261	0.940959	1	1	0.983604	0.976076	1	1	1	0.861095	1	1	0.962744	1	1	1	1	0.961268	1	1	1	1	1	1	0.639052	0.529151	1	1	0.891353	0.823603	1	1	0.949444	0.917096	0.98713	0.9819
5.64182	5.55233	131.978	8.79418e-19	1.03623e-16	Ubl4a	27643	X	74365718	74373218	0.953508	0.942479	1	0.992403	0.973139	0.980845	0.995632	0.996125	0.977496	0.833859	0.995771	1	1	0.955774	1	1	0.983663	0.983961	1	1	0.955844	0.97374	1	1	0.977354	0.975274	1	0.995703	0.933598	0.892305	0.995501	1	0.97804	0.987477	1	1	0.891522	0.819605	0.99597	1
5.64508	1.27368	14.8619	0.000378858	0.0100277	Gm14651		X	60614810	60615251	#NUM!	#NUM!	1	#NUM!	1	1	1	1	#NUM!	1	#NUM!	1	1	#NUM!	#NUM!	#NUM!	1	1	1	1	1	1	1	1	#NUM!	1	1	1	1	1	1	1	1	1	1	1	1	#NUM!	1	#NUM!
5.64956	0.94856	65.0522	8.46348e-11	3.77097e-09	Gm15152		X	151005870	151006528	1	1	1	1	1	1	1	1	1	0.746791	1	1	1	1	1	1	1	1	1	1	1	1	1	1	1	1	1	1	1	1	1	1	1	1	1	1	1	1	1	1
5.66806	7.23954	112.711	4.37702e-17	3.65874e-15	Wnk3	279561	X	151198078	151320152	0.970777	0.942468	1	0.992265	0.951487	0.979222	0.992422	0.996361	0.985951	0.903418	0.998755	0.989717	0.990268	0.943104	0.996925	0.998832	0.978195	0.976	1	1	0.979213	0.968923	1	0.99567	0.987091	0.989552	0.999011	0.99597	0.949508	0.924408	0.994819	0.999058	0.96165	0.981774	0.99822	0.998282	0.945474	0.872933	0.994312	0.997838
5.67881	4.79115	124.058	4.19101e-18	4.31453e-16	Vbp1	22327	X	75514299	75534942	0.98585	0.955205	1	1	0.949478	0.991894	0.991677	0.979477	0.98227	0.869507	0.993	1	1	0.951947	0.974676	1	1	0.974546	1	1	0.972637	0.932521	0.994237	0.995096	0.971244	0.98306	1	1	0.840807	0.886503	1	1	0.975453	0.925655	1	1	0.903299	0.826799	1	0.992951
5.68431	2.5867	130.987	5.587e-18	5.60419e-16	Mtm1	17772	X	71210767	71315691	0.976585	0.952889	1	1	1	0.959431	1	1	1	0.917081	1	0.981985	1	0.942885	1	1	1	1	1	1	1	1	1	1	1	0.937879	1	1	0.862045	0.725598	1	1	0.911152	0.919441	1	1	0.953367	0.976592	1	1
5.69849	3.53472	80.4166	8.11385e-14	4.53448e-12	Alas2	11656	X	150547375	150570638	0.961007	0.984383	0.959434	1	0.968586	0.981287	1	1	0.941953	0.923331	1	1	0.977673	0.908301	1	1	0.979402	0.959049	1	1	0.96418	0.873322	1	1	0.963949	1	1	1	0.596236	0.607211	1	0.967288	0.966917	0.943185	1	1	0.813923	0.813491	1	1
5.70708	0.892624	68.8074	1.67598e-11	7.88034e-10	Syp	20977	X	7638471	7653256	1	1	1	1	1	1	1	1	1	1	1	1	1	1	1	1	1	1	1	1	0.892269	1	1	1	1	1	1	1	0.675632	0.840982	1	1	1	1	1	1	0.883818	1	1	1
5.71428	0.709022	47.8289	7.89854e-09	3.11483e-07	Igsf1	209268	X	49782536	49797749	1	1	1	1	1	1	1	1	1	1	1	1	1	1	1	1	1	1	1	#NUM!	1	1	1	1	0	1	1	1	#NUM!	1	#NUM!	#NUM!	1	0.509218	1	1	1	1	1	1
5.71447	6.47742	87.3588	1.42587e-14	8.85395e-13	Shroom2	110380	X	152609509	152769465	0.962112	0.93984	1	1	0.946163	0.983188	1	1	0.990409	0.897889	1	0.993529	0.991322	0.903204	0.997857	0.997936	0.988798	0.984809	1	1	0.966321	0.956852	1	1	0.985268	0.970543	1	1	0.835083	0.789771	0.995726	1	0.965755	0.952671	1	1	0.883818	0.841073	1	1
5.71619	4.58694	123.278	4.90292e-18	4.94336e-16	Fancb	237211	X	164980592	164997272	0.96683	0.925734	1	1	0.969804	0.984307	1	1	0.993838	0.913923	1	1	1	0.940836	0.99208	1	0.968247	0.990464	1	1	1	0.959313	1	1	0.961334	1	1	1	0.921361	0.846711	1	0.991462	0.94993	0.981453	0.98765	0.977031	0.891569	0.777927	1	0.990706
5.7185	6.02992	154.196	1.47633e-20	2.40642e-18	Hprt	15452	X	52988137	53021659	0.98024	0.946753	1	1	0.96734	0.969294	1	0.993188	0.9769	0.907673	1	0.994799	0.993749	0.973952	0.997732	1	0.982714	0.985804	0.994296	1	0.970314	0.962657	1	0.99765	0.99199	0.990515	1	0.992973	0.960859	0.92256	1	0.994495	0.989192	0.993801	0.996267	1	0.955583	0.863411	0.994875	1
5.72515	5.11168	139.438	2.12951e-19	2.75849e-17	Msl3	17692	X	168654117	168673898	0.96059	0.939344	1	1	0.959413	1	1	1	0.977904	0.870929	1	1	0.975369	0.926352	0.993957	0.994788	0.972134	0.959262	1	1	0.994633	0.981914	1	0.994719	0.975365	0.987164	1	1	0.940179	0.905497	1	1	0.944986	0.988981	0.994766	1	0.933597	0.85789	0.994102	0.98279
5.73524	1.00073	16.1594	0.000180983	0.00496498	Xlr3e-ps		X	74912417	74920320	#NUM!	#NUM!	#NUM!	#NUM!	1	1	1	1	#NUM!	#NUM!	0	0	#NUM!	#NUM!	#NUM!	#NUM!	1	1	1	1	1	1	1	1	0	0	#NUM!	0	1	1	1	1	0.754694	1	1	1	#NUM!	#NUM!	0	#NUM!
5.73683	5.97519	120.165	9.23287e-18	8.76675e-16	Alg13	67574	X	144317804	144374450	0.965728	0.95531	1	1	0.943913	0.987801	0.996856	1	0.997585	0.91368	1	1	0.97915	0.931949	0.997151	0.997625	0.99664	0.990555	1	0.99671	0.960756	0.979411	1	1	1	0.980457	1	0.997532	0.926212	0.861317	1	1	0.962009	0.975622	0.996962	1	0.940591	0.839972	1	1
5.74084	2.33105	77.2151	3.31067e-13	1.75969e-11	Dnase1l1	69537	X	74273217	74282337	0.952167	0.955825	1	1	1	1	1	1	1	0.866898	1	1	1	0.882997	1	1	1	1	1	1	1	1	1	1	0.951696	1	1	1	0.903597	0.826381	1	1	0.94861	1	1	1	0.895376	0.845011	1	1
5.74855	5.24374	129.484	1.42878e-18	1.5879e-16	Hsd17b10	15108	X	152001845	152004442	0.976842	0.953234	0.993596	1	0.965354	0.969476	0.992658	1	0.987703	0.904977	1	1	0.993894	0.916843	0.994255	1	0.983867	0.984307	1	1	0.945324	0.978963	1	0.995803	0.974202	1	1	1	0.91166	0.798251	1	0.982262	0.951623	0.963442	0.991323	1	0.91136	0.777214	0.994231	1
5.7538	6.47489	118.826	1.21571e-17	1.10601e-15	Mmgt1	236792	X	56585512	56598069	0.961382	0.958865	1	1	0.975176	0.945432	0.994851	1	0.966904	0.893709	1	0.992715	0.98933	0.951947	1	1	0.990761	0.969672	1	1	0.984304	0.977772	0.99289	0.997911	0.981617	0.982056	0.997977	0.997543	0.927868	0.905585	0.997734	1	0.97191	0.979822	1	1	0.936661	0.867952	0.994241	0.99796
5.75921	4.06755	75.2551	3.10707e-13	1.65597e-11	Tceanc	245695	X	166499812	166518567	0.974915	1	1	1	0.966026	0.935045	1	1	0.957663	0.930292	1	0.996482	1	0.920853	1	1	1	0.945386	1	0.915401	0.978986	0.956958	1	1	0.954448	1	1	1	0.973049	0.982365	1	0.991873	0.934257	0.989851	1	1	0.946212	0.895109	1	1
5.76095	2.86268	51.2779	3.61415e-10	1.54015e-08	Car5b	56078	X	163976822	164027997	1	0.738376	1	1	1	0.942699	1	1	1	0.864685	1	1	1	1	1	1	1	0.988165	1	1	0.79733	1	1	1	0.867854	1	1	1	0.975355	1	1	1	1	1	1	1	1	0.819862	1	1
5.77206	8.2348	71.7785	7.87559e-13	4.05386e-11	Hcfc1	15161	X	73942792	73966357	0.942237	0.944148	0.997529	0.996891	0.945275	0.957824	0.995887	0.998187	0.954367	0.819285	0.996914	1	0.96459	0.93654	0.997554	0.998794	0.94972	0.938975	1	1	0.931865	0.93666	0.994004	0.995898	0.902709	0.917955	0.998566	0.998739	0.886982	0.872385	0.999253	0.996185	0.926715	0.90955	0.997967	0.997901	0.911474	0.814463	0.996704	0.996006
5.77649	2.93626	123.949	1.18493e-17	1.08305e-15	Slc25a14	20523	X	48623413	48662294	0.974304	0.957588	1	1	1	0.950055	1	1	0.981176	0.811359	0.981832	1	1	1	1	1	1	1	1	1	0.974559	0.972345	1	1	1	0.954043	1	1	1	0.781172	1	1	0.977826	0.907892	1	1	0.919425	0.897654	1	1
5.78138	3.81449	107.873	1.24178e-16	9.75471e-15	Zfp182	319535	X	21028939	21062316	0.956743	0.962785	1	1	0.933913	1	1	1	0.984828	0.86003	1	1	0.960183	0.954031	0.982869	1	1	0.944616	0.989791	1	0.946829	0.984139	1	1	0.879097	0.97419	1	1	0.827786	0.849993	1	1	0.884943	0.844894	1	0.979476	1	0.810133	1	1
5.78672	3.94983	130.688	1.12935e-18	1.30711e-16	Tmem29	382245	X	150397773	150459154	0.98913	1	1	1	0.915717	0.962068	1	1	0.964134	0.907673	1	1	1	0.903059	0.977771	1	0.964563	0.885566	1	1	0.894875	0.93539	1	0.979963	0.98521	0.937879	1	1	0.888697	0.826381	1	1	0.986452	0.964907	1	1	0.962951	0.861921	1	1
5.79097	5.67066	165.611	2.09723e-21	4.10218e-19	Rap2c	72065	X	51003912	51018018	0.977339	0.947346	0.990892	1	0.966417	0.984432	1	0.99567	0.940247	0.911999	0.995905	1	0.983851	0.936625	0.996479	1	0.979619	1	1	1	0.9538	0.973391	0.991675	0.993655	0.988423	0.985943	1	0.989444	0.919468	0.924348	0.997306	0.985633	0.987756	0.964421	1	0.992287	0.916877	0.847807	0.996256	0.985666
5.80287	3.92594	113.5	3.7017e-17	3.12092e-15	Rpgr	19893	X	10073621	10216920	0.957894	0.955079	1	1	0.969248	1	1	1	0.961412	0.830953	1	1	0.981586	0.871665	1	1	0.961252	1	1	1	0.946975	0.968773	1	0.98988	0.988788	0.912124	1	1	0.921894	0.836643	1	1	0.92401	0.936301	1	1	0.873321	0.875679	1	1
5.80481	5.40288	123.927	4.30242e-18	4.40604e-16	1810030O07Rik	69155	X	12654879	12673668	0.985153	0.961952	1	1	0.958326	0.954114	1	0.989244	0.981349	0.852171	1	0.98133	0.987839	0.965625	1	0.996036	0.984218	0.964587	1	1	0.964346	0.960744	1	0.994914	0.895188	0.942233	1	0.991443	0.809105	0.756951	1	1	0.880897	0.888522	1	1	0.94777	0.910659	0.996359	1
5.80487	3.41248	155.342	2.27839e-20	3.48166e-18	Xk	22439	X	9272756	9313250	1	1	1	1	0.935017	0.936111	1	1	1	1	1	1	1	0.975941	1	1	0.986557	0.962915	1	1	0.913495	0.959652	1	0.97128	1	0.959333	1	1	0.757539	0.835446	1	1	1	0.959781	1	1	0.982191	0.93109	1	1
5.81405	5.48066	130.029	1.28419e-18	1.4604e-16	Hnrnph2	56258	X	134601179	134607060	0.965892	0.952602	1	0.995584	0.961719	0.98927	0.996169	0.995962	0.989299	0.8325	0.99509	1	0.989706	0.934756	1	0.995745	0.977308	0.987352	1	1	0.986671	0.954836	1	0.99691	0.972362	0.977949	1	0.995154	0.890113	0.907135	0.994532	1	0.984876	0.971899	0.994368	1	0.909473	0.816333	1	1
5.82331	1.16589	19.4072	5.13059e-05	0.00150006	Nr0b1	11614	X	86191764	86195947	1	1	#NUM!	1	1	1	1	1	1	#NUM!	1	#NUM!	#NUM!	1	1	0.958365	1	1	1	1	1	#NUM!	1	1	1	1	1	1	1	1	1	1	1	1	1	1	1	0.654741	1	1
5.83289	5.58857	133.206	6.93899e-19	8.22586e-17	Diaph2	54004	X	129749742	130465834	0.969905	0.946123	1	1	0.958674	0.981524	0.994998	1	0.981349	0.896738	1	1	0.994926	0.936939	1	1	0.978293	1	1	1	0.96442	0.994744	1	0.995962	0.99196	0.982644	1	1	0.933297	0.881772	1	0.987698	0.978124	0.977033	0.995562	1	0.944558	0.895109	1	0.988067
5.83788	6.89521	110.089	7.67803e-17	6.15501e-15	Nup62cl	279706	X	140006805	140062712	0.952076	0.955902	1	0.995559	0.959881	0.980988	0.993751	1	0.985347	0.873124	0.997184	1	0.961301	0.932763	1	0.998218	0.983116	0.982226	0.994318	0.994302	0.957559	0.971343	0.996863	0.99858	0.979914	0.976164	0.99683	1	0.921608	0.897269	0.99708	0.99673	0.964455	0.972484	0.996795	1	0.940795	0.851041	0.998461	0.998394
5.84754	1.35571	39.6118	1.87028e-08	7.21551e-07	Mir503	723879	X	53053984	53054054	1	1	1	1	1	1	1	1	1	0.551344	1	1	1	0.825076	1	1	1	0.859343	1	1	1	0.943006	1	1	1	1	1	1	0.829356	0.873018	1	1	0.955626	0.878978	1	1	0.74044	1	1	1
5.85518	4.94516	125.983	2.85134e-18	2.99851e-16	Brcc3	210766	X	75416628	75454001	0.988843	0.965963	1	1	0.91985	0.99234	0.994838	1	0.990033	0.916839	1	1	1	0.951116	0.994497	0.994839	0.973288	1	1	1	0.983337	0.908487	1	0.99114	0.986519	0.987006	1	0.99311	0.809269	0.778484	1	1	0.958986	0.90238	1	1	0.932377	0.878013	0.99485	1
5.85973	4.30684	164.347	2.59145e-21	4.92124e-19	Zxdb	668166	X	94724569	94730187	0.989241	0.947541	1	1	0.969085	0.947352	1	1	1	1	1	0.990577	1	0.990706	1	1	0.986921	1	1	1	0.976706	1	1	1	1	1	1	1	0.984419	0.956351	1	0.984737	0.990711	0.979331	0.993943	1	0.976483	0.916299	1	1
5.86421	2.03272	91.4832	3.60867e-14	2.152e-12	Cfap47	636104	X	79266559	79517285	1	1	1	1	1	1	1	0.963137	1	1	1	1	1	1	1	1	1	1	1	1	1	1	1	1	0.894111	1	1	1	0.935817	0.787325	1	1	1	1	1	1	0.895376	0.716594	1	1
5.8683	4.7584	154.143	1.48995e-20	2.40855e-18	Rbmx2	209003	X	48695004	48710723	0.987143	0.906228	1	1	0.976444	1	1	0.992343	0.982062	0.941374	1	1	0.993091	0.992936	1	1	0.993462	0.968555	1	1	0.978399	1	1	1	0.994536	1	0.995038	0.994355	0.91166	0.909488	1	1	0.983083	1	1	1	0.95774	0.895719	1	1
5.87921	5.67884	110.73	6.68788e-17	5.42801e-15	Maoa	17161	X	16619698	16687818	0.972688	0.96182	1	0.997196	0.966987	0.967909	0.990097	1	0.96635	0.95803	1	1	1	0.930674	0.993486	0.993795	0.991436	0.97995	0.994869	1	0.968165	0.965216	0.993592	0.995334	0.952503	0.955208	0.993061	1	0.973422	0.935709	1	0.997951	0.977826	0.985315	1	1	0.942276	0.841518	1	1
5.88162	5.08881	127.338	2.17913e-18	2.32916e-16	Map3k15	270672	X	159988433	160123351	0.989017	0.966674	1	1	0.905593	0.984797	1	1	0.975509	0.892608	0.994147	1	1	0.941663	1	1	0.993837	1	1	1	0.956248	0.97984	1	0.994346	0.980286	1	0.99447	0.99472	0.896682	0.894311	1	1	0.979674	0.981453	1	1	0.927564	0.81306	1	0.994695
5.88242	2.35486	42.6388	1.08262e-08	4.21835e-07	AU022751	102991	X	6081219	6083419	1	1	1	1	1	1	1	1	1	#NUM!	#NUM!	1	1	1	1	1	1	1	1	0.891823	1	1	1	1	0.960619	1	1	1	1	0.972148	1	1	1	1	0.991081	1	0.791822	1	1	1
5.90439	5.90352	150.716	2.72739e-20	4.13549e-18	Dkc1	245474	X	75095854	75109777	0.980535	0.973094	1	0.994633	0.953048	0.977034	1	0.991272	0.99541	0.885379	1	1	0.996883	0.947705	1	0.997476	0.989509	0.997194	0.997269	0.996406	0.983337	0.98838	1	0.9973	0.988788	1	1	1	0.905275	0.906812	1	1	0.994229	0.972321	0.995414	0.993162	0.942734	0.838607	0.997236	0.997213
5.90769	5.84202	158.512	6.98149e-21	1.19788e-18	Cenpi	102920	X	134308084	134362639	0.971721	0.956725	0.996546	1	0.958067	0.982989	0.996425	1	0.994383	0.87969	0.99387	1	0.98221	0.97519	1	1	0.96945	0.993842	0.993556	0.989214	0.970611	0.987186	0.996956	0.997165	0.991048	0.987292	1	1	0.906719	0.905256	1	0.99649	0.983238	0.970982	0.995954	1	0.941912	0.854811	1	0.994668
5.91339	1.33376	69.6825	1.36586e-11	6.45321e-10	Glra4	14657	X	136757674	136780141	1	1	1	1	1	1	1	1	1	1	1	1	1	0.904155	1	1	1	1	1	1	1	1	1	1	1	1	1	1	1	0.913623	1	1	1	1	1	1	1	0.791352	1	1
5.9144	3.59739	207.06	1.93768e-23	4.9222e-21	Xlr4c	72891	X	73233688	73243130	0.978924	0.975876	1	0.97794	1	1	0.951656	1	1	0.941091	1	1	1	1	1	1	0.977484	1	1	1	0.973144	1	0.982285	1	0.987012	0.988852	0.968196	0.970966	0.919718	0.831537	1	1	0.988525	0.98214	1	0.984692	1	1	1	1
5.92377	4.46483	129.888	1.32004e-18	1.49248e-16	Fundc2	67391	X	75382399	75396459	0.985153	0.931699	1	1	0.980912	0.991756	0.992795	0.990427	0.973715	0.824711	1	0.979256	1	0.955941	1	1	0.984876	0.993408	1	1	0.971352	0.983025	0.993507	0.994379	0.95571	0.935023	1	0.990854	0.874885	0.834002	1	0.971469	0.982262	0.974834	1	1	0.89938	0.764131	1	1
5.92769	7.3683	94.9102	2.33169e-15	1.57812e-13	Shroom4	208431	X	6399854	6637448	0.958254	0.955068	0.997525	0.998717	0.957966	0.978039	0.997593	1	0.978163	0.828424	1	0.997293	0.982775	0.946282	1	0.997625	0.97972	0.984389	0.996404	0.998824	0.967692	0.942451	0.998924	0.998865	0.901621	0.93094	0.998745	1	0.899564	0.8726	0.997355	0.997751	0.924952	0.946134	0.996822	0.997858	0.934802	0.852421	0.997561	0.998826
5.93127	1.87427	42.5924	1.09835e-08	4.27111e-07	Mamld1	333639	X	71050256	71156056	1	0.981372	1	1	0.961038	0.986101	1	1	1	1	1	1	#NUM!	0	1	1	1	#NUM!	1	#NUM!	1	0.949016	1	1	1	#NUM!	1	1	1	1	1	1	#NUM!	1	1	1	1	0.83272	1	1
5.93449	1.31353	78.6057	1.06259e-12	5.37059e-11	Gm14644		X	54094373	54096289	1	1	1	1	1	1	1	1	1	0.843922	1	1	0.93455	1	1	1	1	1	1	1	1	1	1	1	1	1	1	0.849674	1	1	1	1	1	1	1	1	1	0.912511	1	1
5.93894	6.31779	121.302	7.3191e-18	7.01773e-16	Bcorl1	320376	X	48341358	48408049	0.98726	0.980695	0.997971	0.99811	0.922806	0.977072	0.995719	1	0.997359	0.825553	0.997881	1	0.98912	0.982239	1	1	0.976948	0.980113	1	0.991945	0.987046	0.974943	1	0.99743	0.977422	0.984916	0.997058	0.99778	0.944634	0.936741	1	1	0.986452	0.953926	1	0.997198	0.946862	0.920432	0.998243	0.996539
5.93921	6.68249	118.709	1.24546e-17	1.12784e-15	Cstf2	108062	X	134059187	134086819	0.973749	0.952752	1	1	0.956742	0.979222	0.998304	0.994712	0.993472	0.840047	1	1	0.996139	0.953877	1	0.998187	0.983867	0.983948	0.996639	1	0.9766	0.976318	0.994707	1	0.968049	0.973133	0.99785	1	0.922939	0.875392	1	0.995893	0.956289	0.946066	1	0.996514	0.909253	0.843455	0.995908	0.997964
5.94711	5.68368	134.749	5.16315e-19	6.27275e-17	Gpkow	209416	X	7697131	7710262	0.963055	0.953544	1	1	0.971076	0.981698	1	1	0.971543	0.794221	1	1	0.979914	0.967656	1	0.995408	0.986681	0.991993	1	1	0.97635	0.976323	1	1	0.940005	0.982256	1	1	0.918004	0.91464	0.996239	1	0.954893	0.989085	1	1	0.935817	0.80806	0.991622	1
5.95692	4.14994	182.28	2.98875e-22	6.49555e-20	Pfkfb1	18639	X	150588229	150643878	0.987597	0.978112	1	0.988963	0.966799	0.976263	0.988079	1	0.989069	1	1	1	0.952787	0.936625	1	0.98829	1	1	1	1	1	0.975601	1	1	0.988033	1	1	1	0.980971	0.857464	1	1	0.978943	0.971199	1	1	0.932377	0.822141	0.989339	0.981743
5.96143	5.12467	129.803	1.34218e-18	1.5056e-16	C330007P06Rik	77644	X	36823737	36874111	0.976322	0.969435	1	1	0.957908	0.965962	1	1	0.992686	0.866056	1	1	0.995849	0.95234	1	1	0.960803	0.984651	1	1	0.961531	0.969906	1	1	0.982255	0.975947	1	1	0.820027	0.828629	1	1	0.948221	0.932784	1	1	0.967904	0.882021	1	1
5.97138	7.64641	102.672	3.92814e-16	2.91039e-14	Nono	53610	X	101429318	101448591	0.987471	0.965758	0.995137	0.996609	0.922361	0.962703	0.996278	1	0.98409	0.919585	0.996196	0.995266	0.984158	0.971005	0.996714	0.996999	0.971878	0.983762	1	0.996981	0.93377	0.943432	0.996501	0.996624	0.982983	0.985338	0.996753	0.991606	0.853024	0.795915	0.998339	0.991193	0.964853	0.967238	0.994766	0.998326	0.948035	0.889388	0.995789	0.998107
5.97154	5.46114	162.433	3.57781e-21	6.60208e-19	Abcb7	11306	X	104280657	104413856	0.97636	0.974114	1	0.995907	0.961479	0.970758	1	0.995191	0.98494	0.925095	1	1	0.992221	0.953107	1	1	0.995541	1	1	1	1	0.97859	1	1	0.991048	0.991423	0.995594	1	0.902123	0.878223	1	1	0.986576	0.959405	1	1	0.965134	0.89298	1	1
5.97401	3.58153	149.512	3.38024e-20	5.00889e-18	Phka2	110094	X	160502166	160598878	0.986985	1	1	1	0.933537	0.942699	1	1	1	0.978816	1	1	1	0.988965	0.969728	0.987291	1	0.981107	1	1	0.982102	1	0.983202	1	1	1	1	1	0.797341	0.856108	1	1	1	0.947801	1	1	0.966669	0.910387	1	1
5.97504	3.71034	124.468	6.36495e-18	6.2562e-16	Xlr4a	434794	X	73074345	73082478	1	0.968794	0.91233	1	1	0.984556	1	1	1	0.916513	0.965501	1	0.895477	1	1	1	1	0.989086	1	1	1	1	1	1	0.929253	0.959333	0.981707	1	0.983852	0.966169	1	1	0.962095	1	1	1	1	0.981185	1	1
5.98416	3.21354	140.642	1.70123e-19	2.24839e-17	Gspt2	14853	X	94636069	94643244	0.949895	1	1	1	0.924998	1	1	1	0.963708	0.918737	1	1	0.97086	0.933995	1	1	1	0.970668	1	1	1	1	0.982602	1	1	1	1	1	0.892838	0.760373	1	1	0.980488	0.972434	1	1	0.888734	0.866297	1	1
5.99748	4.87129	138.476	2.5498e-19	3.28119e-17	Pdzd11	72621	X	100622883	100626568	0.949656	0.985839	1	0.994144	0.958012	1	1	1	0.971505	0.96109	1	1	0.97282	0.941708	0.994468	1	0.987095	0.992724	1	0.989993	0.97439	0.926371	0.994764	1	0.924758	0.971785	0.992678	1	0.932823	0.853857	0.992029	0.992897	0.933263	0.943185	0.990171	0.992224	0.9448	0.829336	1	1
6.00281	5.25808	119.656	1.02491e-17	9.63814e-16	Fundc1	72018	X	17556564	17572325	0.986249	0.972554	1	1	0.966417	0.951306	1	0.995309	0.973371	0.855899	0.994846	1	0.994354	0.941841	1	1	0.972952	1	0.994329	1	0.966797	0.977804	0.990981	1	0.92368	0.960099	1	1	0.760354	0.780896	1	1	0.908844	0.875582	1	1	0.92773	0.865861	0.995843	1
6.01082	6.31202	128.405	1.76546e-18	1.90787e-16	Zbtb33	56805	X	38189793	38197046	0.966445	0.938729	0.997159	0.997225	0.982572	0.983828	1	1	0.985507	0.884135	1	0.994927	0.992124	0.936805	1	1	0.979737	0.982066	1	1	0.972572	0.989881	0.99795	1	0.99248	0.983015	0.997249	1	0.920786	0.909716	1	1	0.978518	0.988549	0.997846	1	0.94002	0.870933	1	1
6.01155	5.69046	186.166	7.76913e-23	1.78781e-20	Rnf128	66889	X	139563316	139673145	0.982506	0.97106	0.996569	0.991242	0.953385	0.981727	0.995245	1	0.958185	0.926249	1	0.996301	0.97926	0.948691	1	1	0.993837	1	0.995728	1	1	0.973723	0.996254	0.991261	0.982687	0.985361	1	1	0.979792	0.972685	0.992205	1	0.960482	0.991195	0.991974	0.993529	0.968749	0.905773	1	1
6.01564	6.14816	144.2	8.82878e-20	1.2267e-17	Zfx	22764	X	94074631	94123702	0.974674	0.963245	0.991548	1	0.952678	0.997197	0.997405	0.997455	0.974299	0.878654	0.99446	0.995255	0.988366	0.944991	1	0.997299	0.990298	0.984964	0.99549	1	0.971368	0.968688	0.995553	1	0.974434	0.961076	0.994412	0.997386	0.884994	0.914663	0.996855	0.997296	0.98365	0.970493	0.994018	1	0.92322	0.828811	0.994501	0.997367
6.02878	3.2105	126.851	3.99937e-18	4.18329e-16	Armcx5	494468	X	135742733	135747322	1	0.95391	1	1	0.979286	0.970504	1	1	0.960152	0.952727	1	1	1	0.980391	1	0.978297	1	1	1	1	0.913495	1	1	1	1	0.974803	1	1	0.757539	0.881009	1	1	1	1	1	1	1	0.837724	1	1
6.03382	2.81419	110.746	6.66449e-17	5.42801e-15	C1galt1c1	59048	X	38630785	38635087	1	0.937703	1	1	0.927782	1	1	1	0.960918	0.726356	1	1	0.879489	0.965871	1	1	1	0.962202	1	1	0.689296	0.944637	0.944269	0.954154	0.944095	0.959333	1	1	0.919718	0.690686	1	1	1	0.966724	0.968902	1	0.850866	0.858525	1	0.978579
6.04468	4.3046	155.826	1.11077e-20	1.873e-18	Nsdhl	18194	X	72918557	72958514	0.975779	0.937703	1	0.98796	0.973684	0.989651	1	1	1	0.882865	1	1	1	0.975382	1	1	0.978486	0.991459	1	0.97934	0.99145	0.969749	0.99195	1	0.974357	0.967944	0.973488	0.990085	0.895935	0.950424	1	0.993401	0.963399	0.978565	1	0.97647	0.96183	0.793299	1	1
6.07462	6.15017	204.426	5.11171e-24	1.44906e-21	Nxf7	170722	X	135579555	135598777	0.983783	0.946574	1	0.991385	0.981731	0.987365	1	0.990131	0.992219	0.936313	0.990873	1	0.991839	0.967276	0.997333	0.997457	0.985016	0.997495	1	1	0.980669	0.971723	0.994874	1	0.957477	0.988145	1	0.993569	0.958852	0.963747	0.994657	1	0.956389	0.979257	0.987121	0.997553	0.959372	0.852725	0.994231	0.994876
6.09067	7.1699	160.447	5.01288e-21	8.75463e-19	Cul4b	72584	X	38533274	38576196	0.964595	0.967318	0.995951	0.998861	0.976721	0.972583	0.99471	1	0.983244	0.911296	1	0.993279	0.989272	0.96412	0.993936	0.997589	0.979105	0.976325	0.997517	0.990843	0.973902	0.989069	0.988902	0.998818	0.958449	0.970824	0.994527	1	0.910191	0.915001	0.987667	0.995686	0.946288	0.941012	0.998462	0.998143	0.963586	0.88726	0.99254	0.991185
6.09078	2.06014	74.4249	6.72408e-13	3.47944e-11	Eras	353283	X	7924276	7928607	1	0.911882	1	1	1	1	1	1	1	0.849688	1	#NUM!	0.93455	1	1	1	1	1	1	1	0.951622	1	1	1	0.484058	#NUM!	1	1	0	0.760373	1	1	#NUM!	0.75685	1	1	1	0.860398	1	1
6.10763	5.32641	119.356	1.09013e-17	1.01057e-15	Araf	11836	X	20797814	20860519	0.972033	0.955205	1	1	0.952763	1	0.994607	1	0.982245	0.88439	1	0.992306	0.992363	0.965393	1	1	0.975173	0.960689	1	1	0.944433	0.933686	0.995891	1	0.863628	0.907925	0.994968	0.996237	0.813579	0.728228	0.982679	0.995484	0.896173	0.86899	1	1	0.914263	0.86487	0.995507	1
6.11534	6.90481	186.882	6.9586e-23	1.62036e-20	Rhox5	18617	X	37804842	37808876	0.965246	0.975967	0.997936	1	0.980161	0.973989	0.996224	0.993489	0.970754	0.940335	0.994566	1	0.997696	0.987339	0.998042	1	0.974448	0.987955	1	0.996559	0.959958	0.985958	0.993584	0.989986	0.956401	0.955074	1	0.995335	0.95164	0.936826	0.998256	0.997493	0.96687	0.957971	0.998314	0.990758	0.987093	0.898364	0.998189	0.994271
6.12099	3.22303	184.282	1.03962e-22	2.36454e-20	Nkrf	77286	X	36887540	36902899	1	0.984383	1	0.979236	0.963927	0.981287	1	1	0.974904	1	1	1	1	1	0.985877	1	1	1	0.987876	0.977931	1	1	0.977339	1	1	0.96588	1	1	1	0.904938	0.952855	1	1	1	1	1	0.948199	0.903137	1	0.961863
6.14643	7.03284	112.297	4.78055e-17	3.97904e-15	Pdha1	18597	X	160122209	160138413	0.982335	0.960318	0.998634	0.998701	0.94301	0.982778	1	1	0.979569	0.919031	0.998675	1	0.982818	0.954732	1	0.995858	0.987815	0.998507	0.996361	0.998086	0.968191	0.972551	0.998476	0.998445	0.984244	0.992379	0.998633	0.998651	0.885688	0.863472	0.995845	1	0.978943	0.975355	0.99858	0.998282	0.933228	0.841962	1	0.998746
6.14895	5.68339	207.395	3.33882e-24	9.74736e-22	Slc9a6	236794	X	56609757	56664230	0.965892	0.967958	1	0.990581	0.995732	0.995255	0.995671	0.984721	0.989696	0.876301	0.991938	0.994147	0.995696	0.951947	1	1	0.990074	1	1	1	1	0.992991	0.991675	1	0.987965	0.987033	1	1	0.978047	0.972632	0.994067	0.994148	0.969236	0.991155	1	1	0.970479	0.893788	1	0.994851
6.14896	0.960302	57.6173	1.14797e-09	4.79792e-08	Dmd	13405	X	82948870	85206141	1	1	1	1	1	1	1	1	1	1	1	1	1	1	1	1	1	#NUM!	1	1	1	1	1	1	#NUM!	#NUM!	1	1	0.757539	1	1	1	1	1	1	1	1	1	1	1
6.15026	6.72602	115.384	2.48819e-17	2.15349e-15	Kif4	16571	X	100625737	100727214	0.976012	0.97846	1	0.998273	0.948151	0.984457	0.998304	0.995784	0.98494	0.881693	1	0.995684	0.98803	0.944684	0.998185	0.998193	0.993527	0.989086	0.994642	0.997727	0.984757	0.977446	0.993236	1	0.948732	0.956111	1	1	0.907736	0.894311	1	1	0.976077	0.978917	0.99768	0.9979	0.921309	0.821333	1	0.998255
6.15639	4.78537	153.993	1.5296e-20	2.45237e-18	Mospd1	70380	X	53344598	53370502	0.984029	0.988132	1	1	0.934391	0.96782	1	1	0.986011	0.991079	1	1	0.995373	0.994241	1	1	0.967717	0.980737	1	1	0.962439	0.977318	1	1	0.993037	0.993379	1	1	0.943386	0.909967	0.98824	1	0.981765	0.989043	1	1	0.953128	0.880546	1	0.993352
6.16417	7.52797	109.866	8.05566e-17	6.40523e-15	Med14	26896	X	12675369	12762073	0.976013	0.965169	0.995978	0.996613	0.961803	0.977971	0.998961	0.996807	0.98637	0.877852	0.998904	0.996681	0.988485	0.971313	0.998992	0.997726	0.98907	0.98985	0.998993	0.995311	0.943584	0.980018	0.998035	0.999065	0.915657	0.960679	0.998926	0.998629	0.907238	0.921842	0.998957	1	0.951844	0.949177	0.996863	0.996016	0.934425	0.874945	1	0.99523
6.17216	3.49536	146.218	2.06126e-19	2.68788e-17	Gemin8	237221	X	166170454	166190512	1	0.944239	1	1	0.943778	1	1	1	0.963708	0.84087	0.918426	0.963344	1	1	1	1	0.981018	1	1	1	1	1	1	1	0.945524	0.96642	0.98484	1	0.964385	0.811995	1	1	1	0.985819	1	1	0.917851	0.910023	1	1
6.17654	6.91045	134.775	5.13702e-19	6.27275e-17	Tab3	66724	X	85574022	85634469	0.984116	0.975058	0.998401	0.99735	0.944526	0.97881	1	0.998324	0.992356	0.951663	0.997177	0.99548	0.976952	0.966033	0.998568	0.997581	0.98436	0.978342	0.998451	1	0.959826	0.947227	0.998048	1	0.979575	0.991411	0.998815	0.998761	0.926417	0.884353	0.998153	0.998377	0.962978	0.962728	0.996338	0.998222	0.935157	0.880444	0.9988	0.998518
6.18108	8.44673	126.479	2.5838e-18	2.73185e-16	Rhox6	19202	X	37826910	37829857	0.979667	0.982546	0.978795	0.974995	0.999346	0.998294	0.997694	0.998442	0.974085	0.907791	0.983094	0.943384	0.979422	0.977119	0.984951	0.982388	0.999244	0.996406	0.999168	0.998234	0.999453	0.996905	0.999215	1	0.984023	0.983243	0.973169	0.974858	0.988157	0.9937	0.998798	0.999312	0.969164	0.996894	0.998962	0.999519	0.97897	0.944214	0.970145	0.981099
6.18657	0.923832	46.0189	3.41026e-09	1.37536e-07	A630012P03Rik	100504594	X	52575843	52619047	1	1	1	1	1	1	1	1	0.855091	0.595903	1	1	#NUM!	0.485425	1	1	0.892116	1	1	1	1	0.892158	1	1	1	#NUM!	1	1	0.675632	0.649246	1	1	1	1	1	1	1	0.791352	1	#NUM!
6.19105	5.9891	301.921	2.86735e-29	1.69956e-26	Trap1a	22037	X	139333683	139338169	0.987182	0.992071	0.996305	0.995827	0.982771	0.990174	0.968703	0.981495	0.997103	0.974998	0.988782	0.958113	1	0.990568	1	0.986851	0.968008	0.978642	0.978984	0.993857	0.988925	0.982583	0.979317	0.97128	0.98764	1	1	0.99556	0.973613	0.972848	0.974024	0.97007	0.950355	0.982373	0.974996	0.987946	0.997181	0.937144	1	0.988586
6.19503	5.60867	170.294	9.66761e-22	2.01169e-19	Xlr3b	574437	X	73192207	73202930	0.977893	0.975026	0.992812	0.961991	0.995713	0.995619	0.988539	0.993139	0.986011	0.898914	0.949716	0.958326	0.947607	0.978539	0.935229	0.942915	0.991282	1	0.99347	1	0.996409	0.938996	0.985503	1	0.779715	0.884369	0.900187	0.922675	0.949357	0.956722	0.994104	1	0.965616	0.988788	0.974366	0.997214	0.94115	0.891293	0.981491	0.925974
6.20455	6.40847	143.767	9.55817e-20	1.3166e-17	Pola1	18968	X	93304767	93632155	0.978877	0.963346	0.997692	0.997446	0.973323	0.981446	0.99606	0.997883	0.979042	0.893121	1	1	0.987228	0.938114	0.997697	0.997956	0.985137	0.978123	1	0.994593	0.977915	0.970794	0.99437	0.998194	0.980055	0.983239	0.99477	1	0.914727	0.869629	1	0.990894	0.990324	0.981716	1	1	0.930922	0.821352	0.997758	1
6.22718	8.23338	143.201	1.06029e-19	1.4503e-17	Rbbp7	245688	X	162760402	162779092	0.962954	0.956841	0.995156	0.996525	0.974086	0.984174	0.997857	0.998661	0.975921	0.91201	0.995502	0.98246	0.972812	0.947646	0.992907	0.991123	0.984932	0.98966	0.996876	0.997357	0.979444	0.978535	0.996828	0.997236	0.973856	0.970478	0.996429	0.998417	0.954983	0.941922	0.993222	0.997446	0.970429	0.977507	0.992643	0.996362	0.918301	0.828789	0.996698	0.994883
6.22727	3.29712	126.744	2.45126e-18	2.6058e-16	Elk1	13712	X	20933395	20950608	0.979734	1	1	1	0.980912	0.97567	1	0.978716	1	0.904792	1	1	0.973099	0.964139	1	1	1	0.979532	1	1	0.967767	0.957895	1	1	1	0.927213	1	1	0.923956	0.752533	1	1	0.979242	0.935592	1	0.981801	0.83023	0.850504	1	1
6.23802	3.34943	121.765	1.08518e-17	1.01057e-15	Kcnd1	16506	X	7822289	7838280	0.972278	1	1	1	0.967538	0.965843	1	1	0.933398	0.797259	1	1	1	1	1	1	0.983594	0.92578	1	1	0.958838	0.959652	1	1	0.931082	1	1	0.989991	0.820866	0.904938	1	1	0.984758	1	1	1	0.919425	0.819176	1	1
6.24918	1.43461	75.7093	1.42798e-12	7.14355e-11	F8a	14070	X	73228291	73230795	1	1	1	1	1	1	1	1	1	1	1	1	1	1	1	1	1	1	1	1	1	0.892158	0.911258	1	1	1	1	1	1	0.881009	1	1	0.849405	0.805835	1	1	1	0.722801	1	1
6.25657	1.26652	82.6252	7.74059e-13	3.99488e-11	Gm15186		X	159588465	159589027	1	1	1	1	1	1	1	1	1	1	1	1	1	0.912102	1	1	1	1	1	1	0.756448	1	1	1	1	1	1	1	0.919718	1	1	1	1	1	1	1	0.850866	0.739892	1	1
6.2609	4.9633	148.837	3.81404e-20	5.60923e-18	Mospd2	76763	X	164936169	164980375	0.984422	0.977998	1	1	0.963384	0.97567	0.993104	1	0.9769	0.871406	1	1	0.972024	0.949365	1	1	0.993038	0.978167	1	1	1	1	1	0.993416	0.992444	0.972516	1	1	0.916215	0.908334	1	1	0.963513	0.975578	1	1	0.946212	0.870352	1	0.993435
6.27734	4.89554	153.593	1.64097e-20	2.58849e-18	Atp6ap2	70495	X	12587801	12617049	0.975497	0.961535	1	1	0.986291	0.990601	0.993004	1	0.982373	0.917501	0.992493	0.993129	0.955393	0.934448	1	0.993275	0.979547	0.953511	1	1	0.976984	0.969938	1	1	0.954122	0.991388	1	1	0.888965	0.886282	1	1	0.919909	0.969847	0.985291	1	0.903597	0.843367	1	1
6.28519	6.08745	296.128	5.36839e-29	2.83799e-26	Las1l	76130	X	95935335	95956962	0.989456	0.980459	0.992173	0.991869	0.96732	0.995619	0.99369	0.990182	1	0.931409	0.995945	0.997516	0.99321	0.989664	0.990729	0.99712	0.989326	0.997302	1	0.996808	0.973782	0.989131	0.997217	0.994762	0.977354	0.99435	0.988207	0.996906	0.972535	0.958189	0.983996	1	0.976202	0.988145	1	0.993014	0.968986	0.923496	0.997431	0.990808
6.31793	6.14703	121.649	6.81959e-18	6.60353e-16	Fam199x	245622	X	137049594	137082503	0.982686	0.965973	1	1	0.965827	0.98801	1	1	0.981726	0.951313	0.991907	1	0.981089	0.921738	1	0.997647	0.986689	0.985002	1	1	0.993196	0.91402	1	0.997883	0.979607	0.966597	0.996552	1	0.920052	0.902184	1	0.993755	0.985794	0.945744	1	1	0.93529	0.875557	0.997836	1
6.34363	8.39789	77.3252	1.80371e-13	9.85493e-12	Mbnl3	171170	X	51117269	51206532	0.969103	0.945322	0.999494	0.998952	0.973669	0.988461	1	0.997279	0.978479	0.898354	1	0.997853	0.988293	0.951922	1	1	0.991477	0.989198	0.996494	1	0.984056	0.987249	0.999337	0.997741	0.982995	0.982212	0.998659	0.997333	0.951856	0.94537	0.999505	1	0.979076	0.986671	0.99832	0.998928	0.938023	0.860513	1	1
6.36086	2.55844	142.618	3.85651e-19	4.86666e-17	2810403D21Rik	69964	X	108833800	108974906	1	0.955825	1	1	0.945864	1	1	1	1	0.915356	1	1	1	1	1	1	1	1	1	1	1	0.883497	1	1	1	1	1	0.947086	0.896682	0.940708	1	1	0.94861	1	1	1	0.912739	0.86487	0.951008	0.966162
6.3978	4.78199	162.52	3.52532e-21	6.56718e-19	Naa10	56292	X	73916873	73921944	0.992777	0.975316	1	1	0.988273	0.950999	1	1	1	0.838283	1	1	0.987721	0.952256	1	1	0.981384	0.98158	0.995338	1	0.976422	0.969171	1	0.990756	0.980286	0.983585	1	1	0.945007	0.978965	1	1	0.953192	0.987477	1	1	0.946891	0.875679	1	1
6.39907	5.15665	200.765	8.69545e-24	2.36226e-21	G6pdx	14381	X	74409483	74429194	1	0.954159	1	0.994302	0.972952	0.98293	1	1	0.977004	0.876338	1	1	1	0.941841	0.984245	1	0.994564	0.980546	0.995223	1	0.985132	0.981392	1	1	0.985412	1	1	1	0.91682	0.924732	1	1	0.98904	0.985389	0.991624	0.985276	0.938603	0.89469	1	0.994774
6.40365	6.65911	147.34	4.9921e-20	7.233e-18	Acsl4	50790	X	142317993	142390535	0.980322	0.988578	1	0.997934	0.962707	0.970984	0.997968	0.997732	0.987849	0.885442	1	1	0.990557	0.943567	1	0.997915	0.988824	0.998168	0.998005	1	0.985302	0.992639	1	1	0.992322	0.9891	1	0.997784	0.95113	0.942394	0.998776	0.997093	0.992678	0.973496	1	1	0.939577	0.892517	1	0.998311
6.40491	1.32612	75.8544	2.25861e-12	1.11844e-10	Eda	13607	X	99975606	100400762	1	1	1	1	1	1	1	1	1	0.662869	1	1	1	0.882997	1	1	1	1	1	1	1	0.805312	1	1	1	1	1	1	0.510154	0.569364	1	1	1	1	1	1	0.869388	0.791352	1	1
6.4066	5.0891	169.807	1.04718e-21	2.15609e-19	Ammecr1	56068	X	142851146	142966728	0.972849	0.949799	1	1	0.994276	0.993558	1	0.994854	0.977513	0.884278	1	1	0.978799	0.98319	0.989388	1	0.993876	0.97995	1	1	0.995443	0.994173	1	1	0.988729	0.994622	1	1	0.952236	0.887219	0.994746	1	0.974852	0.962396	1	1	0.917945	0.872117	1	1
6.4078	5.44826	193.849	2.41846e-23	5.91313e-21	Aifm1	26926	X	48474944	48513563	0.986985	0.968329	0.995806	1	0.983312	0.976606	1	1	0.99571	0.917081	0.996476	1	0.996124	0.969216	1	0.996081	0.986431	0.995114	0.986209	1	0.970444	0.992384	0.995593	1	0.99556	0.990668	1	1	0.96482	0.916943	0.994402	1	0.980681	0.975516	1	0.996065	0.926804	0.869514	0.995859	0.99588
6.41717	7.65657	128.963	1.58218e-18	1.73862e-16	Rps6ka6	67071	X	111388192	111537959	0.980204	0.972893	0.99777	0.998402	0.961194	0.989844	0.997116	0.998136	0.981848	0.941866	0.999007	0.995001	0.992835	0.969327	0.999202	1	0.986121	0.986451	1	0.998643	0.9758	0.977415	0.996621	0.996642	0.986013	0.990045	0.998146	0.99892	0.942921	0.902066	1	0.998667	0.984934	0.987985	1	0.999011	0.937552	0.866088	0.998413	1
6.4404	7.09082	128.813	1.62945e-18	1.78056e-16	Htatsf1	72459	X	57053583	57067183	0.978759	0.962982	1	1	0.974456	0.98357	0.998504	1	0.984539	0.901114	0.998771	0.997943	0.991796	0.949993	0.994764	1	0.985625	0.986859	0.996531	0.998834	0.983576	0.977539	1	0.998563	0.983258	0.988509	1	1	0.938147	0.909701	1	1	0.969367	0.979237	0.99807	1	0.954976	0.883663	0.998489	0.998634
6.45469	4.79335	160.964	4.59053e-21	8.1628e-19	Prkx	19108	X	77761411	77796278	0.981401	0.984828	1	1	0.961348	0.991825	1	1	0.99279	0.841901	1	1	0.985003	0.961882	1	1	0.971518	0.973799	1	1	0.96052	0.976538	1	1	0.988669	0.992211	1	1	0.961531	0.912118	0.994532	1	0.964347	0.994262	1	1	0.934484	0.875911	1	1
6.46421	4.71232	140.927	1.61365e-19	2.16185e-17	Nox1	237038	X	134086421	134221956	0.992826	0.983277	1	1	0.964454	0.97567	1	1	1	0.904194	1	1	1	0.956838	1	1	0.986921	0.96387	1	1	0.974954	0.988345	1	1	0.991868	1	1	1	0.978878	0.896417	1	1	0.96974	0.955832	1	1	0.910074	0.824605	1	1
6.46581	3.17859	169.844	1.39733e-19	1.88495e-17	Esx1	13984	X	137115397	137122083	1	0.964044	1	1	1	1	0.966678	1	1	1	1	1	1	1	1	1	0.968759	1	1	1	1	1	1	1	1	1	1	1	1	0.936741	1	1	1	1	1	1	1	0.881894	1	1
6.46936	3.19237	30.0578	6.8002e-07	2.34589e-05	Fam90a1b		X	94355053	94366777	1	1	1	1	0.891564	1	1	1	1	0.979663	1	0.997715	1	1	1	1	1	1	1	#NUM!	1	1	1	1	1	0.964745	1	1	1	1	1	1	0.697648	1	1	1	1	0.964315	1	1
6.49476	7.76598	122.274	6.00753e-18	5.96484e-16	Jade3	382207	X	20425688	20519939	0.981076	0.979887	0.996089	0.996778	0.96581	0.98031	0.998937	1	0.988722	0.933599	1	0.998314	0.986298	0.97435	0.995994	0.99586	0.98879	0.993257	0.997208	1	0.979939	0.976089	1	1	0.985113	0.971971	0.998171	0.996334	0.926284	0.940906	0.999218	0.998378	0.948201	0.974979	0.998957	0.998928	0.972032	0.888177	0.999317	0.997728
6.50298	5.44208	197.34	1.43844e-23	3.70209e-21	Ofd1	237222	X	166390033	166440704	0.982236	0.954888	1	1	0.985363	0.9904	0.993319	1	0.978374	0.939974	1	0.990264	0.977188	0.963342	1	1	0.996443	0.995515	1	1	0.994416	0.991906	1	1	0.961233	0.972516	1	1	0.937738	0.944441	1	1	0.97851	0.980235	0.995136	1	0.922038	0.850504	1	0.994442
6.52481	1.45448	79.2936	9.1012e-13	4.63592e-11	Arhgap4	171207	X	73891442	73921870	1	1	1	1	1	1	1	1	1	1	1	1	1	1	1	1	1	0.753375	1	1	1	1	1	1	1	0.883025	1	1	0.912393	0.787325	1	1	1	0.861599	1	1	1	0.759652	1	1
6.54681	3.45493	169.425	1.11486e-21	2.2481e-19	Trmt2b	215201	X	134222339	134276984	0.979337	1	1	1	1	0.956723	1	1	1	0.891216	1	1	1	0.961537	1	1	0.978486	1	1	1	1	0.932378	1	1	0.97525	0.987541	1	1	0.916215	0.952599	1	1	0.934884	1	1	1	0.957455	0.93109	1	1
6.56021	2.86258	140.848	1.63745e-19	2.1788e-17	Gm14780		X	93527573	93530309	1	0.976411	1	1	0.963927	1	1	1	1	0.864685	1	1	0.977188	0.853989	1	1	1	0.979097	1	1	0.952804	1	1	1	0.964549	1	1	1	0.925912	0.853317	1	1	0.960956	1	1	1	0.850866	0.845011	1	1
6.56482	2.85294	88.9504	1.9294e-14	1.17935e-12	Nexmif	245555	X	104077434	104201185	0.876684	1	1	1	1	1	1	1	1	1	1	1	1	0.879677	0.969283	1	1	1	1	1	1	1	0.984029	1	0.95571	1	1	0.969724	1	0.679017	1	0.914913	1	1	1	1	1	0.776621	1	1
6.56778	2.78437	106.612	2.48914e-16	1.91683e-14	Gk	14933	X	85701937	85776819	1	0.982592	1	1	0.962538	1	1	1	1	1	1	1	1	0.975941	1	1	0.942982	1	1	1	0.916487	1	1	1	1	0.977949	1	1	0.879376	0.936741	1	1	1	1	1	1	0.919425	0.936928	1	1
6.58001	5.07018	136.008	4.06274e-19	5.09405e-17	Lage3	66192	X	74351276	74353618	0.988285	0.948996	1	1	0.988549	0.99421	1	1	0.976794	0.89496	1	1	1	0.906638	1	0.995779	0.986271	0.97204	0.982779	1	0.899725	0.953879	1	1	0.979914	0.984981	1	1	0.86835	0.820899	1	1	0.953232	0.981688	1	0.99382	0.994608	0.841369	0.994501	0.995203
6.59631	10.1834	87.9763	1.22587e-14	7.63631e-13	Nrk	27206	X	138914430	139010532	0.958168	0.961352	0.998692	0.998939	0.968455	0.977811	0.996747	0.997637	0.977519	0.920712	0.998562	0.996077	0.98716	0.93881	0.996667	0.999056	0.986488	0.977777	0.996303	0.997303	0.969244	0.983821	0.996755	0.997277	0.958677	0.967746	0.999153	0.998112	0.935718	0.900989	0.997118	0.998456	0.955893	0.972826	0.997962	0.99795	0.947036	0.873175	0.998593	0.997713
6.60461	7.2637	131.772	9.15136e-19	1.07186e-16	Gnl3l	237107	X	150983141	151017322	0.988562	0.971968	0.998808	0.998017	0.96126	0.992027	0.998753	0.99879	0.990409	0.895857	1	1	0.989882	0.965545	1	0.996969	0.991458	0.992587	1	1	0.974559	0.985433	0.998792	0.996458	0.989721	0.992134	0.998786	0.997408	0.952066	0.891404	1	0.993703	0.98336	0.970448	0.997077	1	0.957543	0.864934	0.999029	0.998965
6.66576	5.61887	162.282	3.6702e-21	6.64713e-19	Renbp	19703	X	73922121	73930850	0.982506	0.978335	0.993139	1	0.982539	0.991994	1	0.995399	0.996089	0.900032	1	1	0.995394	0.957511	0.99667	0.996277	0.967536	0.955479	1	1	0.943949	0.962879	0.995632	0.995803	1	0.976891	1	0.995934	0.913469	0.950316	0.995153	1	0.974322	0.990212	1	1	0.957762	0.876235	1	1
6.68377	9.19241	106.628	1.63111e-16	1.26605e-14	Usp9x	22284	X	13071498	13173328	0.98139	0.963952	0.997446	0.996793	0.974682	0.979513	0.998028	0.997632	0.986931	0.883881	0.99844	0.998255	0.988291	0.964904	0.998596	0.998225	0.990242	0.991266	0.999285	0.999273	0.975534	0.982357	0.999692	0.997214	0.976527	0.980883	0.998742	0.998136	0.936759	0.92231	0.997852	0.998919	0.969584	0.976075	0.997998	0.998027	0.946281	0.881307	0.997217	0.997651
6.70747	6.41238	145.848	6.53889e-20	9.33581e-18	Timm8a1	30058	X	134537256	134541865	0.993685	0.954824	1	1	0.981563	0.991578	0.998126	1	0.984598	0.84579	0.993545	1	1	0.96186	0.997135	0.997476	0.99652	0.99712	1	1	0.998793	0.994156	1	1	0.989625	0.984765	0.995557	1	0.978801	0.958189	1	1	0.994186	0.995578	1	0.997637	0.908579	0.798181	0.996771	0.996981
6.7373	2.28706	20.2289	4.59426e-05	0.00135337	Gm14661		X	60557728	60807993	#NUM!	#NUM!	1	1	1	1	1	1	#NUM!	1	1	1	1	1	1	#NUM!	1	1	1	1	1	1	1	1	1	1	1	1	1	1	1	1	1	1	1	1	1	1	1	1
6.77854	1.73765	28.4197	2.82704e-06	9.18552e-05	Tex13b	83555	X	140808307	140813433	1	1	#NUM!	1	1	1	1	1	1	1	1	1	1	1	1	1	0.981384	1	1	1	1	1	1	1	1	#NUM!	1	#NUM!	1	1	1	#NUM!	#NUM!	1	1	#NUM!	1	1	1	1
6.86418	5.57726	274.883	5.83328e-28	2.7829e-25	Xlr3a	22445	X	73086293	73097095	0.984833	0.99122	1	0.992208	0.992055	0.982468	0.997234	0.993682	0.992119	0.857388	0.931085	0.931633	0.9895	0.992322	1	0.983461	0.989519	0.979437	0.990704	0.994754	0.987891	0.99222	0.991675	0.985755	0.941001	0.95799	0.992678	0.986823	0.969357	0.944207	0.986284	0.987248	0.984308	0.985164	0.988216	0.987716	0.992848	0.964674	1	0.992603
6.87142	5.94845	204.847	4.81092e-24	1.38385e-21	Bclaf3	382252	X	159526688	159593081	0.985277	0.982873	1	0.994407	0.986481	0.987685	1	0.995215	0.994398	0.943903	1	0.986633	0.996748	0.98978	1	1	0.979831	0.975126	1	1	0.996669	1	0.996283	0.996246	0.981101	0.988812	1	1	0.96966	0.944571	1	1	0.93929	0.99134	1	1	0.952617	0.934917	0.997051	1
6.87195	7.63283	192.256	3.0719e-23	7.3276e-21	Klhl13	67455	X	23219271	23365082	0.989742	0.992885	0.995882	0.9939	0.992963	0.978156	0.989984	0.994396	0.996309	0.941278	0.996658	0.98998	0.998131	0.983305	0.998494	0.998392	0.990074	0.992912	0.995548	0.997706	0.988358	0.991478	0.994407	0.995438	0.966422	0.988375	0.99491	0.992798	0.903597	0.903624	0.99016	0.989156	0.905884	0.929162	0.995169	0.995297	0.993794	0.929643	0.997146	0.999177
6.87781	3.1463	151.373	3.35709e-19	4.26394e-17	4933402E13Rik	74437	X	62283499	62292078	1	0.984828	1	1	1	1	0.956058	1	1	0.971158	1	1	1	1	1	1	1	1	1	1	1	1	1	1	0.95379	1	1	1	0.95307	0.970861	1	1	1	1	1	1	1	0.959522	1	1
6.9252	6.98686	236.117	6.71143e-26	2.62551e-23	Hmgn5	50887	X	109004534	109013404	0.98772	0.975639	0.998238	1	0.989591	0.992777	0.99235	0.998174	0.995008	0.932917	1	1	0.992531	0.991229	1	0.996167	0.996742	0.997331	0.998188	0.996571	0.994036	0.996487	0.996918	0.997218	0.991165	0.995592	1	0.996276	0.974129	0.980798	0.994429	0.995012	0.988032	0.984392	0.99864	0.998591	0.972533	0.885529	0.996975	1
7.00374	2.76338	265.312	2.54836e-24	7.66859e-22	Slc25a43	194744	X	36743659	36777202	1	1	1	1	0.957646	1	1	1	1	0.907673	1	1	1	1	1	1	1	1	1	1	1	1	1	1	1	1	1	1	0.967951	1	1	1	1	0.959781	1	1	1	1	1	1
7.0049	1.8032	90.974	1.18235e-13	6.53296e-12	Gm14790		X	93981069	93982469	1	1	1	1	1	1	1	1	1	1	1	1	1	#NUM!	1	1	1	1	1	1	1	1	1	1	1	0.904178	1	1	1	0.863877	1	1	0.93896	1	1	1	1	0.938161	1	1
7.0341	4.97881	127.753	2.00765e-18	2.15768e-16	Gata1	14460	X	7959260	7978071	0.977738	0.978661	1	1	1	0.988509	1	1	0.996134	0.893551	1	1	1	0.988907	1	1	1	0.993408	1	1	1	0.987754	1	0.990621	0.841342	0.987965	1	0.995686	0.871864	0.87085	1	1	0.902853	0.96335	1	1	1	0.835804	1	1
7.07148	5.59275	189.871	4.40681e-23	1.03852e-20	Sms	20603	X	157443855	157492287	0.990669	0.969245	0.994226	1	0.99212	0.993921	1	1	0.988704	0.862861	0.995247	1	0.992552	0.931224	0.995454	0.995847	0.995952	0.990338	0.989183	0.993042	0.980539	0.985153	0.996764	1	0.995948	0.992744	1	1	0.939586	0.93737	1	1	0.981083	0.984319	0.996085	1	0.899582	0.85613	1	0.98779
7.09647	6.76426	261.525	2.8153e-27	1.28064e-24	Elf4	56501	X	48411046	48463132	0.991468	0.98916	1	0.997977	0.980351	0.993882	0.992099	1	0.992413	0.959033	0.998368	0.991783	0.998376	0.991722	0.994866	0.998184	0.991511	0.996492	1	1	0.998149	0.99657	0.992195	1	0.990545	0.99341	0.998306	1	0.962038	0.98811	1	1	0.975383	0.988117	0.994301	0.995259	0.986452	0.914372	0.990659	1
7.14584	4.28667	295.705	1.76648e-28	9.09275e-26	Smim10l2a	320237	X	56374586	56377799	1	0.961667	1	1	1	1	0.990977	0.992023	1	0.972521	1	1	1	1	1	1	0.992988	1	0.991711	0.987712	1	0.990874	0.980895	0.991417	0.980989	1	0.983158	1	0.990097	0.93398	0.989663	1	0.990246	0.993573	1	1	1	0.916366	1	1
7.16253	2.06676	30.6494	7.40696e-07	2.54176e-05	Xkrx	331524	X	134149043	134162076	1	1	1	1	1	#NUM!	#NUM!	#NUM!	1	0.949184	1	1	1	1	1	0.981722	1	#NUM!	1	1	#NUM!	1	#NUM!	1	1	1	1	1	1	0.760373	1	1	1	0.861599	1	1	1	1	1	1
7.17495	8.93128	113.811	3.46637e-17	2.93516e-15	Bex1	19716	X	136213972	136215513	0.976428	0.972558	1	0.998716	0.986177	0.993214	0.998554	0.999689	0.983208	0.907627	0.998515	0.992007	0.977889	0.974204	0.999162	0.997693	0.993809	0.995462	0.99913	0.997804	0.985262	0.993269	0.99817	0.998128	0.974226	0.981583	0.998417	0.999237	0.971946	0.964787	0.997329	0.997995	0.986261	0.993124	0.99897	0.999323	0.946235	0.833915	0.999568	0.999037
7.21375	2.40883	55.2898	4.38988e-10	1.86261e-08	Dmrtc1b	632708	X	102707865	102715209	1	1	1	1	1	1	1	1	1	1	1	1	1	1	1	1	1	1	1	1	1	1	1	1	1	1	1	1	1	0.973698	1	1	0.902245	0.968873	1	1	1	0.951071	1	1
7.2196	4.05679	105.867	2.92335e-16	2.23362e-14	Il2rg	16186	X	101264378	101268255	1	0.983662	1	1	0.980132	1	1	1	1	0.905529	1	1	1	0.971777	1	1	1	1	1	0.989993	1	1	1	1	0.981801	0.985495	1	1	0.910208	0.856356	1	1	0.952083	0.951723	1	1	0.946667	0.911462	1	1
7.22662	8.34314	194.31	2.25731e-23	5.58899e-21	Bcor	71458	X	12036740	12160355	0.99362	0.980202	0.996576	0.996679	0.993041	0.989611	0.996096	0.997009	0.996884	0.908822	0.995738	0.993775	0.995881	0.981057	0.99845	0.994317	0.994024	0.995087	0.998304	0.998826	0.994861	0.98551	0.996686	0.996971	0.994224	0.992516	0.99861	0.997724	0.961662	0.925348	0.997308	0.999202	0.977163	0.986665	0.998553	0.997668	0.982899	0.904698	0.99778	0.998989
7.27796	3.57371	157.277	8.63798e-21	1.46921e-18	Mtcp1	17763	X	75410444	75416588	0.974304	1	1	1	0.981632	1	1	1	1	0.848569	1	1	0.952359	0.901177	1	1	1	0.964265	1	1	0.941339	0.956637	0.986835	1	1	0.968885	1	1	0.946538	0.951793	1	1	0.979242	0.953283	1	1	0.9448	0.863411	1	1
7.36027	2.2245	109.672	1.08474e-15	7.77201e-14	Platr21	78526	X	139240226	139357738	1	1	1	1	1	1	1	1	1	0.843922	1	1	1	1	1	1	1	1	1	1	1	1	1	1	0.973397	1	1	1	0.872994	0.925038	1	1	0.969504	1	1	1	1	0.726397	1	1
7.38985	8.33188	302.607	2.66361e-29	1.62813e-26	Dusp9	75590	X	73639419	73643514	0.994248	0.980281	0.997773	0.995654	0.995218	0.99296	0.997285	0.996377	0.995279	0.945219	0.995905	0.998245	0.997189	0.994825	0.993525	0.997629	0.997538	0.994015	0.998828	0.99766	0.992634	0.992333	0.99668	0.998834	0.994124	0.994628	0.997246	0.998743	0.983536	0.985987	0.997537	0.99599	0.970294	0.990847	0.99537	0.995088	0.991076	0.93275	0.994719	0.994633
7.41075	3.08226	86.6769	4.71765e-14	2.77109e-12	Xlr4b	27083	X	73214333	73222453	1	1	0.985331	1	1	1	1	1	0.988448	1	0.97797	1	1	0.985289	1	1	1	1	1	1	1	1	1	1	0.986519	0.986763	1	0.936857	0.831846	0.823133	1	1	0.959328	0.922672	1	1	1	0.951447	0.986971	0.944262
7.43702	3.00602	56.4325	3.24698e-10	1.39278e-08	Gm9112	668339	X	102706890	102707635	1	1	1	1	1	1	1	1	1	1	1	1	1	1	1	1	1	1	1	1	1	1	1	1	1	0.990193	1	1	0.990674	1	1	1	0.809471	1	1	1	1	0.953241	1	1
7.4614	8.79159	115.843	2.25973e-17	1.97323e-15	Plac1	56096	X	53069995	53240111	0.983042	0.979708	0.998292	0.998696	0.984429	0.996501	0.998618	0.9994	0.991311	0.899406	0.998463	0.993238	0.994349	0.968961	0.996877	0.997751	0.988217	0.955485	0.997913	0.999319	0.984461	0.978551	0.997052	0.999605	0.955346	0.971542	0.999526	0.99676	0.936133	0.943233	0.999593	0.999038	0.959384	0.979607	0.998097	0.997637	0.959749	0.864039	0.99776	0.993041
7.47194	4.71976	153.403	3.17234e-20	4.73672e-18	Gm26617		X	94793103	94798237	0.993723	1	1	1	1	0.935045	1	1	0.989519	0.928004	1	1	1	0.98358	1	1	1	1	1	1	0.945478	1	1	1	0.986604	0.988167	1	0.983684	0.963171	0.956377	1	0.99544	0.974765	0.983927	1	1	0.971307	0.914866	1	1
7.50438	5.62411	237.697	5.46988e-26	2.22898e-23	Mtmr1	53332	X	71364760	71419196	0.992875	0.988496	1	1	0.990597	0.990601	1	0.995821	0.977972	0.913353	1	1	0.996095	0.971683	0.995947	1	1	0.993861	1	1	0.984757	0.989672	1	1	1	0.995567	1	1	0.93902	0.944207	1	1	0.971214	0.980863	0.996021	1	0.956604	0.898007	0.996295	0.99309
7.54102	5.31935	235.683	1.82634e-25	6.49514e-23	BC065397	436230	X	136741824	136803364	0.994753	0.977023	1	1	0.992426	0.996398	1	1	1	0.936494	1	1	0.985352	0.96434	1	1	1	1	1	1	0.974998	0.995795	1	1	0.959727	0.994179	1	1	0.99515	0.956919	1	0.990599	0.974721	1	1	1	0.9796	0.877738	1	1
7.60426	10.2462	140.561	1.72711e-19	2.26727e-17	Rlim	19820	X	103957163	103981284	0.990354	0.985377	0.999078	0.998169	0.984934	0.99046	0.997581	0.997368	0.992302	0.94241	0.999393	0.996521	0.9961	0.981849	0.998881	0.998041	0.996425	0.980532	0.99867	0.998788	0.989138	0.975184	0.997026	0.997182	0.987686	0.989988	0.997738	0.998853	0.952542	0.959099	0.998365	0.998148	0.9654	0.982216	0.997941	0.998084	0.980182	0.910638	0.997626	0.998069
7.63548	4.16732	202.733	6.52943e-24	1.79881e-21	Ccdc120	54648	X	7731714	7750905	0.988019	1	1	1	1	0.988945	1	0.991376	0.988179	0.880572	1	1	1	0.987082	1	1	0.986921	1	1	1	1	0.978006	1	1	0.955088	0.965322	0.986566	1	0.972794	0.952992	0.983775	1	0.894297	0.984932	1	1	0.977164	0.864475	1	1
7.89395	2.77019	167.345	4.78497e-19	5.8911e-17	Mageb16	71967	X	79623231	79671435	1	1	1	1	1	1	1	1	1	1	1	1	1	1	1	1	1	1	1	1	1	1	1	1	1	1	1	1	1	0.947316	1	1	0.979242	1	1	0.970759	1	0.880217	1	1
8.05387	3.21105	212.444	2.00093e-21	3.99368e-19	Rhox1	385343	X	37213804	37222258	1	1	1	1	1	1	1	1	1	0.839826	1	1	1	1	1	1	1	1	1	1	1	1	1	1	1	1	1	1	1	1	1	1	0.985441	0.979478	1	1	1	0.966039	1	1
8.05511	4.57293	239.92	1.0729e-25	4.03575e-23	Il13ra1	16164	X	36112110	36171259	1	0.989377	1	1	0.991682	1	1	1	1	0.873124	1	1	1	0.987962	1	1	1	1	1	1	1	1	0.983202	1	1	1	1	1	1	0.97691	1	1	0.981934	1	1	0.993615	1	0.936118	0.990741	1
8.18403	3.59129	68.1794	5.96596e-12	2.88134e-10	S100g	12309	X	162961992	162964599	1	1	0.981474	1	1	0.993002	1	1	0.983058	1	1	1	1	1	1	1	1	#NUM!	1	0	1	1	1	1	1	1	1	1	1	1	1	1	1	0.970762	1	1	1	0.981515	1	1
8.35058	4.7048	103.088	2.01827e-15	1.37552e-13	Lonrf3	74365	X	36328353	36362341	1	0.991951	1	0.994647	1	1	1	1	0.980453	0.917523	1	0.997494	1	1	1	1	1	1	1	1	1	1	1	1	0.97899	0.993076	1	1	0.975264	0.995959	1	1	0.945752	1	1	1	0.981404	0.937156	1	1
8.35233	7.0257	116.949	1.79368e-17	1.58038e-15	Arhgef6	73341	X	57231485	57338729	0.997756	0.995034	1	1	0.98853	1	1	1	0.989834	0.9269	0.998528	0.998941	0.991225	0.974797	1	1	1	0.995566	1	1	0.992362	0.995783	1	0.996592	0.993708	0.996789	0.993259	1	0.993309	0.991064	0.999378	1	0.966619	0.993379	0.998756	0.998146	0.99372	0.961972	0.997079	1
8.43249	4.95854	392.921	4.44722e-33	3.95398e-30	Akap17b	338351	X	36608314	36645395	1	1	0.99403	1	1	0.994175	0.994254	1	1	0.988377	0.995159	1	1	0.98319	0.99485	0.995944	0.980925	1	1	0.992172	1	1	0.994901	1	1	1	1	1	0.989781	0.990816	1	1	0.985655	1	1	1	0.988057	0.924061	1	1
8.454	3.31317	211.038	7.89889e-22	1.67937e-19	Pnma5	385377	X	73033981	73037103	1	1	1	1	1	1	1	1	1	1	1	0.974333	1	1	1	1	1	1	1	1	1	1	1	1	1	1	1	1	1	0.9818	1	1	1	1	1	0.982777	1	1	1	1
8.53874	7.25667	297.392	4.67782e-29	2.54161e-26	AU015836		X	93968659	93975470	0.99442	0.996651	0.996892	0.997747	0.998924	0.999083	0.998131	0.997085	1	0.969259	0.99759	0.989755	0.998264	0.997817	0.998754	1	0.999037	1	0.99705	1	1	0.998412	0.998897	0.998859	0.997602	0.994658	0.998857	0.994449	0.995277	0.997095	1	1	0.996287	0.998713	0.996585	0.997214	0.997734	0.916747	0.997584	1
8.99219	5.87395	396.39	3.29442e-33	3.06852e-30	Gm9	194854	X	37209348	37211041	0.996986	1	0.996381	0.996656	1	1	1	0.996862	1	0.925923	1	1	1	1	1	0.993683	0.996976	1	0.997462	1	0.9965	1	1	0.997034	0.996649	1	1	1	0.983289	0.988174	1	1	0.988558	0.996249	1	1	0.997055	0.94813	1	1
9.11032	7.39487	235.586	7.19017e-26	2.75764e-23	3830417A13Rik	70696	X	64173548	64178778	0.994591	0.997031	1	1	0.996598	1	1	0.997888	0.998934	0.977753	0.998874	0.999057	1	1	0.994868	1	0.994492	0.998313	1	0.998179	0.9902	0.992502	0.997975	0.995719	0.996651	0.997601	0.998964	0.999438	0.973145	0.973886	0.998317	1	0.966095	0.991689	0.999221	1	0.998083	0.946607	0.99884	0.998667
9.30494	6.59736	320.703	3.99862e-30	2.63565e-27	Vgll1	170828	X	57088106	57106540	1	0.994774	1	1	0.99796	1	0.995935	1	1	0.948324	1	1	0.99796	0.998548	0.998324	1	1	0.994323	1	1	1	1	0.995793	0.996163	0.996221	1	0.998438	1	1	0.995387	1	1	0.995685	0.994817	1	0.99762	0.995649	0.930495	1	1
9.67007	8.34462	257.287	4.69869e-27	2.08878e-24	Ldoc1	434784	X	61709497	61710955	0.998473	0.998467	0.997946	1	0.999385	0.999005	0.99833	0.999175	1	0.963202	1	0.998106	0.998441	0.997993	0.998302	0.998067	0.998677	0.998405	0.998653	1	0.999328	0.998432	0.998841	0.997486	0.99654	0.996261	0.998947	0.99765	0.99787	0.993516	0.998985	1	0.978584	0.99767	0.997999	0.999562	0.99942	0.923693	1	0.999359
9.98161	4.59044	247.127	1.51122e-24	4.76766e-22	Fmr1nb	207854	X	68761839	68804567	1	1	1	1	1	1	1	1	1	0.9755	1	1	1	1	1	1	1	0.990989	0.989571	0.987393	1	1	1	1	1	1	1	0.993409	0.98814	1	1	1	0.975193	0.989743	1	1	1	0.97974	0.994472	1
10.6512	6.66862	333.068	4.0424e-30	2.63565e-27	Fthl17a	71996	X	85249679	85270288	1	1	1	1	1	1	0.998165	1	1	0.990583	0.996541	1	1	1	1	1	1	0.998697	0.995338	1	1	0.998691	1	0.998047	0.998166	1	1	1	1	0.997922	1	0.996825	0.982241	0.99641	1	1	1	0.948829	1	0.992744
										0	0.1	0.2	0.3	0.4	0.7	0.5	0.6	0.8	0.9	1
9.94834	7.33482	136.543	6.38483e-19	7.69105e-17	mt-Rnr1		MT	70	1024	0.998619	1	0.999072	0.996382	0.998803	0.996868	1	0.999614	1	0.995334	1	0.997995	0.987039	0.998556	1	0.998712	1	1	1	1	1	0.996755	1	1	1	1	1	0.994873	0.993545	1	0.997089	0.995929	0.999735	0.998234	0.998481	0.998238	0.997674	0.997944	0.995043	1
11.3789	8.20518	240.08	2.30017e-24	7.02989e-22	mt-Rnr2		MT	1094	2675	1	1	0.999191	1	1	0.998696	0.998833	1	1	1	0.998768	0.999557	1	1	1	1	1	1	1	1	1	1	1	1	1	1	1	1	1	1	1	1	0.999578	0.999664	1	1	1	1	1	0.998729
13.0775	12.3721	1747.08	3.37821e-57	1.32156e-53	mt-Nd1	17716	MT	2751	3707	0.999737	0.999715	0.999807	0.99996	1	1	0.999861	0.999962	0.999961	0.999914	0.999911	0.999421	0.99992	0.999958	1	0.999881	0.999937	1	0.999965	0.999849	0.999915	0.999964	0.99988	1	0.999968	0.999965	0.999922	1	0.999931	0.999969	0.999969	0.999949	0.999931	0.999969	0.99991	0.999878	0.999711	0.999925	0.99996	0.99984
8.77813	3.85242	128.431	1.53801e-14	9.49004e-13	mt-Ti		MT	3706	3774	1	1	1	1	1	1	1	1	1	1	1	1	1	1	1	1	1	1	1	1	1	1	1	1	1	1	1	1	1	1	1	1	1	1	1	1	1	1	1	1
10.1452	5.25232	245.36	3.97655e-20	5.80457e-18	mt-Tq		MT	3772	3842	1	1	1	1	1	1	1	1	1	1	1	1	1	1	1	1	1	1	1	1	1	1	1	1	1	1	1	1	1	1	1	1	1	1	1	1	1	1	1	1
9.35181	4.86916	117.57	2.09393e-15	1.42213e-13	mt-Tm		MT	3845	3913	1	1	1	1	1	1	1	1	1	1	1	1	1	1	1	1	0.985334	1	1	1	1	1	1	1	1	1	1	0.984629	1	1	0.997684	1	1	0.997932	1	0.997173	1	1	1	1
12.0701	10.2167	1713.81	7.19277e-57	2.00987e-53	mt-Nd2	17717	MT	3914	4951	1	1	0.999744	0.999811	1	0.999856	0.999401	0.999538	1	0.999636	0.999784	1	0.999802	0.999837	1	0.999834	0.999719	1	1	0.999802	0.999866	0.999835	1	0.999848	0.999859	0.999701	0.999673	0.999584	0.999906	0.999747	0.999603	0.999302	0.99983	0.999077	0.999635	0.999414	0.999414	0.999652	0.999658	1
7.87181	4.73766	112.034	1.22857e-15	8.67537e-14	mt-Tw		MT	4950	5016	0.983269	1	1	1	1	1	0.990891	1	1	1	1	1	1	1	1	1	1	1	1	1	1	1	1	1	1	1	1	1	1	0.994596	1	1	1	1	1	0.996721	1	1	1	1
7.52218	2.85524	134.607	1.47741e-16	1.15132e-14	mt-Ta		MT	5018	5086	1	1	1	1	1	1	1	1	1	1	1	1	1	1	1	1	1	1	1	1	1	1	0.948675	1	1	0.976992	1	1	1	1	1	1	1	1	0.986431	1	1	1	1	1
8.07483	2.86071	178.366	5.91719e-17	4.84269e-15	mt-Tn		MT	5089	5159	1	1	1	1	1	1	1	1	1	1	1	1	1	1	1	1	1	1	1	1	1	1	1	1	1	1	1	1	1	1	1	1	1	1	1	1	1	1	1	1
8.76236	5.16571	415.328	3.21634e-31	2.51646e-28	mt-Tc		MT	5192	5257	1	1	0.993312	1	1	0.991391	1	1	1	0.972428	1	0.990218	1	1	1	1	0.995303	1	0.994123	1	1	1	1	1	1	0.996243	1	0.991613	1	1	1	1	1	1	1	1	1	1	1	1
7.54546	3.5283	224.68	1.38615e-23	3.61507e-21	mt-Ty		MT	5260	5326	1	1	1	1	1	0.973695	1	1	1	1	1	1	1	1	1	1	1	1	0.989897	1	1	1	1	1	1	1	1	1	1	1	1	1	1	1	1	0.986417	1	1	1	1
11.7762	13.6173	2214.68	2.87743e-61	5.62826e-57	mt-Co1	17708	MT	5328	6872	0.999741	0.999589	0.999592	0.999672	0.999776	0.999792	0.999771	0.999833	0.99951	0.999214	0.999852	0.999251	0.999741	0.999679	0.999698	0.99972	0.999839	0.999804	0.999848	0.999801	0.999858	0.999931	0.999889	0.999692	0.999628	0.99957	0.999868	0.999704	0.999915	0.999819	0.999924	0.999854	0.999865	0.999751	0.999762	0.999857	0.99958	0.999671	0.999779	0.999647
11.0671	9.14318	1847.31	3.75841e-58	1.83786e-54	mt-Ts1		MT	6870	6938	1	0.999248	0.998949	0.999655	0.999163	1	1	0.999609	0.999256	0.998989	0.999725	0.999047	0.999756	0.999144	0.999442	0.998817	0.999632	0.998995	0.99963	0.998416	1	0.999622	1	1	1	0.999564	0.999769	0.999703	0.999414	0.999179	0.99939	0.999391	0.999491	0.998653	0.999684	1	0.99917	1	0.999501	0.999727
5.59109	0.75131	32.6354	9.35509e-07	3.18236e-05	mt-Atp8	17706	MT	7766	7969	1	1	1	#NUM!	1	1	1	1	1	1	1	1	1	1	1	1	1	1	1	1	#NUM!	1	1	1	1	1	1	1	1	1	1	1	1	1	1	1	#NUM!	#NUM!	1	1
10.5451	10.2906	1116.18	1.23585e-49	2.41732e-46	mt-Atp6	17705	MT	7927	8607	0.998288	0.997999	0.99942	0.999079	0.999402	0.999871	0.999873	0.999846	0.998846	0.998799	0.999719	0.996937	0.999307	0.999094	0.998524	0.999148	0.99951	0.999755	0.999865	1	0.999882	0.999876	0.999898	0.999407	0.999232	0.998281	0.99951	0.998945	0.999786	0.999882	1	0.99974	0.999485	0.99979	0.99967	0.999885	0.999009	0.998292	0.999563	0.999478
11.851	10.9989	747.169	4.08511e-42	5.32698e-39	mt-Co3	17710	MT	8607	9390	0.999579	0.999631	0.998806	0.999669	0.999912	1	0.999828	0.999907	0.999341	0.998366	0.999374	0.999246	0.999299	0.99937	0.999384	0.999382	1	1	1	0.999865	1	1	1	1	0.99959	0.997993	0.999108	0.999419	1	0.999224	0.99992	1	1	1	0.999936	1	0.999012	0.998383	0.999558	0.999175
11.9691	9.34313	1859.4	8.26695e-57	2.02127e-53	mt-Nd3	17718	MT	9459	9806	1	0.999238	0.999548	1	0.999659	0.999692	1	1	1	1	0.998934	1	0.99944	0.999719	0.999645	1	0.999503	0.999649	1	0.999359	0.999464	1	0.999454	0.999532	1	1	0.999771	0.99966	1	1	1	1	0.999821	0.999725	1	0.999727	1	1	1	0.999511
10.2452	9.36169	224.298	3.20363e-25	1.09935e-22	mt-Nd4l	17720	MT	9877	10173	0.999021	0.999525	0.999436	0.999051	0.998812	0.998918	1	0.998733	0.999726	0.99894	0.999656	0.999417	0.999598	0.999176	0.999245	0.999317	0.99798	0.997111	1	0.998852	1	0.998885	0.997009	0.998829	0.999626	0.999191	0.999167	0.999463	0.998363	1	0.998922	1	0.999308	1	0.995566	0.998997	0.998937	0.999347	0.998735	0.999189
11.9675	11.5634	1713.83	7.18961e-57	2.00987e-53	mt-Nd4	17719	MT	10167	11544	0.999514	0.999475	0.999564	0.999852	0.999866	1	0.999873	0.999804	0.999852	0.99971	0.999747	0.999859	0.999931	0.999855	0.999464	0.999769	0.999671	1	0.999888	0.999788	0.999946	0.999815	0.999721	0.999763	0.999806	0.999735	0.999782	0.999914	0.999773	0.999789	0.999939	0.999949	0.999886	0.999846	0.999848	1	0.999659	0.999547	0.999458	0.999925
12.2213	11.2422	2163.11	7.3273e-61	7.1661e-57	mt-Nd5	17721	MT	11742	13565	0.999622	0.999706	0.999896	0.999829	0.999824	0.999786	0.999855	0.999913	0.999706	0.999837	0.999362	0.999492	0.999834	0.999683	0.999829	0.99982	0.999412	0.999904	0.999743	0.999757	0.999864	0.999786	0.999733	0.999595	0.999779	0.99962	0.999848	0.999918	0.999838	0.999926	0.999843	0.999544	0.999903	1	0.999857	0.999392	0.999826	0.999923	1	0.999842
8.82933	9.9008	437.679	1.08596e-34	1.11797e-31	mt-Nd6	17722	MT	13552	14070	0.995638	0.995324	0.994653	0.996293	0.999106	0.99981	0.999415	0.999759	0.99476	0.989292	0.99071	0.992672	0.994789	0.995398	0.995566	0.991305	1	0.999783	0.99978	1	0.999618	0.999732	0.999719	0.999614	0.998031	0.995885	0.993001	0.995403	0.999833	0.99949	0.999645	0.999799	0.999637	0.999652	0.999782	0.999407	0.996831	0.998256	0.993736	0.99398
8.15114	3.23402	127.89	6.44951e-15	4.13615e-13	mt-Te		MT	14071	14139	1	1	1	1	1	1	1	1	1	1	1	1	1	1	1	1	1	1	1	1	1	1	1	1	1	1	1	1	1	1	1	0.994714	1	1	1	1	1	1	1	1
11.5793	12.6202	1860.4	2.84484e-58	1.83786e-54	mt-Cytb	17711	MT	14145	15288	0.999465	0.999621	0.999732	0.999645	0.999733	0.999702	0.999759	0.999809	0.999727	0.999394	0.999642	0.998981	0.999758	0.999659	0.999686	0.999711	0.999585	0.999661	0.99965	0.999792	0.999771	0.999778	0.999639	0.999838	0.999114	0.999372	0.999752	0.999689	0.999737	0.999647	0.999621	0.999463	0.999934	0.99952	0.999635	0.999944	0.999375	0.999487	0.999644	0.999703
7.63067	2.58592	118.619	5.55028e-14	3.20246e-12	mt-Tt		MT	15289	15355	1	1	1	1	1	1	1	1	1	1	1	1	1	1	1	1	1	1	1	1	1	1	1	1	1	1	1	1	1	1	1	1	1	1	1	1	1	1	1	1
9.17745	4.19951	258.89	1.3864e-20	2.29813e-18	mt-Tp		MT	15356	15422	1	1	1	1	1	1	1	1	1	1	1	1	1	1	1	1	1	1	1	1	1	1	1	1	1	1	1	1	1	1	1	1	1	1	1	1	1	1	1	1
[truncated: 105 more columns]

## Sheet: Control.Imprint.NoMousebook
logFC	logCPM	F	PValue	FDR	mgi_symbol	entrezgene_id	chromosome_name	start_position	end_position	Control_Ratio	Control_Ratio.1	Control_Ratio.2	Control_Ratio.3	Control_Ratio.4	Control_Ratio.5	Control_Ratio.6	Control_Ratio.7	MAT_MUT_Ratio	MAT_MUT_Ratio.1	MAT_MUT_Ratio.2	MAT_MUT_Ratio.3	MAT_WT_Ratio	MAT_WT_Ratio.1	MAT_WT_Ratio.2	MAT_WT_Ratio.3	PAT_HAPLO_Ratio	PAT_HAPLO_Ratio.1	PAT_HAPLO_Ratio.2	PAT_HAPLO_Ratio.3	Mat_HAPLO_Ratio	Mat_HAPLO_Ratio.1	Mat_HAPLO_Ratio.2	Mat_HAPLO_Ratio.3	HOMO_SIX_Ratio	HOMO_SIX_Ratio.1	HOMO_SIX_Ratio.2	HOMO_SIX_Ratio.3	HOMO_TWELVE_Ratio	HOMO_TWELVE_Ratio.1	HOMO_TWELVE_Ratio.2	HOMO_TWELVE_Ratio.3	HOMO_SIX_Ratio.4	HOMO_SIX_Ratio.5	HOMO_SIX_Ratio.6	HOMO_SIX_Ratio.7	WT_SIX_Ratio	WT_SIX_Ratio.1	WT_SIX_Ratio.2	WT_SIX_Ratio.3
1.98654	2.53497	37.9368	2.55889e-08	9.79491e-07	Gm6104		1	4880049	4880651	0.883493	0.730071	0.773024	0.845455	0.691584	0.737683	0.893172	0.849743	0.774885	0.584102	0.920512	0.764402	0.860869	0.834196	0.870021	0.932917	0.726623	0.820856	0.529443	0.507514	0.664032	0.922434	0.70821	0.939791	0.766557	0.918853	0.856383	0.798246	0.769195	0.547269	0.614733	0.816671	0.568689	0.765309	1	0.756834	0.525926	0.500989	0.71632	0.833241
9.33433	9.22101	1048.44	1.35728e-48	2.41349e-45	Gm28439		1	24611535	24612410	0.996565	0.998434	0.998638	0.999456	1	0.999207	0.998791	0.997806	0.99939	0.997296	0.99965	0.998855	0.999446	0.999146	0.999398	0.99912	0.998709	0.998462	0.998529	1	0.999688	1	0.99967	0.999664	0.998818	0.998579	0.99971	0.999617	0.999071	0.999658	1	0.99968	0.999463	0.999714	0.998583	1	0.998365	0.998682	0.999235	0.999096
13.3895	8.25938	50.3812	4.09064e-09	1.64297e-07	Gm10222		1	24612407	24612700	1	1	1	1	1	1	1	1	1	1	1	1	1	1	1	1	1	1	1	1	1	1	1	1	0.977354	1	1	1	1	1	1	1	1	1	1	1	1	1	1	1
13.7646	9.59513	1656.54	2.73106e-56	5.9355e-53	Gm28438		1	24612775	24613119	1	0.999602	1	1	1	1	1	1	1	0.999452	1	1	1	1	0.999694	1	1	1	1	0.999746	0.999661	1	1	0.999806	1	0.999745	1	1	0.999607	1	0.999521	1	1	1	0.999818	1	0.998757	1	1	1
10.7847	11.1656	215.315	1.09488e-24	3.5693e-22	Gm28437		1	24613189	24613971	0.999477	0.999469	0.999715	0.999648	0.998695	0.996326	0.998532	0.998644	0.999639	0.999357	0.999527	0.999322	0.999599	0.99968	0.999596	0.999633	0.999643	0.998468	0.999643	0.999638	0.999106	0.998892	0.997958	0.997961	0.998922	0.999379	0.999549	0.999507	0.997755	0.999022	0.999188	1	0.999765	0.998686	0.999332	0.999354	0.999115	0.999212	0.999654	0.999571
10.4605	8.83083	188.764	2.50343e-22	5.50192e-20	Gm10925		1	24613974	24614651	0.999692	0.9986	0.999322	0.999433	1	1	1	0.998047	0.999808	0.999302	0.999296	0.999272	0.999423	0.999806	0.999561	0.999594	1	1	1	1	1	1	1	1	0.999159	0.999	0.999615	0.999315	1	1	0.997924	0.998	1	0.998607	1	0.998491	0.998911	0.999428	0.998984	0.999791
5.29422	3.34443	111.48	5.69279e-17	4.69835e-15	Gm28661		1	24614885	24615565	1	1	1	0.962216	0.943778	0.983056	1	0.963943	1	1	1	0.91458	1	1	1	0.954751	1	0.931397	1	1	1	0.986563	0.958217	0.98955	0.968087	0.982355	1	1	0.989671	0.985443	1	0.969932	1	0.990639	0.982157	0.979476	1	0.968094	1	1
9.82365	9.41977	420.844	4.22002e-34	4.12718e-31	Gm29216		1	24615706	24616197	0.998807	0.999182	0.998952	0.999287	0.998592	0.997386	1	0.998128	0.999062	0.998773	0.999345	0.999426	0.999539	0.999814	0.999661	0.998927	0.998715	1	1	0.998137	0.998657	1	0.999397	1	0.999873	0.999228	0.999085	0.999532	1	1	0.999155	0.998346	0.998711	0.999542	0.999472	0.998495	0.999353	0.999374	0.999516	0.999483
-4.02641	3.28322	85.0795	2.50309e-14	1.51113e-12	Zdbf2	73884	1	63273265	63314576	0.112205	0.0651461	0.0225538	0.0645595	0.0488761	0.0203006	0.033664	0.0513389	0.171533	0.0676199	0.0264648	0.0366903	0	0.11876	0.0834676	0.0963035	0.0997058	0.056512	0.0979338	0	0	0.0264924	0.0310917	0.0394555	0.121243	0.135896	0.105297	0.0449829	0.0123922	0.0277924	0	0.01568	0.018982	0.0431643	0.179416	0.10336	0.0238016	0.0882184	0.101307	0.0796326
-7.91909	10.7602	1010.16	5.60699e-48	8.43636e-45	Sfmbt2	353282	2	10370510	10595253	0.00601426	0.00432087	0.00276244	0.00334865	0.00599363	0.00405994	0.00252854	0.00389537	0.0191536	0.0157545	0.00812301	0.0245717	0.0168614	0.00866696	0.00580465	0.00494301	0.00278723	0.00585534	0.00205899	0.00411115	0.00552888	0.00504534	0.00480408	0.0044749	0.442306	0.471566	0.363112	0.426582	0.250634	0.122263	0.405586	0.36728	0.380609	0.388507	0.315267	0.297544	0.00423465	0.00517905	0.00607827	0.00693127
-6.0567	1.43532	69.0567	2.30379e-11	1.07036e-09	Mir466m	100526481	2	10466663	10466746	0	0	0	0	0	0	0	0	0	0	0	0.139582	0	0	0	0	0	0	0	0	0	0	0	0	0.384792	0.767583	0.46884	0.458825	0.115187	0.209129	0.680253	1	0.231727	0.22056	0.280295	0.237364	0	0	0	0
-9.05115	3.66984	290.193	1.51402e-27	7.05102e-25	Mir466f-1	100124486	2	10466944	10467037	0	0	0	0	0	0	0	0	0	0.0656141	0	0	0.055071	0	0	0	0	0.052169	0	0	0	0	0	0.0144446	0.468625	0.557158	0.387664	0.468254	0.197537	0.193802	0.291277	0.283744	0.275837	0.390765	0.252165	0.213913	0	0	0	0.0734842
-8.01574	3.78252	322.983	3.83614e-29	2.20691e-26	Mir669f	100316667	2	10467229	10467349	0	0	0	0	0	0.0126294	0	0	0.0204962	0	0.0394457	0.162949	0	0	0.0195322	0	0	0	0.0475332	0	0	0	0	0	0.426948	0.550902	0.60941	0.508023	0.229322	0.152264	0.231394	0.37397	0.342186	0.36618	0.21052	0.314811	0	0.0226038	0	0
-8.57751	3.35243	435.738	1.32721e-31	1.08167e-28	Mir669e	100316806	2	10467495	10467613	0	0	0	0	0	0	0	0	0.0703316	0.0265825	0	0	0	0	0	0	0	0	0	0	0	0	0.0157913	0	0.43045	0.477029	0.244511	0.365356	0.297305	0.174607	0.265608	0.334128	0.290883	0.361408	0.310675	0.266876	0	0	0	0
-6.57427	3.32843	244.158	1.73818e-25	6.29606e-23	Mir669b	735255	2	10467790	10467886	0.0351752	0	0	0	0.0213992	0	0	0	0.0245972	0	0.0537177	0.0389757	0	0	0	0	0	0	0	0.0251158	0	0	0	0	0.360172	0.42515	0.265851	0.414014	0.316412	0.128088	0.515442	0.624999	0.397321	0.353206	0.277796	0.37525	0	0	0	0.0202708
-6.16985	2.43937	98.9011	4.80412e-15	3.16393e-13	Mir669d	100316664	2	10468343	10468463	0	0	0.0864277	0	0	0	0	0	0	0	0	0	0	0	0	0	0	0	0	0	0	0	0.021381	0	0.484058	0.509315	0.577203	0.64021	0.355404	0	0.290342	0.0855062	0.246022	0.244849	0.320685	0.310855	0	0	0.0951965	0.0796326
-7.95363	2.82338	229.755	1.42152e-22	3.15964e-20	Mir466f-2	100124445	2	10468675	10468768	0	0	0	0	0	0	0	0	0.115929	0	0	0.0464091	0	0	0.0319207	0	0	0	0	0	0	0	0	0	0.507879	0.287953	0.405682	0.429753	0.147904	0.0458726	0.387102	0.237375	0.364792	0.474301	0.33626	0.310855	0	0	0	0
-6.05364	2.57237	132.72	4.09021e-18	4.25281e-16	Mir669l	100316815	2	10468971	10469068	0.0559302	0	0	0	0	0	0	0	0.0895418	0	0	0.139582	0.0910757	0	0	0	0	0	0	0	0	0	0	0	0.355622	0.485492	0.290456	0.429753	0.302621	0.0555007	0.381129	0.401928	0.299375	0.35534	0.365875	0.341557	0	0	0.0316196	0
-6.72582	2.70917	223.843	5.62027e-24	1.57047e-21	Mir669d-2	100526550	2	10471644	10471729	0	0	0	0	0.035406	0	0	0	0.0895418	0	0.0537177	0	0	0	0	0	0	0	0	0	0	0	0	0	0.529598	0.52842	0.438238	0.389556	0.319105	0.174607	0.422405	0.502985	0.261243	0.401687	0.370482	0.313417	0	0	0.0452053	0
-7.03892	2.03104	89.1543	1.07063e-13	5.94927e-12	Mir466f-3	100124475	2	10471953	10472046	0	0	0	0	0	0	0	0	0.174063	0	0	1	0	0	0	0	0	0	0	0	0	0	0	0	0.621478	0.679807	0.37858	0.409727	0	0.110666	0.158049	0.240268	0.254753	0.433274	0.0940845	0.0493154	0	0.119296	0	0
-5.91455	2.76889	173.926	4.91241e-21	8.65646e-19	Mir297a-2	723945	2	10472254	10472343	0	0	0	0	0.0331237	0	0	0.0586612	0.0393652	0	0	0	0.114893	0	0.0342043	0	0	0	0	0	0	0	0	0	0.494692	0.471231	0.469343	0.567222	0.458342	0.190315	0.476925	0.196386	0.344125	0.373669	0.348158	0.187355	0	0	0	0
-6.78602	1.69403	93.703	1.38788e-13	7.64702e-12	Mir467c	100124487	2	10473931	10474027	0	0	0	0	0	0	0	0	0	0	0	0	0.322474	0	0.0639348	0	0	0	0	0	0	0	0	0	0.308802	0.266284	0.224625	0.585587	0.533931	0.283998	1	0.600857	0.430407	0.41634	0.372435	0.475833	0	0	0	0
-5.53092	2.2674	81.6066	8.1087e-14	4.53448e-12	Mir669k	100316663	2	10475300	10475426	0	0	0	0	0.0759738	0	0	0	0	0.109439	0.0968426	0	0	0	0	0.0740094	0	0.0581249	0	0.0856585	0	0.0382519	0	0.0335237	0.621478	0.629422	0.63617	0.508898	0.129511	0.186951	0.389589	0.138888	0.347151	0.216721	0.198253	0.152851	0.0596138	0	0	0
-4.72652	1.53701	76.8492	2.70374e-13	1.45289e-11	Mir467a-1	735286	2	10476346	10476418	0	0	0	0	0	0	0.104041	0.0466777	0	0.329557	0	0	0	0	0	0	0.0936815	0.126991	0	0	0.25656	0	0	0	0.353706	0.40263	0.320079	0.414014	0.221204	0.0956542	0.321008	0.306882	0.105808	0.39338	0.326445	0.365632	0	0	0	0
-6.88336	2.89441	127.207	1.11336e-17	1.02723e-15	Mir669j	100316770	2	10477910	10478030	0	0	0	0	0	0.0211286	0	0	0.0492147	0.042775	0	0.447858	0.0433637	0	0	0	0	0	0	0	0	0	0	0	0.581577	0.619062	0.668604	0.525136	0.0716199	0.0270809	0.2713	0.163532	0.244625	0.165019	0.0675621	0.153659	0	0	0	0
-6.49653	1.66145	104.14	6.41387e-15	4.12682e-13	Mir467e	100124448	2	10505721	10505807	0	0	0	0	0	0	0	0	0	0	0	0	0	0.045043	0	0	0	0	0	0	0	0.0736852	0	0.159098	0.563324	0.447149	0.135636	0.503598	0.245542	0.149867	0	0.331674	0.506298	0.358435	0.25716	0.383661	0	0	0	0
-5.34848	3.61787	161.062	4.51418e-21	8.10067e-19	Mir466p	100526497	2	10506006	10506094	0	0	0	0.0205298	0	0.05171	0.0946213	0	0.0690963	0	0	0	0.0173227	0	0	0	0.026146	0.0147533	0	0.057154	0.0272194	0	0.0162924	0.0442043	0.454145	0.418645	0.371244	0.409727	0.257694	0.153491	0.440164	0.468017	0.467049	0.32195	0.216883	0.24729	0.0153491	0.0186108	0.037957	0
-7.5963	2.49176	171.72	1.08277e-19	1.47077e-17	Mir466	723922	2	10507918	10507990	0	0	0	0	0	0	0	0	0.0820697	0	0	0.0464091	0	0	0	0	0	0	0	0	0	0	0	0	0.416848	0.614247	0.484939	0.507814	0.37615	0	0.285153	0.300751	0.410846	0.482886	0.434805	0.0705564	0	0	0	0
-7.14584	2.18678	148.997	1.8842e-17	1.65269e-15	Mir669c	735273	2	10509296	10509404	0	0	0	0	0	0	0	0	0	0	0	0	0	0	0	0	0	0	0	0	0	0.128714	0	0	0.252478	0.274017	0.360986	0.553924	0.384568	0.184774	0.424106	0.594529	0.483561	0.564641	0.415407	0.205951	0	0	0	0
-7.52791	2.44752	134.417	1.33734e-17	1.19992e-15	Mir669a-2	735258	2	10510164	10510260	0	0	0	0	0	0	0	0	0.101913	0	0	0.493249	0	0	0	0	0	0	0	0	0	0	0	0	0.696361	0.550902	0.503461	0.327622	0.396777	0.0842284	0.278922	0.253484	0.217016	0.424075	0.206122	0.147421	0.0501767	0	0	0
-6.06263	2.95339	186.631	3.41271e-22	7.33546e-20	Mir297b	735281	2	10511667	10511775	0	0	0.0315915	0	0.0270265	0.0295714	0	0	0.0953279	0	0	0	0.03815	0	0	0.0436764	0	0	0	0	0.0206913	0	0	0.018906	0.484058	0.56152	0.377048	0.522162	0.106364	0.0251492	0.375484	0.211864	0.303545	0.319438	0.198943	0.268025	0	0.0452635	0	0
-5.07494	1.74286	101.101	1.25327e-15	8.81796e-14	Mir466d	100124465	2	10511967	10512062	0	0	0	0	0.406588	0	0	0	0	0	0	0.195714	0	0	0	0	0	0	0	0	0	0.103059	0	0	0.484058	0.6113	0.216864	0.461321	0.286	0.3059	0.191191	0.323362	0.460798	0.535499	0.320685	0.256961	0	0	0	0
-5.99635	1.27506	106.911	2.41539e-14	1.4627e-12	Mir466n	100526524	2	10513741	10513834	0	0	0	0	0	0	0	0	0	0	0	0	0	0	0	0	0	0	0	0	0	0	0	0	0.584597	0.361497	0.247855	0.34636	0.159209	0.116775	0.553775	0.287355	0.440983	0.320477	0.437861	0.341557	0	0	0	0
-8.63783	3.33925	259.188	4.11412e-25	1.36951e-22	Mir669o	100316702	2	10514300	10514395	0	0	0	0	0	0	0	0	0	0.0383279	0	0.0975955	0	0.0188884	0	0	0	0	0	0.0374318	0	0	0	0	0.448461	0.514087	0.35513	0.429753	0.172385	0.107298	0.466956	0.232705	0.39997	0.265188	0.330349	0.18188	0	0.0237354	0	0
-7.21782	2.21964	143.076	6.7906e-18	6.60353e-16	Mir297a-3	100124482	2	10515820	10515921	0	0	0	0	0	0	0	0	0.123189	0	0	0	0	0	0	0	0	0	0	0	0	0	0	0	0.384792	0.653645	0.526673	0.56111	0.198696	0.0810032	0.313133	0.287355	0.204061	0.151009	0.158836	0.129079	0.0596138	0	0	0
-6.57747	2.52667	161.56	8.84278e-20	1.2267e-17	Mir466l	100316769	2	10516097	10516217	0	0	0	0	0	0.0689053	0	0	0	0	0	0	0.151452	0	0	0	0	0	0	0	0	0	0.0341981	0	0.61356	0.653645	0.367699	0.385758	0.409788	0.149867	0.335051	0.479615	0.305317	0.297117	0.32402	0.35978	0	0	0	0
-7.50044	3.98898	237.297	5.76029e-26	2.29941e-23	Mir297a-4	100124435	2	10517067	10517164	0	0	0	0.0192714	0	0.0112572	0	0	0.0124517	0	0.0261068	0	0	0.0124218	0	0	0	0	0.0132175	0	0	0	0.00950562	0	0.588416	0.640072	0.446059	0.551316	0.215749	0.0714301	0.321008	0.256848	0.28245	0.256978	0.164	0.145541	0	0	0	0
-6.6044	3.81764	217.408	1.97328e-24	6.12657e-22	Mir669i	100316668	2	10517604	10517730	0	0	0.0172176	0	0.0193815	0	0	0.0263457	0	0.042775	0	0.108472	0	0.038332	0	0	0	0	0	0	0.00958296	0.00898956	0.0175451	0.0259885	0.40293	0.546633	0.429619	0.445987	0.150967	0.171076	0.332722	0.202976	0.338955	0.373808	0.181222	0.14935	0	0	0.016628	0
-6.26223	1.51577	135.116	1.37011e-16	1.07197e-14	Mir669h	100316831	2	10518155	10518279	0	0	0	0	0	0	0	0	0	0.0757217	0	0	0	0	0	0	0	0	0	0	0	0	0	0	0.484058	0.447149	0.484939	0.255153	0.609708	0.149867	0.431757	0.281095	0.338955	0.599793	0.46394	0.535477	0	0	0	0
4.57377	12.2605	30.216	4.2325e-07	1.48899e-05	Gm13340		2	22588103	22589647	0.825571	0.825903	0.831642	0.833064	0.999442	0.999539	0.99938	0.999512	0.815629	0.697448	0.810904	0.667563	0.80737	0.813586	0.818867	0.8309	0.999317	0.999325	0.999671	0.999478	0.999414	0.999504	0.999389	0.999318	0.862014	0.862303	0.804388	0.816262	0.999593	0.999091	0.999436	0.999374	0.999735	0.999317	0.999383	0.999569	0.857644	0.865555	0.810757	0.814584
9.5015	8.59915	74.8549	3.45446e-13	1.83114e-11	Gm13339		2	22590024	22590533	0.979063	0.898406	1	0.941296	1	1	0.999636	0.998329	0.958527	0.848891	0.959421	0.899218	1	0.987682	0.981984	0.991314	0.999737	0.999638	0.999132	0.997092	0.999506	0.999691	1	1	0.982255	0.984197	0.941999	0.984849	0.999795	0.998827	0.999725	0.999779	0.99946	1	0.999555	0.99973	0.941743	0.985948	0.962359	0.955386
6.5449	2.08736	15.8534	0.000198308	0.00540238	Erv3	71995	2	131853678	131859747	1	1	1	1	1	1	1	1	0.917669	1	0.62809	1	1	1	1	1	1	1	1	1	#NUM!	1	1	1	1	1	0.992678	1	1	0.514025	1	1	1	#NUM!	1	0	1	1	1	1
-1.0385	3.13818	17.6203	6.78049e-05	0.00195039	Mcts2	66405	2	152687035	152687946	0.436795	0.229039	0.255961	0.367263	0.204416	0.544515	0.311264	0.329651	0.343174	0.261998	0.176584	0.317199	0.124947	0.333846	0.284911	0.0671051	0.292516	0.299232	0.229556	0.30635	0.408353	0.375175	0.354882	0.405388	0.208044	0.320561	0.214173	0.238972	0.526266	0.49678	0.364183	0.434404	0.238589	0.287494	0.67502	0.156981	0.264596	0.321617	0.274713	0.218705
-1.48164	3.96159	36.4729	4.29006e-08	1.62309e-06	Nnat	18111	2	157560078	157562522	0.339256	0.315611	0.304581	0.282126	0.291334	0.115942	0.217081	0.25253	0.576584	0.216348	0.299153	0.108472	0.371403	0.408374	0.258005	0.428766	0.292516	0.291218	0.177544	0.602963	0.239596	0.246685	0.289371	0.218848	0.46487	0.465532	0.604738	0.432349	0.234486	0.281479	0.261763	0.111568	0.43903	0.368539	0.337169	0.387069	0.15979	0.161101	0.228341	0.376383
-6.47174	4.65565	447.186	5.14399e-35	5.5898e-32	Nespas	56802	2	174281237	174295436	0.0142653	0.00672256	0.012623	0.00608743	0.00708661	0.00729438	0.00822623	0.0197629	0.0393652	0.0450134	0.0137932	0.0716295	0	0.0213058	0.0277518	0	0	0.0143378	0.0149407	0.0171665	0.0131826	0.0187903	0.0154353	0.014857	0	0.0173318	0.00826317	0.0542315	0.0264499	0.0470982	0	0.0290022	0	0.0246818	0.0488996	0	0.0284266	0.0293725	0.0341267	0.0317761
4.72113	2.27824	39.8155	1.67653e-08	6.50653e-07	Gm8775		3	4211718	4213044	0.739834	0.714994	1	1	1	1	1	1	0.710874	1	1	1	1	0.452185	0.827023	1	1	1	1	1	1	1	1	1	0.911662	1	1	1	0.946538	0.938789	1	1	1	1	1	1	0.516851	0.486703	1	1
-1.05524	3.5527	26.6944	1.63415e-06	5.41762e-05	Platr4	78706	3	41484024	41493192	0.369799	0.179508	0.348415	0.49758	0.339445	0.373331	0.305576	0.21519	0.593209	0.511532	0.62942	0.500098	0.322474	0.190832	0.139978	0.442056	0.362451	0.196386	0.340234	0.323618	0.21635	0.27943	0.224582	0.284628	0.671006	0.59723	0.506687	0.500702	0.488405	0.365017	0.367176	0.648297	0.487773	0.41683	0.549066	0.493567	0.368211	0.340888	0.33261	0.331063
-2.45187	8.44156	200.178	9.47541e-24	2.53889e-21	Jade1	269424	3	41555731	41616864	0.171266	0.179681	0.220768	0.192145	0.13004	0.121416	0.105008	0.12448	0.283552	0.252657	0.544036	0.400943	0.165048	0.127471	0.270177	0.173747	0.10436	0.0879857	0.0906504	0.121117	0.111582	0.131566	0.101718	0.120537	0.535461	0.503353	0.526613	0.534319	0.451513	0.452257	0.475372	0.488643	0.46107	0.458621	0.467434	0.438149	0.185849	0.178109	0.216394	0.235374
3.07803	1.08956	15.2184	0.000199541	0.00542841	Tdo2	56720	3	81957090	81976202	1	1	1	0.738877	0.860462	1	0.511027	1	1	1	1	1	0	1	1	1	0.756154	1	0.643483	0.911545	#NUM!	#NUM!	0.959379	1	0.918423	1	1	0.758461	1	0.413539	0.515442	0.349649	0.62133	0.633602	0.480023	0	1	1	1	1
2.97537	5.08872	32.4788	2.36595e-07	8.53836e-06	Gm11407		4	80002331	80003388	0.673531	0.760032	0.808966	0.689922	1	0.995124	1	1	0.787279	0.710795	0.773487	0.645295	0.804119	0.785974	0.791408	0.805221	1	1	1	1	1	1	1	1	0.853752	0.888168	0.783532	0.777728	1	1	1	1	1	1	1	1	0.828582	0.871954	0.773185	0.788157
2.94204	4.02904	28.1622	1.05929e-06	3.58472e-05	Gm11410		4	80003989	80005131	1	1	1	1	0.837101	0.790867	0.88573	0.844401	1	1	1	1	1	1	1	1	0.840689	0.705073	0.841129	0.755594	0.727707	0.701802	0.854882	0.835889	0.97525	1	1	1	0.776363	0.764789	0.785117	0.836609	0.825094	0.801121	0.796125	0.770459	1	1	1	1
-0.873604	4.63929	19.4033	3.16128e-05	0.000944041	C330024D21Rik	320479	5	67463897	67477632	0.507102	0.28254	0.389829	0.334321	0.336665	0.374112	0.220451	0.30245	0.205599	0.410285	0.383552	0.331071	0.370381	0.325904	0.387285	0.330895	0.447562	0.210785	0.44919	0.331629	0.311089	0.335907	0.284587	0.21906	0.522575	0.501623	0.39725	0.538042	0.428522	0.489873	0.442933	0.405908	0.381685	0.408882	0.416572	0.433471	0.458065	0.203366	0.434551	0.272691
4.03241	2.41669	16.0723	0.000163333	0.00449972	Spp1	20750	5	104435118	104441050	0.825769	0.924414	1	0.882981	1	1	1	1	1	0.938416	1	0.91799	1	1	1	1	1	1	1	1	1	1	1	1	1	1	1	1	1	1	1	1	1	1	1	1	1	0.654741	0.825619	1
-2.68123	5.34537	81.1803	6.67654e-14	3.84097e-12	Sgce	20392	6	4674350	4747207	0.0757148	0.184023	0.16291	0.158703	0.175709	0.0948347	0.143261	0.0688361	0.052266	0.242039	0.125667	0.174597	0.035319	0.127451	0.144852	0.0900847	0.0775218	0.00640333	0.0902234	0.0527644	0.0787122	0.086894	0.0341981	0.17911	0.0513477	0.117381	0.103288	0.079839	0.111754	0.171076	0.238306	0.310446	0.0399153	0.138418	0.0978156	0.10336	0.241954	0.228	0.170856	0.124383
-8.4829	12.6114	372.707	2.67213e-32	2.27247e-29	Peg10	170676	6	4747306	4760517	0.00411704	0.00304962	0.00186514	0.00237245	0.00261657	0.00304812	0.00227545	0.00281288	0.00316068	0.00115386	0.00361289	0.00160777	0.00206149	0.00346696	0.00231966	0.00396627	0.00253368	0.00216037	0.00175401	0.00210266	0.00228142	0.00205154	0.00316418	0.00286461	0.00331012	0.00298432	0.00318651	0.0033204	0.00300391	0.00360419	0.00285893	0.00292559	0.00239538	0.00351979	0.0042184	0.00250557	0.00270716	0.00252133	0.00276917	0.00432994
1.42197	5.98596	76.7484	2.09729e-13	1.13953e-11	Ppp1r9a	243725	6	4902917	5165661	0.691248	0.709806	0.735379	0.796003	0.739918	0.726396	0.692074	0.735098	0.703486	0.747145	0.726718	0.854765	0.761928	0.694029	0.781122	0.766251	0.67517	0.702358	0.752329	0.7842	0.72694	0.796822	0.719665	0.697724	0.767435	0.790551	0.743788	0.787475	0.766139	0.783852	0.781718	0.791451	0.760261	0.743581	0.800575	0.771905	0.76625	0.671605	0.744231	0.785635
2.82746	6.07638	27.446	1.21986e-06	4.09973e-05	Asb4	65255	6	5383386	5433022	0.82993	0.928865	0.870177	0.891808	0.860144	0.849788	0.900014	0.845771	0.721666	0.908306	0.920512	0.922588	0.856104	0.872639	0.883634	0.944763	0.868035	0.924351	0.871155	0.975722	0.767313	0.812522	0.830298	0.822529	1	0.823496	0.97281	0.899056	0.847153	0.873018	0.899144	0.892969	0.974322	0.811898	0.881372	1	0.891902	0.883871	0.905274	0.8975
-6.53628	6.27876	169.441	1.11196e-21	2.2481e-19	Mest	17294	6	30723547	30748465	0.0122129	0.00978523	0.0079871	0.00661003	0.014046	0.012972	0.0127072	0.00541092	0.0289399	0.00481481	0.0121595	0.00858539	0.0250821	0.00262813	0.0122662	0.00494483	0	0.0121194	0.00557407	0.0190728	0.0202293	0.0150159	0.0124177	0.00734328	0	0.0195457	0.0196389	0.018224	0.0110745	0.0163419	0.0189399	0.0149404	0.0113913	0.0051355	0.0437235	0	0.00858329	0.00832122	0.0125971	0.00865606
3.32643	2.51298	27.0588	1.41776e-06	4.73231e-05	Klf14	619665	6	30956023	30959078	1	1	1	0.796233	0.963927	0.89234	0.819128	1	1	0.944316	0.928714	0.931633	1	0.964736	1	1	0.870445	0.670673	1	1	1	0.949016	1	0.929483	1	0.767583	1	0.824874	0.975971	0.915552	0.966354	0.877087	1	1	0.838522	1	0.96183	0.946067	0.899	1
3.05815	4.48756	22.5283	8.62306e-06	0.000269006	A2m	232345	6	121635376	121679227	0.944636	0.869636	0.621184	0.784394	0.736121	0.896663	0.916483	0.995161	0.867664	0.646113	0.809797	0.488746	0.791999	0.5481	0.713153	0.418375	0.933891	0.957268	0.994758	0.992235	0.931815	0.831903	0.994176	0.685118	0.896398	0.68767	0.921907	0.836278	0.942965	0.626852	0.66185	0.744805	0.983512	0.956119	0.7928	0.935586	0.926209	0.415595	0.830855	0.847372
4.86309	6.4129	278.95	3.65468e-28	1.78714e-25	Zim1	22776	7	6671269	6696450	0.971909	0.974729	0.972936	0.981338	0.97196	0.968198	0.96166	0.920501	0.949203	0.987136	0.970494	0.99042	0.975878	0.979638	0.961846	0.954572	0.957736	0.985916	0.965581	0.985998	0.960054	0.972146	0.9558	0.978223	0.962904	0.97883	0.967079	0.960628	0.958368	0.977908	0.968506	0.968988	0.975982	0.943962	0.949428	0.965706	0.975218	0.977886	0.975162	0.958499
-8.39438	10.4257	345.035	3.55778e-31	2.67654e-28	Peg3	18616	7	6703892	6730431	0.0035299	0.00374531	0.00225661	0.00293098	0.00286026	0.0027534	0.00237915	0.00276331	0.0169508	0.0141215	0.00230391	0.0275686	0.00170609	0.00254769	0.00158289	0.00214582	0.00361839	0.00203823	0.00251055	0.00457347	0.000996562	0.00346425	0.00314452	0.00400338	0.00257168	0.00357318	0.00378454	0.00509761	0.00527822	0.00807987	0.00519967	0.00551552	0.00152204	0.00326651	0.00577295	0.00484912	0.00271573	0.0017996	0.00285675	0.00146081
-3.49778	1.85871	48.0098	1.00634e-09	4.21498e-08	Usp29	57775	7	6730578	6967219	0.0528139	0	0	0.129623	0	0.103234	0.207152	0.170569	0	0.300752	0	0.0713602	0	0	0	0	0.205348	0.126991	0.720549	0.204853	0	0	0.278016	0.206443	0.135223	0.653645	0.370455	0.178572	0.12193	0.174607	0.0784249	0.114285	0.450673	0.108787	0.193332	0.425634	0	0	0.159227	0.169398
-1.42113	6.50013	165.696	2.0678e-21	4.08547e-19	Snhg14	16353	7	59307924	59975759	0.239224	0.275589	0.210157	0.260725	0.345023	0.240028	0.288488	0.336878	0.279502	0.234699	0.271556	0.200336	0.264364	0.200899	0.276347	0.246297	0.355967	0.227077	0.301477	0.217264	0.263038	0.261825	0.251384	0.234337	0.276423	0.24581	0.222727	0.228921	0.274948	0.24696	0.27287	0.292815	0.267199	0.269391	0.265909	0.30491	0.235265	0.262121	0.248497	0.308997
-7.03391	5.3003	534.44	5.53907e-37	6.77151e-34	Snrpn	20646	7	59982495	60140219	0.0161717	0.0103448	0.0105179	0.015735	0	0	0	0	0.00468361	0.00983269	0.0082861	0.0332127	0.0135436	0.0292702	0.028869	0.018638	0	0	0	0	0	0.00478677	0.0047755	0	0.0132881	0.00443125	0.0282952	0.012683	0.0200121	0	0.00827399	0.00411859	0.00361063	0	0	0	0.00980799	0.0228765	0.00493319	0
-2.74135	2.19129	25.7574	2.36037e-06	7.72055e-05	Ndn	17984	7	62346569	62350262	0.15091	0.238725	0.0864277	0.168133	0.106015	0.128927	0.0496601	0.128077	0.211494	0.042775	0	0.0718619	0.174602	0.224964	0	0	0	0.253406	0.255838	0.451878	0	0.508383	0.185795	0	0.0673115	0.0790051	0	0.0525043	0.0556688	0.0220093	0	0	0	0.114806	0	0.315583	0.208947	0.0929761	0	0
6.09547	2.17372	33.9714	2.84128e-07	1.01601e-05	Hbb-bt	101488143	7	103812524	103813996	1	1	1	1	1	1	1	1	1	1	1	0.708742	#NUM!	1	1	1	1	1	1	1	1	1	1	1	1	1	0.973488	0.986401	1	0.873018	1	1	1	1	1	1	1	1	1	1
5.85059	12.9184	281.578	2.70926e-28	1.3588e-25	H19	14955	7	142575529	142578143	0.992863	0.991282	0.990121	0.990279	0.976458	0.945288	0.99048	0.98844	0.902885	0.971204	0.984079	0.990198	0.994679	0.992124	0.987638	0.991846	0.990882	0.994522	0.992727	0.992201	0.992731	0.993268	0.993697	0.991354	0.973769	0.985422	0.943272	0.957902	0.95657	0.942573	0.956045	0.953326	0.971394	0.959616	0.9593	0.932118	0.994593	0.995142	0.990223	0.988777
6.05434	8.6007	342.289	4.64235e-31	3.36312e-28	Gm27483		7	142576853	142576923	0.99426	0.992594	0.988635	0.99157	0.980546	0.954987	0.995777	0.990786	0.905522	0.961908	0.987022	0.991186	0.99842	0.989032	0.990315	0.990678	0.995267	0.992158	0.991691	0.993846	0.99438	0.994173	0.993683	0.993608	0.979214	0.98687	0.93511	0.965981	0.954112	0.953421	0.94885	0.957854	0.977686	0.965268	0.961869	0.938645	0.991948	0.997105	0.988772	0.986784
5.79608	9.72718	250.253	1.1155e-26	4.7433e-24	Gm27786		7	142577849	142577918	0.993115	0.99494	0.989182	0.991088	0.971886	0.942475	0.993346	0.987821	0.909102	0.976941	0.983112	0.991225	0.995748	0.994866	0.989506	0.99223	0.988946	0.994714	0.991225	0.994424	0.991342	0.992325	0.995879	0.989753	0.973096	0.986915	0.949596	0.956145	0.956775	0.935953	0.956008	0.951466	0.968804	0.952908	0.963941	0.928826	0.99525	0.993857	0.988617	0.987315
-3.53819	10.7115	193.744	2.45686e-23	5.93286e-21	Igf2	16002	7	142650766	142666816	0.115727	0.0922301	0.0744197	0.0848767	0.0538229	0.0625362	0.0676398	0.0815716	0.138808	0.0642957	0.103082	0.0123555	0.0829086	0.0874964	0.110235	0.120432	0.102757	0.0551634	0.091037	0.0538885	0.0774986	0.0537122	0.0517415	0.0521898	0.0506157	0.052093	0.0450815	0.0472557	0.0122981	0.0191849	0.0177797	0.01289	0.0184133	0.0197259	0.0156999	0.0252654	0.0917933	0.0793458	0.0824024	0.0920527
-2.49588	6.02478	123.457	4.72948e-18	4.79319e-16	Igf2os	111975	7	142659693	142670356	0.244573	0.206199	0.115326	0.2216	0.102747	0.106143	0.113501	0.094555	0.228283	0.190106	0.145519	0.0225006	0.193347	0.168632	0.175028	0.172527	0.116473	0.100801	0.157911	0.0869149	0.10739	0.111085	0.10385	0.127654	0.15687	0.156623	0.0899832	0.101449	0.016416	0.0282376	0.0606658	0.0521755	0.0363144	0.0361048	0.0331047	0.0328965	0.163218	0.238897	0.183428	0.170082
3.78592	2.11002	29.0073	7.71296e-07	2.64213e-05	Th	21823	7	142892752	142931128	1	0.484738	1	1	1	1	1	1	0.887233	1	1	1	1	1	1	1	1	0.906309	1	1	1	0.608021	0.951244	1	0.548775	0.756122	0.71674	0.614526	0.765981	0.783852	1	0.950871	0.851695	0.834933	0.886224	0.873681	1	1	0.86891	1
6.53604	6.10924	150.531	2.81852e-20	4.24079e-18	Ascl2	17173	7	142966829	142969264	0.981828	0.965999	0.991965	0.993228	0.985385	0.995381	1	0.993844	0.937355	0.932903	0.983403	0.958113	0.950096	0.977096	0.992603	0.988983	0.985696	0.914997	1	0.992828	0.990115	0.888069	0.984412	0.997597	0.755261	0.778258	0.835962	0.873873	0.746698	0.834429	0.852988	0.936287	0.740866	0.821791	0.836452	0.813766	0.976204	0.922601	0.993402	0.991708
2.52906	2.02579	26.3689	1.85605e-06	6.14285e-05	Cd81	12520	7	143052739	143067934	1	1	0.947298	0.781859	0.774055	0.644522	0.676397	1	0.970963	0.830953	0.906107	0.731572	1	0.964736	1	0.861766	0.67398	0.717962	0.918997	0.673313	0.911917	0.77513	0.89148	0.649117	0.816731	0.883025	1	0.963473	0.257694	0.47551	0.577642	0.300751	0.845426	0.67481	0.446831	0.919434	0.74044	0.941586	0.883386	1
4.20247	3.40893	40.5822	1.02299e-08	3.99393e-07	Trpm5	56843	7	143069153	143094642	0.943144	1	0.977049	1	0.965217	0.914574	0.931443	0.911365	0.970109	0.830953	1	0.81957	0.826376	0.825076	1	1	0.961252	0.880297	1	1	0.93546	0.870495	1	0.931166	0.638182	0.886166	0.756514	0.801481	0.625418	0.713108	0.852988	0.744805	0.649435	0.575073	0.798411	0.800461	0.900334	0.908726	0.952119	0.875667
3.75017	3.1174	119.53	1.05177e-17	9.84336e-16	Tssc4	56844	7	143069249	143071093	0.955213	0.96578	0.979695	0.931126	0.881674	0.970721	0.901426	0.856399	1	0.873124	1	0.817433	0.916959	0.918833	0.94783	0.974596	0.854171	0.843313	0.796716	0.878251	0.850616	0.841728	0.955682	0.717807	0.826076	0.835306	0.79524	0.89853	0.476789	0.559328	0.680253	0.811358	0.74255	0.530028	0.656727	0.763464	0.866061	0.95554	0.929858	0.961158
4.81066	0.5622	31.2642	6.85841e-07	2.3618e-05	Kcnq1	16535	7	143106362	143427042	1	1	1	1	1	1	1	1	1	1	1	1	1	1	1	1	1	0.50452	1	0.632018	1	1	1	1	1	1	1	0.653268	1	0.808827	1	0.263851	1	0.67481	1	0.756834	1	1	#NUM!	1
7.46542	8.83187	298.437	4.17602e-29	2.3338e-26	Cdkn1c	12577	7	143458339	143461050	0.991736	0.993742	0.995401	0.99646	0.995702	0.9951	0.990894	0.994562	0.99708	0.974516	0.998028	0.984469	0.973537	0.994596	0.993873	0.997238	0.991287	0.992888	0.997491	0.999012	0.997518	0.989861	0.996491	0.996306	0.883231	0.98508	0.991278	0.959412	0.981674	0.983011	0.993815	0.996134	0.989062	0.98612	0.985115	0.989742	0.995277	0.995877	0.994155	0.997705
3.1111	5.40685	51.2656	3.08575e-10	1.32945e-08	Slc22a18	18400	7	143473736	143499334	0.87459	0.849501	0.904401	0.745591	0.966647	0.969567	0.989363	0.990993	0.949203	0.816198	0.876191	0.823586	0.833065	0.89125	0.777154	0.857027	0.952148	1	0.982981	0.961901	0.868594	0.97984	0.983202	0.941174	0.687133	0.719064	0.627115	0.697613	0.736881	0.858237	0.775329	0.770468	0.813504	0.847523	0.867082	0.868738	0.813227	0.815357	0.85939	0.84613
4.36913	8.25263	214.855	1.16714e-24	3.74251e-22	Phlda2	22113	7	143501545	143503150	0.954752	0.921481	0.938615	0.915415	0.966307	0.979437	0.962813	0.981319	0.947351	0.880051	0.954496	0.888459	0.831324	0.932179	0.930384	0.937763	0.978074	0.981907	0.979836	0.974059	0.975689	0.95917	0.975407	0.968138	0.694557	0.706079	0.740761	0.73635	0.812072	0.825878	0.839135	0.837064	0.786523	0.81068	0.821126	0.845519	0.928827	0.906707	0.950749	0.955678
1.91246	1.5961	21.5181	1.30568e-05	0.000400928	Tnfrsf22	79202	7	143634806	143649661	0.612378	0.814479	0.850215	0.79048	0.804344	0.861427	0.785309	0.849743	0.887233	0.761626	0.920512	0.773075	0.804877	0.825076	0.656646	0.817378	0.935363	0.640538	0.891904	1	0.838096	0.674077	0.911258	0.925855	0.701091	0.803496	0.724991	1	0.62072	0.760373	0.459748	0.682593	0.406061	0.509218	0.892571	1	0.895376	0.64001	1	0.89546
2.24108	3.53171	42.1126	6.07681e-09	2.42576e-07	Osbpl5	79196	7	143688762	143756985	0.825769	0.657265	0.863982	0.775705	0.869799	0.846759	0.965774	1	0.904825	0.675666	0.890186	0.669375	0.807263	0.810655	0.849437	0.842359	0.823053	0.866512	1	0.86834	0.60094	0.705429	0.863617	0.829238	0.704544	0.699813	0.647664	0.614994	0.757539	0.808827	0.877183	0.84317	0.715159	0.780575	0.593574	0.628879	0.784049	0.791352	0.89753	0.763925
2.62335	0.981676	14.8927	0.000236428	0.00636111	Shank2	210274	7	144001928	144424494	1	1	1	1	1	0.878824	1	0.435402	0.424497	0.797259	#NUM!	0.708742	1	0.738907	0.919838	1	1	1	1	1	#NUM!	0.340827	0.860358	1	0.808499	0.904178	0.849604	0.809129	0.946538	1	1	1	1	1	1	1	0.487414	0.791352	1	0.487639
-1.68549	8.76714	195.244	1.96345e-23	4.92372e-21	Gab1	14388	8	80764438	80880519	0.257898	0.254156	0.22276	0.273868	0.249815	0.213671	0.222631	0.19354	0.517448	0.386452	0.474091	0.459324	0.209124	0.2277	0.204259	0.216748	0.206997	0.188776	0.211164	0.175579	0.215569	0.191406	0.17535	0.207251	0.466896	0.482707	0.498799	0.483487	0.481529	0.48232	0.497122	0.51495	0.492321	0.415771	0.519435	0.494571	0.344797	0.243123	0.258938	0.23585
-1.95249	6.67969	82.4085	4.88916e-14	2.86324e-12	Sall1	58198	8	89027235	89044162	0.256765	0.231157	0.286352	0.266048	0.181913	0.144147	0.14112	0.144512	0.37875	0.12063	0.238832	0.196769	0.26232	0.286324	0.197873	0.24755	0.0979953	0.134162	0.173051	0.163978	0.221558	0.203294	0.143272	0.161663	0.489221	0.42268	0.592218	0.568974	0.354655	0.33388	0.424156	0.368432	0.338335	0.392697	0.427245	0.316347	0.263564	0.315202	0.253205	0.245819
6.52386	5.50255	197.984	1.30791e-23	3.45711e-21	Gm9797		10	11609223	11609835	0.987597	0.992596	1	1	0.956118	1	0.995996	0.984115	0.996655	0.946512	1	1	0.992104	0.957569	1	1	1	1	0.996327	1	0.934689	0.977049	0.992704	0.986505	0.995367	0.985881	1	1	0.931219	0.916791	0.991126	0.97259	0.978238	0.984016	0.994163	0.994644	0.954047	0.866228	1	1
-5.98729	6.91974	243.042	2.75897e-26	1.1482e-23	Plagl1	22634	10	13060504	13131694	0.0115671	0.0153812	0.0134825	0.0188276	0.0142491	0.0143032	0.0189863	0.0150264	0.00906571	0.00794412	0.00991157	0.0107065	0.00930648	0.012992	0.00594089	0.0111901	0.0130456	0.00506544	0.0397594	0.00673405	0.00907875	0.00850877	0.0134008	0.0146956	0.0179773	0.0120036	0.0120798	0.00289908	0.0183022	0.0192379	0.0268188	0.0189351	0.0113913	0.00662117	0.0200861	0.0129086	0.00838682	0.00727268	0.0113475	0.0255438
6.20272	8.21781	497.882	1.18556e-36	1.36409e-33	Grb10	14783	11	11930508	12038683	0.983552	0.97132	0.986805	0.984656	0.989113	0.98987	0.991774	0.994278	0.990562	0.976508	0.981341	0.966395	0.966575	0.990546	0.969283	0.985827	0.988946	0.986261	0.995943	0.984457	0.991866	0.992921	0.991208	0.992344	0.991754	0.994892	0.995939	0.990382	0.99159	0.992712	0.990948	0.9891	0.99095	0.990575	0.99449	0.997569	0.974067	0.981434	0.97707	0.980926
-2.54042	3.45723	96.8536	1.48185e-15	1.03149e-13	Zrsr1	22183	11	22972005	22976496	0.196541	0.363121	0.129222	0.143602	0.136529	0.0339292	0.0485076	0.128077	0.256808	0.185814	0.265726	0.474743	0.192232	0.212306	0.205365	0.171755	0.176637	0.0847251	0.0779494	0.186333	0.0924211	0.0883793	0.154954	0.178847	0.0827469	0.210201	0.26315	0.142545	0.0943225	0.0877212	0.0738855	0.219735	0.138107	0.0154774	0.178559	0.076075	0.149726	0.191623	0.141395	0.13978
-2.06141	1.31972	17.3739	7.77339e-05	0.00222292	Gm12569	622699	11	51220473	51235053	0	0.17291	0.296004	0.273932	0.291334	0.147251	0.207152	0	0.38068	0.179297	0.161783	0.350966	0	0	0.323461	0.242251	0.279341	0	0.204989	0	0	0	0	0	0.21964	0.485492	0.484939	0.715269	0.480719	0.552373	0.515442	0.682593	0.535683	0.784086	0.700308	0.40886	0.06816	0.119296	0	0.487639
7.75295	6.47146	114.815	2.80439e-17	2.40587e-15	Gm11512		11	90538484	90539146	0.961481	0.934639	1	1	0.998331	0.998515	0.998373	0.99849	0.972155	0.877701	0.988741	0.903327	0.961637	0.985877	0.945091	1	0.996801	0.998286	0.998461	0.995195	0.991847	1	1	1	0.967437	0.991246	0.975046	1	0.999089	1	1	0.99558	1	1	0.996064	0.994421	0.966669	0.981834	0.971501	0.98779
-2.97686	2.44792	30.1681	4.3096e-07	1.51339e-05	2410003L11Rik	69729	11	97598511	97622893	0.400877	0.135541	0.0632971	0.190809	0.0683905	0.035682	0	0	0.648386	0.620997	0.491105	0.593501	0.322474	0.0631285	0.106766	0.619839	0.0382356	0	0	0	0	0.0503604	0	0	0.652344	0.805896	0.690987	0.687312	0.300129	0.392608	0.23679	0.309405	0.338955	0.265188	0.302033	0.276529	0.341529	0.321617	0.159227	0.375431
-0.68053	7.65706	30.298	4.10385e-07	1.44894e-05	Epop	103551	11	97627389	97629702	0.431902	0.39695	0.408689	0.389115	0.375511	0.376547	0.329888	0.350745	0.535413	0.455993	0.499077	0.424461	0.463583	0.418204	0.410136	0.457493	0.387248	0.333817	0.341424	0.258451	0.417374	0.37783	0.259375	0.334165	0.486318	0.485115	0.477574	0.490516	0.483433	0.523985	0.496124	0.45483	0.477101	0.483031	0.476602	0.49119	0.430288	0.437829	0.372805	0.421702
-2.22083	6.69351	128.429	1.75718e-18	1.90787e-16	Smoc1	64075	12	81026808	81186414	0.137649	0.176757	0.109928	0.127813	0.246663	0.192686	0.169233	0.234083	0.204108	0.198417	0.518376	0.284618	0.14145	0.086643	0.138729	0.0648369	0.203223	0.126223	0.179868	0.191664	0.138662	0.200443	0.138603	0.221552	0.500034	0.496749	0.508206	0.483182	0.482451	0.504268	0.497778	0.513075	0.490294	0.46812	0.469681	0.468838	0.243879	0.145829	0.089619	0.0816092
-5.28837	4.72605	153.748	1.59685e-20	2.53938e-18	Dlk1	13386	12	109452823	109463336	0.0123187	0.0410082	0.0395072	0.0223544	0.0130878	0	0.00705935	0.0570343	0.0209325	0.00862499	0.0224611	0.00666803	0	0.0230404	0	0.0674987	0.0412904	0.126991	0	0.049001	0.0106693	0	0	0.0153502	0.0293755	0.0806942	0.037749	0.0424492	0.0261546	0.0237001	0.0113489	0.0167233	0.0330538	0	0.0148284	0	0.0283418	0.0284899	0.0267891	0.0295558
4.69644	7.4546	103.257	3.44516e-16	2.59182e-14	Meg3	17263	12	109541001	109571726	0.998394	0.992444	0.996945	0.987031	0.912865	0.927842	0.951099	0.966727	0.935589	0.993653	0.998908	0.996289	0.946175	0.995547	0.983115	0.975146	0.920906	0.914468	0.923075	0.961901	0.935652	0.933157	0.955532	0.967451	0.978921	0.996147	0.991334	0.982389	0.99201	0.99335	0.989715	0.992348	0.952818	0.98343	0.996359	1	0.989706	0.996401	0.994577	1
3.45792	0.179182	13.4232	0.00055104	0.0141634	Gm27596		12	109541168	109541250	1	1	1	1	1	1	0.676397	1	#NUM!	#NUM!	1	1	#NUM!	1	#NUM!	1	1	#NUM!	0	1	1	1	1	1	#NUM!	#NUM!	#NUM!	1	1	1	1	1	#NUM!	1	1	#NUM!	#NUM!	1	1	#NUM!
4.29866	4.75915	90.1359	1.02246e-14	6.43065e-13	Gm26906		12	109568628	109571723	0.986655	0.988327	1	0.995047	0.911328	0.870708	0.923424	0.960528	1	1	1	1	1	1	0.989334	0.974902	0.900726	0.924351	0.899877	1	0.967108	0.892861	0.95465	0.974396	0.968712	1	1	1	0.991611	1	0.989249	0.993158	1	0.974613	1	1	0.979128	1	1	1
5.00675	0.17919	27.4203	2.52427e-06	8.24285e-05	Mir540	723880	12	109586080	109586146	1	1	1	1	1	1	1	1	#NUM!	1	#NUM!	1	#NUM!	1	#NUM!	0.48956	#NUM!	1	1	#NUM!	#NUM!	1	1	#NUM!	1	#NUM!	1	0.653268	0.80642	1	1	1	1	#NUM!	#NUM!	1	#NUM!	#NUM!	1	1
4.3266	0.930331	32.0279	2.86862e-07	1.02391e-05	Mir3070b	100526519	12	109588592	109588680	1	1	1	1	1	1	0.86246	0.878013	#NUM!	1	1	0.910875	1	1	1	#NUM!	0.805243	#NUM!	1	1	0.67433	1	1	1	1	1	1	1	1	1	0.955106	1	1	1	1	1	1	0.791352	1	#NUM!
3.5193	4.83582	96.5294	1.59768e-15	1.10818e-13	Rtl1	353326	12	109589193	109600330	0.940149	0.948307	0.913595	0.950698	0.82136	0.933275	0.915093	0.966814	0.9769	0.957112	0.954524	0.932889	0.950874	0.991455	0.923502	0.989881	0.877672	0.745382	0.859767	0.970568	0.918426	0.958259	0.952435	0.962623	1	0.97419	0.980354	0.965152	0.82653	0.942858	0.882173	0.890822	0.930224	0.987143	0.951279	0.958026	0.913839	0.931691	0.926477	0.90492
4.82657	8.40494	87.1605	1.49693e-14	9.26583e-13	Rian		12	109603808	109661716	0.997818	0.996245	0.99783	0.991337	0.913872	0.927568	0.950162	0.966963	0.960316	0.997348	0.993313	0.991424	0.974242	0.994523	0.983747	0.981211	0.886509	0.887843	0.901428	0.970206	0.954927	0.945404	0.965045	0.972178	0.997775	0.990947	1	0.971459	0.990486	0.990042	0.991899	0.987236	0.969356	0.984287	0.99895	0.97913	0.987277	0.997153	0.992692	0.999363
4.46007	0.875765	28.7211	1.61258e-06	5.35519e-05	Gm27350		12	109603882	109603979	1	1	1	1	0.902437	1	1	1	1	1	1	1	#NUM!	1	1	1	1	#NUM!	1	1	1	1	0.804207	1	1	1	#NUM!	1	1	1	1	1	#NUM!	1	1	1	#NUM!	1	1	1
5.16899	1.03974	45.0702	5.12761e-09	2.05105e-07	Mir1188	100316669	12	109611822	109611941	1	1	1	1	1	1	0.86246	1	1	1	1	1	1	1	1	1	1	1	1	1	1	1	0.506626	0.861947	1	1	1	1	0.735255	1	1	1	1	1	1	1	1	1	1	0.559277
5.08875	0.982149	37.1315	6.29168e-08	2.35307e-06	Gm24564		12	109631074	109631148	1	1	1	1	1	1	1	0.939111	1	1	1	1	#NUM!	1	1	1	1	1	1	1	1	1	1	0.892759	#NUM!	1	1	1	1	1	1	0.957592	1	1	1	1	1	1	1	1
3.85384	1.19527	37.5287	3.6468e-08	1.38777e-06	Gm23600		12	109643748	109643818	1	1	1	1	0.911328	0.823393	1	0.918769	1	1	1	1	1	1	1	1	0.67398	#NUM!	1	1	1	1	0.860358	1	1	1	1	1	1	1	0.937076	1	1	0.861599	1	#NUM!	1	1	1	1
5.00252	5.49298	110.571	6.92009e-17	5.57025e-15	Gm37899		12	109668869	109677585	0.994564	1	1	0.997363	0.916315	0.938906	0.945083	0.949466	0.946059	0.992452	1	0.997978	0.975311	1	1	1	0.929656	0.910574	0.918997	0.925184	0.978172	0.887395	0.961519	0.942938	1	1	1	0.98923	0.994512	0.990588	0.953438	0.991641	1	0.971623	1	0.979904	0.988818	0.996785	1	1
4.94088	0.554131	19.9617	4.62496e-05	0.00136036	Gm23787		12	109684962	109685034	1	1	1	1	1	1	1	1	#NUM!	1	1	1	1	1	1	1	0.733787	1	1	#NUM!	1	1	1	1	1	#NUM!	#NUM!	1	1	1	1	1	1	1	1	1	1	1	1	1
5.43978	0.696773	35.1793	1.935e-07	7.03506e-06	Gm22205		12	109688055	109688125	1	1	1	1	1	1	1	1	1	1	1	1	1	1	1	1	1	1	1	#NUM!	1	0.892158	1	1	#NUM!	#NUM!	#NUM!	1	1	1	1	1	1	1	1	1	0.850866	1	1	1
4.27038	0.234771	21.6526	2.48785e-05	0.000749804	Gm25224		12	109689477	109689544	1	1	1	1	1	1	1	1	#NUM!	1	1	1	#NUM!	1	1	1	0	1	1	#NUM!	1	1	1	1	#NUM!	1	1	1	#NUM!	1	1	1	1	1	1	#NUM!	1	1	1	1
4.10057	3.87296	76.8122	2.06253e-13	1.12376e-11	B830012L14Rik		12	109695586	109702587	1	1	0.969848	0.979635	0.873741	0.953962	0.926957	0.87969	0.9758	1	1	0.976576	1	0.985082	0.970579	1	0.920489	0.812296	0.876402	1	1	0.878622	0.979701	0.990931	1	1	1	0.966188	0.982369	0.991555	0.949836	0.994591	1	0.969847	1	1	0.975286	1	0.990316	1
3.46041	0.222736	15.5649	0.000202361	0.00549746	Mir654	100124453	12	109723218	109723301	1	1	1	1	1	1	1	0.755183	1	1	1	1	1	1	1	1	1	#NUM!	1	#NUM!	1	1	#NUM!	1	#NUM!	1	0.738532	1	0	1	#NUM!	1	1	#NUM!	1	#NUM!	1	1	1	1
4.71442	5.60392	109.946	7.91806e-17	6.32152e-15	Mirg	100040724	12	109729764	109749460	0.990191	1	0.996656	0.991634	0.921768	0.926407	0.909808	0.967552	0.962823	0.996261	0.98991	0.988217	0.944856	1	0.988761	0.98244	0.877174	0.861329	0.924345	1	0.953336	0.914535	0.966389	0.98082	0.637567	0.6761	0.784634	0.802798	0.946238	0.96346	0.93057	0.970363	0.879244	0.924687	0.920179	0.92997	0.983268	1	1	1
4.20183	1.06164	32.7619	1.94728e-07	7.06656e-06	Mir453	100124484	12	109735619	109735700	1	1	1	1	1	0.89234	1	0.804417	0.746864	1	1	1	1	1	1	1	1	1	0.673497	#NUM!	1	0.878622	1	1	#NUM!	1	0.484939	0.849674	1	1	1	1	1	1	1	1	1	1	1	1
6.13269	8.75316	66.5649	4.17597e-12	2.03982e-10	Gm4076		13	85126550	85127514	0.823627	0.873085	0.880318	0.861321	1	0.999723	1	0.999471	0.891331	0.803509	0.847403	0.791128	0.848783	0.825946	0.852284	0.898899	0.999708	0.999655	1	0.999044	1	1	1	1	0.90368	0.894653	0.818635	0.871197	1	0.999189	0.999703	1	0.99983	1	0.998569	1	0.886568	0.909395	0.870572	0.883048
5.77682	6.63878	129.022	1.56418e-18	1.72855e-16	Gm6169		13	97098208	97099237	0.969616	0.95623	0.99786	0.993967	0.950644	0.998264	0.99611	0.978652	0.961727	0.846447	1	1	0.98729	0.929003	1	1	0.987952	0.979568	0.992554	0.996458	0.973201	0.973699	0.992649	0.992029	0.955894	0.974377	1	1	0.934007	0.902746	0.99406	0.993128	0.969586	0.962186	0.998089	0.983745	0.894519	0.840742	1	1
6.92046	1.8379	94.2931	2.31365e-14	1.40543e-12	Gm5455		13	110304777	110305491	1	1	1	1	1	1	1	1	1	0.49574	1	1	1	0.825076	1	1	1	1	1	1	1	1	1	1	1	0.883025	1	1	1	0.936741	1	1	1	1	1	1	0.826222	0.825812	1	1
2.745	1.81702	13.423	0.000456612	0.0119403	Gzmd	14941	14	56129556	56132608	0.949895	0.714994	0.868806	0.754023	0.924998	1	1	1	0.929957	0.85758	1	0.773075	0.883928	#NUM!	0.58921	0.742088	1	0.969293	#NUM!	0.953726	1	1	1	1	1	1	0.888925	0.888979	0.974705	#NUM!	1	1	1	0.75685	0.963384	1	1	1	0.486366	0.91281
4.37451	1.91506	18.636	4.53082e-05	0.00133669	Gzmg	14944	14	56156582	56159579	1	1	1	1	1	0.873531	1	1	0.962364	1	1	1	1	#NUM!	1	1	1	0.896428	1	1	1	1	0.945819	0.67545	1	1	1	1	0.912393	1	0.867275	1	1	1	0.877683	0.959778	1	1	1	1
5.78631	1.41964	13.9621	0.000541807	0.0139444	Gzmc	14940	14	56231441	56234656	1	1	1	1	1	1	1	1	1	1	1	1	1	1	1	1	1	1	1	1	1	1	1	#NUM!	#NUM!	#NUM!	1	1	1	#NUM!	1	1	1	1	1	1	1	1	1	1
6.27427	1.65607	15.5899	0.000265971	0.00711682	Gzmb	14939	14	56258838	56262260	1	1	1	1	1	1	1	1	1	1	1	1	1	#NUM!	1	#NUM!	1	1	1	1	#NUM!	1	1	1	1	1	1	1	1	#NUM!	1	0.349649	1	1	1	1	1	1	1	#NUM!
-3.16313	3.52825	90.9038	6.03322e-15	3.90761e-13	Peg13	353342	15	72805600	72810324	0.191576	0.131745	0.180827	0.158703	0.0649337	0.0475563	0.0440752	0.134792	0.164366	0.0298063	0.107645	0.142731	0.100711	0.105481	0.142587	0.230602	0.141221	0.211331	0.0278515	0.118488	0.0330042	0.0352127	0.0706871	0.048794	0.224011	0.165731	0.273576	0.238972	0.0315197	0.10358	0.0471435	0.0890468	0.113624	0.0961816	0.132493	0.218334	0.0812667	0.0339266	0.186697	0.109374
-5.83602	9.94115	224.58	3.084e-25	1.0772e-22	Slc38a4	69354	15	96994820	97055956	0.00480597	0.00731171	0.00574852	0.0117375	0.022782	0.028425	0.0279116	0.0248694	0.0876419	0.0539165	0.267928	0.0864377	0.00642465	0.00365138	0.00549692	0.00544395	0.0535403	0.00768543	0.0154907	0.0215134	0.0924631	0.0572933	0.0092887	0.0203146	0.247457	0.0905441	0.336057	0.412634	0.228958	0.389991	0.405917	0.452142	0.362575	0.436149	0.469817	0.450752	0.006308	0.00608284	0.0150685	0.00996463
-2.08093	4.01339	19.6944	2.79541e-05	0.000838622	Galnt6	207839	15	100691813	100729376	0.144764	0.17971	0.0996725	0.0927077	0.369995	0.43368	0.544295	0.313653	0.205063	0.149716	0.12294	0.106107	0.112627	0.175998	0.178318	0.209776	0.371329	0.11815	0.607392	0.607192	0.333755	0.408075	0.283127	0.245389	0.157332	0.132091	0.249898	0.195103	0.669428	0.556745	0.347202	0.167785	0.458302	0.490693	0.372435	0.393358	0.170537	0.172597	0.17595	0.131165
2.22769	3.3539	15.0292	0.000212005	0.00573955	Pde10a	23984	17	8525372	8986648	0.810086	0.939477	0.711834	0.653549	0.897288	0.966678	0.86246	1	0.802933	1	0.789604	0.619385	0.740647	0.809345	0.58921	0.890738	1	0.955324	0.897611	0.971008	1	0.875139	0.957611	1	0.661932	0.733917	0.503461	0.687312	0.882839	0.925822	0.879581	1	0.912481	0.826774	0.824811	0.887071	0.808656	0.914866	0.706772	0.767611
1.82979	1.11507	12.6503	0.00063711	0.0162688	4732491K20Rik	224523	17	12318853	12327250	0.532159	1	0.768043	0.702205	0.804344	0.805609	1	1	0.855091	0.440241	0.896751	0.618649	0.851002	1	0.741513	0.48956	1	1	1	1	1	0	1	0.509947	0.539754	0.585991	0.360986	0.790274	0.80642	0.787325	0.515442	0.84317	0.406061	0.564641	0.838522	0.608795	0.919425	0.791352	0.71632	0.442314
8.09295	5.97227	140.187	3.27245e-19	4.18361e-17	Slc22a3	20519	17	12418960	12507704	1	0.986887	1	0.996864	0.993242	1	1	1	1	0.979046	1	0.984603	1	1	0.994379	0.993231	1	1	1	1	1	0.993329	1	1	0.969164	0.981011	1	0.991231	0.962584	0.988978	0.986488	0.968506	0.988853	0.983436	0.98662	0.970536	0.995358	0.986687	0.997425	1
3.86276	8.03985	162.34	3.63412e-21	6.64331e-19	Igf2r	16004	17	12682406	12769664	0.961481	0.956813	0.952931	0.952009	0.910034	0.91079	0.895222	0.871274	0.967013	0.917742	0.961	0.881181	0.968427	0.946263	0.961112	0.967599	0.898154	0.874413	0.888645	0.7928	0.901935	0.865524	0.85884	0.911799	0.966559	0.954043	0.969456	0.960867	0.868818	0.880767	0.858954	0.928899	0.814487	0.868275	0.805507	0.787472	0.953142	0.954138	0.948361	0.960344
-5.37562	3.17372	130.108	1.26459e-18	1.44651e-16	Airn	104103	17	12741311	12860136	0.0985899	0.0483911	0	0	0	0.0258783	0.0222149	0	0.0364475	0.0134703	0.161783	0.0126453	0.0530258	0	0	0.107053	0.0491426	0	0	0	0	0.034431	0	0.0632943	0.069816	0	0.099721	0.0349652	0.0122465	0.0458726	0.0867382	0.0127893	0.045866	0.0470816	0.0450791	0	0.032845	0.0279304	0.0305979	0.11261
1.8766	4.15896	36.7578	3.87762e-08	1.47274e-06	Dact2	240025	17	14195052	14204304	0.595513	0.738376	0.773564	0.753342	0.740238	0.950158	0.90526	0.898402	0.717567	0.685225	0.754838	0.599372	0.784231	0.697769	0.761189	0.653766	0.883451	0.92531	0.93413	0.880395	0.85909	0.802663	0.956987	0.94864	0.605117	0.603648	0.650489	0.625878	0.831846	0.87846	0.926211	0.76923	0.869036	0.869413	0.871931	0.857496	0.596639	0.662364	0.781527	0.655588
-0.973643	2.12881	10.5298	0.00169904	0.0407769	Metrn	70083	17	25793221	25797136	0.288885	0.238725	0.288482	0.361399	0.339445	0.429713	0.395108	0.376885	0.52526	0.49574	0.512854	0.612658	0.603657	0.485425	0.488811	0.545221	0.643987	0.433005	0.407437	0.673313	0.68609	0.431283	0.57172	0.488198	0.529598	0.39778	0.882796	0.439785	0.510154	0.547269	0.233084	0.425037	0.394892	0.633602	0.509457	0.383661	0.427633	0.580856	0.486366	0.159911
3.54764	0.768614	18.2611	6.02626e-05	0.00174887	Gda	14544	19	21391307	21473445	0.791301	1	1	1	0.672722	1	1	1	1	1	1	1	1	#NUM!	1	1	1	1	0.755748	1	1	0.805312	0.782326	1	1	#NUM!	1	1	0.757539	1	1	1	1	1	1	1	1	#NUM!	1	1
9.94834	7.33482	136.543	6.38483e-19	7.69105e-17	mt-Rnr1		MT	70	1024	0.998619	1	0.999072	0.996382	0.998803	1	0.999614	0.996868	1	0.995334	1	0.997995	0.987039	0.998556	1	0.998712	1	1	1	1	1	0.996755	1	1	1	1	1	0.994873	0.993545	1	0.997089	0.995929	0.999735	0.998234	0.998481	0.998238	0.997674	0.997944	0.995043	1
11.3789	8.20518	240.08	2.30017e-24	7.02989e-22	mt-Rnr2		MT	1094	2675	1	1	0.999191	1	1	0.998833	1	0.998696	1	1	0.998768	0.999557	1	1	1	1	1	1	1	1	1	1	1	1	1	1	1	1	1	1	1	1	0.999578	0.999664	1	1	1	1	1	0.998729
13.0775	12.3721	1747.08	3.37821e-57	1.32156e-53	mt-Nd1	17716	MT	2751	3707	0.999737	0.999715	0.999807	0.99996	1	0.999861	0.999962	1	0.999961	0.999914	0.999911	0.999421	0.99992	0.999958	1	0.999881	0.999937	1	0.999965	0.999849	0.999915	0.999964	0.99988	1	0.999968	0.999965	0.999922	1	0.999931	0.999969	0.999969	0.999949	0.999931	0.999969	0.99991	0.999878	0.999711	0.999925	0.99996	0.99984
8.77813	3.85242	128.431	1.53801e-14	9.49004e-13	mt-Ti		MT	3706	3774	1	1	1	1	1	1	1	1	1	1	1	1	1	1	1	1	1	1	1	1	1	1	1	1	1	1	1	1	1	1	1	1	1	1	1	1	1	1	1	1
10.1452	5.25232	245.36	3.97655e-20	5.80457e-18	mt-Tq		MT	3772	3842	1	1	1	1	1	1	1	1	1	1	1	1	1	1	1	1	1	1	1	1	1	1	1	1	1	1	1	1	1	1	1	1	1	1	1	1	1	1	1	1
9.35181	4.86916	117.57	2.09393e-15	1.42213e-13	mt-Tm		MT	3845	3913	1	1	1	1	1	1	1	1	1	1	1	1	1	1	1	1	0.985334	1	1	1	1	1	1	1	1	1	1	0.984629	1	1	0.997684	1	1	0.997932	1	0.997173	1	1	1	1
12.0701	10.2167	1713.81	7.19277e-57	2.00987e-53	mt-Nd2	17717	MT	3914	4951	1	1	0.999744	0.999811	1	0.999401	0.999538	0.999856	1	0.999636	0.999784	1	0.999802	0.999837	1	0.999834	0.999719	1	1	0.999802	0.999866	0.999835	1	0.999848	0.999859	0.999701	0.999673	0.999584	0.999906	0.999747	0.999603	0.999302	0.99983	0.999077	0.999635	0.999414	0.999414	0.999652	0.999658	1
7.87181	4.73766	112.034	1.22857e-15	8.67537e-14	mt-Tw		MT	4950	5016	0.983269	1	1	1	1	0.990891	1	1	1	1	1	1	1	1	1	1	1	1	1	1	1	1	1	1	1	1	1	1	1	0.994596	1	1	1	1	1	0.996721	1	1	1	1
7.52218	2.85524	134.607	1.47741e-16	1.15132e-14	mt-Ta		MT	5018	5086	1	1	1	1	1	1	1	1	1	1	1	1	1	1	1	1	1	1	1	1	1	1	0.948675	1	1	0.976992	1	1	1	1	1	1	1	1	0.986431	1	1	1	1	1
8.07483	2.86071	178.366	5.91719e-17	4.84269e-15	mt-Tn		MT	5089	5159	1	1	1	1	1	1	1	1	1	1	1	1	1	1	1	1	1	1	1	1	1	1	1	1	1	1	1	1	1	1	1	1	1	1	1	1	1	1	1	1
8.76236	5.16571	415.328	3.21634e-31	2.51646e-28	mt-Tc		MT	5192	5257	1	1	0.993312	1	1	1	1	0.991391	1	0.972428	1	0.990218	1	1	1	1	0.995303	1	0.994123	1	1	1	1	1	1	0.996243	1	0.991613	1	1	1	1	1	1	1	1	1	1	1	1
7.54546	3.5283	224.68	1.38615e-23	3.61507e-21	mt-Ty		MT	5260	5326	1	1	1	1	1	1	1	0.973695	1	1	1	1	1	1	1	1	1	1	0.989897	1	1	1	1	1	1	1	1	1	1	1	1	1	1	1	1	0.986417	1	1	1	1
11.7762	13.6173	2214.68	2.87743e-61	5.62826e-57	mt-Co1	17708	MT	5328	6872	0.999741	0.999589	0.999592	0.999672	0.999776	0.999771	0.999833	0.999792	0.99951	0.999214	0.999852	0.999251	0.999741	0.999679	0.999698	0.99972	0.999839	0.999804	0.999848	0.999801	0.999858	0.999931	0.999889	0.999692	0.999628	0.99957	0.999868	0.999704	0.999915	0.999819	0.999924	0.999854	0.999865	0.999751	0.999762	0.999857	0.99958	0.999671	0.999779	0.999647
11.0671	9.14318	1847.31	3.75841e-58	1.83786e-54	mt-Ts1		MT	6870	6938	1	0.999248	0.998949	0.999655	0.999163	1	0.999609	1	0.999256	0.998989	0.999725	0.999047	0.999756	0.999144	0.999442	0.998817	0.999632	0.998995	0.99963	0.998416	1	0.999622	1	1	1	0.999564	0.999769	0.999703	0.999414	0.999179	0.99939	0.999391	0.999491	0.998653	0.999684	1	0.99917	1	0.999501	0.999727
10.5451	10.2906	1116.18	1.23585e-49	2.41732e-46	mt-Atp6	17705	MT	7927	8607	0.998288	0.997999	0.99942	0.999079	0.999402	0.999873	0.999846	0.999871	0.998846	0.998799	0.999719	0.996937	0.999307	0.999094	0.998524	0.999148	0.99951	0.999755	0.999865	1	0.999882	0.999876	0.999898	0.999407	0.999232	0.998281	0.99951	0.998945	0.999786	0.999882	1	0.99974	0.999485	0.99979	0.99967	0.999885	0.999009	0.998292	0.999563	0.999478
11.851	10.9989	747.169	4.08511e-42	5.32698e-39	mt-Co3	17710	MT	8607	9390	0.999579	0.999631	0.998806	0.999669	0.999912	0.999828	0.999907	1	0.999341	0.998366	0.999374	0.999246	0.999299	0.99937	0.999384	0.999382	1	1	1	0.999865	1	1	1	1	0.99959	0.997993	0.999108	0.999419	1	0.999224	0.99992	1	1	1	0.999936	1	0.999012	0.998383	0.999558	0.999175
11.9691	9.34313	1859.4	8.26695e-57	2.02127e-53	mt-Nd3	17718	MT	9459	9806	1	0.999238	0.999548	1	0.999659	1	1	0.999692	1	1	0.998934	1	0.99944	0.999719	0.999645	1	0.999503	0.999649	1	0.999359	0.999464	1	0.999454	0.999532	1	1	0.999771	0.99966	1	1	1	1	0.999821	0.999725	1	0.999727	1	1	1	0.999511
10.2452	9.36169	224.298	3.20363e-25	1.09935e-22	mt-Nd4l	17720	MT	9877	10173	0.999021	0.999525	0.999436	0.999051	0.998812	1	0.998733	0.998918	0.999726	0.99894	0.999656	0.999417	0.999598	0.999176	0.999245	0.999317	0.99798	0.997111	1	0.998852	1	0.998885	0.997009	0.998829	0.999626	0.999191	0.999167	0.999463	0.998363	1	0.998922	1	0.999308	1	0.995566	0.998997	0.998937	0.999347	0.998735	0.999189
11.9675	11.5634	1713.83	7.18961e-57	2.00987e-53	mt-Nd4	17719	MT	10167	11544	0.999514	0.999475	0.999564	0.999852	0.999866	0.999873	0.999804	1	0.999852	0.99971	0.999747	0.999859	0.999931	0.999855	0.999464	0.999769	0.999671	1	0.999888	0.999788	0.999946	0.999815	0.999721	0.999763	0.999806	0.999735	0.999782	0.999914	0.999773	0.999789	0.999939	0.999949	0.999886	0.999846	0.999848	1	0.999659	0.999547	0.999458	0.999925
12.2213	11.2422	2163.11	7.3273e-61	7.1661e-57	mt-Nd5	17721	MT	11742	13565	0.999622	0.999706	0.999896	0.999829	0.999824	0.999855	0.999913	0.999786	0.999706	0.999837	0.999362	0.999492	0.999834	0.999683	0.999829	0.99982	0.999412	0.999904	0.999743	0.999757	0.999864	0.999786	0.999733	0.999595	0.999779	0.99962	0.999848	0.999918	0.999838	0.999926	0.999843	0.999544	0.999903	1	0.999857	0.999392	0.999826	0.999923	1	0.999842
8.82933	9.9008	437.679	1.08596e-34	1.11797e-31	mt-Nd6	17722	MT	13552	14070	0.995638	0.995324	0.994653	0.996293	0.999106	0.999415	0.999759	0.99981	0.99476	0.989292	0.99071	0.992672	0.994789	0.995398	0.995566	0.991305	1	0.999783	0.99978	1	0.999618	0.999732	0.999719	0.999614	0.998031	0.995885	0.993001	0.995403	0.999833	0.99949	0.999645	0.999799	0.999637	0.999652	0.999782	0.999407	0.996831	0.998256	0.993736	0.99398
8.15114	3.23402	127.89	6.44951e-15	4.13615e-13	mt-Te		MT	14071	14139	1	1	1	1	1	1	1	1	1	1	1	1	1	1	1	1	1	1	1	1	1	1	1	1	1	1	1	1	1	1	1	0.994714	1	1	1	1	1	1	1	1
11.5793	12.6202	1860.4	2.84484e-58	1.83786e-54	mt-Cytb	17711	MT	14145	15288	0.999465	0.999621	0.999732	0.999645	0.999733	0.999759	0.999809	0.999702	0.999727	0.999394	0.999642	0.998981	0.999758	0.999659	0.999686	0.999711	0.999585	0.999661	0.99965	0.999792	0.999771	0.999778	0.999639	0.999838	0.999114	0.999372	0.999752	0.999689	0.999737	0.999647	0.999621	0.999463	0.999934	0.99952	0.999635	0.999944	0.999375	0.999487	0.999644	0.999703
7.63067	2.58592	118.619	5.55028e-14	3.20246e-12	mt-Tt		MT	15289	15355	1	1	1	1	1	1	1	1	1	1	1	1	1	1	1	1	1	1	1	1	1	1	1	1	1	1	1	1	1	1	1	1	1	1	1	1	1	1	1	1
9.17745	4.19951	258.89	1.3864e-20	2.29813e-18	mt-Tp		MT	15356	15422	1	1	1	1	1	1	1	1	1	1	1	1	1	1	1	1	1	1	1	1	1	1	1	1	1	1	1	1	1	1	1	1	1	1	1	1	1	1	1	1
[truncated: 105 more columns]
